# Supplementary material for: Xylem Sap Proteomics Reveals Distinct Differences Between R Gene- and Endophyte-Mediated Resistance Against Fusarium Wilt Disease in Tomato
Source: Front Microbiol. 2018 Dec 4;9:2977. doi: 10.3389/fmicb.2018.02977 (PMC6288350; doi:10.3389/fmicb.2018.02977)
Supplement: TABLE S3 — Tomato proteins identified and label-free quantified in Bioassay 2. Samples labeled as ‘Mock’ for the water control, and ‘Patho’ for Fol007-inoculated KG324 resistant tomato plants. DAPs are marked with +. LFQ values are represented in Log10 scale. Sequence coverage (%), molecular weight (KDa), GO description and SecretomeP and ApoplastP outputs are provided for all the proteins. [file Table_3.XLSX]

## Sheet: Bioassay 2
36_Mock_i2S1	37_Mock_i2S2	38_Mock_i2S3	39_Mock_i2S4	40_Fol007_i2S1	41_Fol007_i2S2	42_Fol007_i2S3	43_Fol007_i2S4	Only identified by site	Reverse	Potential contaminant	FilteredRows	Student's T-test Significant Fol007_Mock	Student's T-test significant	id	Number of proteins	Peptides	Unique peptides	Sequence coverage	Mol weight kDa	Sequence length	Q value	Score	Intensity	iBAQ	iBAQ FR36_Mock_i2S1	iBAQ FR37_Mock_i2S2	iBAQ FR38_Mock_i2S3	iBAQ FR39_Mock_i2S4	iBAQ FR40_Fol007_i2S1	iBAQ FR41_Fol007_i2S2	iBAQ FR42_Fol007_i2S3	iBAQ FR43_Fol007_i2S4	-Log Student's T-test p-value Fol007_Mock	Student's T-test q-value Fol007_Mock	Student's T-test Difference Fol007_Mock	Student's T-test Test statistic Fol007_Mock	Protein IDs	Majority protein IDs	GO headers	Bincode_GO	Name_bincode	Description_GO	GO_categories	Functional description	SecretomeP_output	ApoplastP_output	Fasta headers
#!{Type}E	E	E	E	E	E	E	E	C	C	C	C	C	C	N	N	N	N	N	N	N	N	N	N	N	N	N	N	N	N	N	N	N	N	N	N	N	T	T									T
#!{C:Group1}Mock	Mock	Mock	Mock	Fol007	Fol007	Fol007	Fol007
8.853	8.31702	8.2351	8.25631	8.41691	8.49042	8.20469	8.73208							0	1	9	9	29.1	28.311	261	0	53.388	6807400000	523640000	69697000	64924000	17259000	49330000	97828000	151670000	23332000	49604000	0.0909518	1	0.0456686	0.0386107	A7X331	A7X331	A7X331	'10.7'	cell wall.modification'	(at3g45970 : 319.0) member of EXPANSIN-LIKE. Naming convention from the Expansin Working Group (Kende et al, 2004. Plant Mol Bio); expansin-like A1 (EXLA1); INVOLVED IN: unidimensional cell growth, plant-type cell wall loosening; LOCATED IN: cell wall, plant-type cell wall; EXPRESSED IN: 20 plant structures; EXPRESSED DURING: 10 growth stages; CONTAINS InterPro DOMAIN/s: Barwin-related endoglucan…	cell wall	Expansin-like protein	Convencional Secreted (SignP)	Apoplastic	>tr|A7X331|A7X331_SOLLC Expansin-like protein OS=Solanum lycopersicum GN=EXLA1 PE=2 SV=1
7.73893	7.73003	7.48292	7.63247	7.33025	7.23543	7.56095	6.97437							1	6	11	11	24.9	56.957	503	0	107.59	849130000	35380000	3156100	9348500	1720400	8130800	4444900	3036300	4933300	610000	1.47396	0.843795	-0.370838	-0.326682	B1Q3F1;K4C284;B1Q3F2;K4BQZ8;P54767;B1Q3F0	B1Q3F1	B1Q3F1	'13.1.1.1.1'	amino acid metabolism.synthesis.central amino acid metabolism.GABA.Glutamate decarboxylase'	'(q07346|dce_pethy : 906.0) Glutamate decarboxylase (EC 4.1.1.15) (GAD) - Petunia hybrida (Petunia) & (at5g17330 : 867.0) Encodes one of two isoforms of glutamate decarboxylase.; glutamate decarboxylase (GAD); FUNCTIONS IN: calmodulin binding, glutamate decarboxylase activity; INVOLVED IN: response to cadmium ion; EXPRESSED IN: 13 plant structures; EXPRESSED DURING: 6 growth stages; CONTAINS Inte…	metabolism	Glutamate decarboxylase	Non-Secreted	Non-apoplastic	>tr|B1Q3F1|B1Q3F1_SOLLC Glutamate decarboxylase OS=Solanum lycopersicum GN=LeGAD2 PE=2 SV=1
7.05227	6.2304	5.8778	5.5	5.5	5.5	5.5	5.5							3	1	3	3	8.9	50.921	459	0	3.5651	28692000	1434600	492810	652140	53866	0	113130	39488	0	83199	1.03918	1	-0.665118	-0.499642	B5M9E5	B5M9E5	B5M9E5	'26.4.1'	misc.beta 1,3 glucan hydrolases.glucan endo-1,3-beta-glucosidase'	'(at3g55430 : 452.0) O-Glycosyl hydrolases family 17 protein; FUNCTIONS IN: cation binding, hydrolase activity, hydrolyzing O-glycosyl compounds, catalytic activity; INVOLVED IN: carbohydrate metabolic process; LOCATED IN: cell wall; EXPRESSED IN: 24 plant structures; EXPRESSED DURING: 15 growth stages; CONTAINS InterPro DOMAIN/s: X8 (InterPro:IPR012946), Glycoside hydrolase, catalytic core (Inte…	stress response	Beta-glucosidase 08	Convencional Secreted (SignP)	Non-apoplastic	>tr|B5M9E5|B5M9E5_SOLLC Beta-glucosidase 08 OS=Solanum lycopersicum PE=2 SV=1
7.04614	6.40329	7.03088	7.30475	6.86522	6.70059	6.78756	6.81355							4	1	6	6	15.2	42.587	394	0	7.964	219130000	8765300	423510	768870	416030	3255600	888860	1791400	850900	370180	0.339624	0.896395	-0.154537	-0.129357	C5IU71	C5IU71	C5IU71	'1.3.9'	'PS.calvin cycle.seduheptulose bisphosphatase'	'(o20252|s17p_spiol : 616.0) Sedoheptulose-1,7-bisphosphatase, chloroplast precursor (EC 3.1.3.37) (Sedoheptulose-bisphosphatase) (SBPase) (SED(1,7)P2ase) - Spinacia oleracea (Spinach) & (at3g55800 : 602.0) Encodes the chloroplast enzyme sedoheptulose-1,7-bisphosphatase (SBPase), involved in the carbon reduction of the Calvin cycle. Increase in SBPase activity in transgenic lines accumulate up to…	others	Chloroplast sedoheptulose-1,7-bisphosphatase	Non-Secreted	Non-apoplastic	>tr|C5IU71|C5IU71_SOLLC Chloroplast sedoheptulose-1,7-bisphosphatase OS=Solanum lycopersicum GN=SBPase PE=2 SV=1
7.66934	7.59884	7.74032	7.85977	7.81535	7.81867	7.61765	8.03137							14	1	9	9	18.1	64.023	575	0	57.242	1518800000	66035000	3658800	7824700	4545900	11693000	13770000	10945000	5897200	7700700	0.462314	0.96824	0.103691	0.0941651	D3TI69	D3TI69	D3TI69	'29.7.5'	protein.glycosylation.alpha-1,3-mannosyl-glycoprotein-beta-1,2-N-acetylglucosaminyltransferase(GnTI)'	'(at1g05590 : 757.0) Encodes a protein with &#946;-hexosaminidase activity (the enzyme is active with p-nitrophenyl-&#946;-N-acetylglucosaminide as substrate but displayed only a minor activity toward p-nitrophenyl-&#946;-N-acetylgalactosaminide). Chitotriose-PA was digested almost completely overnight by a 50% ammonium sulfate fraction of a supernatant yeast expressing AtHEX3.; beta-hexosaminida…	protein	Beta-hexosaminidase	Convencional Secreted (SignP)	Apoplastic	>tr|D3TI69|D3TI69_SOLLC Beta-hexosaminidase OS=Solanum lycopersicum PE=2 SV=1
7.28128	8.47349	8.4851	8.53301	8.42413	8.43799	8.4268	7.59159							15	2	24	24	27	116.48	1028	0	155.65	6517700000	120700000	433680	22111000	8402700	27225000	23031000	21649000	17062000	784800	0.0248891	1	0.0269083	0.0196493	E0XN34;K4BAN8	E0XN34	E0XN34	'26.3.3'	misc.gluco-, galacto- and mannosidases.alpha-mannosidase'	(at5g13980 : 1452.0) Glycosyl hydrolase family 38 protein; FUNCTIONS IN: in 6 functions; INVOLVED IN: mannose metabolic process, carbohydrate metabolic process; LOCATED IN: apoplast, cell wall, plasma membrane, vacuole, plant-type cell wall; EXPRESSED IN: 25 plant structures; EXPRESSED DURING: 13 growth stages; CONTAINS InterPro DOMAIN/s: Glycoside hydrolase-type carbohydrate-binding (InterPro:IP…	cell wall	Alpha-mannosidase	Convencional Secreted (SignP)	Non-apoplastic	>tr|E0XN34|E0XN34_SOLLC Alpha-mannosidase OS=Solanum lycopersicum PE=2 SV=1
8.86758	8.706	8.57138	8.68227	8.80415	8.68781	8.52224	8.93809							16	4	30	30	41.8	93.212	852	0	240.9	12712000000	310060000	20554000	47437000	17880000	52786000	62212000	46569000	27215000	35404000	0.10754	1	0.031266	0.0282351	E3UVW7;K4D6Q8;K4D6Q4;K4BVG3	E3UVW7	E3UVW7	'26.3.2'	'misc.gluco-, galacto- and mannosidases.beta-galactosidase'	'(at2g28470 : 1218.0) putative beta-galactosidase (BGAL8 gene); beta-galactosidase 8 (BGAL8); FUNCTIONS IN: cation binding, sugar binding, beta-galactosidase activity, hydrolase activity, hydrolyzing O-glycosyl compounds, catalytic activity; INVOLVED IN: carbohydrate metabolic process; EXPRESSED IN: 26 plant structures; EXPRESSED DURING: 13 growth stages; CONTAINS InterPro DOMAIN/s: Glycoside hyd…	cell wall	Beta-galactosidase	Convencional Secreted (SignP)	Apoplastic	>tr|E3UVW7|E3UVW7_SOLLC Beta-galactosidase OS=Solanum lycopersicum PE=2 SV=3
5.5	7.69016	7.58118	7.07482	7.20594	7.58321	7.76855	6.7904							17	2	11	11	14.8	85.487	777	0	16.362	699470000	14572000	27275	4037900	1778000	1185300	1536900	2498900	3365400	142730	0.283932	0.814356	0.375487	0.24229	H1AC32;K4BTS4	H1AC32	H1AC32	'10.6.2'	'cell wall.degradation.mannan-xylose-arabinose-fucose'	(at1g78060 : 984.0) Glycosyl hydrolase family protein; FUNCTIONS IN: hydrolase activity, hydrolyzing O-glycosyl compounds; INVOLVED IN: carbohydrate metabolic process; LOCATED IN: apoplast, cell wall, chloroplast, plant-type cell wall; EXPRESSED IN: 22 plant structures; EXPRESSED DURING: 13 growth stages; CONTAINS InterPro DOMAIN/s: Glycoside hydrolase, family 3, N-terminal (InterPro:IPR001764), …	cell wall	SlArf protein ( Xyl3protein )	Convencional Secreted (SignP)	Non-apoplastic	>tr|H1AC32|H1AC32_SOLLC SlArf protein ( Xyl3protein ) OS=Solanum lycopersicum GN=SlArf PE=2 SV=1
7.62288	8.17713	8.33494	8.07401	7.99235	8.02432	8.34795	7.57827							20	1	11	10	44	35.818	327	0	89.911	3695400000	263960000	5104100	59077000	27723000	42137000	33205000	39945000	50522000	6244800	0.112226	0.998789	-0.0665148	-0.0545347	K4ASJ5	K4ASJ5	K4ASJ5	'26.12'	'misc.peroxidases'	'(p11965|perx_tobac : 483.0) Lignin-forming anionic peroxidase precursor (EC 1.11.1.7) (TOPA) - Nicotiana tabacum (Common tobacco) & (gnl|cdd|29388 : 452.0) no description available & (at5g06720 : 389.0) peroxidase 2 (PA2); FUNCTIONS IN: peroxidase activity, heme binding; INVOLVED IN: oxidation reduction, response to oxidative stress; LOCATED IN: endomembrane system; EXPRESSED IN: 21 plant struct…	peroxidases	Peroxidase	Convencional Secreted (SignP)	Non-apoplastic	>tr|K4ASJ5|K4ASJ5_SOLLC Peroxidase OS=Solanum lycopersicum PE=3 SV=1
8.46982	8.72563	8.69112	8.68593	8.60643	8.68121	8.86215	8.88545							21	1	9	8	35.7	34.954	325	0	130.11	14383000000	1598100000	55008000	217480000	160550000	273440000	207180000	231550000	297640000	155220000	0.610033	0.963	0.115688	0.106148	K4ASJ6	K4ASJ6	K4ASJ6	'26.12'	'misc.peroxidases'	'(p11965|perx_tobac : 469.0) Lignin-forming anionic peroxidase precursor (EC 1.11.1.7) (TOPA) - Nicotiana tabacum (Common tobacco) & (gnl|cdd|29388 : 441.0) no description available & (at5g06720 : 368.0) peroxidase 2 (PA2); FUNCTIONS IN: peroxidase activity, heme binding; INVOLVED IN: oxidation reduction, response to oxidative stress; LOCATED IN: endomembrane system; EXPRESSED IN: 21 plant struct…	peroxidases	Peroxidase	Convencional Secreted (SignP)	Apoplastic	>tr|K4ASJ6|K4ASJ6_SOLLC Peroxidase OS=Solanum lycopersicum PE=3 SV=1
6.21384	6.44284	6.25571	5.5	5.5	5.5	5.5	5.5							23	1	3	2	14.2	29.259	267	0	3.3676	34716000	2314400	101950	933490	136650	539580	181530	202230	172890	46101	1.57011	1	-0.603096	-0.499622	K4ASX2	K4ASX2	K4ASX2	'21.5.1'	'redox.peroxiredoxin.BAS1'	(at5g06290 : 379.0) Encodes a 2-Cys peroxiredoxin (2-Cys PrxB) that contains two catalytic Cys residues.; 2-cysteine peroxiredoxin B (2-Cys Prx B); FUNCTIONS IN: peroxiredoxin activity, antioxidant activity; INVOLVED IN: response to cold, defense response to bacterium; LOCATED IN: apoplast, stromule, chloroplast stroma, chloroplast; EXPRESSED IN: 23 plant structures; EXPRESSED DURING: 13 growth s…	redox	Peroxiredoxin	Non-Secreted	Non-apoplastic	>tr|K4ASX2|K4ASX2_SOLLC Uncharacterized protein OS=Solanum lycopersicum PE=4 SV=1
7.41774	7.58421	7.91643	7.39891	8.11116	8.04183	8.23221	7.09051							24	3	13	13	40.8	37.571	336	0	53.667	1893000000	126200000	3041000	12912000	9658500	6998600	37834000	21731000	32864000	1157300	0.450731	0.802762	0.289605	0.22476	Q01412;K4AT60;K4AT59	Q01412;K4AT60	Q01412	'26.4.1'	'misc.beta 1,3 glucan hydrolases.glucan endo-1,3-beta-glucosidase'	(p23547|e13g_tobac : 490.0) Glucan endo-1,3-beta-glucosidase, acidic isoform GI9 precursor (EC 3.2.1.39) ((1->3)-beta-glucan endohydrolase) ((1->3)-beta-glucanase) (Beta-1,3-endoglucanase) (PR-2B) (PR-36) - Nicotiana tabacum (Common tobacco) & (gnl|cdd|84700 : 432.0) no description available & (at4g16260 : 314.0) Glycosyl hydrolase superfamily protein; FUNCTIONS IN: cation binding, hydrolase acti…	stress response	Glucan endo-1,3-beta-glucosidase A	Convencional Secreted (SignP)	Apoplastic	>sp|Q01412|E13A_SOLLC Glucan endo-1,3-beta-glucosidase A OS=Solanum lycopersicum PE=1 SV=1;>tr|K4AT60|K4AT60_SOLLC Uncharacterized protein OS=Solanum lycopersicum PE=3 SV=1
5.5	7.11032	7.00139	7.05717	6.41677	7.21405	6.88197	5.5							26	1	3	3	19	26.535	248	0	25.38	204710000	13648000	21599	2803100	1821100	5028300	256040	1176000	2541400	0	0.11287	0.963904	-0.164022	-0.106583	K4ATJ4	K4ATJ4	K4ATJ4	'31.3.1'	'cell.cycle.peptidylprolyl isomerase'	'(at5g13120 : 294.0) Encodes a lumenal cyclophilin with peptidyl-prolyl isomerase activity that is associated with the NAD(P)H dehydrogenase complex in stromal regions of the thylakoid membrane. It is likely to be important for the accumulation of the hydrophobic domain of the NAD(P)H dehydrogenase complex. This complex is associated with PSI and is responsible for the reduction of plastoquinone.…	others	Peptidyl-prolyl cis-trans isomerase	Leaderless Secreted	Apoplastic	>tr|K4ATJ4|K4ATJ4_SOLLC Peptidyl-prolyl cis-trans isomerase OS=Solanum lycopersicum PE=3 SV=1
5.5	6.82555	5.5	5.5	5.5	6.75667	5.5	7.09454							27	2	3	3	8.6	54.98	490	0	2.8145	96129000	4806500	758350	1132500	0	275660	215830	930630	451650	1041900	0.300151	0.7956	0.381416	0.248827	K4ATR4;K4ATR5	K4ATR4	K4ATR4	'29.5.5'	'protein.degradation.serine protease'	'(gnl|cdd|36496 : 400.0) no description available & (at1g28110 : 386.0) serine carboxypeptidase-like 45 (SCPL45); FUNCTIONS IN: serine-type carboxypeptidase activity; INVOLVED IN: proteolysis; LOCATED IN: plant-type cell wall; EXPRESSED IN: 21 plant structures; EXPRESSED DURING: 13 growth stages; CONTAINS InterPro DOMAIN/s: Peptidase S10, serine carboxypeptidase (InterPro:IPR001563), Peptidase S1…	protein	Serine carboxypeptidase	Convencional Secreted (SignP)	Non-apoplastic	>tr|K4ATR4|K4ATR4_SOLLC Carboxypeptidase OS=Solanum lycopersicum PE=3 SV=1
7.79793	9.47922	9.52854	9.50129	9.40243	9.58094	9.5162	9.79622							29	2	15	14	41.2	35.838	330	0	236.73	83606000000	5573700000	20453000	924500000	444050000	871120000	841690000	1059500000	656000000	756410000	0.528809	0.828588	0.497205	0.346641	K4AUE2;K4AW60	K4AUE2	K4AUE2	'26.12'	'misc.peroxidases'	'(gnl|cdd|29388 : 439.0) no description available & (at5g19890 : 369.0) Peroxidase superfamily protein; FUNCTIONS IN: peroxidase activity, heme binding; INVOLVED IN: oxidation reduction, response to oxidative stress; LOCATED IN: nucleus, cytoplasm; EXPRESSED IN: 17 plant structures; EXPRESSED DURING: 10 growth stages; CONTAINS InterPro DOMAIN/s: Haem peroxidase (InterPro:IPR010255), Plant peroxid…	peroxidases	Peroxidase	Convencional Secreted (SignP)	Apoplastic	>tr|K4AUE2|K4AUE2_SOLLC Peroxidase OS=Solanum lycopersicum PE=3 SV=1
7.79641	7.68028	7.84577	7.97345	7.32006	7.94211	8.02111	7.65639							32	3	4	4	28.3	15.241	152	0	22.586	1554100000	194260000	9906600	22539000	13960000	45889000	14066000	35914000	42743000	9240200	0.208027	0.982483	-0.0890591	-0.0761105	Q43779;P14830;K4AX22	Q43779;P14830;K4AX22	Q43779	'21.6'	'redox.dismutases and catalases'	'(p27082|sodc_nicpl : 241.0) Superoxide dismutase [Cu-Zn] (EC 1.15.1.1) - Nicotiana plumbaginifolia (Leadwort-leaved tobacco) & (at1g08830 : 215.0) Encodes a cytosolic copper/zinc superoxide dismutase CSD1 that can detoxify superoxide radicals. Its expression is affected by miR398-directed mRNA cleavage. Regulated by biotic and abiotic stress.; copper/zinc superoxide dismutase 1 (CSD1); CONTAINS …	redox	Superoxide dismutase [Cu-Zn]	Leaderless Secreted	Apoplastic	>sp|Q43779|SODC2_SOLLC Superoxide dismutase [Cu-Zn] 2 OS=Solanum lycopersicum GN=SODCC.5 PE=3 SV=3;>sp|P14830|SODC1_SOLLC Superoxide dismutase [Cu-Zn] 1 OS=Solanum lycopersicum GN=SODCC.1 PE=2 SV=2;>tr|K4AX22|K4AX22_SOLLC Superoxide dismutase [Cu-Zn] OS=So
8.14545	8.10626	8.0992	8.08721	8.11458	8.12457	8.05011	8.21574							33	1	12	12	27.6	54.041	485	0	106.54	2822200000	141110000	12049000	29301000	12245000	26491000	17022000	22508000	9240100	12255000	0.179362	0.994403	0.016721	0.0161346	K4AX61	K4AX61	K4AX61	'35.2'	'not assigned.unknown'	'(at2g47010 : 692.0) unknown protein; FUNCTIONS IN: molecular_function unknown; INVOLVED IN: biological_process unknown; LOCATED IN: endomembrane system; EXPRESSED IN: 17 plant structures; EXPRESSED DURING: 10 growth stages; BEST Arabidopsis thaliana protein match is: unknown protein (TAIR:AT1G17030.1); Has 72 Blast hits to 72 proteins in 13 species: Archae - 0; Bacteria - 0; Metazoa - 0; Fungi -…	not assigned	Unknown protein	Convencional Secreted (SignP)	Non-apoplastic	>tr|K4AX61|K4AX61_SOLLC Uncharacterized protein OS=Solanum lycopersicum PE=4 SV=1
8.36791	7.55072	6.78589	7.73724	7.82545	7.59466	6.82448	8.04988							34	1	10	10	17.7	71.316	639	0	51.863	1340600000	67032000	12376000	9642300	453040	15777000	14162000	6695900	936580	6989400	0.0300626	1	-0.0368235	-0.0259169	K4AX84	K4AX84	K4AX84	'26.13'	'misc.acid and other phosphatases'	'(at5g50400 : 350.0) purple acid phosphatase 27 (PAP27); FUNCTIONS IN: protein serine/threonine phosphatase activity, acid phosphatase activity; INVOLVED IN: biological_process unknown; LOCATED IN: endomembrane system; EXPRESSED IN: 24 plant structures; EXPRESSED DURING: 15 growth stages; CONTAINS InterPro DOMAIN/s: Purple acid phosphatase, N-terminal (InterPro:IPR015914), Metallophosphoesterase …	metabolism	Purple acid phosphatase	Convencional Secreted (SignP)	Non-apoplastic	>tr|K4AX84|K4AX84_SOLLC Purple acid phosphatase OS=Solanum lycopersicum PE=3 SV=1
8.22357	8.01774	8.0758	8.02239	8.26661	8.19123	8.12652	8.34013							36	1	10	10	36.2	40.627	362	0	55.837	3662200000	228890000	14099000	27694000	17042000	33674000	50394000	39745000	27768000	18471000	1.14959	0.896579	0.146244	0.137098	K4AXG2	K4AXG2	K4AXG2	'26.28'	'misc.GDSL-motif lipase'	(at1g56670 : 333.0) GDSL-like Lipase/Acylhydrolase superfamily protein; FUNCTIONS IN: hydrolase activity, acting on ester bonds, carboxylesterase activity; INVOLVED IN: lipid metabolic process; LOCATED IN: endomembrane system; EXPRESSED IN: 10 plant structures; EXPRESSED DURING: 6 growth stages; CONTAINS InterPro DOMAIN/s: Lipase, GDSL (InterPro:IPR001087); BEST Arabidopsis thaliana protein match…	metabolism	GDSL-like Lipase/Acylhydrolase	Convencional Secreted (SignP)	Apoplastic	>tr|K4AXG2|K4AXG2_SOLLC Uncharacterized protein OS=Solanum lycopersicum PE=4 SV=1
8.12215	7.7347	7.51126	7.57985	7.77448	7.62191	7.55133	8.09781							38	6	10	10	26.2	47.301	428	0	34.688	1284100000	51366000	4435800	9878600	2640800	7690600	8047400	5118600	4584300	8969700	0.0466272	1	0.0243933	0.0206236	K4AXP0;K4AXN7;K4AXN5;K4AXN6;K4AXN9;K4AXN8	K4AXP0	K4AXP0	'29.5.4'	'protein.degradation.aspartate protease'	'(at1g03230 : 302.0) Eukaryotic aspartyl protease family protein; FUNCTIONS IN: aspartic-type endopeptidase activity; INVOLVED IN: response to salt stress; LOCATED IN: cell wall, plant-type cell wall; EXPRESSED IN: stem, root; CONTAINS InterPro DOMAIN/s: Peptidase aspartic (InterPro:IPR021109), Peptidase aspartic, catalytic (InterPro:IPR009007), Peptidase A1 (InterPro:IPR001461); BEST Arabidopsis…	protein	Aspartyl protease	Convencional Secreted (SignP)	Apoplastic	>tr|K4AXP0|K4AXP0_SOLLC Uncharacterized protein OS=Solanum lycopersicum PE=3 SV=1
5.5	6.52688	5.5	6.31256	6.69345	6.39058	5.5	6.68396							39	2	3	3	14.4	47	437	0	8.8564	67966000	3775900	278890	661170	69798	919260	807880	334720	196680	507510	0.404221	0.805697	0.357138	0.257074	K4AXP3;K4AXP1	K4AXP3	K4AXP3	'29.5.4'	'protein.degradation.aspartate protease'	'(at1g03220 : 407.0) Eukaryotic aspartyl protease family protein; FUNCTIONS IN: aspartic-type endopeptidase activity; INVOLVED IN: response to salt stress; LOCATED IN: cell wall, plasma membrane, membrane, plant-type cell wall; EXPRESSED IN: 6 plant structures; CONTAINS InterPro DOMAIN/s: Peptidase aspartic (InterPro:IPR021109), Peptidase aspartic, catalytic (InterPro:IPR009007), Peptidase A1 (In…	protein	Aspartyl protease	Convencional Secreted (SignP)	Apoplastic	>tr|K4AXP3|K4AXP3_SOLLC Uncharacterized protein OS=Solanum lycopersicum PE=3 SV=1
7.22131	6.82157	6.86923	7.38434	7.19816	6.8068	7.30705	6.47406							42	3	3	3	15	25.598	226	0	6.951	280840000	28084000	2723600	4135100	4070700	7584700	3099200	1868900	4242700	358820	0.217579	0.963883	-0.127596	-0.103361	K4AXX2;K4AXX3;K4B2W8	K4AXX2	K4AXX2	'20.1'	'stress.biotic'	(at2g15220 : 285.0) Plant basic secretory protein (BSP) family protein; INVOLVED IN: defense response; LOCATED IN: endomembrane system; EXPRESSED DURING: seedling growth; CONTAINS InterPro DOMAIN/s: Uncharacterised protein family, basic secretory protein (InterPro:IPR007541); BEST Arabidopsis thaliana protein match is: Plant basic secretory protein (BSP) family protein (TAIR:AT2G15130.1); Has 296…	stress response	BSP family protein	Convencional Secreted (SignP)	Apoplastic	>tr|K4AXX2|K4AXX2_SOLLC Uncharacterized protein OS=Solanum lycopersicum PE=4 SV=1
7.978	7.15878	5.5	7.00199	7.14625	6.97781	5.5	7.04583							43	1	4	4	13.4	47.604	425	0	52.219	364100000	30341000	6771200	5753300	371140	5778000	5413300	3634300	900330	1719800	0.141948	0.913701	-0.242221	-0.147025	K4AY49	K4AY49	K4AY49	'29.5'	protein.degradation'	'(at1g55360 : 617.0) Protein of Unknown Function (DUF239); INVOLVED IN: biological_process unknown; LOCATED IN: endomembrane system; EXPRESSED IN: 22 plant structures; EXPRESSED DURING: 13 growth stages; CONTAINS InterPro DOMAIN/s: Protein of unknown function DUF239, plant (InterPro:IPR004314); BEST Arabidopsis thaliana protein match is: Protein of Unknown Function (DUF239) (TAIR:AT3G13510.1); Ha…	protein	Unknown protein	Convencional Secreted (SignP)	Apoplastic	>tr|K4AY49|K4AY49_SOLLC Uncharacterized protein OS=Solanum lycopersicum PE=4 SV=1
5.5	6.23598	5.5	6.32064	6.36035	6.55472	6.26411	6.5217							45	1	3	3	21	20.605	186	0	6.832	45094000	4509400	121390	398890	107930	686030	784480	1043600	442460	924580	1.19974	0.913647	0.536062	0.433878	K4AYP9	K4AYP9	K4AYP9	'26.18'	'misc.invertase/pectin methylesterase inhibitor family protein'	(at5g46940 : 96.7) Plant invertase/pectin methylesterase inhibitor superfamily protein; FUNCTIONS IN: enzyme inhibitor activity, pectinesterase inhibitor activity, pectinesterase activity; INVOLVED IN: biological_process unknown; LOCATED IN: endomembrane system; EXPRESSED IN: 6 plant structures; EXPRESSED DURING: 4 anthesis, petal differentiation and expansion stage; CONTAINS InterPro DOMAIN/s: P…	cell wall	Invertase/pectin methylesterase inhibitor	Convencional Secreted (SignP)	Apoplastic	>tr|K4AYP9|K4AYP9_SOLLC Uncharacterized protein OS=Solanum lycopersicum PE=4 SV=1
6.15712	7.16991	6.16044	6.27955	5.99909	6.25462	6.24167	5.5							46	2	2	2	9.7	15.679	144	0	5.8631	86847000	10856000	213320	5398600	281590	1607700	484770	1706000	1108800	55052	0.716581	0.777053	-0.442911	-0.340341	P47921;K4AYT8	P47921;K4AYT8	P47921	'23.4.10'	'nucleotide metabolism.phosphotransfer and pyrophosphatases.nucleoside diphosphate kinase'	'(q9m7p6|ndk_capan : 270.0) Nucleoside diphosphate kinase (EC 2.7.4.6) (NDK) (NDP kinase) - Capsicum annuum (Bell pepper) & (at4g09320 : 245.0) nucleoside diphosphate kinase type 1 (NDPK1) gene, complete; NDPK1; FUNCTIONS IN: nucleoside diphosphate kinase activity, ATP binding; INVOLVED IN: response to cadmium ion, response to salt stress; LOCATED IN: apoplast, peroxisome, chloroplast, plasma mem…	metabolism	Nucleoside diphosphate kinase (Fragment)	Non-Secreted	Non-apoplastic	>sp|P47921|NDK_SOLLC Nucleoside diphosphate kinase (Fragment) OS=Solanum lycopersicum PE=2 SV=1;>tr|K4AYT8|K4AYT8_SOLLC Nucleoside diphosphate kinase OS=Solanum lycopersicum PE=3 SV=1
7.13082	7.18633	7.08529	7.14613	6.89485	7.17889	7.1648	7.45968							47	1	3	3	22.2	19.383	189	0	48.639	590930000	147730000	4328600	25184000	8759200	33146000	15894000	21855000	18567000	19997000	0.118947	1	0.0374117	0.0334865	K4AYV3	K4AYV3	K4AYV3	'26.19'	'misc.plastocyanin-like'	'(at3g60280 : 108.0) Encodes blue copper-binding protein III.; uclacyanin 3 (UCC3); FUNCTIONS IN: electron carrier activity, copper ion binding; LOCATED IN: anchored to membrane; EXPRESSED IN: flower; EXPRESSED DURING: petal differentiation and expansion stage; CONTAINS InterPro DOMAIN/s: Plastocyanin-like (InterPro:IPR003245), Cupredoxin (InterPro:IPR008972); BEST Arabidopsis thaliana protein ma…	redox	Cupredoxin	Convencional Secreted (SignP)	Apoplastic	>tr|K4AYV3|K4AYV3_SOLLC Uncharacterized protein OS=Solanum lycopersicum PE=4 SV=1
7.90974	7.99335	8.10473	8.39326	8.17516	8.28427	8.2625	8.56229							49	1	9	9	30.7	43.073	414	0	80.236	3659300000	243950000	13436000	46640000	22468000	34847000	25759000	29562000	33501000	37739000	0.817007	0.837126	0.220788	0.194572	K4AZ93	K4AZ93	K4AZ93	'10.5.1.1'	'cell wall.cell wall proteins.AGPs.AGP'	'(at3g60900 : 355.0) FASCICLIN-like arabinogalactan-protein 10 (FLA10); LOCATED IN: anchored to plasma membrane, plasma membrane, anchored to membrane; EXPRESSED IN: 17 plant structures; EXPRESSED DURING: 8 growth stages; CONTAINS InterPro DOMAIN/s: FAS1 domain (InterPro:IPR000782); BEST Arabidopsis thaliana protein match is: FASCICLIN-like arabinogalactan protein 8 (TAIR:AT2G45470.1); Has 12874 …	cell wall	FASCICLIN-like arabinogalactan-protein	Convencional Secreted (SignP)	Apoplastic	>tr|K4AZ93|K4AZ93_SOLLC Uncharacterized protein OS=Solanum lycopersicum PE=4 SV=1
9.29526	8.91108	8.53173	8.77045	8.97071	8.83423	8.71829	9.30179							51	1	13	13	31.2	47.719	443	0	76.737	19118000000	1194800000	136450000	161360000	44525000	164210000	258790000	148490000	98781000	182240000	0.148085	0.988149	0.0791216	0.0657335	K4B033	K4B033	K4B033	'27.3.67'	'RNA.regulation of transcription.putative transcription regulator'	'(at3g54400 : 479.0) Eukaryotic aspartyl protease family protein; FUNCTIONS IN: aspartic-type endopeptidase activity; INVOLVED IN: proteolysis; LOCATED IN: apoplast, cell wall, chloroplast, plant-type cell wall; EXPRESSED IN: 21 plant structures; EXPRESSED DURING: 14 growth stages; CONTAINS InterPro DOMAIN/s: Peptidase aspartic (InterPro:IPR021109), Peptidase aspartic, catalytic (InterPro:IPR0090…	DNA/RNA	Aspartyl protease	Convencional Secreted (SignP)	Non-apoplastic	>tr|K4B033|K4B033_SOLLC Uncharacterized protein OS=Solanum lycopersicum PE=3 SV=1
6.57123	6.7137	6.53543	6.56117	6.50442	6.5716	6.56896	6.68934							52	1	4	1	6.3	72.641	662	0	4.2329	88088000	3262500	198780	686250	201590	581410	461810	467750	376760	288190	0.0762108	0.990721	-0.0118022	-0.0111801	K4B088	K4B088	K4B088	'10.6.1'	'cell wall.degradation.cellulases and beta -1,4-glucanases'	(at5g04885 : 978.0) Glycosyl hydrolase family protein; FUNCTIONS IN: hydrolase activity, hydrolyzing O-glycosyl compounds; INVOLVED IN: carbohydrate metabolic process; LOCATED IN: plasma membrane, anchored to membrane; EXPRESSED IN: 7 plant structures; CONTAINS InterPro DOMAIN/s: Glycoside hydrolase, family 3, N-terminal (InterPro:IPR001764), Glycoside hydrolase, family 3, C-terminal (InterPro:IP…	cell wall	Glycosyl hydrolase	Convencional Secreted (SignP)	Non-apoplastic	>tr|K4B088|K4B088_SOLLC Uncharacterized protein OS=Solanum lycopersicum PE=4 SV=1
7.44531	7.25705	7.50376	7.4729	7.12359	7.14622	7.45793	6.45197							53	1	5	5	25.3	31.147	293	0	7.6877	476300000	34021000	2151700	4768100	4564700	9225500	4229000	3328500	5417400	336610	0.860597	0.799043	-0.37483	-0.307485	K4B0D3	K4B0D3	K4B0D3	'1.3.10'	'PS.calvin cycle.Rib5P Isomerase'	(at3g04790 : 327.0) Ribose 5-phosphate isomerase, type A protein; FUNCTIONS IN: ribose-5-phosphate isomerase activity; INVOLVED IN: defense response to bacterium, reductive pentose-phosphate cycle; LOCATED IN: thylakoid, chloroplast thylakoid membrane, chloroplast stroma, chloroplast, chloroplast envelope; EXPRESSED IN: 26 plant structures; EXPRESSED DURING: 14 growth stages; CONTAINS InterPro DO…	others	Ribose 5-phosphate isomerase	Leaderless Secreted	Non-apoplastic	>tr|K4B0D3|K4B0D3_SOLLC Uncharacterized protein OS=Solanum lycopersicum PE=3 SV=1
7.68436	8.07617	8.02621	8.25363	8.23591	8.01561	7.97338	7.96571							54	2	16	15	45.9	45.739	414	0	191.02	2689000000	141530000	6009400	27518000	15427000	22596000	27014000	19296000	16688000	6979100	0.10227	1	0.0375619	0.0330939	K4B0Q2;K4CAM0	K4B0Q2	K4B0Q2	'26.28'	'misc.GDSL-motif lipase'	(at1g54790 : 587.0) GDSL-like Lipase/Acylhydrolase superfamily protein; FUNCTIONS IN: hydrolase activity, acting on ester bonds, carboxylesterase activity; INVOLVED IN: lipid metabolic process; LOCATED IN: endomembrane system; EXPRESSED IN: 16 plant structures; EXPRESSED DURING: 8 growth stages; CONTAINS InterPro DOMAIN/s: Lipase, GDSL (InterPro:IPR001087); BEST Arabidopsis thaliana protein match…	metabolism	GDSL-like Lipase/Acylhydrolase	Leaderless Secreted	Non-apoplastic	>tr|K4B0Q2|K4B0Q2_SOLLC Uncharacterized protein OS=Solanum lycopersicum PE=4 SV=1
7.02547	7.20935	7.0754	7.26902	6.87492	6.97112	7.01565	6.46532							56	3	4	4	27.4	18.912	168	0	17.968	268450000	29828000	1931400	7069700	2206900	8685600	3808100	2935800	2800400	389940	1.19669	0.7704	-0.313059	-0.275132	K4B111;Q6DUX3;K4B112	K4B111;Q6DUX3;K4B112	K4B111	'33.99'	'development.unspecified'	'(p43349|tctp_soltu : 304.0) Translationally-controlled tumor protein homolog (TCTP) (p23) - Solanum tuberosum (Potato) & (at3g16640 : 258.0) Encodes a protein homologous to translationally controlled tumor protein (TCTP) from Drosophila. In flies, TCTP functions guanine nucleotide exchange factor in the TOR signaling pathway. TCTP is expressed throughout the plant with highest levels seen in mer…	others	Translationally-controlled tumor protein homolog	Non-Secreted	Non-apoplastic	>tr|K4B111|K4B111_SOLLC Uncharacterized protein OS=Solanum lycopersicum PE=3 SV=1;>sp|Q6DUX3|TCTP_SOLLC Translationally-controlled tumor protein homolog OS=Solanum lycopersicum GN=TCTP PE=2 SV=1;>tr|K4B112|K4B112_SOLLC Uncharacterized protein OS=Solanum ly
7.62264	7.68791	6.03575	6.63581	6.89504	7.792	5.97727	7.9611							57	1	6	6	33	23.231	206	0	24.84	693090000	53315000	4213800	14123000	307080	3289000	8102900	15535000	272820	7471200	0.096814	0.972091	0.160827	0.100028	K4B143	K4B143	K4B143	'30.2.25'	'signalling.receptor kinases.wall associated kinase'	'(at5g02070 : 123.0) Protein kinase family protein; FUNCTIONS IN: kinase activity; INVOLVED IN: protein amino acid phosphorylation; CONTAINS InterPro DOMAIN/s: Protein kinase, ATP binding site (InterPro:IPR017441), Protein kinase, catalytic domain (InterPro:IPR000719), Serine/threonine-protein kinase-like domain (InterPro:IPR017442), Protein kinase-like domain (InterPro:IPR011009), Serine/threoni…	signalling	Protein kinase	Convencional Secreted (SignP)	Non-apoplastic	>tr|K4B143|K4B143_SOLLC Uncharacterized protein OS=Solanum lycopersicum PE=4 SV=1
6.8709	7.12843	7.23119	7.47929	7.20126	7.01519	7.37436	6.78963							59	1	8	8	21.6	47.602	417	0	15.192	365130000	15214000	336230	1162400	1817600	3674700	2052000	1006400	4485400	679150	0.180723	0.992976	-0.0823408	-0.0699111	K4B172	K4B172	K4B172	'30.3'	'signalling.calcium'	'(q40401|calr_nicpl : 565.0) Calreticulin precursor - Nicotiana plumbaginifolia (Leadwort-leaved tobacco) & (at1g09210 : 522.0) Encodes one of three Arabidopsis calreticulins.; calreticulin 1b (CRT1b); FUNCTIONS IN: unfolded protein binding, calcium ion binding; INVOLVED IN: response to oxidative stress, response to salt stress; LOCATED IN: mitochondrion, endoplasmic reticulum, vacuole; EXPRESSED…	signalling	Calreticulin	Convencional Secreted (SignP)	Non-apoplastic	>tr|K4B172|K4B172_SOLLC Uncharacterized protein OS=Solanum lycopersicum PE=3 SV=1
7.78657	7.49283	7.50247	7.63293	7.6525	7.66188	7.51605	7.40104							61	1	3	3	11.9	29.21	268	0	7.6552	825420000	68785000	9924900	17788000	2902600	11378000	11194000	9078200	4742500	1777500	0.194967	1	-0.0458341	-0.0419486	K4B1G1	K4B1G1	K4B1G1	'35.2'	'not assigned.unknown'	'(at3g53010 : 278.0) Domain of unknown function (DUF303) ; FUNCTIONS IN: molecular_function unknown; INVOLVED IN: biological_process unknown; LOCATED IN: endomembrane system; CONTAINS InterPro DOMAIN/s: Protein of unknown function DUF303, acetylesterase putative (InterPro:IPR005181); BEST Arabidopsis thaliana protein match is: Domain of unknown function (DUF303) (TAIR:AT4G34215.2); Has 339 Blast …	not assigned	Putative acylesterase	Convencional Secreted (SignP)	Non-apoplastic	>tr|K4B1G1|K4B1G1_SOLLC Uncharacterized protein OS=Solanum lycopersicum PE=4 SV=1
7.7333	7.56584	5.5	7.37519	7.53241	5.5	7.21439	5.5							62	2	4	4	18.6	23.329	220	0	5.1803	854300000	94922000	9967300	21976000	6535700	15792000	9234400	10247000	5315500	15854000	0.345887	0.809371	-0.60688	-0.346226	K4B1G8;K4B1G7	K4B1G8;K4B1G7	K4B1G8	'15.2'	'metal handling.binding, chelation and storage'	(q9spv5|nec1_nicpl : 295.0) Nectarin-1 precursor (EC 1.15.1.1) (Superoxide dismutase [Mn]) - Nicotiana plumbaginifolia (Leadwort-leaved tobacco) & (at3g62020 : 265.0) germin-like protein (GLP10); germin-like protein 10 (GLP10); FUNCTIONS IN: manganese ion binding, nutrient reservoir activity; INVOLVED IN: biological_process unknown; LOCATED IN: cell wall, plant-type cell wall; EXPRESSED IN: 19 pl…	others	Germin-like protein	Convencional Secreted (SignP)	Apoplastic	>tr|K4B1G8|K4B1G8_SOLLC Uncharacterized protein OS=Solanum lycopersicum PE=3 SV=1;>tr|K4B1G7|K4B1G7_SOLLC Uncharacterized protein OS=Solanum lycopersicum PE=3 SV=1
8.08425	7.17678	5.5	7.13799	6.80996	7.13535	6.78379	8.09552							64	1	3	3	43	12.254	114	0	11.281	444160000	148050000	68754000	12114000	192640	16475000	10212000	10330000	1322800	28651000	0.141715	0.915737	0.231398	0.142887	K4B215	K4B215	K4B215	'26.19'	'misc.plastocyanin-like'	'(at2g02850 : 144.0) Encodes plantacyanin one of blue copper proteins. Involved in anther development and pollination. Expressed in the transmitting tract of the pistil.; plantacyanin (ARPN); FUNCTIONS IN: electron carrier activity, copper ion binding; INVOLVED IN: pollination, anther development; LOCATED IN: middle lamella-containing extracellular matrix, apoplast; EXPRESSED IN: 21 plant structu…	redox	Plastocyanin-like/Cupredoxin	Convencional Secreted (SignP)	Apoplastic	>tr|K4B215|K4B215_SOLLC Uncharacterized protein OS=Solanum lycopersicum PE=4 SV=1
7.92705	8.36931	8.28371	8.19388	8.07562	8.27182	8.32766	7.91261							65	2	17	17	27.5	85.206	778	0	133.43	4424900000	116440000	3438200	30136000	9803700	22229000	13382000	20626000	14044000	2786900	0.129753	1	-0.0465578	-0.0410245	K4B267;K4CZW8	K4B267	K4B267	'10.6.2'	'cell wall.degradation.mannan-xylose-arabinose-fucose'	(at5g64570 : 1039.0) Encodes a beta-d-xylosidase that belongs to family 3 of glycoside hydrolases.; beta-D-xylosidase 4 (XYL4); FUNCTIONS IN: xylan 1,4-beta-xylosidase activity, hydrolase activity, hydrolyzing O-glycosyl compounds; INVOLVED IN: xylan catabolic process; LOCATED IN: apoplast, cell wall; EXPRESSED IN: 24 plant structures; EXPRESSED DURING: 13 growth stages; CONTAINS InterPro DOMAIN/…	cell wall	Beta-d-xylosidase	Convencional Secreted (SignP)	Apoplastic	>tr|K4B267|K4B267_SOLLC Uncharacterized protein OS=Solanum lycopersicum PE=4 SV=1
7.46613	6.82244	6.70032	7.34132	6.61055	6.75202	6.57024	8.17							66	1	3	3	14	18.669	186	0	32.544	537880000	107580000	1668300	11287000	3439500	19486000	5057400	11104000	3960000	51574000	0.0464677	1	-0.05685	-0.0398279	K4B273	K4B273	K4B273	'26.21'	'misc.protease inhibitor/seed storage/lipid transfer protein (LTP) family protein'	(at2g13820 : 116.0) Bifunctional inhibitor/lipid-transfer protein/seed storage 2S albumin superfamily protein; FUNCTIONS IN: lipid binding; INVOLVED IN: lipid transport; LOCATED IN: anchored to plasma membrane, plasma membrane; EXPRESSED IN: 20 plant structures; EXPRESSED DURING: 13 growth stages; CONTAINS InterPro DOMAIN/s: Bifunctional inhibitor/plant lipid transfer protein/seed storage (InterP…	metabolism	Lipid-transfer protein	Convencional Secreted (SignP)	Apoplastic	>tr|K4B273|K4B273_SOLLC Uncharacterized protein OS=Solanum lycopersicum PE=3 SV=1
8.91357	8.25787	6.96452	8.62033	8.79109	8.42843	7.20112	9.08607							67	1	14	13	55.1	35.955	332	0	162.08	7993200000	470190000	76575000	39526000	986900	85230000	111130000	61987000	3514000	91241000	0.116955	0.948075	0.187605	0.117485	K4B277	K4B277	K4B277	'26.12'	'misc.peroxidases'	'(p22196|per2_arahy : 438.0) Cationic peroxidase 2 precursor (EC 1.11.1.7) (PNPC2) - Arachis hypogaea (Peanut) & (gnl|cdd|29388 : 428.0) no description available & (at5g64120 : 387.0) encodes a cell wall bound peroxidase that is induced by hypo-osmolarity; Peroxidase superfamily protein; FUNCTIONS IN: peroxidase activity; INVOLVED IN: defense response to fungus, N-terminal protein myristoylation,…	peroxidases	Peroxidase	Convencional Secreted (SignP)	Apoplastic	>tr|K4B277|K4B277_SOLLC Peroxidase OS=Solanum lycopersicum PE=3 SV=1
6.93078	6.84685	6.87683	7.25271	7.10085	6.81459	7.38408	6.13001							69	1	4	4	16.6	32.382	290	0	6.4293	272390000	22699000	810630	2887800	1983900	5977200	3539900	3014500	4360900	124180	0.16145	0.967114	-0.119408	-0.0929453	K4B2L1	K4B2L1	K4B2L1	'23.4.99'	'nucleotide metabolism.phosphotransfer and pyrophosphatases.misc'	(at5g09650 : 444.0) Encodes a protein with inorganic pyrophosphatase activity.; pyrophosphorylase 6 (PPa6); FUNCTIONS IN: inorganic diphosphatase activity, pyrophosphatase activity; INVOLVED IN: in 7 processes; LOCATED IN: thylakoid, chloroplast, chloroplast stroma, membrane, chloroplast envelope; EXPRESSED IN: 26 plant structures; EXPRESSED DURING: 14 growth stages; CONTAINS InterPro DOMAIN/s: I…	metabolism	Pyrophosphatase	Leaderless Secreted	Non-apoplastic	>tr|K4B2L1|K4B2L1_SOLLC Uncharacterized protein OS=Solanum lycopersicum PE=4 SV=1
8.2412	7.76109	6.94347	7.36708	7.92653	7.58807	7.28407	7.15906							70	1	8	8	28.8	41.548	382	0	41.352	1088900000	57310000	9351900	11441000	1501600	6213800	16883000	7845200	3029200	1044600	0.10002	0.985533	-0.0887754	-0.0669674	K4B2Y3	K4B2Y3	K4B2Y3	'30.8'	'signalling.misc'	(at2g15320 : 365.0) Leucine-rich repeat (LRR) family protein; CONTAINS InterPro DOMAIN/s: Leucine-rich repeat (InterPro:IPR001611); BEST Arabidopsis thaliana protein match is: Leucine-rich repeat (LRR) family protein (TAIR:AT5G66330.1); Has 72264 Blast hits to 25708 proteins in 980 species: Archae - 21; Bacteria - 3279; Metazoa - 16942; Fungi - 630; Plants - 47007; Viruses - 0; Other Eukaryotes -…	signalling	Leucine-rich repeat (LRR) family protein	Convencional Secreted (SignP)	Non-apoplastic	>tr|K4B2Y3|K4B2Y3_SOLLC Uncharacterized protein OS=Solanum lycopersicum PE=4 SV=1
5.5	5.5	5.5567	5.82071	5.5	5.5	6.03655	5.5							72	1	2	2	2.1	120.59	1072	0	3.1627	12819000	194220	0	40549	12787	32487	10112	45666	52620	0	0.0940073	1	0.0397855	0.0344618	K4B375	K4B375	K4B375	'29.5'	'protein.degradation'	'(at3g19170 : 1585.0) Zinc metalloprotease pitrilysin subfamily A. Signal peptide degrading enzyme targeted to mitochondria and chloroplasts. Expressed only in siliques and flowers; presequence protease 1 (PREP1); CONTAINS InterPro DOMAIN/s: Peptidase M16, C-terminal (InterPro:IPR007863), Peptidase M16C associated (InterPro:IPR013578), Peptidase M16, N-terminal (InterPro:IPR011765), Metalloenzyme…	protein	Protease	Non-Secreted	Non-apoplastic	>tr|K4B375|K4B375_SOLLC Uncharacterized protein OS=Solanum lycopersicum PE=4 SV=1
8.0732	8.19282	8.04759	8.29861	8.37989	8.19482	8.05755	8.0558							74	1	12	11	41.4	50.304	473	0	94.291	3947000000	197350000	8730800	31308000	12417000	43222000	43742000	30684000	17616000	9628000	0.0705915	1	0.0189583	0.0172977	K4B3H0	K4B3H0	K4B3H0	'26.4.1'	'misc.beta 1,3 glucan hydrolases.glucan endo-1,3-beta-glucosidase'	'(at4g34480 : 569.0) O-Glycosyl hydrolases family 17 protein; FUNCTIONS IN: cation binding, hydrolase activity, hydrolyzing O-glycosyl compounds, catalytic activity; INVOLVED IN: carbohydrate metabolic process; LOCATED IN: endomembrane system; EXPRESSED IN: 22 plant structures; EXPRESSED DURING: 13 growth stages; CONTAINS InterPro DOMAIN/s: X8 (InterPro:IPR012946), Glycoside hydrolase, catalytic …	stress response	Glucan endo-1,3-beta-glucosidase	Convencional Secreted (SignP)	Apoplastic	>tr|K4B3H0|K4B3H0_SOLLC Uncharacterized protein OS=Solanum lycopersicum PE=3 SV=1
6.52118	6.43881	6.47907	7.03615	6.4786	6.45687	6.57207	6.49324							75	2	4	3	18.4	34.665	326	0	38.011	107030000	5946400	165240	619070	293600	2369200	781700	598520	827040	291960	0.359873	0.972284	-0.118611	-0.10383	K4B3X5;K4D180	K4B3X5;K4D180	K4B3X5	'1.3.5'	'PS.calvin cycle.TPI'	(p48496|tpic_spiol : 510.0) Triosephosphate isomerase, chloroplast precursor (EC 5.3.1.1) (TIM) (Triose-phosphate isomerase) - Spinacia oleracea (Spinach) & (at2g21170 : 466.0) Encodes a plastidic triose phosphate isomerase. Mutants with reduced pdTPI levels have difficulty transitioning from heterotrophic to autotrophic growth. The related phenotypes, such as chlorosis in light-grown seedlings m…	others	Triosephosphate isomerase	Non-Secreted	Non-apoplastic	>tr|K4B3X5|K4B3X5_SOLLC Uncharacterized protein OS=Solanum lycopersicum PE=3 SV=1;>tr|K4D180|K4D180_SOLLC Uncharacterized protein OS=Solanum lycopersicum PE=3 SV=1
7.0812	6.74136	6.78044	6.80353	6.71116	6.57134	6.78421	5.5							76	1	5	5	8.2	87.681	801	0	11.025	135500000	3565800	284140	539880	308610	875760	854360	391070	279200	32753	0.723928	0.862875	-0.459957	-0.35102	K4B3Y3	K4B3Y3	K4B3Y3	'26.8'	'misc.nitrilases, *nitrile lyases, berberine bridge enzymes, reticuline oxidases, troponine reductases'	(at4g34880 : 484.0) Amidase family protein; FUNCTIONS IN: amidase activity, carbon-nitrogen ligase activity, with glutamine as amido-N-donor; INVOLVED IN: acrylonitrile catabolic process, aldoxime metabolic process; LOCATED IN: endomembrane system; EXPRESSED IN: root; CONTAINS InterPro DOMAIN/s: Amidase (InterPro:IPR000120); BEST Arabidopsis thaliana protein match is: Amidase family protein (TAIR…	metabolism	Amidase	Convencional Secreted (SignP)	Non-apoplastic	>tr|K4B3Y3|K4B3Y3_SOLLC Uncharacterized protein OS=Solanum lycopersicum PE=4 SV=1
6.79076	6.71124	6.62466	6.64847	6.62366	6.93992	7.12388	7.66796							77	1	4	4	13.3	37.241	345	0	3.4558	194670000	14975000	193260	1752700	498740	1046700	900000	1095700	2745300	6742300	0.901272	0.820683	0.395073	0.323285	K4B469	K4B469	K4B469	'35.1'	'not assigned.no ontology'	'(at2g17120 : 280.0) lysm domain GPI-anchored protein 2 precursor (LYM2); FUNCTIONS IN: molecular_function unknown; INVOLVED IN: cell wall macromolecule catabolic process; LOCATED IN: anchored to plasma membrane, plasma membrane, anchored to membrane; EXPRESSED IN: 24 plant structures; EXPRESSED DURING: 13 growth stages; CONTAINS InterPro DOMAIN/s: Peptidoglycan-binding lysin domain (InterPro:IPR…	not assigned	Peptidoglycan-binding lysin domain-containing protein	Convencional Secreted (SignP)	Apoplastic	>tr|K4B469|K4B469_SOLLC Uncharacterized protein OS=Solanum lycopersicum PE=4 SV=1
7.38292	7.46403	7.20898	7.07918	7.09156	7.20903	7.40732	6.828							78	1	8	8	15.2	60.692	541	0	11.196	438130000	12518000	676610	2661200	864990	1251600	3334800	1605400	2008500	114890	0.45246	0.909987	-0.149798	-0.1304	K4B533	K4B533	K4B533	'16.4.1'	'secondary metabolism.N misc.alkaloid-like'	'(at4g20840 : 592.0) FAD-binding Berberine family protein; FUNCTIONS IN: electron carrier activity, oxidoreductase activity, FAD binding, catalytic activity; LOCATED IN: apoplast, plasma membrane; EXPRESSED IN: 21 plant structures; EXPRESSED DURING: 10 growth stages; CONTAINS InterPro DOMAIN/s: FAD-binding, type 2 (InterPro:IPR016166), Berberine/berberine-like (InterPro:IPR012951), FAD linked oxi…	metabolism	FAD-binding protein	Convencional Secreted (SignP)	Non-apoplastic	>tr|K4B533|K4B533_SOLLC Uncharacterized protein OS=Solanum lycopersicum PE=4 SV=1
7.12189	7.35307	7.20022	7.47395	7.20809	7.20474	7.40016	7.26926							79	1	6	6	14.7	41.723	374	0	27.326	493600000	22437000	483370	3323300	1685300	5896800	3385400	3129100	3221500	1311800	0.065448	0.992676	-0.0167207	-0.0153275	K4B553	K4B553	K4B553	'7.3'	'OPP.electron transfer'	'(o04397|fenr2_tobac : 726.0) Ferredoxin--NADP reductase, root-type isozyme, chloroplast precursor (EC 1.18.1.2) (FNR) - Nicotiana tabacum (Common tobacco) & (at1g30510 : 610.0) Encodes a root-type ferredoxin:NADP(H) oxidoreductase.; root FNR 2 (RFNR2); FUNCTIONS IN: oxidoreductase activity, copper ion binding; INVOLVED IN: oxidation reduction; LOCATED IN: thylakoid membrane; EXPRESSED IN: 23 pla…	redox	Ferredoxin--NADP reductase	Leaderless Secreted	Non-apoplastic	>tr|K4B553|K4B553_SOLLC Ferredoxin--NADP reductase OS=Solanum lycopersicum PE=3 SV=1
7.20493	6.76933	7.14317	7.0419	7.39146	7.45411	7.58024	7.07449							80	2	6	6	29.7	28.519	263	0	18.248	457690000	38141000	1298400	1289300	2825800	4251000	8770900	9016000	9344100	1345800	1.22721	0.803294	0.335242	0.292952	K4B667;Q05537	K4B667;Q05537	K4B667	'20.1'	'stress.biotic'	'(gnl|cdd|84590 : 401.0) no description available & (p24091|chi2_tobac : 347.0) Endochitinase B precursor (EC 3.2.1.14) (CHN-B) - Nicotiana tabacum (Common tobacco) & (at3g12500 : 326.0) encodes a basic chitinase involved in ethylene/jasmonic acid mediated signalling pathway during systemic acquired resistance based on expression analyses.; basic chitinase (HCHIB); FUNCTIONS IN: chitinase activit…	stress response	Basic endochitinase	Convencional Secreted (SignP)	Apoplastic	>tr|K4B667|K4B667_SOLLC Uncharacterized protein OS=Solanum lycopersicum PE=3 SV=1;>sp|Q05537|CHID_SOLLC Basic endochitinase (Fragment) OS=Solanum lycopersicum GN=CHI14 PE=2 SV=1
8.21548	7.87558	7.20723	8.12444	8.10819	7.41996	7.25631	7.89631							81	8	13	12	55.8	35.449	326	0	141.83	1862000000	103440000	11879000	16650000	1417700	30577000	27869000	5755600	3151400	6143200	0.24988	0.910957	-0.185491	-0.14239	K4B6T2;K4BA79;K4CFF4;K4CFF3;K4CFF2;K4D4Y3;K4D4Y2;K4C2K8	K4B6T2	K4B6T2	'26.12'	'misc.peroxidases'	'(at2g41480 : 416.0) Peroxidase superfamily protein; FUNCTIONS IN: peroxidase activity, heme binding; INVOLVED IN: oxidation reduction, response to oxidative stress; EXPRESSED IN: root, leaf; EXPRESSED DURING: LP.04 four leaves visible; CONTAINS InterPro DOMAIN/s: Haem peroxidase (InterPro:IPR010255), Plant peroxidase (InterPro:IPR000823), Peroxidases heam-ligand binding site (InterPro:IPR019793)…	peroxidases	Peroxidase	Convencional Secreted (SignP)	Non-apoplastic	>tr|K4B6T2|K4B6T2_SOLLC Peroxidase OS=Solanum lycopersicum PE=3 SV=1
7.8983	8.06009	8.07733	8.06284	7.83645	8.13523	7.94671	7.8812							83	1	7	7	55	19.562	180	0	42.32	2553800000	255380000	9812100	49949000	22724000	52026000	32338000	48488000	28937000	11104000	0.424678	0.991581	-0.0747473	-0.0693254	K4B6X9	K4B6X9	K4B6X9	'20.2.99'	'stress.abiotic.unspecified'	'(q41495|st14_soltu : 284.0) STS14 protein precursor - Solanum tuberosum (Potato) & (at5g66590 : 186.0) CAP (Cysteine-rich secretory proteins, Antigen 5, and Pathogenesis-related 1 protein) superfamily protein; FUNCTIONS IN: molecular_function unknown; INVOLVED IN: biological_process unknown; LOCATED IN: endomembrane system, extracellular region; EXPRESSED IN: 22 plant structures; EXPRESSED DURIN…	stress response	STS14-like	Convencional Secreted (SignP)	Apoplastic	>tr|K4B6X9|K4B6X9_SOLLC Uncharacterized protein OS=Solanum lycopersicum PE=4 SV=1
6.57186	5.5	5.5	6.53619	5.5	5.96243	5.5	5.5							85	1	2	2	7.7	39.009	352	0	4.0015	37209000	2067200	189640	161390	79813	968990	237150	190360	115540	124310	0.596467	0.799378	-0.411405	-0.31036	K4B7P1	K4B7P1	K4B7P1	'29.5.3'	'protein.degradation.cysteine protease'	'(at1g02305 : 486.0) Cysteine proteinases superfamily protein; FUNCTIONS IN: cysteine-type endopeptidase activity, cysteine-type peptidase activity; INVOLVED IN: proteolysis, regulation of catalytic activity; LOCATED IN: vacuole; EXPRESSED IN: 23 plant structures; EXPRESSED DURING: 15 growth stages; CONTAINS InterPro DOMAIN/s: Peptidase C1A, papain (InterPro:IPR013128), Peptidase C1A, cathepsin B…	protein	Cysteine proteinase	Convencional Secreted (SignP)	Non-apoplastic	>tr|K4B7P1|K4B7P1_SOLLC Uncharacterized protein OS=Solanum lycopersicum PE=3 SV=1
5.5	5.5	5.5	6.49028	6.34663	6.37985	5.5	5.5							86	2	2	2	4.3	91.14	854	0	3.1188	65855000	2195200	70704	300640	99943	386030	401900	300450	173780	461720	0.208199	0.896384	0.184049	0.136198	K4B7U5;K4B564	K4B7U5;K4B564	K4B7U5	'29.5.1'	'protein.degradation.subtilases'	'(at4g20430 : 1062.0) Subtilase family protein; FUNCTIONS IN: identical protein binding, serine-type endopeptidase activity; INVOLVED IN: proteolysis, negative regulation of catalytic activity; LOCATED IN: endomembrane system; EXPRESSED IN: 19 plant structures; EXPRESSED DURING: 13 growth stages; CONTAINS InterPro DOMAIN/s: Peptidase S8/S53, subtilisin/kexin/sedolisin (InterPro:IPR000209), Peptid…	protein	Subtilase	Convencional Secreted (SignP)	Non-apoplastic	>tr|K4B7U5|K4B7U5_SOLLC Uncharacterized protein OS=Solanum lycopersicum PE=3 SV=1;>tr|K4B564|K4B564_SOLLC Uncharacterized protein OS=Solanum lycopersicum PE=3 SV=1
6.71162	7.12195	7.1669	7.0593	7.147	7.21069	7.23623	7.34753							87	1	10	9	13.6	95.059	841	0	22.141	343810000	9823100	186980	1594200	761440	1600900	1491000	1813000	1495400	880200	1.01897	0.820235	0.220418	0.198285	K4B7U9	K4B7U9	K4B7U9	'26.3.1'	'misc.gluco-, galacto- and mannosidases.alpha-galactosidase'	'(at5g11720 : 975.0) Glycosyl hydrolases family 31 protein; FUNCTIONS IN: hydrolase activity, hydrolyzing O-glycosyl compounds; INVOLVED IN: carbohydrate metabolic process; LOCATED IN: apoplast, vacuole, plant-type cell wall; EXPRESSED IN: 23 plant structures; EXPRESSED DURING: 13 growth stages; CONTAINS InterPro DOMAIN/s: Glycoside hydrolase, family 31 (InterPro:IPR000322), Glycoside hydrolase, …	cell wall	Glycosyl hydrolase	Convencional Secreted (SignP)	Non-apoplastic	>tr|K4B7U9|K4B7U9_SOLLC Uncharacterized protein OS=Solanum lycopersicum PE=3 SV=1
5.5	6.06198	5.5	6.09715	6.4135	5.93653	5.5	5.5							91	1	2	2	7.4	41.645	380	0	8.0654	34790000	1932800	258110	304000	115170	378780	476410	216240	93512	90576	0.0615715	1	0.0477241	0.0374378	K4B8E7	K4B8E7	K4B8E7	'26.28'	'misc.GDSL-motif lipase'	'(at1g29670 : 360.0) GDSL-like Lipase/Acylhydrolase superfamily protein; FUNCTIONS IN: hydrolase activity, acting on ester bonds, carboxylesterase activity; INVOLVED IN: lipid metabolic process; LOCATED IN: apoplast, cell wall, chloroplast; EXPRESSED IN: 23 plant structures; EXPRESSED DURING: 14 growth stages; CONTAINS InterPro DOMAIN/s: Lipase, GDSL (InterPro:IPR001087); BEST Arabidopsis thalian…	metabolism	GDSL-like Lipase/Acylhydrolase	Convencional Secreted (SignP)	Apoplastic	>tr|K4B8E7|K4B8E7_SOLLC Uncharacterized protein OS=Solanum lycopersicum PE=4 SV=1
5.5	6.96928	5.5	7.11641	7.09405	7.55103	7.61771	7.55							93	1	2	2	10.7	38.251	345	0	35.455	470060000	39172000	339530	4210100	163650	5485300	4282000	11177000	9129300	4385400	1.36484	0.194	1.18178	0.808087	K4B8T1	K4B8T1	K4B8T1	'29.5.3'	'protein.degradation.cysteine protease'	'(at3g49340 : 316.0) Cysteine proteinases superfamily protein; FUNCTIONS IN: cysteine-type endopeptidase activity, cysteine-type peptidase activity; INVOLVED IN: proteolysis; EXPRESSED IN: 10 plant structures; EXPRESSED DURING: 9 growth stages; CONTAINS InterPro DOMAIN/s: Peptidase C1A, papain (InterPro:IPR013128), Proteinase inhibitor I29, cathepsin propeptide (InterPro:IPR013201), Peptidase C1A…	protein	Cysteine proteinase	Convencional Secreted (SignP)	Non-apoplastic	>tr|K4B8T1|K4B8T1_SOLLC Uncharacterized protein OS=Solanum lycopersicum PE=3 SV=1
6.73114	6.88229	6.90257	6.82474	6.79171	5.5	6.87522	5.5							94	1	3	3	5.1	70.635	628	0	5.3176	140650000	6393300	186680	1541100	721880	1407100	1090500	387100	1012000	46925	0.869506	0.977667	-0.668452	-0.481863	K4B989	K4B989	K4B989	'35.2'	'not assigned.unknown'	' (original description: Uncharacterized protein OS=Solanum lycopersicum PE=4 SV=1)'	not assigned	Unknown protein	Non-Secreted	Non-apoplastic	>tr|K4B989|K4B989_SOLLC Uncharacterized protein OS=Solanum lycopersicum PE=4 SV=1
8.04902	7.46482	8.19626	7.62788	7.41574	7.4134	7.8053	7.32201							96	18	12	11	30.1	59.396	548	0	118.63	1336500000	47734000	4976700	5878100	5060700	10379000	8860000	6301000	4477200	1800700	0.853799	0.776509	-0.34538	-0.287062	K4B9P3;K4B9P2;K4B9P1;K4AZ46;K4BHN9;K4B129;K4BIG2;K4CHA0;Q96576;K4AWN9;Q96575;P09607;K4CVB0;K4B0T1;K4C3U9;K4C0Z2;K4BN62;K4C2B4	K4B9P3;K4B9P2;K4B9P1	K4B9P3	'10.8.1'	'cell wall.pectin*esterases.PME'	'(at1g11580 : 613.0) methylesterase PCR A (PMEPCRA); FUNCTIONS IN: enzyme inhibitor activity, pectinesterase activity; INVOLVED IN: cell wall modification; LOCATED IN: cell wall, plasma membrane, plant-type cell wall; EXPRESSED IN: 25 plant structures; EXPRESSED DURING: 13 growth stages; CONTAINS InterPro DOMAIN/s: Pectinesterase, active site (InterPro:IPR018040), Pectin lyase fold/virulence fact…	cell wall	Pectinesterase	Leaderless Secreted	Apoplastic	>tr|K4B9P3|K4B9P3_SOLLC Pectinesterase OS=Solanum lycopersicum PE=4 SV=1;>tr|K4B9P2|K4B9P2_SOLLC Pectinesterase OS=Solanum lycopersicum PE=4 SV=1;>tr|K4B9P1|K4B9P1_SOLLC Pectinesterase OS=Solanum lycopersicum PE=4 SV=1
7.74398	7.50417	7.39702	7.83103	7.66881	7.36974	7.47254	7.34478							98	1	8	8	24.9	38.542	341	0	16.674	982290000	57782000	2765200	7133000	3751000	18926000	12398000	6007200	5249000	1552800	0.582047	0.913662	-0.155082	-0.137824	K4B9T4	K4B9T4	K4B9T4	'24.2'	'Biodegradation of Xenobiotics.lactoylglutathione lyase'	'(at1g11840 : 485.0) Encodes a glyoxalase I homolog ATGLX1.; glyoxalase I homolog (GLX1); FUNCTIONS IN: lactoylglutathione lyase activity, metal ion binding; INVOLVED IN: carbohydrate metabolic process; LOCATED IN: peroxisome; EXPRESSED IN: 25 plant structures; EXPRESSED DURING: 13 growth stages; CONTAINS InterPro DOMAIN/s: Glyoxalase I (InterPro:IPR004361), Glyoxalase I, conserved site (InterPro…	others	Lactoylglutathione lyase	Convencional Secreted (SignP)	Non-apoplastic	>tr|K4B9T4|K4B9T4_SOLLC Lactoylglutathione lyase OS=Solanum lycopersicum PE=3 SV=1
6.16979	6.42901	6.01271	6.48893	6.27416	6.33578	6.31245	5.5							99	2	2	2	7.6	39.099	367	0	10.919	53705000	3580300	72815	797520	137760	1235800	404240	483990	350240	97962	0.309176	0.907692	-0.169513	-0.137705	K4BA95;K4BFH1	K4BA95;K4BFH1	K4BA95	'21.1'	'redox.thioredoxin'	(gnl|cdd|35625 : 523.0) no description available & (at2g17420 : 500.0) NADPH-dependent thioredoxin reductase, major cytosolic isoform; NADPH-dependent thioredoxin reductase A (NTRA); FUNCTIONS IN: thioredoxin-disulfide reductase activity; INVOLVED IN: in 6 processes; LOCATED IN: cytosol, mitochondrial matrix; EXPRESSED IN: male gametophyte, guard cell, cultured cell, pollen tube, leaf; EXPRESSED …	redox	Thioredoxin reductase	Non-Secreted	Non-apoplastic	>tr|K4BA95|K4BA95_SOLLC Thioredoxin reductase OS=Solanum lycopersicum PE=3 SV=1;>tr|K4BFH1|K4BFH1_SOLLC Thioredoxin reductase OS=Solanum lycopersicum PE=3 SV=1
7.11271	7.64596	7.48157	7.55062	7.54406	7.75217	7.66653	8.1473							100	1	6	6	12.4	58.093	539	0	96.404	1141700000	71356000	1521600	10645000	2477000	11811000	9865000	12594000	9071100	13372000	0.964744	0.801857	0.3298	0.280682	K4BAL4	K4BAL4	K4BAL4	'29.5.4'	'protein.degradation.aspartate protease'	'(at2g17760 : 523.0) Eukaryotic aspartyl protease family protein; FUNCTIONS IN: aspartic-type endopeptidase activity; INVOLVED IN: proteolysis; LOCATED IN: anchored to membrane; EXPRESSED IN: 22 plant structures; EXPRESSED DURING: 13 growth stages; CONTAINS InterPro DOMAIN/s: Peptidase aspartic (InterPro:IPR021109), Peptidase aspartic, catalytic (InterPro:IPR009007), Peptidase A1 (InterPro:IPR001…	protein	Aspartyl protease	Convencional Secreted (SignP)	Apoplastic	>tr|K4BAL4|K4BAL4_SOLLC Uncharacterized protein OS=Solanum lycopersicum PE=3 SV=1
7.32362	7.37256	7.04497	7.22008	7.19595	7.3137	7.24284	7.35818							102	1	4	4	9.8	33.666	326	0	2.7756	436850000	62407000	3560900	9355500	1382100	12247000	9966800	13966000	6475500	5453800	0.179957	1	0.0373592	0.0345609	K4BAP4	K4BAP4	K4BAP4	'20.1'	'stress.biotic'	'(at4g38660 : 301.0) Pathogenesis-related thaumatin superfamily protein; CONTAINS InterPro DOMAIN/s: Thaumatin, pathogenesis-related (InterPro:IPR001938); BEST Arabidopsis thaliana protein match is: THAUMATIN-LIKE PROTEIN 1 (TAIR:AT4G24180.1); Has 1636 Blast hits to 1618 proteins in 187 species: Archae - 0; Bacteria - 43; Metazoa - 60; Fungi - 87; Plants - 1419; Viruses - 4; Other Eukaryotes - 23…	stress response	Thaumatin-like protein	Convencional Secreted (SignP)	Apoplastic	>tr|K4BAP4|K4BAP4_SOLLC Uncharacterized protein OS=Solanum lycopersicum PE=4 SV=1
7.07886	7.23679	7.27978	7.35154	7.13516	7.08899	7.12772	7.12665							104	2	6	6	19.7	41.603	370	0	13.145	337920000	16092000	990470	1735900	1932100	4457800	1552600	2476600	1794600	1151700	1.03261	0.971753	-0.117112	-0.110626	K4BAP9;K4B6A3	K4BAP9	K4BAP9	'1.1.5.3'	'PS.lightreaction.other electron carrier (ox/red).ferredoxin reductase'	'(o04977|fenr1_tobac : 608.0) Ferredoxin--NADP reductase, leaf-type isozyme, chloroplast precursor (EC 1.18.1.2) (FNR) - Nicotiana tabacum (Common tobacco) & (at1g20020 : 513.0) Encodes a leaf-type ferredoxin:NADP(H) oxidoreductase. It is present in both chloroplast stroma and thylakoid membranes but is more abundant in the stroma; LEAF FNR 2 (ATLFNR2); FUNCTIONS IN: oxidoreductase activity, poly…	others	Ferredoxin--NADP reductase	Non-Secreted	Non-apoplastic	>tr|K4BAP9|K4BAP9_SOLLC Ferredoxin--NADP reductase OS=Solanum lycopersicum PE=3 SV=1
6.43348	6.60619	6.79111	6.73724	6.60552	6.70897	6.71098	6.269							105	2	4	4	16.6	42.397	392	0	10.126	112220000	5343600	152010	787180	422270	1538400	618110	947580	796720	81321	0.206711	0.991964	-0.068388	-0.0604475	K4BAW0;K4B6C3	K4BAW0	K4BAW0	'1.3.6'	'PS.calvin cycle.aldolase'	'(at4g38970 : 676.0) Protein is tyrosine-phosphorylated and its phosphorylation state is modulated in response to ABA in Arabidopsis thaliana seeds.; fructose-bisphosphate aldolase 2 (FBA2); FUNCTIONS IN: fructose-bisphosphate aldolase activity, catalytic activity; INVOLVED IN: response to cadmium ion, pentose-phosphate shunt, response to abscisic acid stimulus; LOCATED IN: in 6 components; EXPRE…	others	Fructose-bisphosphate aldolase	Non-Secreted	Non-apoplastic	>tr|K4BAW0|K4BAW0_SOLLC Fructose-bisphosphate aldolase OS=Solanum lycopersicum PE=3 SV=1
7.88387	6.40005	5.5	6.57755	6.71401	6.21466	6.43867	5.5							106	4	8	2	33.4	36.369	332	0	7.5224	177350000	9334100	3522900	1106500	34626	1659400	2249400	410000	236040	115190	0.278475	0.801227	-0.373533	-0.240071	K4BAZ3;K4B6D9;K4DD95;K4BFP3	K4BAZ3	K4BAZ3	'26.12'	'misc.peroxidases'	'(gnl|cdd|29388 : 456.0) no description available & (at5g66390 : 449.0) Peroxidase superfamily protein; FUNCTIONS IN: peroxidase activity, heme binding; INVOLVED IN: response to oxidative stress, oxidation reduction; LOCATED IN: endomembrane system; EXPRESSED IN: leaf apex, hypocotyl, root, flower; EXPRESSED DURING: 4 anthesis, petal differentiation and expansion stage; CONTAINS InterPro DOMAIN/s…	peroxidases	Peroxidase	Convencional Secreted (SignP)	Non-apoplastic	>tr|K4BAZ3|K4BAZ3_SOLLC Peroxidase OS=Solanum lycopersicum PE=3 SV=1
7.9527	7.16938	6.51355	7.35736	7.4681	6.95757	6.72781	6.72943							107	2	8	3	38.3	36.509	332	0	49.412	454090000	25227000	4879800	2539300	105510	6812600	7190000	1993600	1188000	518290	0.346372	0.852615	-0.277522	-0.20651	K4BAZ4;K4BFP1	K4BAZ4	K4BAZ4	'26.12'	'misc.peroxidases'	'(at5g66390 : 460.0) Peroxidase superfamily protein; FUNCTIONS IN: peroxidase activity, heme binding; INVOLVED IN: response to oxidative stress, oxidation reduction; LOCATED IN: endomembrane system; EXPRESSED IN: leaf apex, hypocotyl, root, flower; EXPRESSED DURING: 4 anthesis, petal differentiation and expansion stage; CONTAINS InterPro DOMAIN/s: Haem peroxidase (InterPro:IPR010255), Plant perox…	peroxidases	Peroxidase	Convencional Secreted (SignP)	Non-apoplastic	>tr|K4BAZ4|K4BAZ4_SOLLC Peroxidase OS=Solanum lycopersicum PE=3 SV=1
5.5	6.18645	6.09774	6.4481	6.04708	6.1283	6.1518	5.5							109	1	2	2	12.9	33.317	302	0	4.5709	34878000	2179900	20584	445460	168010	675790	254030	313350	283470	19183	0.153424	0.986256	-0.101278	-0.0808523	K4BB24	K4BB24	K4BB24	'3.5'	'minor CHO metabolism.others'	'(at5g66530 : 424.0) Galactose mutarotase-like superfamily protein; FUNCTIONS IN: carbohydrate binding, isomerase activity, aldose 1-epimerase activity, catalytic activity; INVOLVED IN: galactose metabolic process, carbohydrate metabolic process; EXPRESSED IN: 24 plant structures; EXPRESSED DURING: 13 growth stages; CONTAINS InterPro DOMAIN/s: Glycoside hydrolase-type carbohydrate-binding (InterP…	metabolism	Galactose mutarotase-like protein	Leaderless Secreted	Non-apoplastic	>tr|K4BB24|K4BB24_SOLLC Uncharacterized protein OS=Solanum lycopersicum PE=4 SV=1
7.97017	8.2005	8.78536	8.38646	9.10503	8.9606	9.03423	8.36888							111	1	14	14	60	38.77	345	0	103.58	15519000000	912890000	12059000	49093000	58593000	78353000	304750000	186070000	199060000	24911000	1.15652	0.855368	0.531565	0.428264	K4BBH7	K4BBH7	K4BBH7	'26.4.1'	'misc.beta 1,3 glucan hydrolases.glucan endo-1,3-beta-glucosidase'	(p52399|e13l_tobac : 419.0) Glucan endo-1,3-beta-glucosidase, acidic isoform GL153 precursor (EC 3.2.1.39) ((1->3)-beta-glucan endohydrolase) ((1->3)-beta-glucanase) (Beta-1,3-endoglucanase) - Nicotiana tabacum (Common tobacco) & (gnl|cdd|84700 : 384.0) no description available & (at4g16260 : 298.0) Glycosyl hydrolase superfamily protein; FUNCTIONS IN: cation binding, hydrolase activity, hydrolyz…	stress response	Glucan endo-1,3-beta-glucosidase	Convencional Secreted (SignP)	Apoplastic	>tr|K4BBH7|K4BBH7_SOLLC Uncharacterized protein OS=Solanum lycopersicum PE=3 SV=1
6.8	5.89511	5.5	5.5	5.89178	5.95071	5.5	5.5							112	1	3	3	13.7	36.361	328	0	9.918	23342000	1167100	250370	240670	0	100970	264260	246590	45353	18884	0.265804	0.893935	-0.213156	-0.160266	K4BBM6	K4BBM6	K4BBM6	'26.12'	'misc.peroxidases'	'(at5g40150 : 420.0) Peroxidase superfamily protein; FUNCTIONS IN: peroxidase activity, heme binding; INVOLVED IN: oxidation reduction, response to oxidative stress; LOCATED IN: endomembrane system; EXPRESSED IN: 21 plant structures; EXPRESSED DURING: 13 growth stages; CONTAINS InterPro DOMAIN/s: Haem peroxidase (InterPro:IPR010255), Plant peroxidase (InterPro:IPR000823), Peroxidases heam-ligand …	peroxidases	Peroxidase	Convencional Secreted (SignP)	Non-apoplastic	>tr|K4BBM6|K4BBM6_SOLLC Peroxidase OS=Solanum lycopersicum PE=3 SV=1
6.63811	6.5457	5.5	5.5	5.5	5.5	6.60532	5.5							114	1	2	2	11.5	29.446	270	0	24.513	86469000	7205800	363120	1264500	342950	2199000	863260	1083700	934720	154600	0.264192	0.835551	-0.269624	-0.189929	K4BBQ9	K4BBQ9	K4BBQ9	'20.1'	'stress.biotic'	'(at5g40020 : 328.0) Pathogenesis-related thaumatin superfamily protein; FUNCTIONS IN: molecular_function unknown; INVOLVED IN: response to other organism; LOCATED IN: endomembrane system; EXPRESSED IN: 13 plant structures; EXPRESSED DURING: 6 growth stages; CONTAINS InterPro DOMAIN/s: Thaumatin, pathogenesis-related (InterPro:IPR001938); BEST Arabidopsis thaliana protein match is: Pathogenesis-r…	stress response	Thaumatin-like protein	Convencional Secreted (SignP)	Apoplastic	>tr|K4BBQ9|K4BBQ9_SOLLC Uncharacterized protein OS=Solanum lycopersicum PE=4 SV=1
8.96694	8.94158	8.68737	8.94219	8.99982	9.02723	8.62642	9.13666							116	1	16	7	50.9	36.754	334	0	177.34	20560000000	1082100000	51566000	194970000	52688000	151190000	212760000	215390000	73218000	130330000	0.191808	1	0.0630133	0.0558052	K4BCJ4	K4BCJ4	K4BCJ4	'26.12'	'misc.peroxidases'	'(gnl|cdd|29388 : 445.0) no description available & (at1g49570 : 404.0) Peroxidase superfamily protein; FUNCTIONS IN: peroxidase activity, heme binding; INVOLVED IN: oxidation reduction, response to oxidative stress; LOCATED IN: endomembrane system; EXPRESSED IN: leaf lamina base, leaf whorl, hypocotyl, sepal, root; EXPRESSED DURING: 4 anthesis; CONTAINS InterPro DOMAIN/s: Haem peroxidase (InterP…	peroxidases	Peroxidase	Convencional Secreted (SignP)	Non-apoplastic	>tr|K4BCJ4|K4BCJ4_SOLLC Peroxidase OS=Solanum lycopersicum PE=3 SV=1
6.88333	7.58937	6.63433	7.45125	7.27168	7.10829	6.9101	5.5							117	1	13	4	45.8	36.843	334	0	19.572	447010000	22350000	356540	8050000	525480	5740000	4267600	1286200	2108400	16116	0.421618	0.79525	-0.44205	-0.301679	K4BCJ6	K4BCJ6	K4BCJ6	'26.12'	'misc.peroxidases'	'(gnl|cdd|29388 : 438.0) no description available & (at1g49570 : 400.0) Peroxidase superfamily protein; FUNCTIONS IN: peroxidase activity, heme binding; INVOLVED IN: oxidation reduction, response to oxidative stress; LOCATED IN: endomembrane system; EXPRESSED IN: leaf lamina base, leaf whorl, hypocotyl, sepal, root; EXPRESSED DURING: 4 anthesis; CONTAINS InterPro DOMAIN/s: Haem peroxidase (InterP…	peroxidases	Peroxidase	Convencional Secreted (SignP)	Apoplastic	>tr|K4BCJ6|K4BCJ6_SOLLC Peroxidase OS=Solanum lycopersicum PE=3 SV=1
7.20831	7.45953	6.34563	7.40188	7.92902	7.31877	6.57685	8.041							118	1	6	6	25.2	44.991	412	0	21.074	827710000	43564000	2683100	5918400	130200	9098000	15380000	3188200	227000	6939000	0.371185	0.803821	0.362573	0.254597	K4BCJ8	K4BCJ8	K4BCJ8	'33.1'	'development.storage proteins'	'(at4g37050 : 410.0) Patatin-related phospholipase A. Expressed in the floral gynaecium and is induced by abscisic acid (ABA) or phosphate deficiency in roots.; PATATIN-like protein 4 (PLP4); CONTAINS InterPro DOMAIN/s: Acyl transferase/acyl hydrolase/lysophospholipase (InterPro:IPR016035), Patatin (InterPro:IPR002641); BEST Arabidopsis thaliana protein match is: Acyl transferase/acyl hydrolase/l…	others	Patatin	Convencional Secreted (SignP)	Apoplastic	>tr|K4BCJ8|K4BCJ8_SOLLC Patatin OS=Solanum lycopersicum PE=3 SV=1
7.41644	6.65938	6.5804	6.54834	6.76995	6.72959	6.83091	6.40982							119	2	6	4	18.7	36.354	332	0	33.535	130150000	7230700	1631200	1358400	348900	753670	1419600	703590	830350	184970	0.202624	0.970527	-0.116075	-0.0946124	K4BD54;K4CCK2	K4BD54	K4BD54	'26.12'	'misc.peroxidases'	'(at4g37530 : 438.0) Peroxidase superfamily protein; FUNCTIONS IN: protein binding, peroxidase activity; INVOLVED IN: response to salt stress; LOCATED IN: endomembrane system; EXPRESSED IN: root; CONTAINS InterPro DOMAIN/s: Haem peroxidase (InterPro:IPR010255), Plant peroxidase (InterPro:IPR000823), Peroxidases heam-ligand binding site (InterPro:IPR019793), Haem peroxidase, plant/fungal/bacterial…	peroxidases	Peroxidase	Convencional Secreted (SignP)	Apoplastic	>tr|K4BD54|K4BD54_SOLLC Peroxidase OS=Solanum lycopersicum PE=3 SV=1
8.48279	8.90191	9.09262	8.83007	8.80438	8.89749	9.03571	9.14535							120	3	29	25	52.3	79.966	754	0	163.12	20027000000	572210000	13147000	95273000	64055000	86485000	81045000	85292000	86712000	60200000	0.434026	0.900308	0.14389	0.125353	K4BD63;K4BD64;K4B402	K4BD63	K4BD63	'29.5.1'	'protein.degradation.subtilases'	'(at5g67360 : 1066.0) Encodes a subtilisin-like serine protease essential for mucilage release from seed coats.; ARA12; FUNCTIONS IN: serine-type endopeptidase activity; INVOLVED IN: proteolysis, seed coat development, mucilage metabolic process involved seed coat development, mucilage extrusion from seed coat; LOCATED IN: extracellular region, apoplast, cell wall, plant-type cell wall; EXPRESSED…	protein	Subtilase	Convencional Secreted (SignP)	Non-apoplastic	>tr|K4BD63|K4BD63_SOLLC Uncharacterized protein OS=Solanum lycopersicum PE=4 SV=1
6.77882	6.84633	6.49067	6.88973	6.92292	6.87101	6.76236	6.50269							121	1	5	5	18.7	46.712	427	0	47.324	158530000	8343800	397150	1328900	263990	2127000	2061900	1317600	536590	310610	0.0355749	0.99173	0.0133538	0.0118207	K4BDB7	K4BDB7	K4BDB7	'30.6'	'signalling.MAP kinases'	(at5g67130 : 567.0) PLC-like phosphodiesterases superfamily protein; FUNCTIONS IN: phospholipase C activity, phosphoric diester hydrolase activity; INVOLVED IN: intracellular signaling pathway, lipid metabolic process; LOCATED IN: anchored to plasma membrane, plasma membrane; EXPRESSED IN: 23 plant structures; EXPRESSED DURING: 13 growth stages; CONTAINS InterPro DOMAIN/s: Phospholipase C, phosph…	signalling	PLC-like phosphodiesterase	Convencional Secreted (SignP)	Non-apoplastic	>tr|K4BDB7|K4BDB7_SOLLC Uncharacterized protein OS=Solanum lycopersicum PE=4 SV=1
6.65104	7.20211	7.17423	7.14019	7.13155	7.36864	7.21822	7.59869							122	2	4	4	7	45.449	412	0	44.328	424580000	19299000	636270	2847800	1355900	3190800	2596200	3658000	2552400	2461700	0.871693	0.79831	0.287384	0.246443	K4BDC7;K4B315	K4BDC7	K4BDC7	'30.6'	'signalling.MAP kinases'	(at4g36945 : 484.0) PLC-like phosphodiesterases superfamily protein; FUNCTIONS IN: phospholipase C activity, phosphoric diester hydrolase activity; INVOLVED IN: intracellular signaling pathway, lipid metabolic process; LOCATED IN: endomembrane system; CONTAINS InterPro DOMAIN/s: Phospholipase C, phosphatidylinositol-specific , X domain (InterPro:IPR000909), PLC-like phosphodiesterase, TIM beta/al…	signalling	Phosphodiesterase	Convencional Secreted (SignP)	Non-apoplastic	>tr|K4BDC7|K4BDC7_SOLLC Uncharacterized protein OS=Solanum lycopersicum PE=4 SV=1
8.04265	8.08615	8.04313	8.01064	8.1085	8.04661	7.99249	8.24976							124	1	12	12	46.2	35.385	325	0	87.401	2698500000	224880000	12052000	35276000	15515000	35116000	42467000	36454000	26544000	21452000	0.412253	1	0.053699	0.0507753	K4BDL3	K4BDL3	K4BDL3	'26.12'	'misc.peroxidases'	'(gnl|cdd|29388 : 396.0) no description available & (at4g37530 : 384.0) Peroxidase superfamily protein; FUNCTIONS IN: protein binding, peroxidase activity; INVOLVED IN: response to salt stress; LOCATED IN: endomembrane system; EXPRESSED IN: root; CONTAINS InterPro DOMAIN/s: Haem peroxidase (InterPro:IPR010255), Plant peroxidase (InterPro:IPR000823), Peroxidases heam-ligand binding site (InterPro:…	peroxidases	Peroxidase	Convencional Secreted (SignP)	Apoplastic	>tr|K4BDL3|K4BDL3_SOLLC Peroxidase OS=Solanum lycopersicum PE=3 SV=1
6.69264	6.61125	6.28542	6.43906	6.47685	6.66518	7.06427	5.5							125	1	2	2	4.9	38.626	346	0	4.1958	109460000	6081300	387070	1101000	163270	579800	640870	1257700	1369500	582040	0.0846338	0.985094	-0.0805203	-0.0598911	K4BE44	K4BE44	K4BE44	'29.5.3'	'protein.degradation.cysteine protease'	'(at3g49340 : 330.0) Cysteine proteinases superfamily protein; FUNCTIONS IN: cysteine-type endopeptidase activity, cysteine-type peptidase activity; INVOLVED IN: proteolysis; EXPRESSED IN: 10 plant structures; EXPRESSED DURING: 9 growth stages; CONTAINS InterPro DOMAIN/s: Peptidase C1A, papain (InterPro:IPR013128), Proteinase inhibitor I29, cathepsin propeptide (InterPro:IPR013201), Peptidase C1A…	protein	Cysteine proteinase	Convencional Secreted (SignP)	Non-apoplastic	>tr|K4BE44|K4BE44_SOLLC Uncharacterized protein OS=Solanum lycopersicum PE=3 SV=1
8.10326	8.0214	7.81753	7.71042	8.03981	7.57755	7.59163	7.11368							126	1	8	8	21.6	40.861	357	0	29.147	1560500000	104040000	12172000	27250000	7849600	13512000	25892000	8223200	7820100	1317800	0.785815	0.758623	-0.332483	-0.274873	K4BE45	K4BE45	K4BE45	'35.2'	'not assigned.unknown'	(at1g29050 : 494.0) Encodes a member of the TBL (TRICHOME BIREFRINGENCE-LIKE) gene family containing a plant-specific DUF231 (domain of unknown function) domain. TBL gene family has 46 members, two of which (TBR/AT5G06700 and TBL3/AT5G01360) have been shown to be involved in the synthesis and deposition of secondary wall cellulose, presumably by influencing the esterification state of pectic poly…	not assigned	Trichome birefringence-like protein	Convencional Secreted (SignP)	Non-apoplastic	>tr|K4BE45|K4BE45_SOLLC Uncharacterized protein OS=Solanum lycopersicum PE=4 SV=1
8.73458	8.55202	8.75918	8.39749	8.48522	8.40639	8.5907	8.38594							127	1	17	17	46.2	44.955	409	0	150.88	8405700000	400270000	30817000	69957000	47775000	49156000	68968000	50362000	63712000	19522000	0.726744	0.911676	-0.143754	-0.131081	K4BEV1	K4BEV1	K4BEV1	'3.8.2'	'minor CHO metabolism.galactose.alpha-galactosidases'	'(at5g08370 : 562.0) alpha-galactosidase 2 (AGAL2); FUNCTIONS IN: alpha-galactosidase activity, hydrolase activity, hydrolyzing O-glycosyl compounds, catalytic activity; INVOLVED IN: positive regulation of flower development, leaf morphogenesis; LOCATED IN: plant-type cell wall; EXPRESSED IN: 22 plant structures; EXPRESSED DURING: 13 growth stages; CONTAINS InterPro DOMAIN/s: Aldolase-type TIM ba…	metabolism	Alpha-galactosidase	Convencional Secreted (SignP)	Apoplastic	>tr|K4BEV1|K4BEV1_SOLLC Alpha-galactosidase OS=Solanum lycopersicum PE=3 SV=1
5.5	6.34661	6.52389	6.59547	5.851	6.20148	6.57819	5.5							128	2	3	3	17.4	22.653	207	0	15.583	51392000	3953300	32700	584450	575700	1343900	176740	384480	855260	0	0.24829	0.899433	-0.208825	-0.155534	K4BEX5;K4BEX6	K4BEX5;K4BEX6	K4BEX6	'35.2'	'not assigned.unknown'	' (original description: Uncharacterized protein OS=Solanum lycopersicum PE=4 SV=1)'	not assigned	Unknown protein	Convencional Secreted (SignP)	Apoplastic	>tr|K4BEX5|K4BEX5_SOLLC Uncharacterized protein OS=Solanum lycopersicum PE=4 SV=1;>tr|K4BEX6|K4BEX6_SOLLC Uncharacterized protein OS=Solanum lycopersicum PE=4 SV=1
7.15821	7.00393	7.06134	7.06689	7.06472	6.90912	7.30218	6.84424							129	2	6	6	27.5	34.377	320	0	27.878	253750000	16916000	1714400	4337100	1817100	1378900	3923700	671400	2968200	105710	0.152436	1	-0.0425296	-0.0384293	K4BF11;K4CG58	K4BF11	K4BF11	'26.12'	'misc.peroxidases'	'(gnl|cdd|29388 : 455.0) no description available & (at5g05340 : 387.0) Peroxidase superfamily protein; FUNCTIONS IN: protein binding, peroxidase activity; INVOLVED IN: response to oxidative stress, oxidation reduction; LOCATED IN: apoplast, cell wall; EXPRESSED IN: 9 plant structures; EXPRESSED DURING: LP.04 four leaves visible, 4 anthesis, C globular stage, petal differentiation and expansion s…	peroxidases	Peroxidase	Convencional Secreted (SignP)	Apoplastic	>tr|K4BF11|K4BF11_SOLLC Peroxidase OS=Solanum lycopersicum PE=3 SV=1
7.5133	7.84508	7.96011	7.76505	7.7168	7.76568	7.59315	8.04108							131	3	5	5	19	34.512	295	0	15.85	1327100000	94790000	5211100	14471000	12609000	15092000	13656000	14194000	9002700	10555000	0.021079	1	0.00829017	0.00731157	K4BFF2;K4CX68;K4B9N7	K4BFF2	K4BFF2	'10.7'	'cell wall.modification'	'(at1g11545 : 444.0) xyloglucan endotransglucosylase/hydrolase 8 (XTH8); FUNCTIONS IN: hydrolase activity, acting on glycosyl bonds, xyloglucan:xyloglucosyl transferase activity, hydrolase activity, hydrolyzing O-glycosyl compounds; INVOLVED IN: carbohydrate metabolic process, cellular glucan metabolic process; LOCATED IN: endomembrane system, cell wall, apoplast; EXPRESSED IN: 21 plant structure…	cell wall	Xyloglucan endotransglucosylase/hydrolase	Convencional Secreted (SignP)	Apoplastic	>tr|K4BFF2|K4BFF2_SOLLC Xyloglucan endotransglucosylase/hydrolase OS=Solanum lycopersicum PE=3 SV=1
7.02788	7.3805	7.35133	7.34844	7.3505	7.25047	7.41271	7.45618							132	1	8	8	22.2	53.517	477	0	29.741	548410000	20312000	207270	3491600	2078300	4107900	3694300	2961300	2701100	1069700	0.424994	0.989083	0.090428	0.0826159	K4BFN4	K4BFN4	K4BFN4	'29.5.5'	'protein.degradation.serine protease'	'(at4g36195 : 712.0) Serine carboxypeptidase S28 family protein; FUNCTIONS IN: serine-type peptidase activity; INVOLVED IN: proteolysis; EXPRESSED IN: guard cell; CONTAINS InterPro DOMAIN/s: Peptidase S28 (InterPro:IPR008758); BEST Arabidopsis thaliana protein match is: Serine carboxypeptidase S28 family protein (TAIR:AT4G36190.1). & (gnl|cdd|37393 : 388.0) no description available & (gnl|cdd|868…	protein	Serine carboxypeptidase	Convencional Secreted (SignP)	Non-apoplastic	>tr|K4BFN4|K4BFN4_SOLLC Uncharacterized protein OS=Solanum lycopersicum PE=4 SV=1
8.84638	8.61701	8.63891	8.61979	8.68541	8.37952	8.49132	8.27557							133	1	13	11	44.4	35.943	331	0	208.89	10006000000	555900000	46986000	105490000	43748000	107030000	121220000	55605000	55387000	20434000	1.12117	0.814707	-0.222568	-0.201643	K4BG30	K4BG30	K4BG30	'26.12'	'misc.peroxidases'	'(at4g37530 : 450.0) Peroxidase superfamily protein; FUNCTIONS IN: protein binding, peroxidase activity; INVOLVED IN: response to salt stress; LOCATED IN: endomembrane system; EXPRESSED IN: root; CONTAINS InterPro DOMAIN/s: Haem peroxidase (InterPro:IPR010255), Plant peroxidase (InterPro:IPR000823), Peroxidases heam-ligand binding site (InterPro:IPR019793), Haem peroxidase, plant/fungal/bacterial…	peroxidases	Peroxidase	Convencional Secreted (SignP)	Apoplastic	>tr|K4BG30|K4BG30_SOLLC Peroxidase OS=Solanum lycopersicum PE=3 SV=1
6.6486	8.08938	7.88655	7.71256	7.52907	7.99501	8.15259	7.06461							134	1	17	13	33.1	81.566	771	0	96.055	1806200000	51605000	87351	15017000	4743200	6397700	4165700	8496200	12255000	442370	0.0909671	0.99401	0.101045	0.0719497	K4BG34	K4BG34	K4BG34	'29.5.1'	'protein.degradation.subtilases'	'(at5g67360 : 981.0) Encodes a subtilisin-like serine protease essential for mucilage release from seed coats.; ARA12; FUNCTIONS IN: serine-type endopeptidase activity; INVOLVED IN: proteolysis, seed coat development, mucilage metabolic process involved seed coat development, mucilage extrusion from seed coat; LOCATED IN: extracellular region, apoplast, cell wall, plant-type cell wall; EXPRESSED …	protein	Subtilase	Convencional Secreted (SignP)	Apoplastic	>tr|K4BG34|K4BG34_SOLLC Uncharacterized protein OS=Solanum lycopersicum PE=4 SV=1
5.5	6.60887	6.68582	6.74027	6.48203	6.38943	6.44114	6.46706							139	3	3	3	25.9	11.643	112	0	3.192	85549000	12221000	239040	2969900	1301600	3341600	1767800	908240	1041200	651970	0.073987	1	0.0611771	0.0471861	K4C095;K4BHW5;K4CYX2	K4C095;K4BHW5;K4CYX2	K4BHW5	'26.21'	'misc.protease inhibitor/seed storage/lipid transfer protein (LTP) family protein'	'(at5g05960 : 132.0) Bifunctional inhibitor/lipid-transfer protein/seed storage 2S albumin superfamily protein; FUNCTIONS IN: lipid binding; INVOLVED IN: lipid transport; LOCATED IN: endomembrane system; EXPRESSED IN: 18 plant structures; EXPRESSED DURING: 10 growth stages; CONTAINS InterPro DOMAIN/s: Bifunctional inhibitor/plant lipid transfer protein/seed storage (InterPro:IPR016140), Plant lip…	metabolism	Lipid-transfer protein	Convencional Secreted (SignP)	Apoplastic	>tr|K4C095|K4C095_SOLLC Uncharacterized protein OS=Solanum lycopersicum PE=4 SV=1;>tr|K4BHW5|K4BHW5_SOLLC Uncharacterized protein OS=Solanum lycopersicum PE=4 SV=1;>tr|K4CYX2|K4CYX2_SOLLC Uncharacterized protein OS=Solanum lycopersicum PE=4 SV=1
6.51996	6.63014	6.67734	6.51026	6.46129	6.49678	6.55971	5.5							140	1	4	1	7.5	73.456	667	0	4.5328	75635000	2521200	146380	672610	331340	408270	314080	323600	259750	65160	0.612102	0.828387	-0.329982	-0.262798	K4BI68	K4BI68	K4BI68	20.2.1'	'stress.abiotic.heat'	(q03685|bip5_tobac : 1083.0) Luminal-binding protein 5 precursor (BiP 5) (78 kDa glucose-regulated protein homolog 5) (GRP 78-5) - Nicotiana tabacum (Common tobacco) & (gnl|cdd|35323 : 1074.0) no description available & (at5g42020 : 1043.0) Luminal binding protein (BiP2) involved in polar nuclei fusion during proliferation of endosperm nuclei.; luminal binding protein (BIP); FUNCTIONS IN: ATP bin…	stress response	Hsp 70 family protein	Convencional Secreted (SignP)	Non-apoplastic	>tr|K4BI68|K4BI68_SOLLC Uncharacterized protein OS=Solanum lycopersicum PE=3 SV=1
6.94797	7.36483	7.54207	7.32603	7.3704	7.38074	7.55305	7.65377							141	1	7	7	15	65.977	592	0	24.148	627130000	24120000	285940	3675200	2273100	3989100	3415000	3210000	3948700	3323500	0.653067	0.872235	0.194264	0.170005	K4BIG5	K4BIG5	K4BIG5	'26.7'	'misc.oxidases - copper, flavone etc'	'(at4g25240 : 803.0) Encodes GPI-anchored SKU5-like protein.; SKU5 similar 1 (SKS1); FUNCTIONS IN: oxidoreductase activity, copper ion binding; INVOLVED IN: oxidation reduction; LOCATED IN: anchored to plasma membrane, plasma membrane, anchored to membrane; EXPRESSED IN: 14 plant structures; EXPRESSED DURING: 6 growth stages; CONTAINS InterPro DOMAIN/s: Multicopper oxidase, type 3 (InterPro:IPR01…	redox	SKU5 similar	Convencional Secreted (SignP)	Apoplastic	>tr|K4BIG5|K4BIG5_SOLLC Uncharacterized protein OS=Solanum lycopersicum PE=4 SV=1
7.72217	8.39101	8.22175	8.14999	8.00647	8.15782	8.04009	8.15165							143	9	10	9	31.8	32.067	286	0	60.143	3114300000	259530000	9445900	45686000	33279000	38599000	38725000	41587000	31377000	20827000	0.078719	1	-0.0322253	-0.0280848	K4BII5;Q6RHY0;K4BII8;K4BII9;K4DHN4;K4CWS8;K4DCI9;Q43528;K4DD58	K4BII5;Q6RHY0;K4BII8;K4BII9	K4BII5	'10.6.2'	'cell wall.degradation.mannan-xylose-arabinose-fucose'	'(at4g25810 : 405.0) xyloglucan endotransglycosylase-related protein (XTR6); xyloglucan endotransglycosylase 6 (XTR6); FUNCTIONS IN: hydrolase activity, acting on glycosyl bonds, xyloglucan:xyloglucosyl transferase activity, hydrolase activity, hydrolyzing O-glycosyl compounds; INVOLVED IN: carbohydrate metabolic process, cellular glucan metabolic process; LOCATED IN: cell wall; EXPRESSED IN: 14 …	cell wall	Xyloglucan endotransglucosylase/hydrolase	Convencional Secreted (SignP)	Apoplastic	>tr|K4BII5|K4BII5_SOLLC Xyloglucan endotransglucosylase/hydrolase OS=Solanum lycopersicum PE=3 SV=1;>tr|Q6RHY0|Q6RHY0_SOLLC Xyloglucan endotransglucosylase/hydrolase OS=Solanum lycopersicum GN=XTH3 PE=2 SV=1;>tr|K4BII8|K4BII8_SOLLC Xyloglucan endotransgluc
7.60616	6.5917	5.5	6.50845	6.5097	6.39471	6.32451	6.6997							144	1	2	2	11.2	19.632	179	0.0024331	1.1361	134170000	26835000	5594800	5942500	367760	4671000	3971800	1972800	1116000	3198400	0.0558805	1	-0.0694203	-0.048276	K4BIL3	K4BIL3	K4BIL3	'35.1'	'not assigned.no ontology'	'(at4g39730 : 172.0) Lipase/lipooxygenase, PLAT/LH2 family protein; FUNCTIONS IN: molecular_function unknown; INVOLVED IN: biological_process unknown; LOCATED IN: thylakoid, chloroplast thylakoid membrane, plasma membrane, chloroplast, vacuole; EXPRESSED IN: 25 plant structures; EXPRESSED DURING: 13 growth stages; CONTAINS InterPro DOMAIN/s: Lipoxygenase, LH2 (InterPro:IPR001024), Lipase/lipooxyg…	not assigned	Lipase/lipooxygenase	Convencional Secreted (SignP)	Apoplastic	>tr|K4BIL3|K4BIL3_SOLLC Uncharacterized protein OS=Solanum lycopersicum PE=4 SV=1
5.5	5.5	6.38144	7.04289	7.00484	7.13903	6.98238	5.5							146	1	2	2	7.7	24.5	221	0	4.8738	180560000	22570000	162390	51322	78798	5414900	4958900	7426200	4477800	0	0.460302	0.875733	0.550479	0.357691	K4BJU1	K4BJU1	K4BJU1	'35.2'	'not assigned.unknown'	' (original description: Uncharacterized protein OS=Solanum lycopersicum PE=4 SV=1)'	not assigned	Unknown protein	Convencional Secreted (SignP)	Non-apoplastic	>tr|K4BJU1|K4BJU1_SOLLC Uncharacterized protein OS=Solanum lycopersicum PE=4 SV=1
5.5	6.10291	5.5	6.04763	5.5	5.99659	5.5	6.24942							148	1	2	2	2.9	71.591	659	0	2.6615	17574000	474970	0	108400	4389.4	125010	35666	81574	26668	93263	0.0328374	1	0.0238665	0.0190867	K4BK30	K4BK30	K4BK30	'30.2.3'	'signalling.receptor kinases.leucine rich repeat III'	'(at2g26730 : 515.0) Leucine-rich repeat protein kinase family protein; FUNCTIONS IN: protein serine/threonine kinase activity, protein kinase activity, ATP binding; INVOLVED IN: transmembrane receptor protein tyrosine kinase signaling pathway, protein amino acid phosphorylation; LOCATED IN: plasma membrane; EXPRESSED IN: 24 plant structures; EXPRESSED DURING: 13 growth stages; CONTAINS InterPro …	signalling	Leucine-rich repeat protein kinase	Convencional Secreted (SignP)	Non-apoplastic	>tr|K4BK30|K4BK30_SOLLC Uncharacterized protein OS=Solanum lycopersicum PE=4 SV=1
6.51825	6.77358	6.80009	6.72522	6.9462	6.6885	6.89379	6.96359							150	1	4	4	11	39.399	355	0	19.448	144730000	10338000	371960	1844900	799310	1411300	2012400	1464400	1232600	1200800	0.959624	0.8975	0.168734	0.15481	K4BKF6	K4BKF6	K4BKF6	'3.5'	'minor CHO metabolism.others'	'(at3g47800 : 473.0) Galactose mutarotase-like superfamily protein; FUNCTIONS IN: aldose 1-epimerase activity; INVOLVED IN: galactose metabolic process, hexose metabolic process, carbohydrate metabolic process; LOCATED IN: endomembrane system; EXPRESSED IN: 23 plant structures; EXPRESSED DURING: 14 growth stages; CONTAINS InterPro DOMAIN/s: Glycoside hydrolase-type carbohydrate-binding (InterPro:…	metabolism	Aldose 1-epimerase	Convencional Secreted (SignP)	Apoplastic	>tr|K4BKF6|K4BKF6_SOLLC Aldose 1-epimerase OS=Solanum lycopersicum PE=3 SV=1
5.5	5.5	5.5	5.74412	5.97795	5.89653	5.77565	5.5							152	1	3	3	11.7	48.976	454	0	14.68	14255000	750240	0	49605	41765	189560	118830	181320	103930	65219	0.957225	0.822082	0.226503	0.202057	K4BL06	K4BL06	K4BL06	'29.5.4'	'protein.degradation.aspartate protease'	'(at1g03220 : 401.0) Eukaryotic aspartyl protease family protein; FUNCTIONS IN: aspartic-type endopeptidase activity; INVOLVED IN: response to salt stress; LOCATED IN: cell wall, plasma membrane, membrane, plant-type cell wall; EXPRESSED IN: 6 plant structures; CONTAINS InterPro DOMAIN/s: Peptidase aspartic (InterPro:IPR021109), Peptidase aspartic, catalytic (InterPro:IPR009007), Peptidase A1 (In…	protein	Aspartyl protease	Convencional Secreted (SignP)	Apoplastic	>tr|K4BL06|K4BL06_SOLLC Uncharacterized protein OS=Solanum lycopersicum PE=3 SV=1
8.49646	8.04297	7.97798	7.94328	8.05873	8.05675	7.92333	8.26748							154	1	10	10	22.5	57.649	534	0	65.21	2814300000	122360000	12583000	21122000	7071700	17838000	22627000	17872000	10340000	12907000	0.095953	1	-0.0385997	-0.0336503	K4BMB8	K4BMB8	K4BMB8	'27.3.99'	'RNA.regulation of transcription.unclassified'	'(at3g18490 : 462.0) Eukaryotic aspartyl protease family protein; FUNCTIONS IN: aspartic-type endopeptidase activity; INVOLVED IN: proteolysis; EXPRESSED IN: 22 plant structures; EXPRESSED DURING: 14 growth stages; CONTAINS InterPro DOMAIN/s: Peptidase aspartic (InterPro:IPR021109), Peptidase aspartic, catalytic (InterPro:IPR009007), Peptidase A1 (InterPro:IPR001461), Peptidase aspartic, active s…	DNA/RNA	Aspartyl protease	Leaderless Secreted	Non-apoplastic	>tr|K4BMB8|K4BMB8_SOLLC Uncharacterized protein OS=Solanum lycopersicum PE=3 SV=1
5.5	6.86767	6.74838	6.84027	6.88377	6.88683	5.5	7.54641							156	1	2	2	2.8	97.317	886	0	39.095	241520000	5138600	195210	876250	205940	824500	973720	989610	349360	724040	0.151455	0.914229	0.215173	0.139458	K4BMW0	K4BMW0	K4BMW0	'30.2.18'	'signalling.receptor kinases.extensin'	'(at5g56890 : 676.0) Protein kinase superfamily protein; FUNCTIONS IN: protein serine/threonine kinase activity, protein kinase activity, kinase activity, ATP binding; INVOLVED IN: protein amino acid phosphorylation; LOCATED IN: plasma membrane; CONTAINS InterPro DOMAIN/s: Protein kinase, ATP binding site (InterPro:IPR017441), Serine/threonine-protein kinase domain (InterPro:IPR002290), Serine-th…	signalling	Protein kinase	Convencional Secreted (SignP)	Non-apoplastic	>tr|K4BMW0|K4BMW0_SOLLC Uncharacterized protein OS=Solanum lycopersicum PE=4 SV=1
6.263	6.435	6.5148	6.37136	6.4091	6.29598	6.81817	6.0811							158	2	2	2	4.4	64.52	565	0	2.4134	69969000	2332300	53262	441820	274110	385650	441210	220090	484010	32154	0.0103777	1	0.00504923	0.00433911	K4C757;K4BN88	K4C757;K4BN88	K4C757	'29.7.3'	'protein.glycosylation.mannosyl-oligosaccharide alpha-1,2-mannosidase'	'(at1g51590 : 759.0) Encodes an alpha-mannosidase I enzyme responsible for N-glycan maturation.; alpha-mannosidase 1 (MNS1); CONTAINS InterPro DOMAIN/s: Glycoside hydrolase, family 47 (InterPro:IPR001382); BEST Arabidopsis thaliana protein match is: alpha-mannosidase 2 (TAIR:AT3G21160.1); Has 35333 Blast hits to 34131 proteins in 2444 species: Archae - 798; Bacteria - 22429; Metazoa - 974; Fungi …	protein	alpha-1,2-Mannosidase	Non-Secreted	Non-apoplastic	>tr|K4C757|K4C757_SOLLC alpha-1,2-Mannosidase OS=Solanum lycopersicum PE=3 SV=1;>tr|K4BN88|K4BN88_SOLLC alpha-1,2-Mannosidase OS=Solanum lycopersicum PE=3 SV=1
6.60421	6.36741	5.5	5.5	5.5	5.5	5.5	5.5							160	3	2	2	8.8	23.481	215	0.0088889	0.81156	41027000	2413300	237660	544930	188120	424710	356200	115250	546480	0	0.858303	0.817037	-0.492904	-0.382495	K4DEV1;K4BNC2;K4BXJ9	K4DEV1;K4BNC2;K4BXJ9	K4DEV1	'7.1.3'	OPP.oxidative PP.6-phosphogluconate dehydrogenase'	(at3g02360 : 333.0) 6-phosphogluconate dehydrogenase family protein; FUNCTIONS IN: in 6 functions; INVOLVED IN: response to salt stress; LOCATED IN: peroxisome; EXPRESSED IN: 27 plant structures; EXPRESSED DURING: 16 growth stages; CONTAINS InterPro DOMAIN/s: 6-phosphogluconate dehydrogenase, NAD-binding (InterPro:IPR006115), 6-phosphogluconate dehydrogenase, C-terminal-like (InterPro:IPR008927),…	metabolism	6-phosphogluconate dehydrogenase	Non-Secreted	Non-apoplastic	>tr|K4DEV1|K4DEV1_SOLLC Uncharacterized protein OS=Solanum lycopersicum PE=4 SV=1;>tr|K4BNC2|K4BNC2_SOLLC 6-phosphogluconate dehydrogenase, decarboxylating OS=Solanum lycopersicum PE=3 SV=1;>tr|K4BXJ9|K4BXJ9_SOLLC Uncharacterized protein OS=Solanum lycoper
7.65063	7.57279	7.65042	7.50618	7.46914	7.53386	7.58842	7.92498							164	1	11	6	21.9	67.547	599	0	45.486	921590000	29729000	1703400	4316700	2392500	5142200	4368600	4243200	4109600	3452400	0.118247	1	0.0340943	0.0307879	K4BNM2	K4BNM2	K4BNM2	'26.3.1'	'misc.gluco-, galacto- and mannosidases.alpha-galactosidase'	'(at1g68560 : 903.0) Encodes a bifunctional alpha-l-arabinofuranosidase/beta-d-xylosidase that belongs to family 3 of glycoside hydrolases.; alpha-xylosidase 1 (XYL1); FUNCTIONS IN: xyloglucan 1,6-alpha-xylosidase activity, xylan 1,4-beta-xylosidase activity, alpha-N-arabinofuranosidase activity, hydrolase activity, hydrolyzing O-glycosyl compounds; INVOLVED IN: response to cadmium ion, xylan cat…	cell wall	Glycosyl hydrolase	Convencional Secreted (SignP)	Apoplastic	>tr|K4BNM2|K4BNM2_SOLLC Uncharacterized protein OS=Solanum lycopersicum PE=3 SV=1
5.5	7.24284	6.7649	7.09999	6.842	7.01903	6.88913	5.5							165	1	5	3	27.9	30.295	269	0	6.3062	259190000	21599000	148930	4920900	432780	5528800	2495000	4017300	2261000	1794700	0.0593002	0.993929	-0.0893918	-0.0583036	K4BNM3	K4BNM3	K4BNM3	'26.3.1'	'misc.gluco-, galacto- and mannosidases.alpha-galactosidase'	'(at1g68560 : 355.0) Encodes a bifunctional alpha-l-arabinofuranosidase/beta-d-xylosidase that belongs to family 3 of glycoside hydrolases.; alpha-xylosidase 1 (XYL1); FUNCTIONS IN: xyloglucan 1,6-alpha-xylosidase activity, xylan 1,4-beta-xylosidase activity, alpha-N-arabinofuranosidase activity, hydrolase activity, hydrolyzing O-glycosyl compounds; INVOLVED IN: response to cadmium ion, xylan cat…	cell wall	Alpha-l-arabinofuranosidase/beta-d-xylosidase	Leaderless Secreted	Non-apoplastic	>tr|K4BNM3|K4BNM3_SOLLC Uncharacterized protein OS=Solanum lycopersicum PE=3 SV=1
5.5	5.5	6.18988	5.5	5.5	6.31831	5.5	6.44567							167	1	2	2	5.9	54.638	505	0	1.4325	43619000	2907900	202400	642510	176640	514580	432430	406660	215750	316970	0.379131	0.831745	0.268524	0.205196	K4BNU8	K4BNU8	K4BNU8	'26.4.1'	'misc.beta 1,3 glucan hydrolases.glucan endo-1,3-beta-glucosidase'	'(at2g01630 : 651.0) O-Glycosyl hydrolases family 17 protein; FUNCTIONS IN: cation binding, hydrolase activity, hydrolyzing O-glycosyl compounds, catalytic activity; INVOLVED IN: carbohydrate metabolic process; LOCATED IN: plasma membrane, anchored to membrane; EXPRESSED IN: 21 plant structures; EXPRESSED DURING: 13 growth stages; CONTAINS InterPro DOMAIN/s: Glycoside hydrolase, catalytic core (I…	stress response	O-glycosyl hydrolase	Convencional Secreted (SignP)	Apoplastic	>tr|K4BNU8|K4BNU8_SOLLC Uncharacterized protein OS=Solanum lycopersicum PE=3 SV=1
7.63265	7.28726	7.67258	7.07335	7.24395	7.02967	7.42182	6.86633							169	1	9	7	25.8	46.965	418	0	42.396	491610000	22346000	1924700	4279900	3019600	2960600	4603700	1827200	3308400	421700	0.715802	0.811797	-0.276017	-0.232341	K4BP29	K4BP29	K4BP29	'3.8.2'	'minor CHO metabolism.galactose.alpha-galactosidases'	'(at5g08380 : 645.0) alpha-galactosidase 1 (AGAL1); FUNCTIONS IN: alpha-galactosidase activity, hydrolase activity, hydrolyzing O-glycosyl compounds, catalytic activity; INVOLVED IN: carbohydrate metabolic process, metabolic process, lactose catabolic process; LOCATED IN: apoplast, cell wall, plant-type cell wall; EXPRESSED IN: 21 plant structures; EXPRESSED DURING: 13 growth stages; CONTAINS Int…	metabolism	Alpha-galactosidase	Convencional Secreted (SignP)	Non-apoplastic	>tr|K4BP29|K4BP29_SOLLC Alpha-galactosidase OS=Solanum lycopersicum PE=3 SV=1
7.09646	6.75046	6.61399	6.81867	6.9409	6.70839	6.78861	7.32693							170	1	7	5	9.9	72.781	649	0	10.466	155640000	5366900	518300	801790	260070	418360	805920	532850	628610	1401000	0.297444	0.966918	0.121312	0.103617	K4BPB8	K4BPB8	K4BPB8	'26.3.1'	'misc.gluco-, galacto- and mannosidases.alpha-galactosidase'	'(at5g11720 : 922.0) Glycosyl hydrolases family 31 protein; FUNCTIONS IN: hydrolase activity, hydrolyzing O-glycosyl compounds; INVOLVED IN: carbohydrate metabolic process; LOCATED IN: apoplast, vacuole, plant-type cell wall; EXPRESSED IN: 23 plant structures; EXPRESSED DURING: 13 growth stages; CONTAINS InterPro DOMAIN/s: Glycoside hydrolase, family 31 (InterPro:IPR000322), Glycoside hydrolase, …	cell wall	Glycosyl hydrolase	Non-Secreted	Apoplastic	>tr|K4BPB8|K4BPB8_SOLLC Uncharacterized protein OS=Solanum lycopersicum PE=3 SV=1
6.18318	5.5	6.1919	5.5	5.5	5.5	6.10517	5.5							171	8	2	2	6.4	38.564	343	0	2.1479	14991000	749560	108300	141800	116750	95345	93755	68953	124650	0	0.328052	0.888215	-0.192478	-0.154036	K4BPJ4;K4D9M3;K4CQ71;K4AWS1;K4CV89;K4C2D7;K4DHW9;K4D426	K4BPJ4;K4D9M3;K4CQ71;K4AWS1;K4CV89;K4C2D7;K4DHW9;K4D426	K4BPJ4	'10.1.5'	'cell wall.precursor synthesis.UXS'	(at2g28760 : 611.0) UDP-XYL synthase 6 (UXS6); FUNCTIONS IN: coenzyme binding, binding, catalytic activity; INVOLVED IN: cellular metabolic process, nucleotide-sugar metabolic process, metabolic process; LOCATED IN: plasma membrane; EXPRESSED IN: 24 plant structures; EXPRESSED DURING: 13 growth stages; CONTAINS InterPro DOMAIN/s: NAD-dependent epimerase/dehydratase (InterPro:IPR001509), NAD(P)-bi…	cell wall	UDP-XYL synthase	Non-Secreted	Non-apoplastic	>tr|K4BPJ4|K4BPJ4_SOLLC Uncharacterized protein OS=Solanum lycopersicum PE=4 SV=1;>tr|K4D9M3|K4D9M3_SOLLC Uncharacterized protein OS=Solanum lycopersicum PE=4 SV=1;>tr|K4CQ71|K4CQ71_SOLLC Uncharacterized protein OS=Solanum lycopersicum PE=4 SV=1;>tr|K4AWS1
6.75844	7.06269	7.28226	6.86387	6.52204	6.8037	6.9017	6.39478							172	1	4	2	18.9	27.504	259	0	9.7767	203500000	15654000	997510	4653100	1794700	3077400	913390	1911400	2120100	186190	1.05353	0.799774	-0.336262	-0.28852	K4BPK4	K4BPK4	K4BPK4	'4.1.7'	'glycolysis.cytosolic branch.triosephosphate isomerase (TPI)'	(p48495|tpis_pethy : 376.0) Triosephosphate isomerase, cytosolic (EC 5.3.1.1) (TIM) (Triose-phosphate isomerase) - Petunia hybrida (Petunia) & (gnl|cdd|36856 : 356.0) no description available & (at3g55440 : 352.0) Encodes triosephosphate isomerase.; triosephosphate isomerase (TPI); FUNCTIONS IN: triose-phosphate isomerase activity, copper ion binding; INVOLVED IN: in 7 processes; LOCATED IN: in 8…	metabolism	Triosephosphate isomerase	Leaderless Secreted	Non-apoplastic	>tr|K4BPK4|K4BPK4_SOLLC Uncharacterized protein OS=Solanum lycopersicum PE=3 SV=1
6.79938	6.80036	6.81902	6.6514	6.84549	6.69511	6.7331	6.96901							174	1	4	4	12.2	53.911	493	0	3.2865	151620000	8423200	101110	540510	197510	412290	2407600	2276100	1456600	1031500	0.239621	1	0.0431389	0.0402053	K4BQ22	K4BQ22	K4BQ22	'35.1'	'not assigned.no ontology'	'(at4g17180 : 679.0) O-Glycosyl hydrolases family 17 protein; FUNCTIONS IN: cation binding, hydrolase activity, hydrolyzing O-glycosyl compounds, catalytic activity; INVOLVED IN: carbohydrate metabolic process; LOCATED IN: endomembrane system; EXPRESSED IN: 22 plant structures; EXPRESSED DURING: 13 growth stages; CONTAINS InterPro DOMAIN/s: X8 (InterPro:IPR012946), Glycoside hydrolase, catalytic …	not assigned	O-glycosyl hydrolase	Convencional Secreted (SignP)	Non-apoplastic	>tr|K4BQ22|K4BQ22_SOLLC Uncharacterized protein OS=Solanum lycopersicum PE=3 SV=1
7.25503	7.22606	7.46265	7.36042	7.35814	7.38394	7.36573	7.62401							175	1	10	8	20.2	68.707	625	0	12.967	559550000	23315000	752740	4318600	3693800	4428600	2331800	3110700	3440400	1237900	0.605093	0.972384	0.106916	0.098666	K4BQ58	K4BQ58	K4BQ58	'10.6.1'	'cell wall.degradation.cellulases and beta -1,4-glucanases'	'(at5g20950 : 887.0) Glycosyl hydrolase family protein; FUNCTIONS IN: hydrolase activity, hydrolyzing O-glycosyl compounds; INVOLVED IN: carbohydrate metabolic process; LOCATED IN: cell wall, membrane, plant-type cell wall; EXPRESSED IN: 25 plant structures; EXPRESSED DURING: 13 growth stages; CONTAINS InterPro DOMAIN/s: Glycoside hydrolase, family 3, N-terminal (InterPro:IPR001764), Glycoside hy…	cell wall	Glycosyl hydrolase	Convencional Secreted (SignP)	Apoplastic	>tr|K4BQ58|K4BQ58_SOLLC Uncharacterized protein OS=Solanum lycopersicum PE=4 SV=1
7.10911	6.86756	7.05192	7.0777	7.05477	7.00702	7.0642	6.88576							176	3	4	4	5	104.01	948	0	2.9617	237710000	5057600	375190	592600	394340	1056000	984020	714190	711740	229490	0.130682	1	-0.023635	-0.0221295	K4BQ85;K4D2I1;K4D2Q1	K4BQ85;K4D2I1	K4BQ85	'31.1.1.1.3'	'cell.organisation.cytoskeleton.actin.actin binding'	'(at2g41740 : 1177.0) Encodes a protein with high homology to animal villin.; villin 2 (VLN2); FUNCTIONS IN: actin binding, protein binding; INVOLVED IN: cytoskeleton organization; LOCATED IN: cellular_component unknown; EXPRESSED IN: 24 plant structures; EXPRESSED DURING: 15 growth stages; CONTAINS InterPro DOMAIN/s: Gelsolin (InterPro:IPR007122), Villin headpiece (InterPro:IPR003128), Gelsolin …	others	Villin homolog protein	Non-Secreted	Non-apoplastic	>tr|K4BQ85|K4BQ85_SOLLC Uncharacterized protein OS=Solanum lycopersicum PE=4 SV=1;>tr|K4D2I1|K4D2I1_SOLLC Uncharacterized protein OS=Solanum lycopersicum PE=4 SV=1
7.06959	7.27038	7.38036	7.81812	7.2316	7.56006	7.61554	7.1329							177	1	6	5	24.9	38.361	345	0	45.266	757870000	47367000	1008900	4064800	2811900	18081000	4818500	7551200	7400500	1629900	0.000693379	0.997923	0.000412941	0.000344652	K4BQE7	K4BQE7	K4BQE7	'26.4.1'	'misc.beta 1,3 glucan hydrolases.glucan endo-1,3-beta-glucosidase'	'(p36401|e13h_tobac : 537.0) Glucan endo-1,3-beta-glucosidase, acidic isoform PR-Q' precursor (EC 3.2.1.39) ((1->3)-beta-glucan endohydrolase) ((1->3)-beta-glucanase) (Beta-1,3-endoglucanase) (PR-35) - Nicotiana tabacum (Common tobacco) & (gnl|cdd|84700 : 380.0) no description available & (at3g57260 : 320.0) beta 1,3-glucanase; "beta-1,3-glucanase 2" (BGL2); FUNCTIONS IN: glucan 1,3-beta-glucosid…	stress response	Glucan endo-1,3-beta-glucosidase	Convencional Secreted (SignP)	Non-apoplastic	>tr|K4BQE7|K4BQE7_SOLLC Uncharacterized protein OS=Solanum lycopersicum PE=3 SV=1
7.13865	6.87744	6.4609	6.88231	6.5868	6.48111	6.91155	6.39648							178	1	3	3	5.8	63.451	583	0	17.637	146000000	4055500	367720	1140300	179660	930730	479730	411670	515600	30094	0.655669	0.861888	-0.245837	-0.208338	K4BRG8	K4BRG8	K4BRG8	'4.1.2'	'glycolysis.cytosolic branch.phosphoglucomutase (PGM)'	(q9m4g4|pgmc_soltu : 1150.0) Phosphoglucomutase, cytoplasmic (EC 5.4.2.2) (Glucose phosphomutase) (PGM) - Solanum tuberosum (Potato) & (at1g70730 : 982.0) Encodes a cytosolic phosphoglucomutase (PGM). Two Arabidopsis PGM proteins (AT1G70730/PGM2 and AT1G23190/PGM3) have high sequence similarities and redundant functions. Mature plants possessing a single cPGM allele had a major reduction in cPGM …	metabolism	Phosphoglucomutase	Non-Secreted	Non-apoplastic	>tr|K4BRG8|K4BRG8_SOLLC Uncharacterized protein OS=Solanum lycopersicum PE=3 SV=1
7.6283	7.68902	7.61297	7.68041	7.67519	7.77587	7.61846	8.30292							182	3	10	10	30.8	38.892	351	0	45.827	1446300000	90393000	3578200	13035000	3848100	14270000	12118000	15823000	9984800	17736000	0.563897	0.873854	0.190435	0.164478	K4BTH7;K4BTH6;REV__W9JWH8	K4BTH7	K4BTH7	'26.12'	'misc.peroxidases'	'(at1g71695 : 424.0) Peroxidase superfamily protein; FUNCTIONS IN: peroxidase activity, heme binding; INVOLVED IN: response to oxidative stress, oxidation reduction; LOCATED IN: cell wall, vacuole, membrane, plant-type cell wall; EXPRESSED IN: 23 plant structures; EXPRESSED DURING: 13 growth stages; CONTAINS InterPro DOMAIN/s: Haem peroxidase (InterPro:IPR010255), Plant peroxidase (InterPro:IPR00…	peroxidases	Peroxidase	Convencional Secreted (SignP)	Non-apoplastic	>tr|K4BTH7|K4BTH7_SOLLC Peroxidase OS=Solanum lycopersicum PE=3 SV=1
8.71462	8.53106	8.60547	8.55483	8.54763	8.33943	8.27492	8.25866							183	1	5	5	23.2	30.012	276	0	113.91	7936500000	992070000	93698000	162320000	111830000	162540000	200460000	144660000	82742000	33821000	1.70765	0.805463	-0.246334	-0.228512	K4BTI7	K4BTI7	K4BTI7	'20.1'	'stress.biotic'	'(at3g54420 : 347.0) encodes an EP3 chitinase that is expressed during somatic embryogenesis in 'nursing' cells surrounding the embryos but not in embryos themselves. The gene is also expressed in mature pollen and growing pollen tubes until they enter the receptive synergid, but not in endosperm and integuments as in carrot. Post-embryonically, expression is found in hydathodes, stipules, root e…	stress response	Chitinase	Convencional Secreted (SignP)	Apoplastic	>tr|K4BTI7|K4BTI7_SOLLC Uncharacterized protein OS=Solanum lycopersicum PE=3 SV=1
7.9724	8.05983	7.65816	7.97398	7.89954	8.06032	7.75022	7.84544							187	1	3	3	7.1	46.103	435	0	4.3872	1845700000	141980000	7544100	17646000	9378300	30185000	19052000	27613000	14595000	15961000	0.0902806	1	-0.0272124	-0.024523	K4BU57	K4BU57	K4BU57	'27.3.99'	'RNA.regulation of transcription.unclassified'	'(at1g09750 : 437.0) Eukaryotic aspartyl protease family protein; FUNCTIONS IN: aspartic-type endopeptidase activity; INVOLVED IN: proteolysis; LOCATED IN: apoplast, cell wall, plant-type cell wall; EXPRESSED IN: 22 plant structures; EXPRESSED DURING: 14 growth stages; CONTAINS InterPro DOMAIN/s: Peptidase aspartic (InterPro:IPR021109), Peptidase aspartic, catalytic (InterPro:IPR009007), Peptidas…	DNA/RNA	Aspartyl protease	Convencional Secreted (SignP)	Non-apoplastic	>tr|K4BU57|K4BU57_SOLLC Uncharacterized protein OS=Solanum lycopersicum PE=3 SV=1
6.42568	6.63034	6.56501	6.99403	6.48569	6.43374	6.43985	6.40916							188	1	4	4	7.8	74.184	650	0	7.931	102630000	3110100	93499	363090	272560	1151500	539070	312530	284590	93238	0.872688	0.802536	-0.211655	-0.188601	K4BUA1	K4BUA1	K4BUA1	'10.6.3'	'cell wall.degradation.pectate lyases and polygalacturonases'	'(at1g09890 : 825.0) Rhamnogalacturonate lyase family protein; CONTAINS InterPro DOMAIN/s: Rhamnogalacturonate lyase (InterPro:IPR010325), Carbohydrate-binding-like fold (InterPro:IPR013784), Galactose-binding domain-like (InterPro:IPR008979); BEST Arabidopsis thaliana protein match is: Rhamnogalacturonate lyase family protein (TAIR:AT1G09910.1); Has 301 Blast hits to 285 proteins in 64 species: …	cell wall	Rhamnogalacturonate lyase	Non-Secreted	Non-apoplastic	>tr|K4BUA1|K4BUA1_SOLLC Uncharacterized protein OS=Solanum lycopersicum PE=4 SV=1
6.01389	6.36741	6.04501	6.56933	6.51508	6.2149	5.5	6.40398							190	3	4	4	10.3	75.745	670	0	27.665	59327000	1913800	24959	268350	38686	657090	544850	179430	89997	110420	0.128514	0.990577	-0.0904214	-0.0715237	K4BUA4;K4DGM6;K4BUA3	K4BUA4	K4BUA4	'10.6.3'	'cell wall.degradation.pectate lyases and polygalacturonases'	'(at1g09910 : 924.0) Rhamnogalacturonate lyase family protein; FUNCTIONS IN: lyase activity; INVOLVED IN: carbohydrate metabolic process; LOCATED IN: cellular_component unknown; EXPRESSED IN: 23 plant structures; EXPRESSED DURING: 13 growth stages; CONTAINS InterPro DOMAIN/s: Glycoside hydrolase-type carbohydrate-binding (InterPro:IPR011013), Rhamnogalacturonate lyase (InterPro:IPR010325), Carboh…	cell wall	Rhamnogalacturonate lyase	Convencional Secreted (SignP)	Non-apoplastic	>tr|K4BUA4|K4BUA4_SOLLC Uncharacterized protein OS=Solanum lycopersicum PE=4 SV=1
8.53093	8.27263	8.19899	8.29402	8.16962	8.03599	8.12542	7.41969							191	2	16	16	15	126.34	1144	0	156.21	3678100000	79960000	10745000	15157000	7545200	16370000	12942000	7870400	8462600	867650	1.06065	0.828	-0.386465	-0.325013	K4BUF6;K4DGP2	K4BUF6	K4BUF6	'10.6.2'	'cell wall.degradation.mannan-xylose-arabinose-fucose'	'(at1g58370 : 1277.0) Encodes a protein with xylanase activity.; RXF12; FUNCTIONS IN: endo-1,4-beta-xylanase activity, hydrolase activity, hydrolyzing O-glycosyl compounds; INVOLVED IN: carbohydrate metabolic process; LOCATED IN: cell wall; EXPRESSED IN: 24 plant structures; EXPRESSED DURING: 10 growth stages; CONTAINS InterPro DOMAIN/s: Glycoside hydrolase, family 10 (InterPro:IPR001000), Carboh…	cell wall	Glycosyl hydrolase	Leaderless Secreted	Non-apoplastic	>tr|K4BUF6|K4BUF6_SOLLC Uncharacterized protein OS=Solanum lycopersicum PE=4 SV=1
5.5	6.67599	6.68332	5.5	5.5	5.5	6.66463	5.5							192	1	2	2	7	54.837	486	0	4.5314	47927000	2522500	37059	1090800	411780	0	130820	100370	705090	46511	0.275884	0.845217	-0.298668	-0.206257	K4BUK4	K4BUK4	K4BUK4	'29.5'	'protein.degradation'	(at1g73300 : 444.0) serine carboxypeptidase-like 2 (scpl2); FUNCTIONS IN: serine-type carboxypeptidase activity; INVOLVED IN: proteolysis; LOCATED IN: endomembrane system; CONTAINS InterPro DOMAIN/s: Peptidase S10, serine carboxypeptidase (InterPro:IPR001563); BEST Arabidopsis thaliana protein match is: serine carboxypeptidase-like 1 (TAIR:AT5G36180.1); Has 4062 Blast hits to 3951 proteins in 474…	protein	Serine carboxypeptidase	Leaderless Secreted	Non-apoplastic	>tr|K4BUK4|K4BUK4_SOLLC Uncharacterized protein OS=Solanum lycopersicum PE=3 SV=1
8.75743	8.98292	8.59772	8.81476	8.82849	8.90572	8.76788	8.82131							194	1	23	23	44.9	81.353	766	0	224.33	17266000000	575520000	19710000	135590000	30539000	85604000	100720000	97400000	69181000	36778000	0.19965	1	0.0426447	0.0393249	K4BUP8	K4BUP8	K4BUP8	'29.5.1'	'protein.degradation.subtilases'	'(at5g67360 : 915.0) Encodes a subtilisin-like serine protease essential for mucilage release from seed coats.; ARA12; FUNCTIONS IN: serine-type endopeptidase activity; INVOLVED IN: proteolysis, seed coat development, mucilage metabolic process involved seed coat development, mucilage extrusion from seed coat; LOCATED IN: extracellular region, apoplast, cell wall, plant-type cell wall; EXPRESSED …	protein	Subtilase	Convencional Secreted (SignP)	Apoplastic	>tr|K4BUP8|K4BUP8_SOLLC Uncharacterized protein OS=Solanum lycopersicum PE=4 SV=1
8.55118	8.5152	8.51314	8.38695	8.51602	8.57792	8.44495	8.86976							196	3	16	15	31.6	81.101	751	0	175.76	8807300000	284110000	13958000	43066000	23381000	36426000	52692000	47601000	30606000	36376000	0.507185	0.975885	0.110546	0.100502	K4BUV9;K4D3Y8;K4D3Y7	K4BUV9	K4BUV9	'29.5.1'	'protein.degradation.subtilases'	'(at5g67090 : 612.0) Subtilisin-like serine endopeptidase family protein; FUNCTIONS IN: identical protein binding, serine-type endopeptidase activity; INVOLVED IN: proteolysis, negative regulation of catalytic activity; LOCATED IN: endomembrane system; EXPRESSED IN: 9 plant structures; EXPRESSED DURING: 4 anthesis, petal differentiation and expansion stage, D bilateral stage; CONTAINS InterPro DO…	protein	Subtilase	Convencional Secreted (SignP)	Non-apoplastic	>tr|K4BUV9|K4BUV9_SOLLC Uncharacterized protein OS=Solanum lycopersicum PE=4 SV=1
6.44782	6.44821	7.0329	6.47809	6.57292	6.97623	6.99497	6.72266							197	1	3	3	17.8	25.388	247	0	27.081	135040000	19291000	654780	1848600	2856900	2677200	2154200	4342700	4144900	611420	0.570093	0.814365	0.214937	0.182687	K4BV68	K4BV68	K4BV68	'20.1'	'stress.biotic'	'(at1g75040 : 262.0) Thaumatin-like protein involved in response to pathogens. mRNA level of the PR-5 gene (At1g75040)is significantly changed after cutting the inflorescence stem indicating the existence of a network of signal transducing pathways as other stress-regulated genes (At5g01410, At3g17800, At1g29930)do not response to the treatment.; pathogenesis-related gene 5 (PR5); FUNCTIONS IN: m…	stress response	Thaumatin-like protein	Convencional Secreted (SignP)	Apoplastic	>tr|K4BV68|K4BV68_SOLLC Uncharacterized protein OS=Solanum lycopersicum PE=4 SV=1
8.54492	8.86141	8.58995	8.68906	8.78669	8.82759	8.70186	8.88396							198	1	18	17	49.4	47.196	441	0	116.66	14651000000	610480000	25821000	111950000	40411000	97015000	96953000	103100000	72692000	62544000	0.799912	0.938203	0.128688	0.119164	K4BVA5	K4BVA5	K4BVA5	'26.4.1'	'misc.beta 1,3 glucan hydrolases.glucan endo-1,3-beta-glucosidase'	'(at2g16230 : 483.0) O-Glycosyl hydrolases family 17 protein; FUNCTIONS IN: cation binding, hydrolase activity, hydrolyzing O-glycosyl compounds, catalytic activity; INVOLVED IN: carbohydrate metabolic process; LOCATED IN: endomembrane system; EXPRESSED IN: root; CONTAINS InterPro DOMAIN/s: X8 (InterPro:IPR012946), Glycoside hydrolase, catalytic core (InterPro:IPR017853), Glycoside hydrolase, fam…	stress response	Glucan endo-1,3-beta-glucosidase	Convencional Secreted (SignP)	Apoplastic	>tr|K4BVA5|K4BVA5_SOLLC Uncharacterized protein OS=Solanum lycopersicum PE=3 SV=1
6.76243	6.62285	5.5	6.88884	6.40843	6.72235	6.90714	6.7755							200	1	3	3	5.7	95.753	845	0	24.951	136190000	3321800	129250	450740	276690	846080	291390	568190	563510	195930	0.328843	0.8295	0.259824	0.194448	K4BVG7	K4BVG7	K4BVG7	'29.5.3'	'protein.degradation.cysteine protease'	'(at1g09850 : 546.0) Arabidopsis thaliana papain-like cysteine peptidase; xylem bark cysteine peptidase 3 (XBCP3); FUNCTIONS IN: cysteine-type endopeptidase activity, cysteine-type peptidase activity; INVOLVED IN: proteolysis; LOCATED IN: vacuole; EXPRESSED IN: 24 plant structures; EXPRESSED DURING: 15 growth stages; CONTAINS InterPro DOMAIN/s: Peptidase C1A, papain (InterPro:IPR013128), Proteina…	protein	Cysteine protease	Non-Secreted	Non-apoplastic	>tr|K4BVG7|K4BVG7_SOLLC Uncharacterized protein OS=Solanum lycopersicum PE=3 SV=1
7.5648	7.3883	7.53087	7.58438	7.32938	7.68546	7.54957	7.84708							201	1	6	6	16.7	35.383	335	0	35.175	874440000	72870000	4940800	9038300	5684600	15644000	8257900	13060000	8544600	7700000	0.305115	0.983188	0.0857898	0.0767207	K4BVN4	K4BVN4	K4BVN4	'20.1'	'stress.biotic'	(at1g75800 : 342.0) Pathogenesis-related thaumatin superfamily protein; FUNCTIONS IN: molecular_function unknown; INVOLVED IN: response to other organism; LOCATED IN: endomembrane system; EXPRESSED IN: 22 plant structures; EXPRESSED DURING: 13 growth stages; CONTAINS InterPro DOMAIN/s: Thaumatin, conserved site (InterPro:IPR017949), Thaumatin, pathogenesis-related (InterPro:IPR001938); BEST Arabi…	stress response	Thaumatin-like protein	Convencional Secreted (SignP)	Apoplastic	>tr|K4BVN4|K4BVN4_SOLLC Uncharacterized protein OS=Solanum lycopersicum PE=4 SV=1
8.95862	9.33007	9.32162	9.17598	9.2249	9.27351	9.18915	9.19769							202	1	32	32	37.7	83.224	783	0	323.31	41698000000	1191400000	35529000	247720000	135180000	169710000	189260000	195610000	139210000	79141000	0.102315	1	0.0247424	0.0227224	K4BVR0	K4BVR0	K4BVR0	'29.5.1'	'protein.degradation.subtilases'	'(at1g20160 : 778.0) ATSBT5.2; FUNCTIONS IN: identical protein binding, serine-type endopeptidase activity; INVOLVED IN: proteolysis, negative regulation of catalytic activity; LOCATED IN: apoplast; EXPRESSED IN: 24 plant structures; EXPRESSED DURING: 12 growth stages; CONTAINS InterPro DOMAIN/s: Protease-associated PA (InterPro:IPR003137), Peptidase S8/S53, subtilisin/kexin/sedolisin (InterPro:I…	protein	Subtilase	Convencional Secreted (SignP)	Apoplastic	>tr|K4BVR0|K4BVR0_SOLLC Uncharacterized protein OS=Solanum lycopersicum PE=3 SV=1
8.74733	8.71204	8.74706	8.49168	8.65201	8.66903	8.6082	8.93615							203	4	17	16	36.9	60.052	540	0	168.32	10468000000	498490000	54081000	83550000	46450000	52766000	81371000	74350000	46238000	59680000	0.167518	1	0.0418186	0.0381377	K4BVU1;K4B459;K4CFC2;K4DH19	K4BVU1	K4BVU1	'10.8.1'	'cell wall.pectin*esterases.PME'	'(at1g76160 : 828.0) SKU5 similar 5 (sks5); FUNCTIONS IN: oxidoreductase activity, copper ion binding; INVOLVED IN: oxidation reduction; LOCATED IN: apoplast, cell wall, plant-type cell wall; EXPRESSED IN: 24 plant structures; EXPRESSED DURING: 13 growth stages; CONTAINS InterPro DOMAIN/s: Multicopper oxidase, type 3 (InterPro:IPR011707), Cupredoxin (InterPro:IPR008972), Multicopper oxidase, type…	cell wall	SKU5 similar	Convencional Secreted (SignP)	Apoplastic	>tr|K4BVU1|K4BVU1_SOLLC Uncharacterized protein OS=Solanum lycopersicum PE=4 SV=1
8.06517	7.76047	7.85347	7.838	7.67141	7.56964	7.78703	7.91841							204	1	6	6	23	34.37	305	0	33.665	1347600000	103660000	10871000	11699000	9593600	20068000	18114000	9242200	14377000	9698100	0.695554	0.899868	-0.142654	-0.129746	K4BVZ8	K4BVZ8	K4BVZ8	'29.5.3'	'protein.degradation.cysteine protease'	'(at4g35350 : 488.0) tracheary element vacuolar protein; xylem cysteine peptidase 1 (XCP1); FUNCTIONS IN: cysteine-type peptidase activity, cysteine-type endopeptidase activity; INVOLVED IN: proteolysis, developmental programmed cell death; LOCATED IN: plant-type vacuole; EXPRESSED IN: 20 plant structures; EXPRESSED DURING: 10 growth stages; CONTAINS InterPro DOMAIN/s: Peptidase C1A, papain (Inte…	protein	Cysteine peptidase	Non-Secreted	Non-apoplastic	>tr|K4BVZ8|K4BVZ8_SOLLC Uncharacterized protein OS=Solanum lycopersicum PE=3 SV=1
6.90183	7.36959	7.21885	7.5583	6.99955	7.42999	7.40528	6.74446							205	1	5	5	19	43.066	395	0	66.151	498010000	26211000	692970	3855800	2181500	8236400	2335300	5059500	3522700	326590	0.216734	0.971821	-0.117322	-0.096457	K4BX34	K4BX34	K4BX34	'1.3.6'	'PS.calvin cycle.aldolase'	'(at2g01140 : 648.0) Aldolase superfamily protein; FUNCTIONS IN: fructose-bisphosphate aldolase activity; INVOLVED IN: response to oxidative stress, response to cadmium ion, pentose-phosphate shunt; LOCATED IN: mitochondrion, chloroplast, plastoglobule; EXPRESSED IN: 25 plant structures; EXPRESSED DURING: 15 growth stages; CONTAINS InterPro DOMAIN/s: Aldolase-type TIM barrel (InterPro:IPR013785),…	others	Fructose-bisphosphate aldolase	Leaderless Secreted	Non-apoplastic	>tr|K4BX34|K4BX34_SOLLC Fructose-bisphosphate aldolase OS=Solanum lycopersicum PE=3 SV=1
7.61146	7.54877	7.48219	7.38238	7.25751	7.38824	7.37317	7.66651							207	1	8	2	9.6	104.63	928	0	6.3078	623010000	12979000	797840	2232300	1273100	1956000	1521400	1930100	1549900	1718700	0.369339	0.985572	-0.0848401	-0.0771518	K4BXC1	K4BXC1	K4BXC1	'26.3.1'	'misc.gluco-, galacto- and mannosidases.alpha-galactosidase'	'(at1g68560 : 1434.0) Encodes a bifunctional alpha-l-arabinofuranosidase/beta-d-xylosidase that belongs to family 3 of glycoside hydrolases.; alpha-xylosidase 1 (XYL1); FUNCTIONS IN: xyloglucan 1,6-alpha-xylosidase activity, xylan 1,4-beta-xylosidase activity, alpha-N-arabinofuranosidase activity, hydrolase activity, hydrolyzing O-glycosyl compounds; INVOLVED IN: response to cadmium ion, xylan ca…	cell wall	Glycosyl hydrolase	Convencional Secreted (SignP)	Apoplastic	>tr|K4BXC1|K4BXC1_SOLLC Uncharacterized protein OS=Solanum lycopersicum PE=3 SV=1
7.92095	7.59233	7.47094	7.35507	7.57521	7.44476	7.54725	7.92608							208	1	7	7	16	68.23	606	0	20.939	894760000	27961000	3240800	4686300	2058300	2015700	5585900	3619400	2880500	3874200	0.0868379	1	0.0385042	0.0331692	K4BXU9	K4BXU9	K4BXU9	'26.13'	'misc.acid and other phosphatases'	'(at1g13750 : 942.0) Purple acid phosphatases superfamily protein; FUNCTIONS IN: hydrolase activity, protein serine/threonine phosphatase activity, metal ion binding, acid phosphatase activity; INVOLVED IN: biological_process unknown; LOCATED IN: endomembrane system; EXPRESSED IN: 21 plant structures; EXPRESSED DURING: 13 growth stages; CONTAINS InterPro DOMAIN/s: Purple acid phosphatase, N-termi…	metabolism	Purple acid phosphatase	Convencional Secreted (SignP)	Non-apoplastic	>tr|K4BXU9|K4BXU9_SOLLC Purple acid phosphatase OS=Solanum lycopersicum PE=3 SV=1
8.1687	7.88329	7.81212	7.79199	7.7984	7.59746	7.78058	7.64518							209	1	11	11	20.9	70.992	632	0	30.327	1519600000	37064000	4558800	7217400	3091200	6659200	7168900	3416200	3649900	1302800	1.08259	0.830444	-0.20862	-0.189607	K4BY93	K4BY93	K4BY93	'3.8.2'	minor CHO metabolism.galactose.alpha-galactosidases'	'(at3g26380 : 786.0) Melibiase family protein; FUNCTIONS IN: alpha-galactosidase activity, hydrolase activity, hydrolyzing O-glycosyl compounds, catalytic activity; INVOLVED IN: N-terminal protein myristoylation, carbohydrate metabolic process, metabolic process, lactose catabolic process; LOCATED IN: cell wall; EXPRESSED IN: 23 plant structures; EXPRESSED DURING: 13 growth stages; CONTAINS Inter…	metabolism	Alpha-galactosidase	Convencional Secreted (SignP)	Non-apoplastic	>tr|K4BY93|K4BY93_SOLLC Alpha-galactosidase OS=Solanum lycopersicum PE=3 SV=1
7.01895	7.34994	7.70198	7.29691	6.89738	7.15848	7.45165	6.75027							210	4	6	6	23.7	36.674	338	0	16.786	447430000	21306000	668600	2304100	4193300	3991400	2006200	3451900	4458300	232320	0.635526	0.81875	-0.277499	-0.229632	K4BYG6;K4C8R4;K4BJW4;K4BWA9	K4BYG6;K4C8R4;K4BJW4	K4BYG6	'4.1.8'	'glycolysis.cytosolic branch.glyceraldehyde 3-phosphate dehydrogenase (GAP-DH)'	(p09094|g3pc_tobac : 572.0) Glyceraldehyde-3-phosphate dehydrogenase, cytosolic (EC 1.2.1.12) (Fragment) - Nicotiana tabacum (Common tobacco) & (at1g13440 : 555.0) glyceraldehyde-3-phosphate dehydrogenase C2 (GAPC2); FUNCTIONS IN: copper ion binding, glyceraldehyde-3-phosphate dehydrogenase activity, zinc ion binding; INVOLVED IN: response to oxidative stress, response to cadmium ion, gluconeogen…	metabolism	Glyceraldehyde-3-phosphate dehydrogenase	Non-Secreted	Non-apoplastic	>tr|K4BYG6|K4BYG6_SOLLC Glyceraldehyde-3-phosphate dehydrogenase OS=Solanum lycopersicum PE=3 SV=1;>tr|K4C8R4|K4C8R4_SOLLC Glyceraldehyde-3-phosphate dehydrogenase OS=Solanum lycopersicum PE=3 SV=1;>tr|K4BJW4|K4BJW4_SOLLC Glyceraldehyde-3-phosphate dehydro
5.5	5.5	5.5	6.35873	6.23262	6.28448	6.16361	6.76269							211	1	3	3	6.3	77.579	717	0	8.249	42193000	1454900	49647	40302	62198	360270	244930	244420	154930	298240	1.35659	1	0.646163	0.515178	K4BYN1	K4BYN1	K4BYN1	'30.2.3'	'signalling.receptor kinases.leucine rich repeat III'	'(at1g67510 : 922.0) Leucine-rich repeat protein kinase family protein; FUNCTIONS IN: protein serine/threonine kinase activity, kinase activity, ATP binding; INVOLVED IN: transmembrane receptor protein tyrosine kinase signaling pathway, protein amino acid phosphorylation; LOCATED IN: endomembrane system; EXPRESSED IN: 22 plant structures; EXPRESSED DURING: 13 growth stages; CONTAINS InterPro DOMA…	signalling	Lectin protein kinase family protein	Convencional Secreted (SignP)	Non-apoplastic	>tr|K4BYN1|K4BYN1_SOLLC Uncharacterized protein OS=Solanum lycopersicum PE=3 SV=1
6.92864	7.64968	7.41343	7.65038	7.53521	7.56132	7.42372	8.03197							213	2	10	9	24.9	52.712	482	0	21.647	815120000	37051000	128690	4474900	1815700	4408900	6672400	2938400	5400100	11212000	0.475488	0.809558	0.227521	0.186968	K4BZT8;K4CCI7	K4BZT8	K4BZT8	'26.4.1'	'misc.beta 1,3 glucan hydrolases.glucan endo-1,3-beta-glucosidase'	'(at5g58090 : 718.0) O-Glycosyl hydrolases family 17 protein; FUNCTIONS IN: cation binding, hydrolase activity, hydrolyzing O-glycosyl compounds, catalytic activity; INVOLVED IN: carbohydrate metabolic process; LOCATED IN: anchored to plasma membrane, plasma membrane, anchored to membrane; EXPRESSED IN: 24 plant structures; EXPRESSED DURING: 13 growth stages; CONTAINS InterPro DOMAIN/s: X8 (Inter…	stress response	Glucan endo-1,3-beta-glucosidase	Convencional Secreted (SignP)	Apoplastic	>tr|K4BZT8|K4BZT8_SOLLC Uncharacterized protein OS=Solanum lycopersicum PE=3 SV=1
5.5	5.85197	5.5	5.88737	5.83796	5.85701	5.80862	6.41502							214	2	3	2	11.9	35.833	327	0	6.2593	20488000	1138200	69732	141230	48120	192260	227900	167860	90276	200840	0.813561	0.816118	0.294821	0.249731	K4C0T5;K4C0T6	K4C0T5;K4C0T6	K4C0T5	'26.12'	misc.peroxidases'	'(at1g05260 : 410.0) Encodes a cold-inducible cationic peroxidase that is involved in the stress response. In response to low temperature, RCI3 transcripts accumulate in the aerial part and in roots of etiolated seedlings but only in roots of light-grown seedlings.; RARE COLD INDUCIBLE GENE 3 (RCI3); FUNCTIONS IN: peroxidase activity; INVOLVED IN: response to desiccation, response to cold, hypero…	peroxidases	Peroxidase	Convencional Secreted (SignP)	Non-apoplastic	>tr|K4C0T5|K4C0T5_SOLLC Peroxidase OS=Solanum lycopersicum PE=3 SV=1;>tr|K4C0T6|K4C0T6_SOLLC Peroxidase OS=Solanum lycopersicum PE=3 SV=1
9.00629	8.84475	8.76266	8.87704	8.97503	8.97626	8.7802	9.1825							216	2	13	13	44.9	53.395	486	0	278.27	18018000000	1059900000	100290000	135310000	95739000	153910000	177560000	154130000	107330000	135600000	0.501885	0.977281	0.105809	0.0964982	K4C131;K4AZN7	K4C131	K4C131	'10.6.3'	'cell wall.degradation.pectate lyases and polygalacturonases'	'(at3g61490 : 730.0) Pectin lyase-like superfamily protein; FUNCTIONS IN: polygalacturonase activity; INVOLVED IN: carbohydrate metabolic process; LOCATED IN: endomembrane system; EXPRESSED IN: 22 plant structures; EXPRESSED DURING: 14 growth stages; CONTAINS InterPro DOMAIN/s: Pectin lyase fold/virulence factor (InterPro:IPR011050), Glycoside hydrolase, family 28 (InterPro:IPR000743), Pectin lya…	cell wall	Pectin lyase	Convencional Secreted (SignP)	Non-apoplastic	>tr|K4C131|K4C131_SOLLC Uncharacterized protein OS=Solanum lycopersicum PE=3 SV=1
9.21458	9.03286	9.31355	9.10274	9.13994	9.35326	9.28594	9.2751							217	4	10	10	36.3	31.258	292	0	172.75	44961000000	4995700000	301230000	576980000	524850000	729520000	749450000	971620000	738200000	403850000	0.605832	0.975118	0.0976286	0.0907094	K4C145;K4AZR5;K4AZR4;K4AZS0	K4C145	K4C145	'20.1.7'	'stress.biotic.PR-proteins'	(p29060|chia_tobac : 411.0) Acidic endochitinase precursor (EC 3.2.1.14) - Nicotiana tabacum (Common tobacco) & (at5g24090 : 315.0) Chitinase A (class III) expressed exclusively under environmental stress conditions.; chitinase A (CHIA); FUNCTIONS IN: cation binding, hydrolase activity, hydrolyzing O-glycosyl compounds, catalytic activity; INVOLVED IN: response to salt stress, response to cold, c…	stress response	Chitinase	Convencional Secreted (SignP)	Apoplastic	>tr|K4C145|K4C145_SOLLC Uncharacterized protein OS=Solanum lycopersicum PE=3 SV=1
8.37038	8.26881	8.41005	8.38401	8.15664	8.12015	8.23068	8.37996							219	1	11	7	50.2	33.736	317	0	108.67	5064200000	460380000	43276000	77708000	40934000	104530000	61189000	41000000	50124000	41621000	1.0882	0.892753	-0.136459	-0.128095	K4C1C0	K4C1C0	K4C1C0	'26.9'	'misc.glutathione S transferases'	'(gnl|cdd|29388 : 441.0) no description available & (p22195|per1_arahy : 392.0) Cationic peroxidase 1 precursor (EC 1.11.1.7) (PNPC1) - Arachis hypogaea (Peanut) & (at5g05340 : 342.0) Peroxidase superfamily protein; FUNCTIONS IN: protein binding, peroxidase activity; INVOLVED IN: response to oxidative stress, oxidation reduction; LOCATED IN: apoplast, cell wall; EXPRESSED IN: 9 plant structures; …	redox	Peroxidase	Convencional Secreted (SignP)	Apoplastic	>tr|K4C1C0|K4C1C0_SOLLC Peroxidase OS=Solanum lycopersicum PE=3 SV=1
8.4086	7.95731	7.75561	8.04809	8.08182	7.82646	8.11015	8.01637							221	1	15	11	49.1	34.907	322	0	81.502	3065900000	180350000	22172000	25089000	7148600	36436000	37829000	18135000	25303000	8235600	0.0806861	1	-0.0337043	-0.0292902	K4C1Q9	K4C1Q9	K4C1Q9	'26.12'	'misc.peroxidases'	'(gnl|cdd|29388 : 445.0) no description available & (at5g05340 : 434.0) Peroxidase superfamily protein; FUNCTIONS IN: protein binding, peroxidase activity; INVOLVED IN: response to oxidative stress, oxidation reduction; LOCATED IN: apoplast, cell wall; EXPRESSED IN: 9 plant structures; EXPRESSED DURING: LP.04 four leaves visible, 4 anthesis, C globular stage, petal differentiation and expansion s…	peroxidases	Peroxidase	Convencional Secreted (SignP)	Apoplastic	>tr|K4C1Q9|K4C1Q9_SOLLC Peroxidase OS=Solanum lycopersicum PE=3 SV=1
7.42009	7.26649	7.48495	7.52272	7.38537	7.02637	7.41923	6.77145							223	1	5	5	10.7	62.633	552	0	13.922	526060000	21043000	1107400	2665900	2252000	5718600	4337200	1576900	2902000	482530	0.829333	0.814769	-0.272956	-0.234396	K4C2E8	K4C2E8	K4C2E8	'29.7.5'	protein.glycosylation.alpha-1,3-mannosyl-glycoprotein-beta-1,2-N-acetylglucosaminyltransferase(GnTI)'	'(at3g55260 : 784.0) Encodes a protein with &#946;-hexosaminidase activity (the enzyme is active with p-nitrophenyl-&#946;-N-acetylglucosaminide as substrate but displayed only a minor activity toward p-nitrophenyl-&#946;-N-acetylgalactosaminide). The enzyme displays no distinct preference for a specific terminal GlcNAc residue and indeed cleaved the asialoagalactodabsylglycopeptide GnGn to a mix…	protein	Beta-hexosaminidase	Convencional Secreted (SignP)	Non-apoplastic	>tr|K4C2E8|K4C2E8_SOLLC Beta-hexosaminidase OS=Solanum lycopersicum PE=3 SV=1
6.68802	7.53373	7.53565	7.38977	6.75555	7.1786	7.49	5.93224							224	6	8	8	41	23.554	210	0	27.526	454070000	30271000	406670	8411100	5128300	4643600	1575300	3396900	6636100	73204	0.524497	0.810381	-0.447695	-0.321219	K4C2F3;K4D7W9;K4CTB3;K4C9R7;K4BYB6;K4BT38	K4C2F3	K4C2F3	'21.2.1'	'redox.ascorbate and glutathione.ascorbate'	'(at1g19570 : 311.0) Encodes a member of the dehydroascorbate reductase gene family. Critical for a mutualistic symbiosis between the host Arabidopsis and the root colonizing fungus Piriformospora indica.; dehydroascorbate reductase (DHAR1); FUNCTIONS IN: glutathione dehydrogenase (ascorbate) activity; INVOLVED IN: in 6 processes; LOCATED IN: mitochondrion, apoplast, peroxisome, chloroplast, plas…	redox	Dehydroascorbate reductase	Non-Secreted	Non-apoplastic	>tr|K4C2F3|K4C2F3_SOLLC Uncharacterized protein OS=Solanum lycopersicum PE=4 SV=1
7.64771	7.49361	7.32164	6.98203	7.43583	7.14947	7.26446	6.96934							226	1	10	10	28.5	48.924	428	0	29.463	507940000	26734000	2137100	6512300	1957500	2841100	6666200	3176700	2952800	490020	0.396453	0.907592	-0.156473	-0.133361	K4C3A0	K4C3A0	K4C3A0	'35.2'	'not assigned.unknown'	(at5g58600 : 455.0) Belongs to a large family of plant-specific genes of unknown function. Involved in resistance to the powdery mildew species Erysiphe cichoracearum and Erysiphe orontii, but not to the unrelated pathogens Pseudomonas syringae or Peronospora parasitica. A member of the TBL (TRICHOME BIREFRINGENCE-LIKE) gene family containing a plant-specific DUF231 (domain of unknown function) d…	not assigned	Unknown protein	Convencional Secreted (SignP)	Non-apoplastic	>tr|K4C3A0|K4C3A0_SOLLC Uncharacterized protein OS=Solanum lycopersicum PE=4 SV=1
6.85997	7.26776	7.82829	7.40384	6.89408	7.31347	7.57705	5.5							227	2	4	4	20.7	23.723	213	0	9.9207	539370000	44947000	396680	6448800	9948200	9750900	2578700	5603100	10170000	51038	0.465229	0.794222	-0.518815	-0.345061	K4C3T2;K4C3T4	K4C3T2;K4C3T4	K4C3T2	'26.9'	'misc.glutathione S transferases'	(p46440|gstf2_tobac : 303.0) Glutathione S-transferase APIC (EC 2.5.1.18) (GST class-phi) - Nicotiana tabacum (Common tobacco) & (at2g47730 : 259.0) Encodes glutathione transferase belonging to the phi class of GSTs. Naming convention according to Wagner et al. (2002).; glutathione S-transferase phi 8 (GSTF8); FUNCTIONS IN: glutathione transferase activity, glutathione binding; INVOLVED IN: in 8 …	redox	Glutathione S-transferase	Non-Secreted	Non-apoplastic	>tr|K4C3T2|K4C3T2_SOLLC Uncharacterized protein OS=Solanum lycopersicum PE=3 SV=1;>tr|K4C3T4|K4C3T4_SOLLC Uncharacterized protein OS=Solanum lycopersicum PE=3 SV=1
5.5	6.54515	5.5	6.23073	7.01017	6.42302	6.36905	6.34252							228	1	5	5	17.4	46.021	420	0	9.9756	87508000	4605700	81098	659670	65676	404450	2121000	751310	310200	212230	0.986503	0.9264	0.592221	0.452655	K4C3U1	K4C3U1	K4C3U1	'29.5'	'protein.degradation'	'(at4g33490 : 431.0) Eukaryotic aspartyl protease family protein; FUNCTIONS IN: aspartic-type endopeptidase activity; INVOLVED IN: proteolysis; LOCATED IN: endomembrane system; EXPRESSED IN: 22 plant structures; EXPRESSED DURING: 13 growth stages; CONTAINS InterPro DOMAIN/s: Peptidase aspartic (InterPro:IPR021109), Peptidase aspartic, catalytic (InterPro:IPR009007), Peptidase A1 (InterPro:IPR0014…	protein	Aspartyl protease	Convencional Secreted (SignP)	Apoplastic	>tr|K4C3U1|K4C3U1_SOLLC Uncharacterized protein OS=Solanum lycopersicum PE=3 SV=1
5.5	6.69893	6.33684	5.5	5.5	5.5	6.43607	5.5							229	2	3	3	11.4	47.052	413	0	24.823	49033000	2451600	114020	925000	207520	266600	194980	312710	430820	0	0.30131	0.823366	-0.274927	-0.198813	K4C455;K4D7F1	K4C455	K4C455	'29.2.4'	'protein.synthesis.elongation'	(q6yw46|ef1g2_orysa : 625.0) Elongation factor 1-gamma 2 (EF-1-gamma 2) (eEF-1B gamma 2) - Oryza sativa (Rice) & (at1g09640 : 585.0) Translation elongation factor EF1B, gamma chain; FUNCTIONS IN: translation elongation factor activity; INVOLVED IN: translational elongation; EXPRESSED IN: male gametophyte, pollen tube; EXPRESSED DURING: L mature pollen stage, M germinated pollen stage, seed develo…	protein	Elongation factor	Non-Secreted	Non-apoplastic	>tr|K4C455|K4C455_SOLLC Uncharacterized protein OS=Solanum lycopersicum PE=4 SV=1
7.92945	8.01703	7.49971	8.307	8.20485	7.78097	8.00449	7.70428							233	1	14	10	49.5	34.566	319	0	124.55	2256700000	132740000	15750000	23680000	4260800	25829000	26666000	14750000	19349000	2460100	0.0248116	0.992936	-0.0146542	-0.0121935	K4C5I8	K4C5I8	K4C5I8	'26.12'	'misc.peroxidases'	'(gnl|cdd|29388 : 436.0) no description available & (at5g05340 : 427.0) Peroxidase superfamily protein; FUNCTIONS IN: protein binding, peroxidase activity; INVOLVED IN: response to oxidative stress, oxidation reduction; LOCATED IN: apoplast, cell wall; EXPRESSED IN: 9 plant structures; EXPRESSED DURING: LP.04 four leaves visible, 4 anthesis, C globular stage, petal differentiation and expansion s…	peroxidases	Peroxidase	Convencional Secreted (SignP)	Apoplastic	>tr|K4C5I8|K4C5I8_SOLLC Peroxidase OS=Solanum lycopersicum PE=3 SV=1
5.5	5.5	6.53886	6.51065	5.5	5.5	6.54183	5.5							234	1	2	2	5.5	49.243	438	0	2.4321	52364000	1870100	13253	154050	212610	538690	242210	264450	373350	71528	0.262513	0.821094	-0.251922	-0.180694	K4C6L0	K4C6L0	K4C6L0	'21.1.1'	'redox.thioredoxin.PDIL'	'(q43116|pdi_ricco : 592.0) Protein disulfide-isomerase precursor (EC 5.3.4.1) (PDI) - Ricinus communis (Castor bean) & (at1g21750 : 537.0) Encodes a protein disulfide isomerase-like (PDIL) protein, a member of a multigene family within the thioredoxin (TRX) superfamily; isoform contains non-consensus GA donor splice site at intron 9. Transcript levels for this gene are up-regulated in response t…	redox	Protein disulfide-isomerase	Convencional Secreted (SignP)	Non-apoplastic	>tr|K4C6L0|K4C6L0_SOLLC Protein disulfide-isomerase OS=Solanum lycopersicum PE=3 SV=1
6.94358	5.5	6.35118	5.5	6.38095	6.37131	6.38189	5.5							235	1	2	2	11.6	25.318	224	0	6.4997	43076000	3076900	636820	75006	258050	132100	708280	637910	526900	101780	0.0731995	0.989532	0.0848475	0.0599478	K4C6V9	K4C6V9	K4C6V9	'35.2'	'not assigned.unknown'	(at1g20225 : 217.0) Thioredoxin superfamily protein; FUNCTIONS IN: molecular_function unknown; INVOLVED IN: biological_process unknown; LOCATED IN: vacuole; CONTAINS InterPro DOMAIN/s: Thioredoxin-like fold (InterPro:IPR012336); BEST Arabidopsis thaliana protein match is: Thioredoxin superfamily protein (TAIR:AT1G76020.1); Has 208 Blast hits to 204 proteins in 76 species: Archae - 0; Bacteria - 1…	not assigned	Thioredoxin	Convencional Secreted (SignP)	Non-apoplastic	>tr|K4C6V9|K4C6V9_SOLLC Uncharacterized protein OS=Solanum lycopersicum PE=4 SV=1
7.50461	6.71217	5.5	6.09992	6.4068	5.5	6.0172	5.5							236	1	4	4	19.9	29.704	266	0	58.475	95036000	6335800	1709300	1707400	17939	608330	2068400	0	168360	56026	0.583392	0.835304	-0.598176	-0.403607	K4C6W9	K4C6W9	K4C6W9	'26.13'	'misc.acid and other phosphatases'	'(gnl|cdd|67385 : 247.0) no description available & (at4g25150 : 228.0) HAD superfamily, subfamily IIIB acid phosphatase ; FUNCTIONS IN: acid phosphatase activity; INVOLVED IN: biological_process unknown; LOCATED IN: endomembrane system; EXPRESSED IN: 21 plant structures; EXPRESSED DURING: 9 growth stages; CONTAINS InterPro DOMAIN/s: Acid phosphatase (Class B) (InterPro:IPR005519), Vegetative sto…	metabolism	Acid phosphatase	Convencional Secreted (SignP)	Non-apoplastic	>tr|K4C6W9|K4C6W9_SOLLC Uncharacterized protein OS=Solanum lycopersicum PE=4 SV=1
6.58938	6.9201	6.84458	7.09107	6.83104	6.89136	6.98112	6.64667							237	1	4	4	8.1	82.73	776	0	24.293	203030000	6549500	83666	1013600	331390	1774700	1035900	1007300	1065600	237330	0.0671277	1	-0.023733	-0.0210776	K4C726	K4C726	K4C726	'29.5.1'	'protein.degradation.subtilases'	'(at3g14067 : 976.0) Subtilase family protein; FUNCTIONS IN: identical protein binding, serine-type endopeptidase activity; INVOLVED IN: proteolysis, negative regulation of catalytic activity; LOCATED IN: apoplast, plasma membrane, vacuole, plant-type cell wall; EXPRESSED IN: 24 plant structures; EXPRESSED DURING: 13 growth stages; CONTAINS InterPro DOMAIN/s: Protease-associated PA (InterPro:IPR0…	protein	Subtilase	Convencional Secreted (SignP)	Non-apoplastic	>tr|K4C726|K4C726_SOLLC Uncharacterized protein OS=Solanum lycopersicum PE=4 SV=1
6.86247	6.91138	7.24635	7.23447	6.86173	6.79851	6.9422	6.62272							242	1	9	9	24	61.513	554	0	21.518	247490000	7734200	244780	1423900	756390	2262300	1191900	719060	1063700	72200	1.08991	0.812	-0.257377	-0.229189	K4C8H3	K4C8H3	K4C8H3	'13.2.2.2'	'amino acid metabolism.degradation.glutamate family.proline'	(at5g62530 : 927.0) Encodes mitochondrial Delta-pyrroline-5- carboxylate dehydrogenase. Involved in the catabolism of proline to glutamate. Involved in protection from proline toxicity. Induced at pathogen infection sites. P5CDH and SRO5 (an overlapping gene in the sense orientation) generate 24-nt and 21-nt siRNAs, which together are components of a regulatory loop controlling reactive oxygen sp…	metabolism	Aldehyde dehydrogenase	Leaderless Secreted	Non-apoplastic	>tr|K4C8H3|K4C8H3_SOLLC Uncharacterized protein OS=Solanum lycopersicum PE=4 SV=1
8.4223	8.08501	8.269	8.05185	8.07864	8.0412	8.17132	8.20691							243	1	8	7	46	23.333	211	0	27.611	3206900000	229060000	17400000	43716000	22612000	27115000	37263000	26940000	35932000	18085000	0.38077	0.973146	-0.0825222	-0.0753967	K4C8U3	K4C8U3	K4C8U3	'20.1.7.6.1'	'stress.biotic.PR-proteins.proteinase inhibitors.trypsin inhibitor'	'(at1g17860 : 191.0) Kunitz family trypsin and protease inhibitor protein; FUNCTIONS IN: endopeptidase inhibitor activity; INVOLVED IN: biological_process unknown; LOCATED IN: apoplast, cell wall; EXPRESSED IN: 17 plant structures; EXPRESSED DURING: 13 growth stages; CONTAINS InterPro DOMAIN/s: Proteinase inhibitor I3, Kunitz legume (InterPro:IPR002160), Kunitz inhibitor ST1-like (InterPro:IPR011…	stress response	Kunitz family trypsin and protease inhibitor protein	Convencional Secreted (SignP)	Apoplastic	>tr|K4C8U3|K4C8U3_SOLLC Uncharacterized protein OS=Solanum lycopersicum PE=4 SV=1
7.90582	7.76133	7.76194	7.58959	7.5546	7.54319	7.66201	7.1917							244	1	6	5	33.5	22.26	200	0	7.1743	875340000	79576000	12073000	15753000	9678600	13361000	9077400	7761100	9757000	2114000	1.15701	0.803	-0.266796	-0.237995	K4C8U4	K4C8U4	K4C8U4	'20.1.7.6.1'	'stress.biotic.PR-proteins.proteinase inhibitors.trypsin inhibitor'	'(at1g17860 : 175.0) Kunitz family trypsin and protease inhibitor protein; FUNCTIONS IN: endopeptidase inhibitor activity; INVOLVED IN: biological_process unknown; LOCATED IN: apoplast, cell wall; EXPRESSED IN: 17 plant structures; EXPRESSED DURING: 13 growth stages; CONTAINS InterPro DOMAIN/s: Proteinase inhibitor I3, Kunitz legume (InterPro:IPR002160), Kunitz inhibitor ST1-like (InterPro:IPR011…	stress response	Kunitz family trypsin and protease inhibitor protein	Convencional Secreted (SignP)	Apoplastic	>tr|K4C8U4|K4C8U4_SOLLC Uncharacterized protein OS=Solanum lycopersicum PE=4 SV=1
7.32564	7.30094	7.49524	7.4877	7.23205	7.23545	7.41896	7.23573							245	1	10	10	30.4	50.268	461	0	27.531	546710000	22780000	850260	3175400	2421300	6086700	3662700	2898900	2748000	936480	0.888531	0.963825	-0.121831	-0.113935	K4C947	K4C947	K4C947	'13.1.3.5.3'	'amino acid metabolism.synthesis.aspartate family.lysine.LL-diaminopimelic acid aminotransferase'	(at4g33680 : 710.0) Involved in disease resistance against Pseudomonas syringae. mutants have elevated SA levels, a low level of spontaneous cell death, callose deposition, and enlarged cells in leaves. genetically maps on chr 4 between L23H3 and nga1139.; ABERRANT GROWTH AND DEATH 2 (AGD2); FUNCTIONS IN: transaminase activity, copper ion binding, L,L-diaminopimelate aminotransferase activity; IN…	metabolism	AGD2-like defense response protein	Non-Secreted	Non-apoplastic	>tr|K4C947|K4C947_SOLLC Uncharacterized protein OS=Solanum lycopersicum PE=3 SV=1
6.57858	6.90042	6.81306	6.93573	7.00247	6.93613	7.03019	6.74668							246	4	6	4	12.7	68.819	628	0	13.888	200720000	8028900	146260	1629600	439860	1647000	1322400	1034800	1451600	357460	0.553116	0.965791	0.121918	0.110569	K4C994;K4C992;K4DAM1;K4ATC0	K4C994	K4C994	'10.6.1'	'cell wall.degradation.cellulases and beta -1,4-glucanases'	'(at5g20950 : 981.0) Glycosyl hydrolase family protein; FUNCTIONS IN: hydrolase activity, hydrolyzing O-glycosyl compounds; INVOLVED IN: carbohydrate metabolic process; LOCATED IN: cell wall, membrane, plant-type cell wall; EXPRESSED IN: 25 plant structures; EXPRESSED DURING: 13 growth stages; CONTAINS InterPro DOMAIN/s: Glycoside hydrolase, family 3, N-terminal (InterPro:IPR001764), Glycoside hy…	cell wall	Glycosyl hydrolase	Convencional Secreted (SignP)	Non-apoplastic	>tr|K4C994|K4C994_SOLLC Uncharacterized protein OS=Solanum lycopersicum PE=4 SV=1
8.30326	7.92566	7.48151	7.75636	8.0985	7.87188	7.34223	8.0505							247	1	13	12	30	56.034	494	0	60.123	1977600000	65920000	7581100	12115000	1612400	9667600	17313000	9112600	2365900	6153000	0.0367514	1	-0.0259233	-0.0208383	K4C9K1	K4C9K1	K4C9K1	'29.5'	'protein.degradation'	'(p37891|cbp3_orysa : 692.0) Serine carboxypeptidase 3 precursor (EC 3.4.16.5) (Serine carboxypeptidase III) - Oryza sativa (Rice) & (at3g45010 : 678.0) serine carboxypeptidase-like 48 (scpl48); FUNCTIONS IN: serine-type carboxypeptidase activity; INVOLVED IN: proteolysis; LOCATED IN: endomembrane system; EXPRESSED IN: 24 plant structures; EXPRESSED DURING: 13 growth stages; CONTAINS InterPro DOM…	protein	Carboxypeptidase	Convencional Secreted (SignP)	Non-apoplastic	>tr|K4C9K1|K4C9K1_SOLLC Carboxypeptidase OS=Solanum lycopersicum PE=3 SV=1
8.51815	7.82628	7.56136	8.01364	8.2082	7.68164	7.72652	7.26769							249	1	9	9	36.9	35.182	317	0	192.74	2065600000	129100000	23308000	18373000	3313400	20929000	40475000	11214000	9731500	1755300	0.409693	0.825361	-0.258845	-0.202381	K4CA23	K4CA23	K4CA23	'26.12'	'misc.peroxidases'	'(at4g33420 : 426.0) Peroxidase superfamily protein; FUNCTIONS IN: peroxidase activity, heme binding; INVOLVED IN: response to oxidative stress, oxidation reduction; EXPRESSED IN: 20 plant structures; EXPRESSED DURING: 10 growth stages; CONTAINS InterPro DOMAIN/s: Haem peroxidase (InterPro:IPR010255), Plant peroxidase (InterPro:IPR000823), Peroxidases heam-ligand binding site (InterPro:IPR019793)…	peroxidases	Peroxidase	Convencional Secreted (SignP)	Non-apoplastic	>tr|K4CA23|K4CA23_SOLLC Peroxidase OS=Solanum lycopersicum PE=3 SV=1
8.09861	8.20674	8.39756	8.54989	8.3061	8.28648	8.39016	8.50348							251	1	14	14	60.9	33.535	312	0	188.99	5622100000	374810000	10610000	46163000	19632000	120590000	55448000	34186000	43885000	44294000	0.207489	1	0.0583549	0.0524904	K4CAA1	K4CAA1	K4CAA1	'26.9'	'misc.glutathione S transferases'	'(gnl|cdd|29388 : 426.0) no description available & (p22195|per1_arahy : 410.0) Cationic peroxidase 1 precursor (EC 1.11.1.7) (PNPC1) - Arachis hypogaea (Peanut) & (at5g58400 : 343.0) Peroxidase superfamily protein; FUNCTIONS IN: peroxidase activity, heme binding; INVOLVED IN: oxidation reduction, response to oxidative stress; LOCATED IN: endomembrane system; EXPRESSED IN: 6 plant structures; EXP…	redox	Peroxidase	Convencional Secreted (SignP)	Apoplastic	>tr|K4CAA1|K4CAA1_SOLLC Peroxidase OS=Solanum lycopersicum PE=3 SV=1
7.02621	7.31821	7.0693	7.2552	7.01452	7.16912	7.01682	5.5							252	4	3	3	7.6	55.66	498	0	19.552	334430000	16722000	602960	4459000	1081600	4711700	1264600	3282100	886350	433260	0.577921	0.889419	-0.492113	-0.35159	K4CAF9;K4CAG0;K4CAF7;K4CAF8	K4CAF9;K4CAG0;K4CAF7	K4CAF9	'29.5.5'	'protein.degradation.serine protease'	'(at4g12910 : 701.0) serine carboxypeptidase-like 20 (scpl20); FUNCTIONS IN: serine-type carboxypeptidase activity; INVOLVED IN: proteolysis; LOCATED IN: vacuole; EXPRESSED IN: 23 plant structures; EXPRESSED DURING: 13 growth stages; CONTAINS InterPro DOMAIN/s: Peptidase S10, serine carboxypeptidase (InterPro:IPR001563), Peptidase S10, serine carboxypeptidase, active site (InterPro:IPR018202); BE…	protein	Carboxypeptidase	Convencional Secreted (SignP)	Apoplastic	>tr|K4CAF9|K4CAF9_SOLLC Carboxypeptidase OS=Solanum lycopersicum PE=3 SV=1;>tr|K4CAG0|K4CAG0_SOLLC Carboxypeptidase OS=Solanum lycopersicum PE=3 SV=1;>tr|K4CAF7|K4CAF7_SOLLC Carboxypeptidase OS=Solanum lycopersicum PE=3 SV=1
8.19126	7.65226	7.71625	7.72778	7.95427	7.36986	7.57647	7.69175							254	1	8	8	29.9	41.514	371	0	63.759	1308300000	68857000	10808000	5316400	4627600	12975000	21366000	4659500	5907000	3197800	0.447934	0.917805	-0.173795	-0.148034	K4CAY1	K4CAY1	K4CAY1	'20.1'	'stress.biotic'	(gnl|cdd|47913 : 264.0) no description available & (at4g19810 : 236.0) Glycosyl hydrolase family protein with chitinase insertion domain; FUNCTIONS IN: cation binding, chitinase activity, hydrolase activity, hydrolyzing O-glycosyl compounds, catalytic activity; INVOLVED IN: carbohydrate metabolic process; LOCATED IN: cell wall; EXPRESSED IN: 10 plant structures; EXPRESSED DURING: LP.04 four leave…	stress response	Glycosyl hydrolase family protein with chitinase insertion domain	Convencional Secreted (SignP)	Non-apoplastic	>tr|K4CAY1|K4CAY1_SOLLC Uncharacterized protein OS=Solanum lycopersicum PE=3 SV=1
7.47881	7.17003	7.37749	7.40777	7.48107	7.62111	8.03092	7.57643							255	1	6	6	16.5	41.85	376	0	64.024	914540000	65324000	4794500	5022100	6401100	10253000	8627900	8086900	19844000	2294900	1.21683	0.790105	0.318862	0.28011	K4CAY2	K4CAY2	K4CAY2	'20.1'	'stress.biotic'	'(at4g19810 : 372.0) Glycosyl hydrolase family protein with chitinase insertion domain; FUNCTIONS IN: cation binding, chitinase activity, hydrolase activity, hydrolyzing O-glycosyl compounds, catalytic activity; INVOLVED IN: carbohydrate metabolic process; LOCATED IN: cell wall; EXPRESSED IN: 10 plant structures; EXPRESSED DURING: LP.04 four leaves visible, 4 anthesis, C globular stage; CONTAINS …	stress response	Glycosyl hydrolase family protein with chitinase insertion domain	Convencional Secreted (SignP)	Apoplastic	>tr|K4CAY2|K4CAY2_SOLLC Uncharacterized protein OS=Solanum lycopersicum PE=4 SV=1
6.72904	6.73814	5.5	5.5	5.5	6.76698	5.5	5.5							257	1	3	3	6.5	52.2	465	0	3.8759	95671000	4159600	247510	896730	0	0	891570	932560	911410	279830	0.257921	0.82925	-0.300051	-0.203205	K4CB67	K4CB67	K4CB67	'29.5.5'	'protein.degradation.serine protease'	(p55748|cbp22_horvu : 627.0) Serine carboxypeptidase II-2 precursor (EC 3.4.16.6) (CP-MII.2) [Contains: Serine carboxypeptidase II-2 chain A; Serine carboxypeptidase II-2 chain B] (Fragment) - Hordeum vulgare (Barley) & (at4g30810 : 622.0) serine carboxypeptidase-like 29 (scpl29); FUNCTIONS IN: serine-type carboxypeptidase activity; INVOLVED IN: proteolysis; LOCATED IN: vacuole; EXPRESSED IN: 22 …	protein	Serine carboxypeptidase	Convencional Secreted (SignP)	Non-apoplastic	>tr|K4CB67|K4CB67_SOLLC Carboxypeptidase OS=Solanum lycopersicum PE=3 SV=1
5.5	5.5	5.5	6.54681	5.5	6.54463	6.89912	5.5							258	1	2	2	11.4	17.015	149	0	3.4696	103420000	14774000	724960	1866100	3185300	2368500	1198500	1783500	3509600	137400	0.334842	0.804595	0.349234	0.241663	K4CBC7	K4CB67	K4CB67	'29.5.5'	'protein.degradation.serine protease'	(p55748|cbp22_horvu : 627.0) Serine carboxypeptidase II-2 precursor (EC 3.4.16.6) (CP-MII.2) [Contains: Serine carboxypeptidase II-2 chain A; Serine carboxypeptidase II-2 chain B] (Fragment) - Hordeum vulgare (Barley) & (at4g30810 : 622.0) serine carboxypeptidase-like 29 (scpl29); FUNCTIONS IN: serine-type carboxypeptidase activity; INVOLVED IN: proteolysis; LOCATED IN: vacuole; EXPRESSED IN: 22 …	protein	Serine carboxypeptidase	Convencional Secreted (SignP)	Non-apoplastic	>tr|K4CBC7|K4CBC7_SOLLC Uncharacterized protein OS=Solanum lycopersicum PE=3 SV=1
7.22464	6.52417	7.41283	6.91676	6.48678	6.34674	7.07602	6.26958							259	1	4	4	16.5	27.109	243	0	10.014	194970000	16248000	1220600	3483800	2767000	3251600	878570	1723900	2722100	200220	0.902191	0.857857	-0.474817	-0.374861	K4CBC8	K4CBC8	K4CBC8	'35.2'	'not assigned.unknown'	' (original description: Uncharacterized protein OS=Solanum lycopersicum OX=4081 GN=101264531 PE=3 SV=1)'	not assigned	Unknown protein	Convencional Secreted (SignP)	Apoplastic	>tr|K4CBC8|K4CBC8_SOLLC Uncharacterized protein OS=Solanum lycopersicum PE=3 SV=1
7.92234	7.90839	7.57989	7.80716	7.76465	7.70945	7.72735	8.08969							263	1	7	6	19.6	59.539	536	0	20.968	1516300000	56158000	2442700	9347500	3384200	8097500	10175000	9046200	6043300	7622000	0.053961	1	0.0183424	0.0163827	K4CBM5	K4CBM5	K4CBM5	'10.6'	cell wall.degradation'	'(at5g34940 : 668.0) The protein is predicted (WoLF PSORT program) to be membrane-associated.; glucuronidase 3 (GUS3); FUNCTIONS IN: beta-glucuronidase activity; INVOLVED IN: biological_process unknown; LOCATED IN: plant-type cell wall; EXPRESSED IN: 22 plant structures; EXPRESSED DURING: 11 growth stages; CONTAINS InterPro DOMAIN/s: Glycoside hydrolase family 79, N-terminal (InterPro:IPR005199);…	cell wall	Glucuronidase	Convencional Secreted (SignP)	Non-apoplastic	>tr|K4CBM5|K4CBM5_SOLLC Uncharacterized protein OS=Solanum lycopersicum PE=4 SV=1
7.53546	7.29305	7.47583	7.43681	7.32085	7.18392	7.34422	7.17673							264	1	6	5	18.9	54.843	477	0	14.646	494500000	22477000	1769700	3315700	2151800	5009900	2837100	3061200	2730400	1601500	1.40997	0.864623	-0.178859	-0.167482	K4CBN7	K4CBN7	K4CBN7	'26.13'	'misc.acid and other phosphatases'	'(at5g34850 : 726.0) Encodes a dual-targeted purple acid phosphatase isozyme AtPAP26. Involved in phosphate metabolism.; purple acid phosphatase 26 (PAP26); FUNCTIONS IN: protein serine/threonine phosphatase activity, acid phosphatase activity; INVOLVED IN: phosphate ion homeostasis; LOCATED IN: vacuole, plant-type cell wall; EXPRESSED IN: 25 plant structures; EXPRESSED DURING: 16 growth stages; …	metabolism	Purple acid phosphatase	Convencional Secreted (SignP)	Non-apoplastic	>tr|K4CBN7|K4CBN7_SOLLC Purple acid phosphatase OS=Solanum lycopersicum PE=3 SV=1
6.48511	6.31811	6.23885	6.02301	6.22515	6.25799	6.18825	6.59171							267	1	2	2	3.5	59.97	539	0.009009	0.85627	39561000	1465200	203880	318680	100410	121110	222530	216990	128570	153060	0.140352	1	0.0495094	0.0436712	K4CCH4	K4CCH4	K4CCH4	'10.8.1'	'cell wall.pectin*esterases.PME'	'(q43062|pme_prupe : 625.0) Pectinesterase PPE8B precursor (EC 3.1.1.11) (Pectin methylesterase) (PE) - Prunus persica (Peach) & (at4g33220 : 624.0) pectin methylesterase 44 (PME44); FUNCTIONS IN: enzyme inhibitor activity, pectinesterase activity; INVOLVED IN: cell wall modification; LOCATED IN: endomembrane system, cell wall, plant-type cell wall; EXPRESSED IN: 22 plant structures; EXPRESSED DU…	cell wall	Pectinesterase	Convencional Secreted (SignP)	Apoplastic	>tr|K4CCH4|K4CCH4_SOLLC Pectinesterase OS=Solanum lycopersicum PE=4 SV=1
6.90267	6.6091	6.63855	6.68926	6.65998	6.61381	6.66194	6.42641							268	1	2	2	8.6	35.409	314	0	12.786	109240000	4965300	327840	682490	440460	1108600	981570	602990	714090	107310	0.661866	0.963829	-0.119362	-0.109837	K4CCK4	K4CCK4	K4CCK4	'3.5'	'minor CHO metabolism.others'	(at5g57330 : 501.0) Galactose mutarotase-like superfamily protein; FUNCTIONS IN: isomerase activity, carbohydrate binding, aldose 1-epimerase activity, catalytic activity; INVOLVED IN: galactose metabolic process, carbohydrate metabolic process; LOCATED IN: cellular_component unknown; EXPRESSED IN: 26 plant structures; EXPRESSED DURING: 15 growth stages; CONTAINS InterPro DOMAIN/s: Glycoside hydr…	metabolism	Galactose mutarotase	Non-Secreted	Non-apoplastic	>tr|K4CCK4|K4CCK4_SOLLC Uncharacterized protein OS=Solanum lycopersicum PE=4 SV=1
7.05698	7.5232	7.30164	7.15749	5.5	7.20333	7.66176	5.5							269	2	4	4	10.3	54.105	485	0	9.4048	447520000	20342000	321170	5128300	2731100	2852600	922970	2836600	5509900	39133	0.664493	1	-0.793554	-0.503959	K4CDN1;K4CDN0	K4CDN1;K4CDN0	K4CDN0	'23.4.99'	'nucleotide metabolism.phosphotransfer and pyrophosphatases.misc'	'(at4g29680 : 642.0) Alkaline-phosphatase-like family protein; FUNCTIONS IN: hydrolase activity, catalytic activity; INVOLVED IN: metabolic process, nucleotide metabolic process; LOCATED IN: vacuole; EXPRESSED IN: 23 plant structures; EXPRESSED DURING: 13 growth stages; CONTAINS InterPro DOMAIN/s: Alkaline phosphatase-like, alpha/beta/alpha (InterPro:IPR017849), Type I phosphodiesterase/nucleotid…	metabolism	Alkaline-phosphatase-like protein	Leaderless Secreted	Non-apoplastic	>tr|K4CDN1|K4CDN1_SOLLC Uncharacterized protein OS=Solanum lycopersicum PE=4 SV=1;>tr|K4CDN0|K4CDN0_SOLLC Uncharacterized protein OS=Solanum lycopersicum PE=4 SV=1
7.30181	7.49496	7.4863	7.47605	7.36141	7.39637	7.53617	7.82789							271	1	2	2	8	42.812	389	0	34.054	646480000	43098000	3643500	6575300	3005400	7228500	4877200	5649400	5887200	6231900	0.334444	0.988412	0.0906774	0.0812746	K4CEI4	K4CEI4	K4CEI4	'10.8.1'	'cell wall.pectin*esterases.PME'	'(at1g05310 : 469.0) Pectin lyase-like superfamily protein; FUNCTIONS IN: pectinesterase activity; INVOLVED IN: cell wall modification; LOCATED IN: endomembrane system, cell wall, plant-type cell wall; EXPRESSED IN: 12 plant structures; EXPRESSED DURING: 6 growth stages; CONTAINS InterPro DOMAIN/s: Pectinesterase, active site (InterPro:IPR018040), Pectin lyase fold/virulence factor (InterPro:IPR0…	cell wall	Pectinesterase	Convencional Secreted (SignP)	Apoplastic	>tr|K4CEI4|K4CEI4_SOLLC Pectinesterase OS=Solanum lycopersicum PE=4 SV=1
7.05998	7.40449	7.4494	6.81784	6.59903	6.92482	7.27843	5.5							272	1	7	7	14.8	61.142	559	0	23.409	295270000	7980300	298840	1845600	1249100	870330	407890	1188300	2095000	25211	0.718194	0.875333	-0.607359	-0.429988	K4CEP2	K4CEP2	K4CEP2	'4.1.12'	'glycolysis.cytosolic branch.phosphoglycerate mutase'	'(p35494|pmgi_tobac : 1013.0) 2,3-bisphosphoglycerate-independent phosphoglycerate mutase (EC 5.4.2.1) (Phosphoglyceromutase) (BPG-independent PGAM) (PGAM-I) - Nicotiana tabacum (Common tobacco) & (at3g08590 : 902.0) Phosphoglycerate mutase, 2,3-bisphosphoglycerate-independent; FUNCTIONS IN: manganese ion binding, phosphoglycerate mutase activity, 2,3-bisphosphoglycerate-independent phosphoglycer…	metabolism	Phosphoglyceromutase	Non-Secreted	Non-apoplastic	>tr|K4CEP2|K4CEP2_SOLLC Uncharacterized protein OS=Solanum lycopersicum PE=4 SV=1
6.63819	6.15628	6.17418	6.78751	6.08892	6.1262	6.30421	5.5							273	2	3	3	21.7	27.792	258	0	12.439	57578000	3386900	234770	438550	199370	1365100	417340	416880	286790	28181	0.930308	0.838788	-0.434208	-0.350845	P29795;K4CEP4	P29795;K4CEP4	P29795	'1.1.1.2'	PS.lightreaction.photosystem II.PSII polypeptide subunits'	'(p93566|psbp_soltu : 418.0) Oxygen-evolving enhancer protein 2, chloroplast precursor (OEE2) (23 kDa subunit of oxygen evolving system of photosystem II) (OEC 23 kDa subunit) (23 kDa thylakoid membrane protein) - Solanum tuberosum (Potato) & (at1g06680 : 353.0) Encodes a 23 kD extrinsic protein that is part of photosystem II and participates in the regulation of oxygen evolution.; photosystem II…	others	Oxygen-evolving enhancer protein 2, chloroplastic	Leaderless Secreted	Non-apoplastic	>sp|P29795|PSBP_SOLLC Oxygen-evolving enhancer protein 2, chloroplastic OS=Solanum lycopersicum GN=PSBP PE=2 SV=1;>tr|K4CEP4|K4CEP4_SOLLC Uncharacterized protein OS=Solanum lycopersicum PE=4 SV=1
7.96847	8.44697	8.38374	8.59969	8.37332	8.5772	8.51104	8.90694							274	1	16	16	33.7	44.082	409	0	276.34	7954300000	497140000	11961000	81896000	26285000	102340000	56339000	67534000	68248000	82547000	0.661801	0.839312	0.242409	0.206108	K4CEV0	K4CEV0	K4CEV0	'10.5.1.1'	'cell wall.cell wall proteins.AGPs.AGP'	'(at4g12730 : 384.0) AF333971 Arabidopsis thaliana fasciclin-like arabinogalactan-protein 2 (Fla2) mRNA, complete cds; FASCICLIN-like arabinogalactan 2 (FLA2); INVOLVED IN: response to cyclopentenone; LOCATED IN: anchored to plasma membrane, plasma membrane, anchored to membrane, membrane; EXPRESSED IN: 25 plant structures; EXPRESSED DURING: 13 growth stages; CONTAINS InterPro DOMAIN/s: FAS1 doma…	cell wall	FASCICLIN-like arabinogalactan protein	Convencional Secreted (SignP)	Apoplastic	>tr|K4CEV0|K4CEV0_SOLLC Uncharacterized protein OS=Solanum lycopersicum PE=4 SV=1
6.5711	6.14928	6.11551	6.16752	6.27916	6.07471	6.0244	5.5							278	1	2	2	7.5	51.321	468	0	36.867	37104000	1374200	125110	224360	77189	266430	416210	137670	90826	36410	0.689426	0.823377	-0.281286	-0.234875	K4CF40	K4CF40	K4CF40	'26.4.1'	'misc.beta 1,3 glucan hydrolases.glucan endo-1,3-beta-glucosidase'	(at2g05790 : 696.0) O-Glycosyl hydrolases family 17 protein; FUNCTIONS IN: cation binding, hydrolase activity, hydrolyzing O-glycosyl compounds, catalytic activity; INVOLVED IN: carbohydrate metabolic process; LOCATED IN: endomembrane system; EXPRESSED IN: 22 plant structures; EXPRESSED DURING: 13 growth stages; CONTAINS InterPro DOMAIN/s: X8 (InterPro:IPR012946), Glycoside hydrolase, catalytic c…	stress response	Glucan endo-1,3-beta-glucosidase	Convencional Secreted (SignP)	Non-apoplastic	>tr|K4CF40|K4CF40_SOLLC Uncharacterized protein OS=Solanum lycopersicum PE=3 SV=1
6.9832	6.96564	6.89355	7.00668	6.94733	6.90131	6.83447	7.17909							279	1	4	4	10.7	60.508	543	0	11.479	209870000	11046000	530920	1622300	715310	2092400	1865200	1729800	1185900	1303900	0.0140902	0.997752	0.00328457	0.00304485	K4CFC3	K4CFC3	K4CFC3	'10.8.1'	'cell wall.pectin*esterases.PME'	'(at1g76160 : 789.0) SKU5 similar 5 (sks5); FUNCTIONS IN: oxidoreductase activity, copper ion binding; INVOLVED IN: oxidation reduction; LOCATED IN: apoplast, cell wall, plant-type cell wall; EXPRESSED IN: 24 plant structures; EXPRESSED DURING: 13 growth stages; CONTAINS InterPro DOMAIN/s: Multicopper oxidase, type 3 (InterPro:IPR011707), Cupredoxin (InterPro:IPR008972), Multicopper oxidase, type…	cell wall	SKU5 similar	Convencional Secreted (SignP)	Apoplastic	>tr|K4CFC3|K4CFC3_SOLLC Uncharacterized protein OS=Solanum lycopersicum PE=4 SV=1
5.5	6.72923	6.82885	6.60386	5.5	6.62385	6.78519	6.5383							280	1	9	2	12.4	108.2	995	0	6.1638	96429000	1753300	0	346750	231720	456470	62006	245190	349440	61675	0.044022	1	-0.053652	-0.0376579	K4CFD4	K4CFD4	K4CFD4	'8.1.3'	'TCA / org transformation.TCA.aconitase'	'(p49608|acoc_cucma : 1687.0) Aconitate hydratase, cytoplasmic (EC 4.2.1.3) (Citrate hydro-lyase) (Aconitase) - Cucurbita maxima (Pumpkin) (Winter squash) & (at2g05710 : 1676.0) Encodes an aconitase that can catalyze the conversion of citrate to isocitrate through a cis-aconitate intermediate, indicating that it may participate in the TCA cycle and other primary metabolic pathways. The protein is…	metabolism	Aconitate hydratase	Non-Secreted	Non-apoplastic	>tr|K4CFD4|K4CFD4_SOLLC Aconitate hydratase OS=Solanum lycopersicum PE=3 SV=1
8.70281	8.3656	8.26759	8.4377	8.50973	8.48224	8.29308	8.86036							281	14	16	15	46	35.937	328	0	95.707	6885300000	362380000	28690000	46102000	18901000	59346000	61551000	55784000	32465000	59544000	0.251944	0.982347	0.0929253	0.080764	K4CFF0;K4BVR5;K4DH08;K4DH07;K4B1D5;K4CMV0;K4C0T3;K4CUU6;K4DBB7;K4AX33;K4BHZ1;K4C0T4;K4CF27;K4CEY0	K4CFF0	K4CFF0	'20.2.2'	'stress.abiotic.cold'	'(at1g05260 : 440.0) Encodes a cold-inducible cationic peroxidase that is involved in the stress response. In response to low temperature, RCI3 transcripts accumulate in the aerial part and in roots of etiolated seedlings but only in roots of light-grown seedlings.; RARE COLD INDUCIBLE GENE 3 (RCI3); FUNCTIONS IN: peroxidase activity; INVOLVED IN: response to desiccation, response to cold, hypero…	stress response	Peroxidase	Convencional Secreted (SignP)	Non-apoplastic	>tr|K4CFF0|K4CFF0_SOLLC Peroxidase OS=Solanum lycopersicum PE=3 SV=1
7.43963	7.16923	7.21365	7.40283	7.75011	7.11846	5.5	7.69825							284	1	4	4	11.8	49.002	448	0	33.933	861170000	47843000	467860	425710	149160	30164000	15218000	697540	23553	697280	0.21876	0.815818	-0.289632	-0.189333	K4CGA2	K4CGA2	K4CGA2	'26.16'	'misc.myrosinases-lectin-jacalin'	(at5g35370 : 129.0) S-locus lectin protein kinase family protein; FUNCTIONS IN: in 6 functions; INVOLVED IN: protein amino acid phosphorylation; LOCATED IN: endomembrane system; EXPRESSED IN: 11 plant structures; EXPRESSED DURING: 6 growth stages; CONTAINS InterPro DOMAIN/s: Curculin-like (mannose-binding) lectin (InterPro:IPR001480), Protein kinase, ATP binding site (InterPro:IPR017441), Serine/…	others	Lectin protein kinase family protein	Convencional Secreted (SignP)	Apoplastic	>tr|K4CGA2|K4CGA2_SOLLC Uncharacterized protein OS=Solanum lycopersicum PE=4 SV=1
5.5	7.03735	6.19081	5.5	5.5	5.5	5.5	5.5							285	3	2	2	4.4	57.37	521	0	4.1849	91372000	2855400	209450	1356400	87553	471830	193880	366490	157120	12603	0.749782	0.837818	-0.557039	-0.40806	Q42882;K4CGE7;K4DCJ8	Q42882;K4CGE7;K4DCJ8	Q42882	'2.1.2.1'	'major CHO metabolism.synthesis.starch.AGPase'	'(p23509|glgs_soltu : 998.0) Glucose-1-phosphate adenylyltransferase small subunit, chloroplast precursor (EC 2.7.7.27) (ADP-glucose synthase) (ADP-glucose pyrophosphorylase) (AGPase B) (Alpha-D-glucose-1-phosphate adenyl transferase) - Solanum tuberosum (Potato) & (at5g48300 : 875.0) Encodes the small subunit of ADP-glucose pyrophosphorylase. The small subunit is the catalytic isoform responsibl…	metabolism	Glucose-1-phosphate adenylyltransferase	Non-Secreted	Non-apoplastic	>sp|Q42882|GLGS_SOLLC Glucose-1-phosphate adenylyltransferase small subunit, chloroplastic OS=Solanum lycopersicum PE=2 SV=1;>tr|K4CGE7|K4CGE7_SOLLC Glucose-1-phosphate adenylyltransferase OS=Solanum lycopersicum PE=3 SV=1;>tr|K4DCJ8|K4DCJ8_SOLLC Glucose-1
6.53087	6.94488	6.70762	6.88567	7.03798	6.38591	6.55062	5.5							286	1	3	3	8.7	45.106	393	0	15.906	148400000	8729500	148330	1610800	692860	2017100	2742000	673770	793550	51214	0.555813	0.796816	-0.39863	-0.298759	K4CGQ4	K4CGQ4	K4CGQ4	'35.2'	'not assigned.unknown'	(at2g34070 : 410.0) Encodes a member of the TBL (TRICHOME BIREFRINGENCE-LIKE) gene family containing a plant-specific DUF231 (domain of unknown function) domain. TBL gene family has 46 members, two of which (TBR/AT5G06700 and TBL3/AT5G01360) have been shown to be involved in the synthesis and deposition of secondary wall cellulose, presumably by influencing the esterification state of pectic poly…	not assigned	Trichome birefringence-like protein	Convencional Secreted (SignP)	Apoplastic	>tr|K4CGQ4|K4CGQ4_SOLLC Uncharacterized protein OS=Solanum lycopersicum PE=4 SV=1
7.68123	8.25178	8.34586	8.31737	8.26658	8.26257	8.36806	7.98473							287	1	15	12	54.3	36.081	346	0	73.915	4554500000	253030000	5417200	41627000	20889000	58125000	46910000	34237000	38552000	7272500	0.154151	1	0.0714245	0.0606619	K4CGU8	K4CGU8	K4CGU8	'8.1.9'	'TCA / org transformation.TCA.malate DH'	'(at1g53240 : 541.0) Lactate/malate dehydrogenase family protein; FUNCTIONS IN: malate dehydrogenase activity, copper ion binding; INVOLVED IN: response to cadmium ion, response to salt stress, response to cold, defense response to bacterium, peptidyl-cysteine S-nitrosylation; LOCATED IN: mitochondrion, cell wall, chloroplast; EXPRESSED IN: 26 plant structures; EXPRESSED DURING: 15 growth stages;…	metabolism	Malate dehydrogenase	Leaderless Secreted	Non-apoplastic	>tr|K4CGU8|K4CGU8_SOLLC Malate dehydrogenase OS=Solanum lycopersicum PE=3 SV=1
5.5	7.12192	6.58387	7.25365	6.85156	7.30296	6.88193	7.53543							288	1	5	5	29.6	28.516	267	0	27.083	328510000	25270000	319740	3309400	693120	6726000	2314800	5992500	2418800	3495300	0.572546	0.856966	0.52811	0.368737	K4CH57	K4CH57	K4CH57	'1.1.5.2'	'PS.lightreaction.other electron carrier (ox/red).ferredoxin'	'(at1g02180 : 137.0) ferredoxin-related; FUNCTIONS IN: molecular_function unknown; INVOLVED IN: biological_process unknown; LOCATED IN: endomembrane system; EXPRESSED IN: 23 plant structures; EXPRESSED DURING: 15 growth stages; Has 54 Blast hits to 54 proteins in 11 species: Archae - 0; Bacteria - 0; Metazoa - 0; Fungi - 0; Plants - 54; Viruses - 0; Other Eukaryotes - 0 (source: NCBI BLink). & (r…	others	Ferredoxin-related	Leaderless Secreted	Apoplastic	>tr|K4CH57|K4CH57_SOLLC Uncharacterized protein OS=Solanum lycopersicum PE=4 SV=1
7.55129	7.40753	7.69207	7.45063	7.29566	7.37451	7.60022	7.77429							290	1	4	4	25.7	23.284	218	0	53.401	753640000	75364000	2851900	8653500	9539300	13943000	9150700	12002000	10952000	8272200	0.0391441	0.997925	-0.0142115	-0.0126223	K4CHA5	K4CHA5	K4CHA5	'26.19'	'misc.plastocyanin-like'	'(at3g20570 : 132.0) early nodulin-like protein 9 (ENODL9); FUNCTIONS IN: electron carrier activity, copper ion binding; LOCATED IN: anchored to membrane; EXPRESSED IN: 22 plant structures; EXPRESSED DURING: 13 growth stages; CONTAINS InterPro DOMAIN/s: Plastocyanin-like (InterPro:IPR003245), Cupredoxin (InterPro:IPR008972); BEST Arabidopsis thaliana protein match is: early nodulin-like protein 1…	redox	Plastocyanin-like/Cupredoxin	Convencional Secreted (SignP)	Apoplastic	>tr|K4CHA5|K4CHA5_SOLLC Uncharacterized protein OS=Solanum lycopersicum PE=4 SV=1
7.34842	8.09743	8.17026	8.09555	7.85817	8.13216	8.28235	8.32195							291	2	10	10	16.6	82.143	753	0	77.246	3100600000	124020000	684940	20778000	11395000	23586000	13118000	20222000	21598000	12641000	0.449015	0.827138	0.220742	0.180848	K4CHJ1;K4DCZ2	K4CHJ1	K4CHJ1	'11.9.3.3'	'lipid metabolism.lipid degradation.lysophospholipases.glycerophosphodiester phosphodiesterase'	(at5g55480 : 832.0) Glycerophosphoryl diester phosphodiesterase-like protein involved in cell wall cellulose accumulation and pectin linking. Impacts root hair, trichome and epidermal cell development.; SHV3-like 1 (SVL1); FUNCTIONS IN: phosphoric diester hydrolase activity, glycerophosphodiester phosphodiesterase activity; INVOLVED IN: trichome differentiation, cell wall pectin metabolic process…	metabolism	Phosphodiesterase	Convencional Secreted (SignP)	Non-apoplastic	>tr|K4CHJ1|K4CHJ1_SOLLC Uncharacterized protein OS=Solanum lycopersicum PE=4 SV=1
7.24611	7.3234	7.30107	7.38652	7.55078	7.29796	7.37758	7.65493							293	1	4	4	13.2	46.682	438	0	8.9003	639630000	63963000	1205300	11071000	2800400	10102000	18070000	6378800	7620400	6714400	0.921027	0.919	0.156038	0.143666	K4CHZ2	K4CHZ2	K4CHZ2	'26.4.1'	'misc.beta 1,3 glucan hydrolases.glucan endo-1,3-beta-glucosidase'	'(at1g66250 : 501.0) O-Glycosyl hydrolases family 17 protein; FUNCTIONS IN: cation binding, hydrolase activity, hydrolyzing O-glycosyl compounds, catalytic activity; INVOLVED IN: carbohydrate metabolic process; LOCATED IN: anchored to plasma membrane, plasma membrane, anchored to membrane; EXPRESSED IN: 22 plant structures; EXPRESSED DURING: 13 growth stages; CONTAINS InterPro DOMAIN/s: X8 (Inter…	stress response	O-glycosyl hydrolase	Convencional Secreted (SignP)	Apoplastic	>tr|K4CHZ2|K4CHZ2_SOLLC Uncharacterized protein OS=Solanum lycopersicum PE=3 SV=1
8.25686	7.63883	7.2406	7.60346	7.80494	7.4383	7.32255	7.73899							294	1	11	11	48	33.324	300	0	103.95	1002100000	62630000	13593000	8197100	2056900	8674500	13849000	5381500	4884300	5994100	0.17564	0.984877	-0.108741	-0.0876418	K4CI69	K4CI69	K4CI69	'10.8.2'	'cell wall.pectin*esterases.acetyl esterase'	'(gnl|cdd|66926 : 439.0) no description available & (at4g19420 : 436.0) Pectinacetylesterase family protein; CONTAINS InterPro DOMAIN/s: Pectinacetylesterase (InterPro:IPR004963); BEST Arabidopsis thaliana protein match is: Pectinacetylesterase family protein (TAIR:AT4G19410.1); Has 543 Blast hits to 535 proteins in 96 species: Archae - 2; Bacteria - 44; Metazoa - 119; Fungi - 0; Plants - 298; Vi…	cell wall	Pectinacetylesterase	Leaderless Secreted	Apoplastic	>tr|K4CI69|K4CI69_SOLLC Uncharacterized protein OS=Solanum lycopersicum PE=4 SV=1
7.27814	7.33756	7.09587	7.31589	6.99756	7.30261	7.2446	7.87549							295	1	4	4	14.4	19.067	174	0	9.4488	480590000	43690000	2092200	7857700	2881200	6995400	3596400	5404300	5020100	9842300	0.200556	0.987067	0.0982045	0.0822729	K4CIG7	K4CIG7	K4CIG7	'26.19'	'misc.plastocyanin-like'	(at4g31840 : 162.0) early nodulin-like protein 15 (ENODL15); FUNCTIONS IN: electron carrier activity, copper ion binding; LOCATED IN: plasma membrane, anchored to membrane; EXPRESSED IN: 22 plant structures; EXPRESSED DURING: 13 growth stages; CONTAINS InterPro DOMAIN/s: Plastocyanin-like (InterPro:IPR003245), Cupredoxin (InterPro:IPR008972); BEST Arabidopsis thaliana protein match is: early nodu…	redox	Plastocyanin-like/Cupredoxin	Convencional Secreted (SignP)	Non-apoplastic	>tr|K4CIG7|K4CIG7_SOLLC Uncharacterized protein OS=Solanum lycopersicum PE=4 SV=1
6.87405	7.97505	7.88276	7.75657	7.85008	8.17548	8.06707	7.47311							297	2	10	8	21.4	79.678	744	0	41.188	2043100000	63848000	59181	15224000	5048200	6735100	11536000	13921000	9535800	1788400	0.398564	0.855467	0.269331	0.207659	K4CIQ4;K4CIP7	K4CIQ4	K4CIQ4	'29.5.1'	'protein.degradation.subtilases'	(at5g67360 : 535.0) Encodes a subtilisin-like serine protease essential for mucilage release from seed coats.; ARA12; FUNCTIONS IN: serine-type endopeptidase activity; INVOLVED IN: proteolysis, seed coat development, mucilage metabolic process involved seed coat development, mucilage extrusion from seed coat; LOCATED IN: extracellular region, apoplast, cell wall, plant-type cell wall; EXPRESSED I…	protein	Subtilase	Convencional Secreted (SignP)	Apoplastic	>tr|K4CIQ4|K4CIQ4_SOLLC Uncharacterized protein OS=Solanum lycopersicum PE=4 SV=1
6.41233	7.27681	7.62611	6.48011	6.10762	7.10363	7.3947	5.5							299	4	8	8	14.9	50.845	462	0	20.634	292710000	8870000	291660	2215600	1727900	668630	414150	1178900	2373200	0	0.339999	0.780542	-0.422352	-0.275778	K4CK47;tr|A0A0D2Y2T1|A0A0D2Y2T1_FUSO4 Uncharacterized protein OS=Fusarium oxysporum f. sp. lycopersici (strain 4287 / CBS 123668 / FGSC 9935 / NRRL 34936) GN=FOXG_10580 PE=4 SV=1;W9K250;tr|A0A0J9VGH4|A0A0J9VGH4_FUSO4 Uncharacterized protein OS=Fusarium oxysporum f. sp. lycopersici (strain 4287 / CBS 123668 / FGSC 9935 / NRRL 34936) GN=FOXG_10580 PE=4 SV=1	K4CK47	K4CK47	'13.1.1.2.1'	'amino acid metabolism.synthesis.central amino acid metabolism.aspartate.aspartate aminotransferase'	'(at4g31990 : 766.0) Encodes a plastid-localized aspartate aminotransferase. Does not display any PAT (glutamate/aspartate-prephenate aminotransferase) activity even in the presence of a high concentration of prephenate.; aspartate aminotransferase 5 (ASP5); CONTAINS InterPro DOMAIN/s: Aminotransferase, class I/classII (InterPro:IPR004839), Pyridoxal phosphate-dependent transferase, major domain …	metabolism	Aspartate aminotransferase	Non-Secreted	Non-apoplastic	>tr|K4CK47|K4CK47_SOLLC Aspartate aminotransferase OS=Solanum lycopersicum PE=4 SV=1
6.40697	6.38009	6.28062	6.60441	6.25823	6.38247	6.47855	5.5							302	1	5	5	7.3	99.118	875	0	13.067	60175000	1280300	49303	193860	98830	403870	153920	178340	179240	22964	0.520437	0.841333	-0.263209	-0.213476	K4CL50	K4CL50	K4CL50	'29.5'	'protein.degradation'	(at4g33090 : 1347.0) encodes an aminopeptidase, a ortholog of mouse microsomal AP (EC 3.4.11.2).; aminopeptidase M1 (APM1); FUNCTIONS IN: aminopeptidase activity; INVOLVED IN: auxin polar transport; LOCATED IN: plasma membrane; EXPRESSED IN: 24 plant structures; EXPRESSED DURING: 13 growth stages; CONTAINS InterPro DOMAIN/s: Peptidase M1, puromycin-sensitive aminopeptidase (InterPro:IPR015568), P…	protein	Aminopeptidase	Non-Secreted	Non-apoplastic	>tr|K4CL50|K4CL50_SOLLC Uncharacterized protein OS=Solanum lycopersicum PE=4 SV=1
7.10629	6.95344	7.07715	7.2284	6.92916	6.95565	6.80293	5.5							305	1	3	3	11.4	53.22	482	0	15.749	235840000	10720000	641510	1926100	796150	2735500	1920100	1187600	1348900	164050	0.754157	0.815167	-0.544385	-0.401736	K4CLE1	K4CLE1	K4CLE1	'29.3.4.3'	'protein.targeting.secretory pathway.vacuole'	'(p49043|vpe_citsi : 737.0) Vacuolar-processing enzyme precursor (EC 3.4.22.-) (VPE) - Citrus sinensis (Sweet orange) & (at4g32940 : 715.0) Encodes a vacuolar processing enzyme belonging to a novel group of cysteine proteinases that is expressed in vegetative organs and is upregulated in association with various types of cell death and under stressed conditions. They are essential in processing s…	protein	Cysteine proteinase	Convencional Secreted (SignP)	Non-apoplastic	>tr|K4CLE1|K4CLE1_SOLLC Uncharacterized protein OS=Solanum lycopersicum PE=4 SV=1
7.34319	7.33389	6.76743	7.38543	7.22909	7.23517	7.25074	7.78237							307	1	4	4	25	22.134	200	0	23.938	523870000	74838000	3415000	14623000	2088800	15219000	9817700	10377000	8979000	10319000	0.359577	0.909447	0.166859	0.139003	K4CLQ0	K4CLQ0	K4CLQ0	'26.19'	'misc.plastocyanin-like'	'(at1g64640 : 160.0) early nodulin-like protein 8 (ENODL8); FUNCTIONS IN: electron carrier activity, copper ion binding; LOCATED IN: anchored to membrane; EXPRESSED IN: 18 plant structures; EXPRESSED DURING: 13 growth stages; CONTAINS InterPro DOMAIN/s: Plastocyanin-like (InterPro:IPR003245), Cupredoxin (InterPro:IPR008972); BEST Arabidopsis thaliana protein match is: early nodulin-like protein 3…	redox	Plastocyanin-like/Cupredoxin	Convencional Secreted (SignP)	Non-apoplastic	>tr|K4CLQ0|K4CLQ0_SOLLC Uncharacterized protein OS=Solanum lycopersicum PE=4 SV=1
7.614	6.87651	6.61608	7.11015	7.22471	7.02498	6.69231	7.42896							308	1	7	7	14.4	62.857	561	0	21.624	315590000	11271000	1373100	695520	305510	2157200	2731300	1818700	582830	1607000	0.0512911	1	0.0385569	0.0305074	K4CLQ7	K4CLQ7	K4CLQ7	'26.3.5'	'misc.gluco-, galacto- and mannosidases.glycosyl hydrolase family 5'	'(at1g13130 : 655.0) Cellulase (glycosyl hydrolase family 5) protein; FUNCTIONS IN: cation binding, hydrolase activity, hydrolyzing O-glycosyl compounds, catalytic activity; INVOLVED IN: carbohydrate metabolic process; LOCATED IN: endomembrane system; EXPRESSED IN: 8 plant structures; EXPRESSED DURING: 4 anthesis, C globular stage, F mature embryo stage, petal differentiation and expansion stage,…	cell wall	Cellulase	Convencional Secreted (SignP)	Non-apoplastic	>tr|K4CLQ7|K4CLQ7_SOLLC Uncharacterized protein OS=Solanum lycopersicum PE=3 SV=1
9.39503	9.33078	9.21688	9.23513	9.34774	9.28542	9.23865	9.5834							309	1	21	21	39.7	53.776	501	0	169.74	46716000000	2031100000	153190000	315750000	161740000	261840000	355970000	291730000	230130000	260810000	0.3403	0.995444	0.0693507	0.0637879	K4CLT6	K4CLT6	K4CLT6	'27.3.99'	'RNA.regulation of transcription.unclassified'	'(at5g10770 : 431.0) Eukaryotic aspartyl protease family protein; FUNCTIONS IN: DNA binding, aspartic-type endopeptidase activity; INVOLVED IN: proteolysis; EXPRESSED IN: 12 plant structures; EXPRESSED DURING: 4 anthesis, C globular stage, petal differentiation and expansion stage, E expanded cotyledon stage; CONTAINS InterPro DOMAIN/s: Peptidase aspartic (InterPro:IPR021109), Peptidase aspartic,…	DNA/RNA	Aspartyl protease	Convencional Secreted (SignP)	Apoplastic	>tr|K4CLT6|K4CLT6_SOLLC Uncharacterized protein OS=Solanum lycopersicum PE=3 SV=1
7.57583	6.38457	6.31925	6.60693	7.03989	6.50935	6.23807	6.63208							310	1	7	7	15	65.299	585	0	17.248	171160000	5705300	891710	295410	62192	1037000	2333400	641630	64527	379390	0.130916	0.980191	-0.116797	-0.0874457	K4CM66	K4CM66	K4CM66	'35.1'	'not assigned.no ontology'	'(at5g11540 : 739.0) D-arabinono-1,4-lactone oxidase family protein; FUNCTIONS IN: D-arabinono-1,4-lactone oxidase activity, oxidoreductase activity, FAD binding, catalytic activity; INVOLVED IN: oxidation reduction; LOCATED IN: endomembrane system, membrane; EXPRESSED IN: 14 plant structures; EXPRESSED DURING: 4 anthesis, petal differentiation and expansion stage, E expanded cotyledon stage; CON…	not assigned	D-arabinono-1,4-lactone oxidase	Convencional Secreted (SignP)	Apoplastic	>tr|K4CM66|K4CM66_SOLLC Uncharacterized protein OS=Solanum lycopersicum PE=4 SV=1
7.41762	7.76843	7.55954	7.75308	7.77479	7.81881	7.76677	7.98841							311	1	6	5	18.4	52.95	489	0	65.71	1408100000	78226000	1667000	14583000	3947800	14476000	12809000	13306000	9218700	8218600	1.12948	0.817849	0.212529	0.19348	K4CMF9	K4CMF9	K4CMF9	'26.4'	'misc.beta 1,3 glucan hydrolases'	'(at5g58090 : 634.0) O-Glycosyl hydrolases family 17 protein; FUNCTIONS IN: cation binding, hydrolase activity, hydrolyzing O-glycosyl compounds, catalytic activity; INVOLVED IN: carbohydrate metabolic process; LOCATED IN: anchored to plasma membrane, plasma membrane, anchored to membrane; EXPRESSED IN: 24 plant structures; EXPRESSED DURING: 13 growth stages; CONTAINS InterPro DOMAIN/s: X8 (Inter…	stress response	Glucan endo-1,3-beta-glucosidase	Convencional Secreted (SignP)	Apoplastic	>tr|K4CMF9|K4CMF9_SOLLC Uncharacterized protein OS=Solanum lycopersicum PE=3 SV=1
8.19131	8.02044	9.03503	8.03455	8.05983	7.8179	8.63373	6.97048							312	6	14	13	30.7	66.236	587	0	142.74	5413200000	180440000	6336800	18006000	48989000	18429000	21568000	9424100	57292000	393640	0.485818	0.783636	-0.449848	-0.316498	Q08307;K4CMI0;K4CMI1;Q08296;K4CMI3;K4CMI2	Q08307;K4CMI0;K4CMI1;Q08296	Q08307	'35.2'	'not assigned.unknown'	' (original description: Polyphenol oxidase E, chloroplastic OS=Solanum lycopersicum PE=3 SV=1)'	not assigned	Polyphenol oxidase E, chloroplastic	Leaderless Secreted	Non-apoplastic	>sp|Q08307|PPOE_SOLLC Polyphenol oxidase E, chloroplastic OS=Solanum lycopersicum PE=3 SV=1;>tr|K4CMI0|K4CMI0_SOLLC Uncharacterized protein OS=Solanum lycopersicum PE=4 SV=1;>tr|K4CMI1|K4CMI1_SOLLC Uncharacterized protein OS=Solanum lycopersicum PE=4 SV=1;
7.02608	7.16548	7.71187	7.31633	7.21264	7.15619	7.74367	6.76444							313	3	10	9	5.7	203.33	1806	0	16.11	538630000	7378400	235420	1088800	1252700	976290	1033100	753320	1957900	80941	0.128878	0.992095	-0.0857072	-0.0685764	K4CMI6;Q08304;Q08306	K4CMI6;Q08304	K4CMI6	'35.2'	'not assigned.unknown'	' (original description: Uncharacterized protein OS=Solanum lycopersicum OX=4081 PE=4 SV=1)'	not assigned	Unknown protein	Non-Secreted	Non-apoplastic	>tr|K4CMI6|K4CMI6_SOLLC Uncharacterized protein OS=Solanum lycopersicum PE=4 SV=1;>sp|Q08304|PPOB_SOLLC Polyphenol oxidase B, chloroplastic OS=Solanum lycopersicum PE=3 SV=1
6.98017	6.70436	6.93191	5.5	6.75367	6.94443	6.69797	5.5							315	1	4	4	5.1	88.541	783	0	11.574	142530000	3239400	285970	523250	250770	663900	638300	440590	418550	18036	0.0399124	1	-0.055092	-0.0372483	K4CMQ6	K4CMQ6	K4CMQ6	'23.3.3'	'nucleotide metabolism.salvage.NUDIX hydrolases'	(at1g79690 : 1111.0) nudix hydrolase homolog 3 (NUDT3); FUNCTIONS IN: dipeptidyl-peptidase activity, hydrolase activity; INVOLVED IN: proteolysis; LOCATED IN: cytosol, vacuole; EXPRESSED IN: 23 plant structures; EXPRESSED DURING: 13 growth stages; CONTAINS InterPro DOMAIN/s: NUDIX hydrolase domain-like (InterPro:IPR015797), Peptidase M49, dipeptidyl-peptidase III (InterPro:IPR005317), NUDIX hydro…	metabolism	Dipeptidyl-peptidase	Non-Secreted	Non-apoplastic	>tr|K4CMQ6|K4CMQ6_SOLLC Uncharacterized protein OS=Solanum lycopersicum PE=4 SV=1
7.27114	7.39361	7.45843	7.33818	7.27853	7.4004	7.40074	7.73265							316	1	3	3	5.8	66.157	589	0	13.755	592920000	19126000	658890	3110700	1581500	3158000	2627500	2931700	2477400	2580900	0.35964	0.981596	0.0877405	0.0793771	K4CNR8	K4CNR8	K4CNR8	'33.99'	'development.unspecified'	'(at4g12420 : 896.0) Encodes a protein of unknown function involved in directed root tip growth. It is a member of 19-member gene family and is distantly related structurally to the multiple-copper oxidases ascorbate oxidase and laccase, though it lacks the copper-binding domains. The protein is glycosylated and GPI-anchored. It is localized to the plasma membrane and the cell wall. The gene is e…	others	SKU5 similar	Convencional Secreted (SignP)	Apoplastic	>tr|K4CNR8|K4CNR8_SOLLC Uncharacterized protein OS=Solanum lycopersicum PE=4 SV=1
5.5	7.71573	7.89783	7.46601	7.61	8.08425	8.26062	7.1924							317	2	13	5	29.8	79.172	745	0	106.46	1729400000	50866000	40287	6797500	4346900	4369100	6119900	14595000	13894000	703140	0.481685	0.78976	0.641927	0.399838	K4CNY6;K4CNZ1	K4CNY6	K4CNY6	'29.5.1'	'protein.degradation.subtilases'	(at5g67360 : 490.0) Encodes a subtilisin-like serine protease essential for mucilage release from seed coats.; ARA12; FUNCTIONS IN: serine-type endopeptidase activity; INVOLVED IN: proteolysis, seed coat development, mucilage metabolic process involved seed coat development, mucilage extrusion from seed coat; LOCATED IN: extracellular region, apoplast, cell wall, plant-type cell wall; EXPRESSED I…	protein	Subtilase	Convencional Secreted (SignP)	Apoplastic	>tr|K4CNY6|K4CNY6_SOLLC Uncharacterized protein OS=Solanum lycopersicum PE=4 SV=1
5.5	7.36825	7.69138	7.57173	7.7301	8.0746	8.09107	7.25049							318	5	22	10	42.4	79.473	748	0	126.63	1493400000	48174000	4178.8	2799200	2929700	6039300	7747300	16530000	11407000	717980	0.655871	1	0.753723	0.485741	K4CNZ0;K4CIQ6;K4CIQ7;K4CIQ5;O65836	K4CNZ0	K4CNZ0	'29.5.1'	'protein.degradation.subtilases'	'(at5g67360 : 527.0) Encodes a subtilisin-like serine protease essential for mucilage release from seed coats.; ARA12; FUNCTIONS IN: serine-type endopeptidase activity; INVOLVED IN: proteolysis, seed coat development, mucilage metabolic process involved seed coat development, mucilage extrusion from seed coat; LOCATED IN: extracellular region, apoplast, cell wall, plant-type cell wall; EXPRESSED …	protein	Subtilase	Convencional Secreted (SignP)	Apoplastic	>tr|K4CNZ0|K4CNZ0_SOLLC Uncharacterized protein OS=Solanum lycopersicum PE=4 SV=1
6.73589	7.39728	7.98016	7.34978	6.90084	7.52499	7.86978	6.70157							319	1	6	6	37.6	17.506	157	0	39.422	788840000	87648000	708370	19598000	15478000	11841000	2219200	11755000	25045000	1003300	0.116567	0.985747	-0.116484	-0.0849195	K4CP59	K4CP59	K4CP59	'20.2'	'stress.abiotic'	(p14170|osmo_tobac : 162.0) Osmotin precursor - Nicotiana tabacum (Common tobacco) & (gnl|cdd|84687 : 156.0) no description available & (at4g11650 : 142.0) osmotin-like protein; osmotin 34 (OSM34); INVOLVED IN: defense response to fungus, incompatible interaction, response to salt stress, defense response to bacterium, incompatible interaction, response to other organism; LOCATED IN: endomembrane…	stress response	Thaumatin-like protein	Convencional Secreted (SignP)	Apoplastic	>tr|K4CP59|K4CP59_SOLLC Uncharacterized protein OS=Solanum lycopersicum PE=4 SV=1
8.34492	8.16806	8.43447	8.3834	8.70144	8.88254	8.78064	8.72013							320	4	7	4	48.4	26.704	246	0	109.9	10067000000	1258400000	37272000	45411000	62707000	97067000	307280000	412940000	201760000	93984000	3.08826	0.869143	0.438472	0.409482	K4CP63;Q01591;K4CP65;K4CP64	K4CP63;Q01591	K4CP63	'20.2'	'stress.abiotic'	'(p14170|osmo_tobac : 444.0) Osmotin precursor - Nicotiana tabacum (Common tobacco) & (at4g11650 : 310.0) osmotin-like protein; osmotin 34 (OSM34); INVOLVED IN: defense response to fungus, incompatible interaction, response to salt stress, defense response to bacterium, incompatible interaction, response to other organism; LOCATED IN: endomembrane system; EXPRESSED IN: 6 plant structures; EXPRESS…	stress response	Osmotin-like protein	Convencional Secreted (SignP)	Apoplastic	>tr|K4CP63|K4CP63_SOLLC Uncharacterized protein OS=Solanum lycopersicum PE=4 SV=1;>sp|Q01591|TPM1_SOLLC Osmotin-like protein TPM-1 (Fragment) OS=Solanum lycopersicum GN=TPM-1 PE=2 SV=1
8.50991	8.39905	8.36532	8.45738	8.50122	8.42223	8.33566	8.74871							323	1	11	11	34.6	52.895	483	0	140.68	7241400000	452590000	30896000	59972000	32626000	84491000	83114000	64062000	37189000	60240000	0.307562	0.994949	0.0690379	0.0630777	K4CPE5	K4CPE5	K4CPE5	'10.6.3'	'cell wall.degradation.pectate lyases and polygalacturonases'	(at4g23500 : 710.0) Pectin lyase-like superfamily protein; FUNCTIONS IN: polygalacturonase activity; INVOLVED IN: carbohydrate metabolic process; LOCATED IN: cell wall; CONTAINS InterPro DOMAIN/s: Pectin lyase fold/virulence factor (InterPro:IPR011050), Glycoside hydrolase, family 28 (InterPro:IPR000743), Pectin lyase fold (InterPro:IPR012334), Parallel beta-helix repeat (InterPro:IPR006626); BES…	cell wall	Pectin lyase	Convencional Secreted (SignP)	Non-apoplastic	>tr|K4CPE5|K4CPE5_SOLLC Uncharacterized protein OS=Solanum lycopersicum PE=3 SV=1
6.47239	5.5	6.534	6.53505	6.64837	6.59175	6.37403	5.5							324	1	3	3	5.9	65.455	581	0	2.612	78577000	2910300	65588	424460	292480	466000	722300	508990	360960	69483	0.0167399	0.999368	0.0181781	0.0132898	K4CPT2	K4CPT2	K4CPT2	'3.2.4'	'minor CHO metabolism.trehalose.trehalase'	'(at4g24040 : 603.0) Encodes a trehalase, member of Glycoside Hydrolase Family 37.; trehalase 1 (TRE1); CONTAINS InterPro DOMAIN/s: Glycoside hydrolase, family 37 (InterPro:IPR001661), Six-hairpin glycosidase-like (InterPro:IPR008928), Glycoside hydrolase, family 37, conserved site (InterPro:IPR018232); Has 1925 Blast hits to 1909 proteins in 569 species: Archae - 2; Bacteria - 1056; Metazoa - 50…	metabolism	Trehalase	Convencional Secreted (SignP)	Non-apoplastic	>tr|K4CPT2|K4CPT2_SOLLC Trehalase OS=Solanum lycopersicum PE=3 SV=1
6.92156	7.41953	7.69945	7.49571	6.85303	7.49827	7.68161	6.34345							327	1	2	2	28.3	13.477	120	0	14.768	675650000	225220000	3711100	35361000	48631000	37960000	15991000	31165000	51226000	1169200	0.359316	0.842837	-0.289971	-0.215036	K4CQ91	K4CQ91	K4CQ91	'20.1'	'stress.biotic'	(p11670|prb1_tobac : 135.0) Basic form of pathogenesis-related protein 1 precursor (PRP 1) - Nicotiana tabacum (Common tobacco) & (at2g14610 : 115.0) PR1 gene expression is induced in response to a variety of pathogens. It is a useful molecular marker for the SAR response. Though the Genbank record for the cDNA associated to this gene is called 'PR-1-like', the sequence actually corresponds to PR…	stress response	Pathogenesis-related protein 1 precursor (PRP 1)	Convencional Secreted (SignP)	Apoplastic	>tr|K4CQ91|K4CQ91_SOLLC Uncharacterized protein OS=Solanum lycopersicum PE=3 SV=1
7.537	8.45465	8.29901	8.16752	7.91162	7.98261	8.09878	6.92413							329	1	18	15	67	36.726	324	0	128.39	3305800000	183650000	2769800	64766000	23063000	36483000	18508000	17930000	19642000	493750	0.526683	0.78837	-0.385261	-0.288008	K4CQE1	K4CQE1	K4CQE1	'26.12'	'misc.peroxidases'	'(at2g37130 : 476.0) Peroxidase superfamily protein; FUNCTIONS IN: peroxidase activity, heme binding; INVOLVED IN: defense response to fungus; EXPRESSED IN: 15 plant structures; EXPRESSED DURING: 7 growth stages; CONTAINS InterPro DOMAIN/s: Haem peroxidase (InterPro:IPR010255), Plant peroxidase (InterPro:IPR000823), Haem peroxidase, plant/fungal/bacterial (InterPro:IPR002016); BEST Arabidopsis th…	peroxidases	Peroxidase	Convencional Secreted (SignP)	Non-apoplastic	>tr|K4CQE1|K4CQE1_SOLLC Peroxidase OS=Solanum lycopersicum PE=3 SV=1
8.0714	7.8125	7.88361	7.93624	7.84415	7.94093	7.96672	8.10836							330	2	2	2	8.8	26.135	239	0	66.002	1913800000	273410000	19207000	30358000	17211000	54944000	36693000	45207000	38407000	31379000	0.200037	1	0.0391036	0.0362985	K4CQF5;K4CQF4	K4CQF5;K4CQF4	K4CQF5	'10.5.1.1'	'cell wall.cell wall proteins.AGPs.AGP'	'(at5g60490 : 181.0) FASCICLIN-like arabinogalactan-protein 12 (FLA12); LOCATED IN: plasma membrane, anchored to membrane; EXPRESSED IN: 22 plant structures; EXPRESSED DURING: 13 growth stages; CONTAINS InterPro DOMAIN/s: FAS1 domain (InterPro:IPR000782); BEST Arabidopsis thaliana protein match is: FASCICLIN-like arabinogalactan-protein 11 (TAIR:AT5G03170.1); Has 1807 Blast hits to 1807 proteins …	cell wall	FASCICLIN-like arabinogalactan protein	Convencional Secreted (SignP)	Apoplastic	>tr|K4CQF5|K4CQF5_SOLLC Uncharacterized protein OS=Solanum lycopersicum PE=4 SV=1;>tr|K4CQF4|K4CQF4_SOLLC Uncharacterized protein OS=Solanum lycopersicum PE=4 SV=1
7.09311	6.70805	6.8571	6.89922	6.39461	6.5544	6.95141	6.28477							332	3	4	4	15.6	38.453	358	0	82.841	131660000	5724400	570890	1520700	715070	1022200	482380	640680	694540	78003	1.07347	0.81408	-0.343068	-0.294198	K4D3E4;K4CQV5;K4CHR6	K4D3E4;K4CQV5	K4D3E4	'1.3.6'	'PS.calvin cycle.aldolase'	'(gnl|cdd|84661 : 619.0) no description available & (at2g36460 : 602.0) Aldolase superfamily protein; FUNCTIONS IN: copper ion binding; INVOLVED IN: response to salt stress, pentose-phosphate shunt; LOCATED IN: mitochondrion, plasma membrane, membrane; EXPRESSED IN: 24 plant structures; EXPRESSED DURING: 14 growth stages; CONTAINS InterPro DOMAIN/s: Aldolase-type TIM barrel (InterPro:IPR013785), …	others	Fructose-bisphosphate aldolase	Non-Secreted	Non-apoplastic	>tr|K4D3E4|K4D3E4_SOLLC Fructose-bisphosphate aldolase OS=Solanum lycopersicum PE=3 SV=1;>tr|K4CQV5|K4CQV5_SOLLC Fructose-bisphosphate aldolase OS=Solanum lycopersicum PE=3 SV=1
7.25174	7.82482	7.86608	7.33586	6.94105	7.73977	7.65998	6.77188							333	2	12	12	36	47.035	433	0	35.435	892300000	33048000	903080	8444800	3980100	3433000	1526900	7337900	7246700	175530	0.443854	0.810892	-0.291451	-0.225225	Q43497;K4CQW8	Q43497;K4CQW8	Q43497	'21.2'	'redox.ascorbate and glutathione'	(q42711|mdars_cucsa : 664.0) Monodehydroascorbate reductase, seedling isozyme (EC 1.6.5.4) (MDAR seedling) (Ascorbate free radical reductase seedling) (AFR reductase seedling) - Cucumis sativus (Cucumber) & (at3g52880 : 661.0) Encodes a peroxisomal monodehydroascorbate reductase, involved in the ascorbate-glutathione cycle which removes toxic H2O2; monodehydroascorbate reductase 1 (MDAR1); CONTAI…	redox	Monodehydroascorbate reductase	Non-Secreted	Non-apoplastic	>sp|Q43497|MDAR_SOLLC Monodehydroascorbate reductase OS=Solanum lycopersicum GN=AFRR PE=1 SV=1;>tr|K4CQW8|K4CQW8_SOLLC Uncharacterized protein OS=Solanum lycopersicum PE=4 SV=1
7.13043	7.11207	7.14922	7.4993	7.09726	7.1807	7.20731	6.69462							335	1	5	5	32.5	27.564	255	0	16.036	400260000	25016000	751470	2618300	1756400	9466000	3600200	2862700	3469000	492330	0.548095	0.892217	-0.177782	-0.154485	K4CRB9	K4CRB9	K4CRB9	'29.5'	'protein.degradation'	'(at2g37660 : 422.0) NAD(P)-binding Rossmann-fold superfamily protein; FUNCTIONS IN: copper ion binding; INVOLVED IN: defense response to bacterium; LOCATED IN: thylakoid, apoplast, chloroplast stroma, chloroplast; EXPRESSED IN: 24 plant structures; EXPRESSED DURING: 15 growth stages; CONTAINS InterPro DOMAIN/s: 3-beta hydroxysteroid dehydrogenase/isomerase (InterPro:IPR002225), NAD(P)-binding do…	protein	NAD(P)-binding protein	Leaderless Secreted	Non-apoplastic	>tr|K4CRB9|K4CRB9_SOLLC Uncharacterized protein OS=Solanum lycopersicum PE=4 SV=1
7.55376	6.6468	6.51175	5.5	6.71394	6.38696	6.4513	5.5							336	1	3	3	12.2	37.92	335	0	3.4611	126050000	6302600	1556400	1058100	330280	434690	2209500	294330	284740	134550	0.236313	0.82339	-0.290026	-0.193814	K4CRS5	K4CRS5	K4CRS5	'10.6.3'	'cell wall.degradation.pectate lyases and polygalacturonases'	(at5g06870 : 306.0) Encodes a polygalacturonase inhibiting protein involved in plant defense response. PGIPs inhibit the activity of pectin degrading enzymes such as those produced by fungal pathogens. PGIP2 is induced by fungal infection and methyl jasmonate.; polygalacturonase inhibiting protein 2 (PGIP2); FUNCTIONS IN: polygalacturonase inhibitor activity; INVOLVED IN: response to salt stress,…	cell wall	Polygalacturonase inhibiting protein	Convencional Secreted (SignP)	Apoplastic	>tr|K4CRS5|K4CRS5_SOLLC Uncharacterized protein OS=Solanum lycopersicum PE=4 SV=1
7.98727	8.20626	8.2217	8.2441	8.33092	8.03826	8.12697	7.82241							343	2	20	18	35.2	61.8	549	0	136.96	3652300000	125940000	6305000	21844000	11006000	28125000	24619000	15085000	15731000	3227500	0.293992	0.973502	-0.0851917	-0.0759885	K4CUU2;K4B7V1	K4CUU2	K4CUU2	'26.8'	'misc.nitrilases, *nitrile lyases, berberine bridge enzymes, reticuline oxidases, troponine reductases'	'(at1g30760 : 667.0) FAD-binding Berberine family protein; FUNCTIONS IN: electron carrier activity, oxidoreductase activity, FAD binding, catalytic activity; LOCATED IN: endomembrane system; EXPRESSED IN: inflorescence meristem, root, flower, pedicel; EXPRESSED DURING: 4 anthesis, petal differentiation and expansion stage; CONTAINS InterPro DOMAIN/s: FAD-binding, type 2 (InterPro:IPR016166), Berb…	metabolism	FAD-binding protein	Convencional Secreted (SignP)	Non-apoplastic	>tr|K4CUU2|K4CUU2_SOLLC Uncharacterized protein OS=Solanum lycopersicum PE=4 SV=1
7.83992	7.70653	7.69501	7.80759	7.57341	7.76402	7.90892	8.25703							344	1	7	7	13.8	52.038	480	0	38.707	1501000000	83390000	4158000	9194100	4946100	14387000	10162000	10327000	15104000	15111000	0.323751	0.976364	0.113582	0.0988609	K4CVC3	K4CVC3	K4CVC3	'10.6.3'	'cell wall.degradation.pectate lyases and polygalacturonases'	'(at3g16850 : 516.0) Pectin lyase-like superfamily protein; FUNCTIONS IN: polygalacturonase activity; INVOLVED IN: carbohydrate metabolic process; LOCATED IN: vacuole, plant-type cell wall; EXPRESSED IN: 23 plant structures; EXPRESSED DURING: 13 growth stages; CONTAINS InterPro DOMAIN/s: Pectin lyase fold/virulence factor (InterPro:IPR011050), Glycoside hydrolase, family 28 (InterPro:IPR000743), …	cell wall	Pectin lyase	Leaderless Secreted	Non-apoplastic	>tr|K4CVC3|K4CVC3_SOLLC Uncharacterized protein OS=Solanum lycopersicum PE=3 SV=1
8.70734	8.35853	8.53408	8.49776	8.39347	8.5397	8.48161	8.77171							345	1	3	3	15.8	19.636	183	0	18.488	7445900000	1241000000	85623000	197340000	113090000	225940000	154910000	182370000	129840000	151880000	0.0736309	1	0.0221999	0.0200345	K4CVF8	K4CVF8	K4CVF8	'26.19'	'misc.plastocyanin-like'	'(at5g26330 : 166.0) Cupredoxin superfamily protein; FUNCTIONS IN: electron carrier activity, copper ion binding; LOCATED IN: anchored to membrane; EXPRESSED IN: 16 plant structures; EXPRESSED DURING: 10 growth stages; CONTAINS InterPro DOMAIN/s: Plastocyanin-like (InterPro:IPR003245), Cupredoxin (InterPro:IPR008972); BEST Arabidopsis thaliana protein match is: Cupredoxin superfamily protein (TAI…	redox	Cupredoxin	Convencional Secreted (SignP)	Non-apoplastic	>tr|K4CVF8|K4CVF8_SOLLC Uncharacterized protein OS=Solanum lycopersicum PE=4 SV=1
7.00208	7.29086	7.15296	7.42027	6.95996	7.25737	7.19723	6.64614							348	2	7	7	35.8	35.383	332	0	29.146	389620000	22919000	775880	4398500	1999300	5893300	2049700	4332800	3121700	347410	0.570235	0.864203	-0.20137	-0.172797	K4CW40;Q645N0	K4CW40	K4CW40	'8.2.9'	'TCA / org transformation.other organic acid transformatons.cyt MDH'	'(o48905|mdhc_medsa : 604.0) Malate dehydrogenase, cytoplasmic (EC 1.1.1.37) - Medicago sativa (Alfalfa) & (at1g04410 : 603.0) Lactate/malate dehydrogenase family protein; FUNCTIONS IN: in 6 functions; INVOLVED IN: response to cadmium ion, response to zinc ion, response to salt stress; LOCATED IN: in 7 components; EXPRESSED IN: 26 plant structures; EXPRESSED DURING: 15 growth stages; CONTAINS Int…	metabolism	Malate dehydrogenase	Non-Secreted	Non-apoplastic	>tr|K4CW40|K4CW40_SOLLC Malate dehydrogenase OS=Solanum lycopersicum PE=3 SV=1
7.31551	6.91469	7.02878	7.48825	7.02869	6.93207	7.12956	7.07889							350	1	8	8	20.7	49.381	454	0	5.477	318240000	16750000	1671700	1489400	1183100	4015900	3503100	1776500	2377000	733180	0.475457	0.895897	-0.144504	-0.127007	K4CWL0	K4CWL0	K4CWL0	'21.2.2'	'redox.ascorbate and glutathione.glutathione'	'(q43154|gshrp_spiol : 753.0) Glutathione reductase, chloroplast precursor (EC 1.8.1.7) (GR) (GRase) (Fragment) - Spinacia oleracea (Spinach) & (at3g24170 : 741.0) Encodes a cytosolic glutathione reductase.; glutathione-disulfide reductase (GR1); FUNCTIONS IN: NADP or NADPH binding, glutathione-disulfide reductase activity, oxidoreductase activity, FAD binding; INVOLVED IN: oxidation reduction, g…	redox	Glutathione reductase	Non-Secreted	Non-apoplastic	>tr|K4CWL0|K4CWL0_SOLLC Uncharacterized protein OS=Solanum lycopersicum PE=3 SV=1
6.46567	6.93924	6.92356	6.45586	6.59417	6.54995	6.92553	6.23216							351	1	4	4	6.5	99.8	892	0	3.6631	126730000	2696500	56585	702190	292470	345230	496020	297360	445020	61595	0.250483	0.982442	-0.120629	-0.100823	K4CWP2	K4CWP2	K4CWP2	'26.3.2'	'misc.gluco-, galacto- and mannosidases.beta-galactosidase'	'(at2g32810 : 1286.0) putative beta-galactosidase; beta galactosidase 9 (BGAL9); FUNCTIONS IN: cation binding, sugar binding, beta-galactosidase activity, hydrolase activity, hydrolyzing O-glycosyl compounds, catalytic activity; INVOLVED IN: carbohydrate metabolic process; EXPRESSED IN: 25 plant structures; EXPRESSED DURING: 13 growth stages; CONTAINS InterPro DOMAIN/s: Glycoside hydrolase, famil…	cell wall	Beta-galactosidase	Convencional Secreted (SignP)	Non-apoplastic	>tr|K4CWP2|K4CWP2_SOLLC Beta-galactosidase OS=Solanum lycopersicum PE=3 SV=1
6.78017	6.83907	5.5	6.89854	6.96694	6.82805	6.55786	7.33007							352	1	4	4	11.6	52.624	483	0	12.366	161050000	11504000	395120	1461700	141990	1333500	2734100	1832200	578670	3026400	0.514109	0.799149	0.416284	0.303375	K4CX04	K4CX04	K4CX04	'29.5.4'	'protein.degradation.aspartate protease'	'(at1g05840 : 587.0) Eukaryotic aspartyl protease family protein; FUNCTIONS IN: aspartic-type endopeptidase activity; INVOLVED IN: proteolysis; LOCATED IN: anchored to membrane; EXPRESSED IN: 23 plant structures; EXPRESSED DURING: 15 growth stages; CONTAINS InterPro DOMAIN/s: Peptidase aspartic, catalytic (InterPro:IPR009007), Peptidase aspartic (InterPro:IPR021109), Peptidase A1 (InterPro:IPR001…	protein	Aspartyl protease	Convencional Secreted (SignP)	Apoplastic	>tr|K4CX04|K4CX04_SOLLC Uncharacterized protein OS=Solanum lycopersicum PE=3 SV=1
5.5	5.88783	5.5	6.18679	6.2336	5.92008	5.5	5.5							353	1	2	2	9.1	35.562	319	0	12.982	27301000	2100100	170250	267150	133170	501780	510120	300480	159530	57576	0.0277495	0.992415	0.0197673	0.0158882	K4CX24	K4CX24	K4CX24	'20.1'	'stress.biotic'	'(at1g05850 : 479.0) Encodes an endo chitinase-like protein AtCTL1. Essential for tolerance to heat, salt and drought stresses. Also involved in root hair development, cell expansion and response to cytokinin. Allelic to erh2. 11 alleles described in Hauser (1995). Mutant is defective in acquired thermotolerance, appears semidwarf throughout its life cycle and has extra lateral branches. There ar…	stress response	Chitinase	Convencional Secreted (SignP)	Apoplastic	>tr|K4CX24|K4CX24_SOLLC Uncharacterized protein OS=Solanum lycopersicum PE=3 SV=1
8.41845	8.78301	8.73381	8.74827	8.57947	8.77225	8.76483	9.16403							354	2	12	12	36.6	44.208	415	0	213.16	14800000000	1138500000	37060000	211740000	89040000	208030000	106130000	147590000	151170000	187690000	0.448215	0.905867	0.149261	0.129862	K4CXC8;K4DBE8	K4CXC8	K4CXC8	'10.5.1.1'	'cell wall.cell wall proteins.AGPs.AGP'	'(at5g55730 : 405.0) fasciclin-like arabinogalactan-protein 1 (Fla1); FASCICLIN-like arabinogalactan 1 (FLA1); CONTAINS InterPro DOMAIN/s: FAS1 domain (InterPro:IPR000782); BEST Arabidopsis thaliana protein match is: FASCICLIN-like arabinogalactan 2 (TAIR:AT4G12730.1). & (reliability: 810.0) & (original description: Uncharacterized protein OS=Solanum lycopersicum PE=4 SV=1)'	cell wall	FASCICLIN-like arabinogalactan protein	Convencional Secreted (SignP)	Apoplastic	>tr|K4CXC8|K4CXC8_SOLLC Uncharacterized protein OS=Solanum lycopersicum PE=4 SV=1
7.45286	7.66218	7.54641	7.78954	7.46382	7.74076	7.66444	8.28794							355	1	8	8	18.6	28.376	274	0	72.048	1406200000	140620000	3911700	19856000	4765600	30203000	12363000	22393000	13552000	33571000	0.408602	0.924515	0.176495	0.148233	K4CXN7	K4CXN7	K4CXN7	'26.19'	'misc.plastocyanin-like'	'(at5g53870 : 136.0) early nodulin-like protein 1 (ENODL1); FUNCTIONS IN: electron carrier activity, copper ion binding; LOCATED IN: plasma membrane, anchored to membrane; EXPRESSED IN: 22 plant structures; EXPRESSED DURING: 9 growth stages; CONTAINS InterPro DOMAIN/s: Plastocyanin-like (InterPro:IPR003245), Cupredoxin (InterPro:IPR008972); BEST Arabidopsis thaliana protein match is: early noduli…	redox	Plastocyanin-like/Cupredoxin	Convencional Secreted (SignP)	Apoplastic	>tr|K4CXN7|K4CXN7_SOLLC Uncharacterized protein OS=Solanum lycopersicum PE=4 SV=1
7.46443	6.52657	6.28287	6.33838	6.92756	6.44835	6.41709	6.71347							356	2	5	5	13.8	49.47	458	0	7.3337	121120000	5767600	1170300	917560	148900	590020	1327600	575900	370130	667120	0.0302334	1	-0.026446	-0.020334	K4CYB7;K4AZZ3	K4CYB7	K4CYB7	'29.5.4'	'protein.degradation.aspartate protease'	'(at1g01300 : 545.0) Eukaryotic aspartyl protease family protein; FUNCTIONS IN: aspartic-type endopeptidase activity; INVOLVED IN: proteolysis, response to karrikin; LOCATED IN: membrane, plant-type cell wall; EXPRESSED IN: 22 plant structures; EXPRESSED DURING: 13 growth stages; CONTAINS InterPro DOMAIN/s: Peptidase aspartic (InterPro:IPR021109), Peptidase aspartic, catalytic (InterPro:IPR009007…	protein	Aspartyl protease	Convencional Secreted (SignP)	Apoplastic	>tr|K4CYB7|K4CYB7_SOLLC Uncharacterized protein OS=Solanum lycopersicum PE=3 SV=1
7.78897	7.99862	7.92858	7.89169	8.00578	7.85708	7.88974	7.89316							358	1	15	15	51.4	45.828	416	0	71.312	1891500000	90072000	7161900	11674000	6143500	10870000	22821000	18115000	8991000	4296500	0.0616844	0.997436	0.00947511	0.00898578	K4CZD6	K4CZD6	K4CZD6	'10.8.2'	'cell wall.pectin*esterases.acetyl esterase'	(gnl|cdd|39488 : 621.0) no description available & (gnl|cdd|66926 : 593.0) no description available & (at2g46930 : 575.0) Pectinacetylesterase family protein; FUNCTIONS IN: carboxylesterase activity; LOCATED IN: endomembrane system; EXPRESSED IN: 22 plant structures; EXPRESSED DURING: 13 growth stages; CONTAINS InterPro DOMAIN/s: Pectinacetylesterase (InterPro:IPR004963); BEST Arabidopsis thalian…	cell wall	Pectinacetylesterase	Convencional Secreted (SignP)	Non-apoplastic	>tr|K4CZD6|K4CZD6_SOLLC Uncharacterized protein OS=Solanum lycopersicum PE=4 SV=1
8.8258	8.6312	8.22217	8.46228	8.76346	8.69286	8.5912	9.08275							359	1	25	25	51.7	52.566	478	0	274.82	10863000000	402330000	33510000	53135000	11940000	43252000	88846000	64004000	41236000	66405000	0.7262	0.848727	0.247203	0.211943	K4D0Y5	K4D0Y5	K4D0Y5	'20.1.7'	'stress.biotic.PR-proteins'	'(at1g33590 : 533.0) Leucine-rich repeat (LRR) family protein; INVOLVED IN: signal transduction, response to karrikin, defense response; LOCATED IN: cell wall, chloroplast, plant-type cell wall; EXPRESSED IN: 22 plant structures; EXPRESSED DURING: 14 growth stages; CONTAINS InterPro DOMAIN/s: Leucine-rich repeat, typical subtype (InterPro:IPR003591), Leucine-rich repeat-containing N-terminal doma…	stress response	Leucine-rich repeat (LRR) protein	Convencional Secreted (SignP)	Apoplastic	>tr|K4D0Y5|K4D0Y5_SOLLC Uncharacterized protein OS=Solanum lycopersicum PE=4 SV=1
8.44052	8.27235	8.37214	8.46636	8.30882	8.39515	8.40741	7.876							361	1	12	6	45.9	35.405	329	0	177.5	4914000000	307120000	25746000	42676000	33364000	66122000	42577000	46704000	43394000	6540100	0.48247	0.901758	-0.140998	-0.124467	K4D1H0	K4D1H0	K4D1H0	'20.1'	'stress.biotic'	'(p52405|chi3_soltu : 492.0) Endochitinase 3 precursor (EC 3.2.1.14) (Fragment) - Solanum tuberosum (Potato) & (gnl|cdd|84590 : 401.0) no description available & (at3g12500 : 387.0) encodes a basic chitinase involved in ethylene/jasmonic acid mediated signalling pathway during systemic acquired resistance based on expression analyses.; basic chitinase (HCHIB); FUNCTIONS IN: chitinase activity; IN…	stress response	Chitinase	Convencional Secreted (SignP)	Apoplastic	>tr|K4D1H0|K4D1H0_SOLLC Uncharacterized protein OS=Solanum lycopersicum PE=3 SV=1
6.83202	7.44989	7.86662	7.65782	7.35021	7.54863	7.8489	7.06659							363	5	10	7	49.1	34.491	322	0	49.991	824780000	63445000	3253700	5229000	8433800	11673000	7317000	10632000	15638000	1269000	0.00239734	0.995948	0.00199604	0.0015624	K4D1N6;K4D1N8;K4D1N1;K4D1M5;K4D1N2	K4D1N6	K4D1N6	'20.1'	'stress.biotic'	'(p05315|chit_soltu : 491.0) Endochitinase precursor (EC 3.2.1.14) - Solanum tuberosum (Potato) & (gnl|cdd|84590 : 400.0) no description available & (at3g12500 : 378.0) encodes a basic chitinase involved in ethylene/jasmonic acid mediated signalling pathway during systemic acquired resistance based on expression analyses.; basic chitinase (HCHIB); FUNCTIONS IN: chitinase activity; INVOLVED IN: re…	stress response	Chitinase	Convencional Secreted (SignP)	Apoplastic	>tr|K4D1N6|K4D1N6_SOLLC Uncharacterized protein OS=Solanum lycopersicum PE=3 SV=1
5.5	6.43035	6.11797	6.58678	6.45588	5.5	6.46081	6.6406							364	1	2	2	8.2	34.656	316	0	1.6006	65151000	6515100	293230	818960	274880	1969700	995400	632410	738090	792450	0.110752	0.986412	0.105548	0.0780217	K4D1S4	K4D1S4	K4D1S4	'35.2'	'not assigned.unknown'	'(gnl|cdd|70178 : 249.0) no description available & (at3g08600 : 207.0) Protein of unknown function (DUF1191); FUNCTIONS IN: molecular_function unknown; INVOLVED IN: biological_process unknown; LOCATED IN: plasma membrane; EXPRESSED IN: 23 plant structures; EXPRESSED DURING: 13 growth stages; CONTAINS InterPro DOMAIN/s: Protein of unknown function DUF1191 (InterPro:IPR010605); BEST Arabidopsis th…	not assigned	Unknown protein	Convencional Secreted (SignP)	Non-apoplastic	>tr|K4D1S4|K4D1S4_SOLLC Uncharacterized protein OS=Solanum lycopersicum PE=4 SV=1
8.28194	8.09635	8.06822	7.49634	7.5905	7.52856	7.93993	7.20674							365	1	10	10	23.8	50.493	449	0	68.044	1505200000	68419000	11336000	20228000	7505900	6168100	6272600	4506600	11570000	831720	0.943168	0.793081	-0.41928	-0.341771	K4D1T4	K4D1T4	K4D1T4	'10.6.2'	'cell wall.degradation.mannan-xylose-arabinose-fucose'	'(at5g01930 : 659.0) Glycosyl hydrolase superfamily protein; FUNCTIONS IN: cation binding, hydrolase activity, hydrolyzing O-glycosyl compounds, catalytic activity; INVOLVED IN: carbohydrate metabolic process; LOCATED IN: endomembrane system; EXPRESSED IN: 19 plant structures; EXPRESSED DURING: 10 growth stages; CONTAINS InterPro DOMAIN/s: Glycoside hydrolase, catalytic core (InterPro:IPR017853),…	cell wall	Glycosyl hydrolase	Convencional Secreted (SignP)	Apoplastic	>tr|K4D1T4|K4D1T4_SOLLC Uncharacterized protein OS=Solanum lycopersicum PE=3 SV=1
6.99978	6.9964	6.82844	7.15594	7.02317	6.49657	6.66973	6.93232							367	5	4	3	19.4	35.075	319	0	21.37	168230000	9346300	1530800	1474500	363050	2701100	1658800	532230	521190	564600	0.76767	0.809766	-0.214695	-0.188662	K4D1W4;K4D1W3;K4CSC2;K4D1V3;K4D1W6	K4D1W4;K4D1W3	K4D1W4	'26.9'	'misc.glutathione S transferases'	'(gnl|cdd|29388 : 413.0) no description available & (p22195|per1_arahy : 323.0) Cationic peroxidase 1 precursor (EC 1.11.1.7) (PNPC1) - Arachis hypogaea (Peanut) & (at5g05340 : 303.0) Peroxidase superfamily protein; FUNCTIONS IN: protein binding, peroxidase activity; INVOLVED IN: response to oxidative stress, oxidation reduction; LOCATED IN: apoplast, cell wall; EXPRESSED IN: 9 plant structures; …	redox	Peroxidase	Convencional Secreted (SignP)	Non-apoplastic	>tr|K4D1W4|K4D1W4_SOLLC Peroxidase OS=Solanum lycopersicum PE=3 SV=1;>tr|K4D1W3|K4D1W3_SOLLC Peroxidase OS=Solanum lycopersicum PE=3 SV=1
8.28201	8.21064	8.63679	8.14947	8.8965	8.72149	8.91901	7.96058							369	1	13	12	51.7	37.801	344	0	137.96	9696500000	745880000	25169000	49431000	67720000	44907000	208350000	142980000	196110000	11206000	0.568987	0.808333	0.304669	0.243613	K4D2M7	K4D2M7	K4D2M7	'26.4.1'	'misc.beta 1,3 glucan hydrolases.glucan endo-1,3-beta-glucosidase'	(p36401|e13h_tobac : 497.0) Glucan endo-1,3-beta-glucosidase, acidic isoform PR-Q' precursor (EC 3.2.1.39) ((1->3)-beta-glucan endohydrolase) ((1->3)-beta-glucanase) (Beta-1,3-endoglucanase) (PR-35) - Nicotiana tabacum (Common tobacco) & (gnl|cdd|84700 : 410.0) no description available & (at3g57270 : 330.0) encodes a member of glycosyl hydrolase family 17; "beta-1,3-glucanase 1" (BG1); FUNCTIONS …	stress response	Glucan endo-1,3-beta-glucosidase	Convencional Secreted (SignP)	Apoplastic	>tr|K4D2M7|K4D2M7_SOLLC Uncharacterized protein OS=Solanum lycopersicum PE=3 SV=1
9.34751	9.13975	9.35344	9.46374	9.34425	9.05212	9.25744	8.818							370	1	50	36	61.6	84.724	765	0	323.31	42529000000	1012600000	73010000	126420000	116850000	269870000	179000000	81926000	134240000	31288000	0.756964	0.817053	-0.208157	-0.183341	K4D338	K4D338	K4D338	'13.1.3.4'	'amino acid metabolism.synthesis.aspartate family.methionine'	(q42699|mete_catro : 1380.0) 5-methyltetrahydropteroyltriglutamate--homocysteine methyltransferase (EC 2.1.1.14) (Vitamin-B12-independent methionine synthase isozyme) (Cobalamin-independent methionine synthase isozyme) - Catharanthus roseus (Rosy periwinkle) (Madag & (at5g17920 : 1371.0) Encodes a cytosolic cobalamin-independent methionine synthase, involved in methionine regeneration via the act…	metabolism	Methionine synthase	Non-Secreted	Non-apoplastic	>tr|K4D338|K4D338_SOLLC Uncharacterized protein OS=Solanum lycopersicum PE=3 SV=1
7.14953	7.33808	6.98579	7.59692	7.14635	7.19025	7.36012	7.59143							371	1	6	6	17.6	49.434	449	0	37.404	516220000	34415000	1519100	5581300	1726900	9819000	3158600	4399000	5054500	3156300	0.122961	1	0.0544584	0.0467218	K4D358	K4D358	K4D358	'10.5.1.1'	'cell wall.cell wall proteins.AGPs.AGP'	(at5g06390 : 575.0) FASCICLIN-like arabinogalactan protein 17 precursor (FLA17); FUNCTIONS IN: molecular_function unknown; INVOLVED IN: cell adhesion; LOCATED IN: vacuole; EXPRESSED IN: guard cell; CONTAINS InterPro DOMAIN/s: FAS1 domain (InterPro:IPR000782); BEST Arabidopsis thaliana protein match is: FASCICLIN-like arabinogalactan protein 18 precursor (TAIR:AT3G11700.1); Has 803 Blast hits to 7…	cell wall	FASCICLIN-like arabinogalactan protein	Convencional Secreted (SignP)	Non-apoplastic	>tr|K4D358|K4D358_SOLLC Uncharacterized protein OS=Solanum lycopersicum PE=4 SV=1
5.5	6.99299	6.88268	7.08661	5.5	6.87865	5.5	5.5							372	1	3	2	17.2	29.461	267	0	9.3747	170580000	14215000	1432200	2557300	812340	5758400	305610	2790600	558690	0	0.743612	1	-0.770907	-0.510964	K4D389	K4D389	K4D389	'21.5.1'	'redox.peroxiredoxin.BAS1'	'(at5g06290 : 391.0) Encodes a 2-Cys peroxiredoxin (2-Cys PrxB) that contains two catalytic Cys residues.; 2-cysteine peroxiredoxin B (2-Cys Prx B); FUNCTIONS IN: peroxiredoxin activity, antioxidant activity; INVOLVED IN: response to cold, defense response to bacterium; LOCATED IN: apoplast, stromule, chloroplast stroma, chloroplast; EXPRESSED IN: 23 plant structures; EXPRESSED DURING: 13 growth …	redox	Peroxiredoxin	Leaderless Secreted	Non-apoplastic	>tr|K4D389|K4D389_SOLLC Uncharacterized protein OS=Solanum lycopersicum PE=4 SV=1
6.6814	7.32909	6.7897	7.08962	6.67569	6.65887	6.80764	6.5586							375	1	9	6	36.8	37.287	329	0	46.145	223790000	13987000	444400	6257200	439690	3247300	1578800	1163600	641820	214030	0.980455	0.816615	-0.297255	-0.257236	K4D3L0	K4D3L0	K4D3L0	'26.12'	'misc.peroxidases'	'(at2g37130 : 455.0) Peroxidase superfamily protein; FUNCTIONS IN: peroxidase activity, heme binding; INVOLVED IN: defense response to fungus; EXPRESSED IN: 15 plant structures; EXPRESSED DURING: 7 growth stages; CONTAINS InterPro DOMAIN/s: Haem peroxidase (InterPro:IPR010255), Plant peroxidase (InterPro:IPR000823), Haem peroxidase, plant/fungal/bacterial (InterPro:IPR002016); BEST Arabidopsis th…	peroxidases	Peroxidase	Convencional Secreted (SignP)	Non-apoplastic	>tr|K4D3L0|K4D3L0_SOLLC Peroxidase OS=Solanum lycopersicum PE=3 SV=1
7.41113	7.36601	7.27397	7.43766	7.31877	7.26259	7.17992	7.73593							376	2	8	6	10.6	83.112	771	0	13.005	555900000	17372000	1122600	2907800	846850	3206400	2777500	1810200	1524800	3175600	0.00548175	1	0.00211346	0.00187202	K4D3L8;K4D3P2	K4D3L8;K4D3P2	K4D3L8	'29.5.1'	'protein.degradation.subtilases'	'(at5g67090 : 526.0) Subtilisin-like serine endopeptidase family protein; FUNCTIONS IN: identical protein binding, serine-type endopeptidase activity; INVOLVED IN: proteolysis, negative regulation of catalytic activity; LOCATED IN: endomembrane system; EXPRESSED IN: 9 plant structures; EXPRESSED DURING: 4 anthesis, petal differentiation and expansion stage, D bilateral stage; CONTAINS InterPro DO…	protein	Subtilase	Convencional Secreted (SignP)	Apoplastic	>tr|K4D3L8|K4D3L8_SOLLC Uncharacterized protein OS=Solanum lycopersicum PE=4 SV=1;>tr|K4D3P2|K4D3P2_SOLLC Uncharacterized protein OS=Solanum lycopersicum PE=4 SV=1
6.77888	6.47122	6.85759	6.71588	6.62431	6.5612	6.65787	6.71601							377	1	4	3	4.5	93.557	848	0	2.3426	103310000	2459700	208930	272920	277460	425910	469630	318020	366660	120170	0.311331	1	-0.0660435	-0.0606197	K4D3V6	K4D3V6	K4D3V6	'10.6'	'cell wall.degradation'	'(at5g34940 : 617.0) The protein is predicted (WoLF PSORT program) to be membrane-associated.; glucuronidase 3 (GUS3); FUNCTIONS IN: beta-glucuronidase activity; INVOLVED IN: biological_process unknown; LOCATED IN: plant-type cell wall; EXPRESSED IN: 22 plant structures; EXPRESSED DURING: 11 growth stages; CONTAINS InterPro DOMAIN/s: Glycoside hydrolase family 79, N-terminal (InterPro:IPR005199);…	cell wall	Glucuronidase	Leaderless Secreted	Non-apoplastic	>tr|K4D3V6|K4D3V6_SOLLC Uncharacterized protein OS=Solanum lycopersicum PE=3 SV=1
5.5	6.16616	7.03834	6.15773	5.5	6.45091	6.93973	5.5							379	1	3	3	15.8	24.863	215	0	40.095	72882000	6073500	0	521510	1148600	692140	0	1168500	2542700	0	0.0896732	0.983107	-0.117899	-0.0797632	K4D4G1	K4D4G1	K4D4G1	'35.2'	'not assigned.unknown'	' (original description: Uncharacterized protein OS=Solanum lycopersicum PE=4 SV=1)'	not assigned	Unknown protein	Convencional Secreted (SignP)	Non-apoplastic	>tr|K4D4G1|K4D4G1_SOLLC Uncharacterized protein OS=Solanum lycopersicum PE=4 SV=1
8.09107	8.62161	8.54963	8.62215	8.52985	8.61414	8.51631	8.71785							380	2	18	17	37	61.039	559	0	174.94	9032900000	376370000	6186900	75956000	27427000	74231000	57097000	59906000	42321000	33246000	0.398899	0.957325	0.123422	0.108646	K4D4J0;K4D4I8	K4D4J0	K4D4J0	'10.8.1'	cell wall.pectin*esterases.PME'	'(at5g09760 : 687.0) Plant invertase/pectin methylesterase inhibitor superfamily; FUNCTIONS IN: enzyme inhibitor activity, pectinesterase activity; INVOLVED IN: cell wall modification; LOCATED IN: cell wall, chloroplast, plant-type cell wall; EXPRESSED IN: 23 plant structures; EXPRESSED DURING: 13 growth stages; CONTAINS InterPro DOMAIN/s: Pectin lyase fold/virulence factor (InterPro:IPR011050), …	cell wall	Pectinesterase	Convencional Secreted (SignP)	Apoplastic	>tr|K4D4J0|K4D4J0_SOLLC Pectinesterase OS=Solanum lycopersicum PE=4 SV=1
6.84548	7.00715	5.5	7.04747	6.9343	6.94992	6.99291	5.5							383	1	4	4	14.5	37.695	337	0	11.43	205780000	10830000	572880	2095900	925230	2160300	2150400	1338500	1532500	54756	0.0036929	0.997115	-0.00574315	-0.0037804	K4D5H3	K4D5H3	K4D5H3	'26.12'	'misc.peroxidases'	'(at2g22420 : 503.0) Peroxidase superfamily protein; FUNCTIONS IN: peroxidase activity, heme binding; INVOLVED IN: oxidation reduction, response to oxidative stress; LOCATED IN: endomembrane system; EXPRESSED IN: 21 plant structures; EXPRESSED DURING: 12 growth stages; CONTAINS InterPro DOMAIN/s: Haem peroxidase (InterPro:IPR010255), Plant peroxidase (InterPro:IPR000823), Peroxidases heam-ligand …	peroxidases	Peroxidase	Convencional Secreted (SignP)	Non-apoplastic	>tr|K4D5H3|K4D5H3_SOLLC Peroxidase OS=Solanum lycopersicum PE=3 SV=1
5.5	6.82549	5.5	6.76579	6.70776	6.55374	5.5	5.5							385	2	3	3	9.4	51.818	477	0	6.7662	92990000	2999700	0	1119500	35555	1147300	90987	514300	92052	0	0.0585692	1	-0.0824459	-0.0550531	K4D601;K4C285	K4D601;K4C285	K4D601	'4.1.1'	'glycolysis.cytosolic branch.UGPase'	(p19595|ugpa_soltu : 858.0) UTP--glucose-1-phosphate uridylyltransferase (EC 2.7.7.9) (UDP-glucose pyrophosphorylase) (UDPGP) (UGPase) - Solanum tuberosum (Potato) & (at3g03250 : 721.0) Is thought to encode a cytosolic UDP-glucose pyrophosphorylase with strong similarity to potato UTP--glucose-1-phosphate uridylyltransferase. Downregulated by flooding.; UDP-GLUCOSE PYROPHOSPHORYLASE 1 (UGP1); FUN…	metabolism	UDP-glucose pyrophosphorylase	Non-Secreted	Non-apoplastic	>tr|K4D601|K4D601_SOLLC Uncharacterized protein OS=Solanum lycopersicum PE=4 SV=1;>tr|K4C285|K4C285_SOLLC Uncharacterized protein OS=Solanum lycopersicum PE=4 SV=1
7.60759	7.89034	7.65808	7.93707	7.65531	7.73846	7.53692	8.19346							386	1	4	4	16.5	43.128	413	0	89.38	1435600000	143560000	7125900	19389000	9992200	28505000	14515000	20508000	17095000	26434000	0.0158852	0.999442	0.0077672	0.00666445	K4D691	K4D691	K4D691	'35.1'	'not assigned.no ontology'	'(at1g21880 : 448.0) lysm domain GPI-anchored protein 1 precursor (LYM1); FUNCTIONS IN: molecular_function unknown; INVOLVED IN: cell wall macromolecule catabolic process; LOCATED IN: anchored to plasma membrane, plasma membrane, anchored to membrane; EXPRESSED IN: 24 plant structures; EXPRESSED DURING: 13 growth stages; CONTAINS InterPro DOMAIN/s: Peptidoglycan-binding lysin domain (InterPro:IPR…	not assigned	Peptidoglycan-binding lysin domain-containing protein	Convencional Secreted (SignP)	Apoplastic	>tr|K4D691|K4D691_SOLLC Uncharacterized protein OS=Solanum lycopersicum PE=4 SV=1
6.30835	6.1261	6.29802	6.05839	6.02865	6.34988	5.5	5.5							387	1	2	2	6.4	42.633	375	0	3.7046	37037000	1610300	78560	258800	118040	339110	241020	322530	204000	48248	0.802932	0.808615	-0.353082	-0.28974	K4D738	K4D738	K4D738	'35.2'	'not assigned.unknown'	(at5g41970 : 560.0) Metal-dependent protein hydrolase; FUNCTIONS IN: molecular_function unknown; INVOLVED IN: biological_process unknown; LOCATED IN: mitochondrion; EXPRESSED IN: 24 plant structures; EXPRESSED DURING: 13 growth stages; CONTAINS InterPro DOMAIN/s: Metal-dependent protein hydrolase (InterPro:IPR003226); BEST Arabidopsis thaliana protein match is: Metal-dependent protein hydrolase (…	not assigned	Protein hydrolase	Leaderless Secreted	Non-apoplastic	>tr|K4D738|K4D738_SOLLC Uncharacterized protein OS=Solanum lycopersicum PE=4 SV=1
7.13912	7.52502	6.87845	6.52141	6.62718	6.76123	6.71633	5.5							389	2	7	7	15.7	62.436	549	0	7.7948	229150000	8183900	433270	4001900	641400	589880	785400	1015200	697960	18921	0.834696	0.87975	-0.614816	-0.449246	K4D804;K4CDZ1	K4D804	K4D804	'35.1'	'not assigned.no ontology'	'(at4g38650 : 647.0) Glycosyl hydrolase family 10 protein; FUNCTIONS IN: cation binding, hydrolase activity, hydrolyzing O-glycosyl compounds, catalytic activity; INVOLVED IN: carbohydrate metabolic process; LOCATED IN: endomembrane system; CONTAINS InterPro DOMAIN/s: Glycoside hydrolase, family 10 (InterPro:IPR001000), Glycoside hydrolase, catalytic core (InterPro:IPR017853), Glycoside hydrolase…	not assigned	Glycosyl hydrolase	Convencional Secreted (SignP)	Non-apoplastic	>tr|K4D804|K4D804_SOLLC Uncharacterized protein OS=Solanum lycopersicum PE=4 SV=1
7.89755	7.64702	7.54216	7.79302	7.6431	7.60159	7.64931	7.37969							392	10	15	2	26.4	77.141	698	0	64.725	1101600000	28247000	2403900	5212100	2092400	6064100	5182200	3363900	3034000	894070	0.733777	0.901972	-0.151518	-0.137606	K4D9L5;P27322;K4D473;K4C9W3;K4D9L9;P24629;K4BLR5;K4CB53;W9LEB9;tr|A0A0D2XA80|A0A0D2XA80_FUSO4 Hsp70-like protein OS=Fusarium oxysporum f. sp. lycopersici (strain 4287 / CBS 123668 / FGSC 9935 / NRRL 34936) GN=FOXG_00795 PE=3 SV=1	K4D9L5;P27322;K4D473;K4C9W3;K4D9L9	K4D9L5	'29.6'	'protein.folding'	(p09189|hsp7c_pethy : 1100.0) Heat shock cognate 70 kDa protein - Petunia hybrida (Petunia) & (at3g12580 : 1087.0) heat shock protein 70 (HSP70); FUNCTIONS IN: ATP binding; INVOLVED IN: in 9 processes; LOCATED IN: cytosol, mitochondrion, cell wall, plasma membrane; EXPRESSED IN: 23 plant structures; EXPRESSED DURING: 11 growth stages; CONTAINS InterPro DOMAIN/s: Heat shock protein 70, conserved s…	protein	Heat shock protein Hsp70	Non-Secreted	Non-apoplastic	>tr|K4D9L5|K4D9L5_SOLLC Uncharacterized protein OS=Solanum lycopersicum PE=3 SV=1;>sp|P27322|HSP72_SOLLC Heat shock cognate 70 kDa protein 2 OS=Solanum lycopersicum GN=HSC-2 PE=2 SV=1;>tr|K4D473|K4D473_SOLLC Uncharacterized protein OS=Solanum lycopersicum
7.52147	7.32064	7.28475	7.37484	7.39935	7.40557	7.37528	7.73447							393	2	7	6	19.6	56.373	499	0	13.408	731340000	31798000	1940700	4042000	1821200	5659300	5124600	5269400	3650800	4289500	0.465642	0.965652	0.103242	0.0938453	K4D9N3;K4C4B4	K4D9N3	K4D9N3	'29.5'	'protein.degradation'	'(at3g45010 : 668.0) serine carboxypeptidase-like 48 (scpl48); FUNCTIONS IN: serine-type carboxypeptidase activity; INVOLVED IN: proteolysis; LOCATED IN: endomembrane system; EXPRESSED IN: 24 plant structures; EXPRESSED DURING: 13 growth stages; CONTAINS InterPro DOMAIN/s: Peptidase S10, serine carboxypeptidase (InterPro:IPR001563), Peptidase S10, serine carboxypeptidase, active site (InterPro:IP…	protein	Carboxypeptidase	Convencional Secreted (SignP)	Apoplastic	>tr|K4D9N3|K4D9N3_SOLLC Carboxypeptidase OS=Solanum lycopersicum PE=3 SV=1
7.74705	7.29385	5.5	6.96701	7.09788	7.00208	6.76647	7.21378							394	1	3	3	8.8	33.983	296	0	9.6471	322260000	18956000	3300800	3498500	581630	3164900	3393500	2714300	902330	1400200	0.10658	0.965591	0.143073	0.0956854	K4D9N5	K4D9N5	K4D9N5	'10.7'	'cell wall.modification'	'(at3g44990 : 363.0) xyloglucan endo-transglycosylase; xyloglucan endo-transglycosylase-related 8 (XTR8); FUNCTIONS IN: hydrolase activity, acting on glycosyl bonds, xyloglucan:xyloglucosyl transferase activity; INVOLVED IN: cell wall biogenesis; LOCATED IN: apoplast, cell wall; EXPRESSED IN: 11 plant structures; EXPRESSED DURING: 8 growth stages; CONTAINS InterPro DOMAIN/s: Xyloglucan endotransg…	cell wall	Xyloglucan endotransglucosylase/hydrolase	Convencional Secreted (SignP)	Non-apoplastic	>tr|K4D9N5|K4D9N5_SOLLC Xyloglucan endotransglucosylase/hydrolase OS=Solanum lycopersicum PE=3 SV=1
7.08325	7.67711	7.67985	7.5135	7.63441	7.6374	7.62343	7.55778							395	1	5	5	18.2	43.085	390	0	29.533	1049800000	65614000	629180	13310000	5085800	9716000	12870000	12392000	8655400	2955800	0.384541	0.958521	0.124827	0.109325	K4D9N7	K4D9N7	K4D9N7	'26.13'	'misc.acid and other phosphatases'	'(at5g63140 : 500.0) purple acid phosphatase 29 (PAP29); FUNCTIONS IN: protein serine/threonine phosphatase activity, acid phosphatase activity; LOCATED IN: endomembrane system; EXPRESSED IN: 23 plant structures; EXPRESSED DURING: 13 growth stages; CONTAINS InterPro DOMAIN/s: Metallophosphoesterase (InterPro:IPR004843), Phosphoesterase At2g46880 (InterPro:IPR011230); BEST Arabidopsis thaliana pro…	metabolism	Purple acid phosphatase	Convencional Secreted (SignP)	Non-apoplastic	>tr|K4D9N7|K4D9N7_SOLLC Uncharacterized protein OS=Solanum lycopersicum PE=4 SV=1
7.30767	5.5	6.81958	5.5	6.68193	6.71062	6.80613	6.56101							396	1	2	2	3.9	51.047	460	0	1.9427	129200000	9228700	935830	525140	1174200	1260900	1440200	1663300	1638700	590510	0.383117	0.783241	0.408106	0.278572	K4D9Q9	K4D9Q9	K4D9Q9	'29.5'	'protein.degradation'	'(at2g27920 : 588.0) serine carboxypeptidase-like 51 (SCPL51); FUNCTIONS IN: serine-type carboxypeptidase activity; INVOLVED IN: proteolysis; LOCATED IN: mitochondrion; EXPRESSED IN: 22 plant structures; EXPRESSED DURING: 13 growth stages; CONTAINS InterPro DOMAIN/s: Peptidase S10, serine carboxypeptidase (InterPro:IPR001563), Peptidase S10, serine carboxypeptidase, active site (InterPro:IPR01820…	protein	Carboxypeptidase	Convencional Secreted (SignP)	Non-apoplastic	>tr|K4D9Q9|K4D9Q9_SOLLC Carboxypeptidase OS=Solanum lycopersicum PE=3 SV=1
5.5	6.12694	5.5	6.03117	6.10034	5.5	5.5	6.23459							397	1	2	2	6	53.092	499	0	7.9242	22559000	2050800	162690	385450	0	412380	349190	306960	101770	332340	0.0608616	1	0.0442052	0.0351589	K4D9R9	K4D9R9	K4D9R9	'29.5'	'protein.degradation'	'(at5g22850 : 641.0) Eukaryotic aspartyl protease family protein; FUNCTIONS IN: aspartic-type endopeptidase activity; INVOLVED IN: proteolysis; LOCATED IN: endomembrane system; EXPRESSED IN: 23 plant structures; EXPRESSED DURING: 13 growth stages; CONTAINS InterPro DOMAIN/s: Peptidase aspartic (InterPro:IPR021109), Peptidase aspartic, catalytic (InterPro:IPR009007), Peptidase A1 (InterPro:IPR0014…	protein	Aspartyl protease	Convencional Secreted (SignP)	Apoplastic	>tr|K4D9R9|K4D9R9_SOLLC Uncharacterized protein OS=Solanum lycopersicum PE=3 SV=1
5.5	6.24893	5.9468	6.35166	6.53908	5.9477	6.08686	5.5							398	1	3	3	16.3	42.559	380	0	31.253	41437000	2302000	0	410540	87094	550080	806810	215910	199310	32292	0.00767089	1	0.00656164	0.00509897	K4DA02	K4DA02	K4DA02	'26.4.1'	'misc.beta 1,3 glucan hydrolases.glucan endo-1,3-beta-glucosidase'	'(at2g27500 : 447.0) Glycosyl hydrolase superfamily protein; FUNCTIONS IN: cation binding, hydrolase activity, hydrolyzing O-glycosyl compounds, catalytic activity; INVOLVED IN: carbohydrate metabolic process; LOCATED IN: anchored to plasma membrane, nucleus, cytoplasm; EXPRESSED IN: 23 plant structures; EXPRESSED DURING: 13 growth stages; CONTAINS InterPro DOMAIN/s: Glycoside hydrolase, catalyti…	stress response	Glycosyl hydrolase	Convencional Secreted (SignP)	Apoplastic	>tr|K4DA02|K4DA02_SOLLC Uncharacterized protein OS=Solanum lycopersicum PE=3 SV=1
9.17719	9.16982	9.36979	9.32274	9.11701	9.19246	9.26479	9.4316							402	1	20	20	67.1	27.008	240	0	323.31	39717000000	2647800000	170300000	308030000	284230000	449230000	353120000	397050000	407030000	278780000	0.0344915	0.999933	-0.00841904	-0.00776488	K4DBB0	K4DBB0	K4DBB0	'30.2.99'	'signalling.receptor kinases.misc'	'(at3g22060 : 238.0) contains Pfam profile: PF01657 Domain of unknown function that is usually associated with protein kinase domain Pfam:PF00069, however this protein does not have the protein kinase domain; Receptor-like protein kinase-related family protein; FUNCTIONS IN: molecular_function unknown; INVOLVED IN: response to abscisic acid stimulus; LOCATED IN: cell wall, vacuole; EXPRESSED IN: …	signalling	Protein kinase	Convencional Secreted (SignP)	Non-apoplastic	>tr|K4DBB0|K4DBB0_SOLLC Uncharacterized protein OS=Solanum lycopersicum PE=4 SV=1
7.17225	7.56438	7.41128	7.34215	6.96321	7.32756	7.71048	7.03298							403	1	13	6	15.7	107.15	981	0	41.284	601460000	11567000	365330	2304100	1122500	1893700	870230	1586500	3277500	146660	0.245917	0.969289	-0.113957	-0.0958816	K4DBC4	K4DBC4	K4DBC4	'8.1.3'	'TCA / org transformation.TCA.aconitase'	'(p49608|acoc_cucma : 1695.0) Aconitate hydratase, cytoplasmic (EC 4.2.1.3) (Citrate hydro-lyase) (Aconitase) - Cucurbita maxima (Pumpkin) (Winter squash) & (at2g05710 : 1688.0) Encodes an aconitase that can catalyze the conversion of citrate to isocitrate through a cis-aconitate intermediate, indicating that it may participate in the TCA cycle and other primary metabolic pathways. The protein is…	metabolism	Aconitate hydratase	Non-Secreted	Non-apoplastic	>tr|K4DBC4|K4DBC4_SOLLC Aconitate hydratase OS=Solanum lycopersicum PE=3 SV=1
7.93475	7.66626	7.67582	7.65614	7.72989	7.72738	7.66776	8.03153							405	1	7	7	16.7	53.952	496	0	39.121	1466200000	77167000	4822200	6285900	4925000	11639000	19362000	11029000	11578000	7525700	0.209537	1	0.0559021	0.0505388	K4DBU6	K4DBU6	K4DBU6	'26.4.1'	'misc.beta 1,3 glucan hydrolases.glucan endo-1,3-beta-glucosidase'	(at5g56590 : 667.0) O-Glycosyl hydrolases family 17 protein; FUNCTIONS IN: cation binding, hydrolase activity, hydrolyzing O-glycosyl compounds, catalytic activity; INVOLVED IN: carbohydrate metabolic process; LOCATED IN: anchored to plasma membrane, plasma membrane, anchored to membrane, plant-type cell wall; EXPRESSED IN: 23 plant structures; EXPRESSED DURING: 13 growth stages; CONTAINS InterPr…	stress response	O-Glycosyl hydrolase	Convencional Secreted (SignP)	Apoplastic	>tr|K4DBU6|K4DBU6_SOLLC Uncharacterized protein OS=Solanum lycopersicum PE=3 SV=1
7.17719	6.93326	7.02922	7.50994	7.0839	7.06592	7.24684	6.7868							406	1	4	4	6.7	68.167	630	0	4.9093	378550000	17207000	647050	2054800	678430	5836200	3162200	2294500	1985900	547650	0.310415	0.980416	-0.116539	-0.100615	K4DBV2	K4DBV2	K4DBV2	'21.2.2'	'redox.ascorbate and glutathione.glutathione'	(at4g29210 : 737.0) The gene encodes a gamma-glutamyltransferase (AKA gamma-glutamyl transpeptidase, EC 2.3.2.2) that is located in the vacuole and is most active in roots. The encoded enzyme is involved in the initial degradation of glutathione conjugates in this cell compartment. It is also induced by xenobiotics and contributes to xenobiotics metabolism. Note that conflicting nomenclature exis…	redox	Gamma-glutamyltransferase	Leaderless Secreted	Non-apoplastic	>tr|K4DBV2|K4DBV2_SOLLC Uncharacterized protein OS=Solanum lycopersicum PE=4 SV=1
7.68701	7.3378	7.22565	7.44637	7.5536	7.34082	7.24405	7.54114							408	1	7	6	18.7	55.293	477	0	35.795	640600000	32030000	2142900	4282000	1379400	6304600	8634800	3760500	2501100	3025000	0.0116269	1	-0.00429988	-0.00382359	K4DC68	K4DC68	K4DC68	'26.13'	'misc.acid and other phosphatases'	'(at5g34850 : 716.0) Encodes a dual-targeted purple acid phosphatase isozyme AtPAP26. Involved in phosphate metabolism.; purple acid phosphatase 26 (PAP26); FUNCTIONS IN: protein serine/threonine phosphatase activity, acid phosphatase activity; INVOLVED IN: phosphate ion homeostasis; LOCATED IN: vacuole, plant-type cell wall; EXPRESSED IN: 25 plant structures; EXPRESSED DURING: 16 growth stages; …	metabolism	Purple acid phosphatase	Convencional Secreted (SignP)	Non-apoplastic	>tr|K4DC68|K4DC68_SOLLC Purple acid phosphatase OS=Solanum lycopersicum PE=3 SV=1
7.97904	8.16593	8.2772	8.25191	7.94731	8.18876	8.21948	8.43406							410	1	10	10	26.3	34.98	354	0	125.11	3931700000	302440000	9345500	43112000	31843000	61926000	28542000	53148000	36143000	38382000	0.0870819	1	0.0288838	0.0257812	K4DCS5	K4DCS5	K4DCS5	'26.19'	'misc.plastocyanin-like'	(at4g27520 : 140.0) early nodulin-like protein 2 (ENODL2); FUNCTIONS IN: electron carrier activity, copper ion binding; LOCATED IN: in 6 components; EXPRESSED IN: 24 plant structures; EXPRESSED DURING: 13 growth stages; CONTAINS InterPro DOMAIN/s: Plastocyanin-like (InterPro:IPR003245), Cupredoxin (InterPro:IPR008972); BEST Arabidopsis thaliana protein match is: early nodulin-like protein 1 (TAIR…	redox	Plastocyanin-like/Cupredoxin	Convencional Secreted (SignP)	Apoplastic	>tr|K4DCS5|K4DCS5_SOLLC Uncharacterized protein OS=Solanum lycopersicum PE=4 SV=1
5.5	6.47346	6.84277	5.5	6.24893	5.5	6.41923	5.96351							411	1	5	2	17.3	35.654	342	0	1.507	56360000	3315300	20940	1100100	505030	187590	406150	427890	628250	39335	0.0403224	1	-0.0461407	-0.0330214	K4DCV3	K4DCV3	K4CGU8	'8.1.9'	'TCA / org transformation.TCA.malate DH'	'(at1g53240 : 541.0) Lactate/malate dehydrogenase family protein; FUNCTIONS IN: malate dehydrogenase activity, copper ion binding; INVOLVED IN: response to cadmium ion, response to salt stress, response to cold, defense response to bacterium, peptidyl-cysteine S-nitrosylation; LOCATED IN: mitochondrion, cell wall, chloroplast; EXPRESSED IN: 26 plant structures; EXPRESSED DURING: 15 growth stages;…	metabolism	Malate dehydrogenase	Leaderless Secreted	Non-apoplastic	>tr|K4DCV3|K4DCV3_SOLLC Malate dehydrogenase OS=Solanum lycopersicum PE=3 SV=1
9.02115	9.09388	9.10151	9.00779	8.99667	8.99737	9.04618	9.38417							414	1	18	18	47.5	51.456	480	0	273.3	28093000000	1123700000	53527000	185490000	88248000	183460000	185470000	159330000	128710000	139500000	0.205653	1	0.0500185	0.0456164	K4DCX7	K4DCX7	K4DCX7	'26.4'	'misc.beta 1,3 glucan hydrolases'	'(at5g55180 : 591.0) O-Glycosyl hydrolases family 17 protein; FUNCTIONS IN: cation binding, hydrolase activity, hydrolyzing O-glycosyl compounds, catalytic activity; INVOLVED IN: carbohydrate metabolic process; LOCATED IN: endomembrane system; EXPRESSED IN: 18 plant structures; EXPRESSED DURING: 11 growth stages; CONTAINS InterPro DOMAIN/s: X8 (InterPro:IPR012946), Glycoside hydrolase, catalytic …	stress response	Glucan endo-1,3-beta-glucosidase	Convencional Secreted (SignP)	Apoplastic	>tr|K4DCX7|K4DCX7_SOLLC Uncharacterized protein OS=Solanum lycopersicum PE=3 SV=1
6.4208	6.74781	6.79154	6.87323	6.80208	6.74539	6.72032	6.80042							415	1	3	3	10	35.687	320	0	3.658	127390000	9099600	395340	1088500	1121400	1879700	1197400	1112000	1808100	497140	0.233878	1	0.0587085	0.0533044	K4DCX9	K4DCX9	K4DCX9	'35.1'	'not assigned.no ontology'	'(at5g57700 : 508.0) BNR/Asp-box repeat family protein; INVOLVED IN: biological_process unknown; LOCATED IN: cellular_component unknown; EXPRESSED IN: 23 plant structures; EXPRESSED DURING: 13 growth stages; CONTAINS InterPro DOMAIN/s: Neuraminidase (InterPro:IPR011040), BNR repeat (InterPro:IPR002860); Has 762 Blast hits to 754 proteins in 300 species: Archae - 6; Bacteria - 615; Metazoa - 0; Fu…	not assigned	Unknown protein	Non-Secreted	Non-apoplastic	>tr|K4DCX9|K4DCX9_SOLLC Uncharacterized protein OS=Solanum lycopersicum PE=4 SV=1
6.67571	6.56908	6.66349	7.11197	6.53008	7.20436	6.71035	7.61905							416	1	3	3	19.9	28.076	267	0	17.851	262990000	21916000	593200	1831700	901100	6825300	1263600	4286800	1927300	4287200	0.421523	0.830021	0.260899	0.20468	K4DD05	K4DD05	K4DD05	'10.5.1.1'	'cell wall.cell wall proteins.AGPs.AGP'	'(at4g12730 : 142.0) AF333971 Arabidopsis thaliana fasciclin-like arabinogalactan-protein 2 (Fla2) mRNA, complete cds; FASCICLIN-like arabinogalactan 2 (FLA2); INVOLVED IN: response to cyclopentenone; LOCATED IN: anchored to plasma membrane, plasma membrane, anchored to membrane, membrane; EXPRESSED IN: 25 plant structures; EXPRESSED DURING: 13 growth stages; CONTAINS InterPro DOMAIN/s: FAS1 doma…	cell wall	FASCICLIN-like arabinogalactan protein	Convencional Secreted (SignP)	Apoplastic	>tr|K4DD05|K4DD05_SOLLC Uncharacterized protein OS=Solanum lycopersicum PE=4 SV=1
8.39978	7.61755	7.06322	7.58054	7.83487	7.26677	7.09687	7.57669							417	1	12	12	35.2	40.857	369	0	141.68	954570000	50240000	15450000	5245400	790810	6699500	15023000	2729500	1588100	2713800	0.28772	0.871008	-0.22147	-0.167699	K4DD79	K4DD79	K4DD79	'11.9.2'	'lipid metabolism.lipid degradation.lipases'	'(at1g28590 : 293.0) GDSL-like Lipase/Acylhydrolase superfamily protein; FUNCTIONS IN: hydrolase activity, acting on ester bonds, carboxylesterase activity; INVOLVED IN: lipid metabolic process; LOCATED IN: endomembrane system; CONTAINS InterPro DOMAIN/s: Lipase, GDSL (InterPro:IPR001087); BEST Arabidopsis thaliana protein match is: GDSL-like Lipase/Acylhydrolase superfamily protein (TAIR:AT2G273…	metabolism	GDSL-like Lipase/Acylhydrolase	Convencional Secreted (SignP)	Apoplastic	>tr|K4DD79|K4DD79_SOLLC Uncharacterized protein OS=Solanum lycopersicum PE=4 SV=1
6.82574	6.67098	6.74252	6.67822	6.6508	6.60387	6.76021	6.98901							418	1	4	4	14.7	52.351	475	0	18.274	122300000	10192000	459910	1166100	971250	2125100	1429400	1427100	1315000	1298100	0.0840309	1	0.0216094	0.0197698	K4DDL2	K4DDL2	K4DDL2	'26.4.1'	'misc.beta 1,3 glucan hydrolases.glucan endo-1,3-beta-glucosidase'	'(at2g19440 : 688.0) O-Glycosyl hydrolases family 17 protein; FUNCTIONS IN: cation binding, hydrolase activity, hydrolyzing O-glycosyl compounds, catalytic activity; INVOLVED IN: carbohydrate metabolic process; LOCATED IN: plasma membrane, anchored to membrane; EXPRESSED IN: male gametophyte, pollen tube; EXPRESSED DURING: M germinated pollen stage; CONTAINS InterPro DOMAIN/s: X8 (InterPro:IPR012…	stress response	Glucan endo-1,3-beta-glucosidase	Convencional Secreted (SignP)	Apoplastic	>tr|K4DDL2|K4DDL2_SOLLC Uncharacterized protein OS=Solanum lycopersicum PE=3 SV=1
5.5	6.47044	6.80083	5.5	5.5	5.5	5.5	5.5							423	1	2	2	10.1	24.987	227	0.0089286	0.82583	69734000	8716700	0	1146300	1505500	1783500	532560	1307000	2348100	93722	0.851666	0.8206	-0.567817	-0.425428	K4DFX0	K4DFX0	K4DFX0	'20.2'	'stress.abiotic'	(p13046|prr1_tobac : 382.0) Pathogenesis-related protein R major form precursor (Thaumatin-like protein E22) - Nicotiana tabacum (Common tobacco) & (at4g11650 : 315.0) osmotin-like protein; osmotin 34 (OSM34); INVOLVED IN: defense response to fungus, incompatible interaction, response to salt stress, defense response to bacterium, incompatible interaction, response to other organism; LOCATED IN: …	stress response	Thaumatin-like protein	Convencional Secreted (SignP)	Apoplastic	>tr|K4DFX0|K4DFX0_SOLLC Uncharacterized protein OS=Solanum lycopersicum PE=4 SV=1
9.27298	9.22994	9.25696	9.32864	9.34134	9.1637	9.12077	9.38231							424	1	29	29	57.9	58.302	516	0	323.31	42659000000	1422000000	111310000	215070000	128610000	288750000	249180000	178320000	132960000	117790000	0.109639	1	-0.020102	-0.0188254	K4DG27	K4DG27	K4DG27	'35.2'	'not assigned.unknown'	' (original description: Uncharacterized protein OS=Solanum lycopersicum PE=3 SV=1)'	not assigned	Unknown protein	Convencional Secreted (SignP)	Apoplastic	>tr|K4DG27|K4DG27_SOLLC Uncharacterized protein OS=Solanum lycopersicum PE=3 SV=1
8.9349	8.99681	9.03129	9.09597	9.09318	9.01999	9.03806	9.48097							425	2	23	22	37	80.991	749	0	267.64	31749000000	1094800000	56494000	147520000	93536000	181860000	194470000	152040000	126300000	142590000	0.593734	0.895373	0.143308	0.128661	K4DGU7;K4DGU9	K4DGU7	K4DGU7	'29.5.1'	'protein.degradation.subtilases'	'(at5g67090 : 623.0) Subtilisin-like serine endopeptidase family protein; FUNCTIONS IN: identical protein binding, serine-type endopeptidase activity; INVOLVED IN: proteolysis, negative regulation of catalytic activity; LOCATED IN: endomembrane system; EXPRESSED IN: 9 plant structures; EXPRESSED DURING: 4 anthesis, petal differentiation and expansion stage, D bilateral stage; CONTAINS InterPro DO…	protein	Subtilase	Convencional Secreted (SignP)	Apoplastic	>tr|K4DGU7|K4DGU7_SOLLC Uncharacterized protein OS=Solanum lycopersicum PE=4 SV=1
5.63327	5.93333	5.5	5.98578	5.93898	5.79371	5.91807	5.7498							427	2	2	2	6.1	56.505	492	0	10.277	18874000	699040	17224	129520	21590	195290	158570	63329	92588	20918	0.287863	0.98798	0.0870428	0.0773051	P30264;K4DH34	P30264;K4DH34	P30264	'21.6'	'redox.dismutases and catalases'	'(p55312|cata2_soltu : 1023.0) Catalase isozyme 2 (EC 1.11.1.6) - Solanum tuberosum (Potato) & (at4g35090 : 816.0) Encodes a peroxisomal catalase, highly expressed in bolts and leaves. mRNA expression patterns show circadian regulation with mRNA levels being high in the subjective early morning. Loss of function mutations have increased H2O2 levels and increased H2O2 sensitivity. Mutants accumula…	redox	Catalase isozyme 1	Non-Secreted	Non-apoplastic	>sp|P30264|CATA1_SOLLC Catalase isozyme 1 OS=Solanum lycopersicum GN=CAT1 PE=2 SV=1;>tr|K4DH34|K4DH34_SOLLC Catalase OS=Solanum lycopersicum PE=3 SV=1
7.89161	7.23897	6.63499	7.36773	7.33096	6.96213	7.22843	7.39545							428	1	3	3	14.8	37.186	331	0	11.502	445010000	31786000	5801000	4167200	881350	5347800	5926200	3234200	3352600	3076000	0.0702346	1	-0.054085	-0.0424133	K4DH42	K4DH42	K4DH42	'29.5.3'	'protein.degradation.cysteine protease'	'(at4g35350 : 519.0) tracheary element vacuolar protein; xylem cysteine peptidase 1 (XCP1); FUNCTIONS IN: cysteine-type peptidase activity, cysteine-type endopeptidase activity; INVOLVED IN: proteolysis, developmental programmed cell death; LOCATED IN: plant-type vacuole; EXPRESSED IN: 20 plant structures; EXPRESSED DURING: 10 growth stages; CONTAINS InterPro DOMAIN/s: Peptidase C1A, papain (Inte…	protein	Cysteine protease	Non-Secreted	Non-apoplastic	>tr|K4DH42|K4DH42_SOLLC Uncharacterized protein OS=Solanum lycopersicum PE=3 SV=1
7.0035	7.0582	7.24035	7.32504	6.85224	6.97516	7.06882	7.03846							429	1	3	3	14	38.038	343	0	33.1	295780000	14789000	643520	1978000	1474600	4928100	1454800	1868600	1701400	740030	0.994652	0.896416	-0.173105	-0.158886	K4DHE9	K4DHE9	K4DHE9	'26.7'	'misc.oxidases - copper, flavone etc'	(at5g16970 : 508.0) encodes a 2-alkenal reductase (EC 1.3.1.74), plays a key role in the detoxification of reactive carbonyls; alkenal reductase (AER); FUNCTIONS IN: 2-alkenal reductase activity; INVOLVED IN: response to oxidative stress, response to cadmium ion, response to cyclopentenone; LOCATED IN: cytosol, nucleus; EXPRESSED IN: 17 plant structures; EXPRESSED DURING: 11 growth stages; CONTAI…	redox	2-alkenal reductase	Non-Secreted	Non-apoplastic	>tr|K4DHE9|K4DHE9_SOLLC Uncharacterized protein OS=Solanum lycopersicum PE=4 SV=1
6.57066	6.91182	6.92256	6.87185	6.77672	6.88375	6.71295	7.01803							430	1	4	4	10.9	54.524	479	0	28.151	160290000	7285800	168170	763120	718960	1789900	546600	1543300	896860	858830	0.0980806	1	0.0286433	0.0258753	K4DHT7	K4DHT7	K4DHT7	'29.5.5'	'protein.degradation.serine protease'	'(at3g17180 : 554.0) serine carboxypeptidase-like 33 (scpl33); FUNCTIONS IN: serine-type carboxypeptidase activity; INVOLVED IN: proteolysis; LOCATED IN: endomembrane system; EXPRESSED IN: shoot apex, root, flower, stamen; EXPRESSED DURING: 4 anthesis, petal differentiation and expansion stage; CONTAINS InterPro DOMAIN/s: Peptidase S10, serine carboxypeptidase (InterPro:IPR001563), Peptidase S10,…	protein	Serine carboxypeptidase	Convencional Secreted (SignP)	Apoplastic	>tr|K4DHT7|K4DHT7_SOLLC Carboxypeptidase OS=Solanum lycopersicum PE=3 SV=1
7.65523	8.17319	8.26209	7.71649	7.48717	8.16143	8.13171	6.57747							432	2	16	16	25.3	96.225	865	0	135.87	2273500000	52873000	932270	14193000	8187700	5367700	3239800	10281000	10551000	121220	0.39495	0.824	-0.362306	-0.258323	K4DI33;K4D8Y2	K4DI33	K4DI33	'35.2'	'not assigned.unknown'	'(at5g12950 : 1169.0) FUNCTIONS IN: catalytic activity; LOCATED IN: vacuole, plant-type cell wall; EXPRESSED IN: stem, male gametophyte, guard cell, pollen tube; EXPRESSED DURING: L mature pollen stage, M germinated pollen stage; CONTAINS InterPro DOMAIN/s: Protein of unknown function DUF1680 (InterPro:IPR012878), Six-hairpin glycosidase-like (InterPro:IPR008928); BEST Arabidopsis thaliana protei…	not assigned	Unknown protein	Convencional Secreted (SignP)	Non-apoplastic	>tr|K4DI33|K4DI33_SOLLC Uncharacterized protein OS=Solanum lycopersicum PE=4 SV=1
7.71012	8.46758	8.53884	8.61589	8.77632	9.01389	9.1261	8.90526							433	1	25	11	47.8	78.93	745	0	270.35	15837000000	479910000	2060700	37052000	21251000	57981000	80715000	116730000	125110000	39013000	1.50242	1	0.622286	0.508906	O04678	O04678	O04678	'29.5.1'	'protein.degradation.subtilases'	'(at1g04110 : 515.0) Initially identified as a mutation affecting stomatal development and distribution. Encodes a protein similar to serine proteases.; STOMATAL DENSITY AND DISTRIBUTION (SDD1); CONTAINS InterPro DOMAIN/s: Protease-associated PA (InterPro:IPR003137), Proteinase inhibitor, propeptide (InterPro:IPR009020), Peptidase S8/S53, subtilisin/kexin/sedolisin (InterPro:IPR000209), Peptidase…	protein	P69B	Convencional Secreted (SignP)	Apoplastic	>tr|O04678|O04678_SOLLC P69B protein OS=Solanum lycopersicum GN=P69B PE=2 SV=1
8.0923	7.7998	8.06224	8.1088	7.90469	8.03985	8.09854	8.11859							434	2	7	7	16.3	51.141	466	0	86.501	2532200000	115100000	5828200	12527000	9532300	26079000	17701000	18033000	17019000	8380000	0.103998	1	0.0246317	0.0226563	O49877;P20721	O49877;P20721	O49877	'29.5.3'	'protein.degradation.cysteine protease'	'(at1g47128 : 569.0) cysteine proteinase precursor-like protein/ dehydration stress-responsive gene (RD21); responsive to dehydration 21 (RD21); FUNCTIONS IN: cysteine-type endopeptidase activity, cysteine-type peptidase activity; INVOLVED IN: response to water deprivation; LOCATED IN: apoplast, chloroplast, vacuole; EXPRESSED IN: 23 plant structures; EXPRESSED DURING: 13 growth stages; CONTAINS …	protein	CYP1	Convencional Secreted (SignP)	Non-apoplastic	>tr|O49877|O49877_SOLLC CYP1 OS=Solanum lycopersicum GN=C14 PE=2 SV=1;>sp|P20721|CYSPL_SOLLC Low-temperature-induced cysteine proteinase (Fragment) OS=Solanum lycopersicum PE=2 SV=1
8.52209	8.13561	7.91972	8.63248	8.30623	8.48309	8.30595	8.19324							437	2	4	4	36.5	17.52	159	0	52.423	6417500000	802190000	44719000	81603000	22457000	244570000	127290000	160870000	84759000	35914000	0.0385536	1	0.019652	0.0167015	P04284;Q04108	P04284;Q04108	P04284	'20.1'	'stress.biotic'	(p11670|prb1_tobac : 193.0) Basic form of pathogenesis-related protein 1 precursor (PRP 1) - Nicotiana tabacum (Common tobacco) & (at4g33720 : 180.0) CAP (Cysteine-rich secretory proteins, Antigen 5, and Pathogenesis-related 1 protein) superfamily protein; FUNCTIONS IN: molecular_function unknown; INVOLVED IN: biological_process unknown; LOCATED IN: endomembrane system, extracellular region; EXPR…	stress response	Pathogenesis-related leaf protein 6	Convencional Secreted (SignP)	Apoplastic	>sp|P04284|PR06_SOLLC Pathogenesis-related leaf protein 6 OS=Solanum lycopersicum GN=PR1B1 PE=1 SV=2;>sp|Q04108|PR04_SOLLC Pathogenesis-related leaf protein 4 OS=Solanum lycopersicum PE=2 SV=1
6.92375	6.88761	6.96689	6.98549	7.17998	6.92252	5.5	5.5							438	1	5	3	23.1	26.646	247	0	30.95	201970000	25246000	1638300	3645600	906140	6008800	9614300	2735600	616460	80546	0.719046	1	-0.665307	-0.458385	P12670	P12670	P12670	'20.2'	'stress.abiotic'	'(p14170|osmo_tobac : 439.0) Osmotin precursor - Nicotiana tabacum (Common tobacco) & (at4g11650 : 301.0) osmotin-like protein; osmotin 34 (OSM34); INVOLVED IN: defense response to fungus, incompatible interaction, response to salt stress, defense response to bacterium, incompatible interaction, response to other organism; LOCATED IN: endomembrane system; EXPRESSED IN: 6 plant structures; EXPRESS…	stress response	NP24	Convencional Secreted (SignP)	Apoplastic	>sp|P12670|NP24_SOLLC Protein NP24 OS=Solanum lycopersicum PE=1 SV=2
6.37856	6.41212	6.7852	6.6173	6.34092	6.49779	6.84326	6.32799							439	2	2	2	11.1	22.282	217	0	3.2639	91668000	13095000	311700	1657900	1548700	3957600	1089300	1669900	2389600	470720	0.110837	1	-0.0458074	-0.0397285	Q7XAV2;P14831	Q7XAV2;P14831	Q7XAV2	'21.6'	'redox.dismutases and catalases'	'(p10792|sodcp_pethy : 275.0) Superoxide dismutase [Cu-Zn], chloroplast precursor (EC 1.15.1.1) - Petunia hybrida (Petunia) & (at2g28190 : 240.0) Encodes a chloroplastic copper/zinc superoxide dismutase CSD2 that can detoxify superoxide radicals. Its expression is affected by miR398-directed mRNA cleavage.; copper/zinc superoxide dismutase 2 (CSD2); FUNCTIONS IN: superoxide dismutase activity; IN…	redox	Superoxide dismutase [Cu-Zn]	Leaderless Secreted	Apoplastic	>tr|Q7XAV2|Q7XAV2_SOLLC Superoxide dismutase [Cu-Zn] OS=Solanum lycopersicum PE=2 SV=1;>sp|P14831|SODCP_SOLLC Superoxide dismutase [Cu-Zn], chloroplastic OS=Solanum lycopersicum GN=SODCP.2 PE=1 SV=1
9.16976	9.05319	9.12434	9.13878	9.08782	9.11711	9.16823	9.34526							440	1	5	4	17.3	38.749	364	0	82.638	32199000000	2476800000	150240000	247580000	210330000	452480000	434270000	375460000	339720000	266730000	0.408808	1	0.0580842	0.0546563	P15003	P15003	P15003	'26.9'	misc.glutathione S transferases'	(p12437|perx_soltu : 595.0) Suberization-associated anionic peroxidase precursor (EC 1.11.1.7) (POPA) - Solanum tuberosum (Potato) & (gnl|cdd|29388 : 351.0) no description available & (at5g05340 : 210.0) Peroxidase superfamily protein; FUNCTIONS IN: protein binding, peroxidase activity; INVOLVED IN: response to oxidative stress, oxidation reduction; LOCATED IN: apoplast, cell wall; EXPRESSED IN: …	redox	Suberization-associated anionic peroxidase 1	Convencional Secreted (SignP)	Apoplastic	>sp|P15003|PER1_SOLLC Suberization-associated anionic peroxidase 1 OS=Solanum lycopersicum GN=TAP1 PE=3 SV=1
8.27035	7.68299	7.65315	7.70418	8.01866	8.11684	7.81726	8.14622							441	1	4	3	14	38.547	363	0	5.779	2233300000	203030000	7484400	27383000	9270700	24453000	35477000	46827000	27705000	24429000	0.554594	0.87	0.197075	0.169081	P15004	P15004	P15004	'26.12'	'misc.peroxidases'	'(p12437|perx_soltu : 531.0) Suberization-associated anionic peroxidase precursor (EC 1.11.1.7) (POPA) - Solanum tuberosum (Potato) & (gnl|cdd|29388 : 350.0) no description available & (at5g05340 : 205.0) Peroxidase superfamily protein; FUNCTIONS IN: protein binding, peroxidase activity; INVOLVED IN: response to oxidative stress, oxidation reduction; LOCATED IN: apoplast, cell wall; EXPRESSED IN:…	peroxidases	Suberization-associated anionic peroxidase 2	Convencional Secreted (SignP)	Apoplastic	>sp|P15004|PER2_SOLLC Suberization-associated anionic peroxidase 2 OS=Solanum lycopersicum GN=TAP2 PE=3 SV=1
5.5	6.76594	6.76338	7.63174	6.79456	7.28798	6.9681	6.71407							442	1	6	6	16.8	64.937	595	0	17.334	357370000	10829000	87912	957200	499320	5221300	730990	2257100	855090	220530	0.245585	0.823303	0.275913	0.189376	P25306	P25306	P25306	'13.1.4.5.1'	'amino acid metabolism.synthesis.branched chain group.isoleucine specific.threonine ammonia-lyase'	'(q39469|thd1_cicar : 735.0) Threonine dehydratase biosynthetic, chloroplast precursor (EC 4.3.1.19) (Threonine deaminase) (TD) - Cicer arietinum (Chickpea) (Garbanzo) & (gnl|cdd|82867 : 619.0) no description available & (at3g10050 : 527.0) first enzyme in the biosynthetic pathway of isoleucine; L-O-methylthreonine resistant 1 (OMR1); FUNCTIONS IN: L-threonine ammonia-lyase activity; INVOLVED IN:…	metabolism	Threonine dehydratase biosynthetic, chloroplastic	Non-Secreted	Non-apoplastic	>sp|P25306|THD1_SOLLC Threonine dehydratase biosynthetic, chloroplastic OS=Solanum lycopersicum GN=TD PE=1 SV=1
8.00273	7.79482	7.84382	7.99642	7.91437	7.65206	7.70105	7.38675							443	1	16	7	45.9	47.798	444	0	316.59	1589500000	69109000	6089300	13027000	4824900	16022000	14330000	7383800	6279800	1152400	1.05673	0.828424	-0.245891	-0.219411	P26300	P26300	P26300	'4.1.13'	'glycolysis.cytosolic branch.enolase'	'(at2g36530 : 799.0) Involved in light-dependent cold tolerance and encodes an enolase. Protein is tyrosine-phosphorylated and its phosphorylation state is modulated in response to ABA in Arabidopsis thaliana seeds.; LOW EXPRESSION OF OSMOTICALLY RESPONSIVE GENES 2 (LOS2); FUNCTIONS IN: phosphopyruvate hydratase activity, copper ion binding; INVOLVED IN: response to cadmium ion, response to salt …	metabolism	Enolase	Non-Secreted	Non-apoplastic	>sp|P26300|ENO_SOLLC Enolase OS=Solanum lycopersicum GN=PGH1 PE=2 SV=1
7.37361	7.6329	6.96655	7.34215	6.79314	6.99923	7.10934	5.5							444	2	7	7	15.5	52.954	477	0	6.6712	330540000	14371000	2170800	3485200	821240	3433000	855350	1604600	1886600	114450	0.93448	1	-0.728374	-0.521357	P27065;K4D005	P27065	P27065	'1.3.1'	'PS.calvin cycle.rubisco large subunit'	'(gnl|cdd|79258 : 979.0) no description available & (p00876|rbl_tobac : 972.0) Ribulose bisphosphate carboxylase large chain precursor (EC 4.1.1.39) (RuBisCO large subunit) - Nicotiana tabacum (Common tobacco) & (atcg00490 : 922.0) large subunit of RUBISCO. Protein is tyrosine-phosphorylated and its phosphorylation state is modulated in response to ABA in Arabidopsis thaliana seeds.; RBCL; FUNCTI…	others	Ribulose bisphosphate carboxylase large chain	Non-Secreted	Non-apoplastic	>sp|P27065|RBL_SOLLC Ribulose bisphosphate carboxylase large chain OS=Solanum lycopersicum GN=rbcL PE=1 SV=4
7.29675	7.05273	7.24603	7.50993	6.95319	7.4677	7.584	7.17618							445	1	3	3	30.1	16.026	143	0	62.111	515350000	64419000	3628900	6578300	7357500	14481000	5401300	15111000	9015800	2846200	0.0383478	0.997868	0.0189059	0.0161474	P32045	P32045	P32045	'20.1'	'stress.biotic'	'(p29063|pr4b_tobac : 233.0) Pathogenesis-related protein PR-4B precursor - Nicotiana tabacum (Common tobacco) & (gnl|cdd|64814 : 207.0) no description available & (at3g04720 : 186.0) Encodes a protein similar to the antifungal chitin-binding protein hevein from rubber tree latex. mRNA levels increase in response to ethylene and turnip crinkle virus infection.; pathogenesis-related 4 (PR4); FUNCT…	stress response	Pathogenesis-related protein P2	Convencional Secreted (SignP)	Apoplastic	>sp|P32045|PRP2_SOLLC Pathogenesis-related protein P2 OS=Solanum lycopersicum PE=2 SV=1
7.75254	7.53841	7.53745	7.46489	7.48756	7.36261	7.5317	7.25921							446	1	6	6	17.8	39.719	360	0	12.734	704690000	50335000	5426000	5022200	4536900	11948000	4441400	7310300	9067300	2583000	0.950082	0.916214	-0.163053	-0.149913	Q01413	Q01413	Q01413	'26.4.1'	'misc.beta 1,3 glucan hydrolases.glucan endo-1,3-beta-glucosidase'	'(p52401|e132_soltu : 641.0) Glucan endo-1,3-beta-glucosidase, basic isoform 2 precursor (EC 3.2.1.39) ((1->3)-beta-glucan endohydrolase) ((1->3)-beta-glucanase) (Beta-1,3-endoglucanase) - Solanum tuberosum (Potato) & (gnl|cdd|84700 : 455.0) no description available & (at4g16260 : 352.0) Glycosyl hydrolase superfamily protein; FUNCTIONS IN: cation binding, hydrolase activity, hydrolyzing O-glycos…	stress response	Glucan endo-1,3-beta-glucosidase B	Convencional Secreted (SignP)	Non-apoplastic	>sp|Q01413|E13B_SOLLC Glucan endo-1,3-beta-glucosidase B OS=Solanum lycopersicum PE=2 SV=1
7.48054	7.64185	7.74811	7.68725	7.47811	7.8104	7.83278	7.11998							447	3	10	4	43.2	34.345	322	0	25.496	1065100000	96832000	4837200	13689000	5212200	21566000	13058000	13393000	21259000	3816900	0.173353	0.989296	-0.0791223	-0.0672125	Q05538;K4D1G8;K4D1M8	Q05538	Q05538	'20.1'	'stress.biotic'	'(p52405|chi3_soltu : 523.0) Endochitinase 3 precursor (EC 3.2.1.14) (Fragment) - Solanum tuberosum (Potato) & (gnl|cdd|84590 : 407.0) no description available & (at3g12500 : 403.0) encodes a basic chitinase involved in ethylene/jasmonic acid mediated signalling pathway during systemic acquired resistance based on expression analyses.; basic chitinase (HCHIB); FUNCTIONS IN: chitinase activity; IN…	stress response	Basic 30 kDa endochitinase	Convencional Secreted (SignP)	Apoplastic	>sp|Q05538|CHIC_SOLLC Basic 30 kDa endochitinase OS=Solanum lycopersicum GN=CHI9 PE=1 SV=1
8.11621	8.22344	8.47098	8.45042	8.31175	8.3816	8.55172	8.24519							448	1	8	8	59.3	27.632	253	0	172.11	5577700000	507060000	23350000	35297000	61409000	106650000	63687000	108580000	79340000	28747000	0.208971	1	0.057303	0.0516691	Q05539	Q05539	Q05539	'20.1'	'stress.biotic'	'(p17514|chiq_tobac : 380.0) Acidic endochitinase Q precursor (EC 3.2.1.14) (Pathogenesis-related protein Q) (PR-Q) - Nicotiana tabacum (Common tobacco) & (gnl|cdd|84590 : 344.0) no description available & (at3g12500 : 266.0) encodes a basic chitinase involved in ethylene/jasmonic acid mediated signalling pathway during systemic acquired resistance based on expression analyses.; basic chitinase (…	stress response	Acidic 26 kDa endochitinase	Convencional Secreted (SignP)	Apoplastic	>sp|Q05539|CHIA_SOLLC Acidic 26 kDa endochitinase OS=Solanum lycopersicum GN=CHI3 PE=1 SV=1
7.56764	7.60822	7.70864	7.61329	7.25324	7.73367	7.83952	7.29012							449	1	6	6	24.3	26.583	247	0	42.572	1022100000	146010000	11011000	20971000	20163000	29259000	6531000	33234000	20283000	4556400	0.254083	0.994262	-0.0953077	-0.0826369	Q05540	Q05540	Q05540	'20.1'	'stress.biotic'	'(p29021|chit_pethy : 427.0) Acidic endochitinase precursor (EC 3.2.1.14) - Petunia hybrida (Petunia) & (gnl|cdd|84590 : 362.0) no description available & (at3g12500 : 308.0) encodes a basic chitinase involved in ethylene/jasmonic acid mediated signalling pathway during systemic acquired resistance based on expression analyses.; basic chitinase (HCHIB); FUNCTIONS IN: chitinase activity; INVOLVED …	stress response	Acidic 27 kDa endochitinase	Convencional Secreted (SignP)	Apoplastic	>sp|Q05540|CHIB_SOLLC Acidic 27 kDa endochitinase OS=Solanum lycopersicum GN=CHI17 PE=1 SV=1
6.3744	6.32719	5.5	6.26717	6.05599	5.5	5.5	5.5							451	1	2	2	3.2	58.151	524	0.0023529	0.9961	27520000	833930	94956	258220	37362	199050	107150	79504	49663	8025.7	0.985148	0.844769	-0.478194	-0.382784	Q15I66	Q15I66	Q15I66	'2.1.2.1'	'major CHO metabolism.synthesis.starch.AGPase'	(q00081|glgl1_soltu : 958.0) Glucose-1-phosphate adenylyltransferase large subunit 1 (EC 2.7.7.27) (ADP-glucose synthase) (ADP-glucose pyrophosphorylase) (AGPase S) (Alpha-D-glucose-1-phosphate adenyl transferase) (Fragment) - Solanum tuberosum (Potato) & (at4g39210 : 780.0) Encodes the large subunit of ADP-Glucose Pyrophosphorylase which catalyzes the first, rate limiting step in starch biosynth…	metabolism	Glucose-1-phosphate adenylyltransferase	Non-Secreted	Non-apoplastic	>tr|Q15I66|Q15I66_SOLLC Glucose-1-phosphate adenylyltransferase OS=Solanum lycopersicum GN=AgpL1 PE=3 SV=1
6.14903	6.24925	6.24207	6.32746	6.2119	6.28065	6.5367	5.88025							452	1	2	2	4.6	62.778	568	0	29.258	49403000	1543800	42477	261110	100620	459210	209580	230210	221570	19066	0.0359959	1	-0.01458	-0.0127893	Q1PCD2	Q1PCD2	Q1PCD2	'4.1.3'	'glycolysis.cytosolic branch.glucose-6-phosphate isomerase'	(at5g42740 : 971.0) Sugar isomerase (SIS) family protein; FUNCTIONS IN: glucose-6-phosphate isomerase activity; INVOLVED IN: defense response to fungus, incompatible interaction, response to cadmium ion, gluconeogenesis, glycolysis; LOCATED IN: cellular_component unknown; EXPRESSED IN: 24 plant structures; EXPRESSED DURING: 13 growth stages; CONTAINS InterPro DOMAIN/s: Phosphoglucose isomerase, c…	metabolism	Glucose-6-phosphate isomerase	Non-Secreted	Non-apoplastic	>tr|Q1PCD2|Q1PCD2_SOLLC Glucose-6-phosphate isomerase OS=Solanum lycopersicum GN=GPI PE=2 SV=1
8.419	8.13082	7.98664	8.32913	7.90096	8.07416	8.00766	8.24679							453	1	7	7	19.4	38.944	356	0	27.867	2922300000	171900000	16654000	23786000	12681000	38968000	13558000	21719000	22808000	21726000	0.622835	0.907453	-0.159003	-0.141785	Q40143	Q40143	Q40143	'29.5.3'	'protein.degradation.cysteine protease'	'(at3g45310 : 495.0) Cysteine proteinases superfamily protein; FUNCTIONS IN: cysteine-type endopeptidase activity, cysteine-type peptidase activity; INVOLVED IN: proteolysis; LOCATED IN: endomembrane system; EXPRESSED IN: 22 plant structures; EXPRESSED DURING: 13 growth stages; CONTAINS InterPro DOMAIN/s: Peptidase C1A, papain (InterPro:IPR013128), Proteinase inhibitor I29, cathepsin propeptide (…	protein	Cysteine proteinase 3	Convencional Secreted (SignP)	Non-apoplastic	>sp|Q40143|CYSP3_SOLLC Cysteine proteinase 3 OS=Solanum lycopersicum GN=CYP-3 PE=2 SV=1
6.6679	5.5	6.1233	5.5	5.5	5.5	5.5	6.21619							454	1	2	1	10.1	34.01	296	0	1.6361	30540000	2181400	314180	302780	174920	373470	315510	403420	106430	190690	0.345683	0.80736	-0.268751	-0.20153	Q40144	Q40144	Q40144	'10.7'	'cell wall.modification'	'(p93349|xth_tobac : 580.0) Probable xyloglucan endotransglucosylase/hydrolase protein precursor (EC 2.4.1.207) - Nicotiana tabacum (Common tobacco) & (at5g13870 : 452.0) EXGT-A4, endoxyloglucan transferase,; xyloglucan endotransglucosylase/hydrolase 5 (XTH5); FUNCTIONS IN: hydrolase activity, acting on glycosyl bonds, hydrolase activity, hydrolyzing O-glycosyl compounds, xyloglucan:xyloglucosyl …	cell wall	Xyloglucan endotransglucosylase/hydrolase 1	Convencional Secreted (SignP)	Apoplastic	>sp|Q40144|XTH1_SOLLC Probable xyloglucan endotransglucosylase/hydrolase 1 OS=Solanum lycopersicum GN=XTH1 PE=2 SV=1
6.46595	6.51747	6.47921	5.5	6.35589	5.5	6.55951	6.22357							455	1	3	3	7.6	55.277	501	0.0023474	0.99265	52848000	2402200	126920	769780	248350	255510	332720	144230	382710	141970	0.0868536	0.996473	-0.0809147	-0.0604768	Q42871	Q42871	Q42871	'10.6.1'	'cell wall.degradation.cellulases and beta -1,4-glucanases'	'(p22503|gun_phavu : 639.0) Endoglucanase precursor (EC 3.2.1.4) (Endo-1,4-beta-glucanase) (Abscission cellulase) - Phaseolus vulgaris (Kidney bean) (French bean) & (at4g09740 : 606.0) glycosyl hydrolase 9B14 (GH9B14); FUNCTIONS IN: hydrolase activity, hydrolyzing O-glycosyl compounds, catalytic activity; INVOLVED IN: carbohydrate metabolic process; LOCATED IN: endomembrane system; CONTAINS Inter…	cell wall	Endoglucanase	Convencional Secreted (SignP)	Apoplastic	>tr|Q42871|Q42871_SOLLC Endoglucanase OS=Solanum lycopersicum GN=Cel1 PE=2 SV=1
7.40343	7.61588	7.51527	7.67778	7.48629	7.7235	7.51178	7.14607							456	2	9	9	36	34.763	328	0	82.094	827650000	45980000	2243400	8420900	3994400	7487100	7825600	8104500	6523300	1381300	0.265185	0.97798	-0.0861806	-0.0760176	Q42896;K4BCU7	Q42896	Q42896	'2.2.1.1'	'major CHO metabolism.degradation.sucrose.fructokinase'	'(p37829|scrk_soltu : 578.0) Fructokinase (EC 2.7.1.4) - Solanum tuberosum (Potato) & (at1g06020 : 544.0) pfkB-like carbohydrate kinase family protein; FUNCTIONS IN: kinase activity, ribokinase activity; INVOLVED IN: D-ribose metabolic process, acetate fermentation, sucrose biosynthetic process, sucrose catabolic process, using beta-fructofuranosidase; EXPRESSED IN: central cell, embryo; EXPRESSE…	metabolism	Fructokinase-2	Non-Secreted	Non-apoplastic	>sp|Q42896|SCRK2_SOLLC Fructokinase-2 OS=Solanum lycopersicum GN=FRK2 PE=2 SV=2
5.5	7.75325	7.81482	7.36367	6.90294	7.34762	7.59047	5.5							459	2	6	6	24.9	27.91	249	0	38.96	676790000	61526000	490900	18660000	10486000	9600500	2873400	7382400	11999000	34094	0.144348	0.890698	-0.272673	-0.15871	Q7YK44;K4C589	Q7YK44	Q7YK44	'21.6'	'redox.dismutases and catalases'	(p22302|sodf_nicpl : 365.0) Superoxide dismutase [Fe], chloroplast (EC 1.15.1.1) (Fragment) - Nicotiana plumbaginifolia (Leadwort-leaved tobacco) & (at5g51100 : 291.0) Fe superoxide dismutase whose mRNA levels are increased in response to exposure to UV-B.; Fe superoxide dismutase 2 (FSD2); FUNCTIONS IN: superoxide dismutase activity; INVOLVED IN: response to UV; LOCATED IN: chloroplast, nucleoid…	redox	Superoxide dismutase	Non-Secreted	Non-apoplastic	>tr|Q7YK44|Q7YK44_SOLLC Superoxide dismutase OS=Solanum lycopersicum GN=sodb PE=2 SV=1
6.95868	6.55406	6.96998	6.69614	6.61076	6.6122	6.78507	6.51456							460	2	4	4	8.2	52.81	500	0	3.6712	114970000	4106100	310590	588410	628760	470770	779310	329160	813050	186080	0.679442	0.906933	-0.16407	-0.146931	Q8GT30;K4DHT1	Q8GT30;K4DHT1	K4DHT1	'8.1.1.3'	'TCA / org transformation.TCA.pyruvate DH.E3'	'(at1g48030 : 798.0) Encodes a mitochondrial lipoamide dehydrogenase whose expression is induced by light.; lipoamide dehydrogenase 1 (LPD1); FUNCTIONS IN: dihydrolipoyl dehydrogenase activity, copper ion binding, cobalt ion binding, zinc ion binding, ATP binding; INVOLVED IN: response to cadmium ion, response to light stimulus; LOCATED IN: mitochondrion, apoplast, mitochondrial respiratory chain…	metabolism	Dihydrolipoyl dehydrogenase	Non-Secreted	Non-apoplastic	>tr|Q8GT30|Q8GT30_SOLLC Dihydrolipoyl dehydrogenase OS=Solanum lycopersicum PE=2 SV=1;>tr|K4DHT1|K4DHT1_SOLLC Dihydrolipoyl dehydrogenase OS=Solanum lycopersicum PE=4 SV=1
7.60293	8.09065	8.15497	8.18732	7.82025	8.09395	8.29912	7.76323							461	2	21	20	46.8	60.28	577	0	140.84	2908000000	88122000	1691200	15728000	6331000	17459000	8936800	14191000	21507000	2278200	0.0274518	0.995061	-0.0148314	-0.0125148	Q8GZD8;Q42876	Q8GZD8;Q42876	Q8GZD8	'29.5'	'protein.degradation'	'(p31427|ampl_soltu : 744.0) Leucine aminopeptidase, chloroplast precursor (EC 3.4.11.1) (LAP) (Leucyl aminopeptidase) (Proline aminopeptidase) (EC 3.4.11.5) (Prolyl aminopeptidase) - Solanum tuberosum (Potato) & (at4g30920 : 720.0) Cytosol aminopeptidase family protein; FUNCTIONS IN: manganese ion binding, metalloexopeptidase activity, aminopeptidase activity; INVOLVED IN: proteolysis, protein m…	protein	Neutral leucine aminopeptidase preprotein	Non-Secreted	Non-apoplastic	>tr|Q8GZD8|Q8GZD8_SOLLC Neutral leucine aminopeptidase preprotein OS=Solanum lycopersicum GN=LapN PE=2 SV=1;>sp|Q42876|AMPL2_SOLLC Leucine aminopeptidase 2, chloroplastic OS=Solanum lycopersicum GN=LAPA2 PE=2 SV=1
7.01645	5.5	5.5	6.64293	8.5429	8.74635	8.43669	7.79937					+	Fol007_Mock	462	1	6	3	38.9	24.59	226	0	78.591	4874800000	609350000	11518000	29127000	922900	2104700	350750000	98710000	111220000	4994500	2.61927	0	2.21648	1.53764	Q8LPU1	Q8LPU1	Q8LPU1	'20.2'	'stress.abiotic'	'(p14170|osmo_tobac : 413.0) Osmotin precursor - Nicotiana tabacum (Common tobacco) & (at4g11650 : 302.0) osmotin-like protein; osmotin 34 (OSM34); INVOLVED IN: defense response to fungus, incompatible interaction, response to salt stress, defense response to bacterium, incompatible interaction, response to other organism; LOCATED IN: endomembrane system; EXPRESSED IN: 6 plant structures; EXPRESS…	stress response	PR-5x	Convencional Secreted (SignP)	Apoplastic	>tr|Q8LPU1|Q8LPU1_SOLLC PR-5x OS=Solanum lycopersicum GN=PR-5 PE=2 SV=1
7.73074	7.45318	7.74764	7.47774	7.73667	8.24834	8.44762	8.09757							463	1	4	4	12.8	38.518	345	0	21.022	2199900000	137500000	4298900	7501000	13840000	9760100	18545000	34746000	37152000	11652000	1.68788	0.992571	0.530225	0.45326	Q8S333	Q8S333	Q8S333	'29.5.3'	'protein.degradation.cysteine protease'	'(at2g34080 : 321.0) Cysteine proteinases superfamily protein; FUNCTIONS IN: cysteine-type peptidase activity, cysteine-type endopeptidase activity; INVOLVED IN: proteolysis; LOCATED IN: endomembrane system; CONTAINS InterPro DOMAIN/s: Peptidase C1A, papain (InterPro:IPR013128), Proteinase inhibitor I29, cathepsin propeptide (InterPro:IPR013201), Peptidase C1A, papain C-terminal (InterPro:IPR0006…	protein	Cysteine protease	Convencional Secreted (SignP)	Non-apoplastic	>tr|Q8S333|Q8S333_SOLLC Cysteine protease OS=Solanum lycopersicum GN=Rcr3 PE=3 SV=1
8.8441	9.00928	9.00873	9.15894	9.01853	8.95301	8.87153	8.8852							464	4	34	34	45.4	74.231	674	0	245.41	27192000000	1045900000	33666000	150420000	97321000	242260000	197600000	156660000	112380000	55557000	0.452461	0.989623	-0.0731909	-0.0682317	Q944F3;K4D250;REV__K4CRS1;REV__K4B979	Q944F3	Q944F3	'10.6.2'	'cell wall.degradation.mannan-xylose-arabinose-fucose'	'(at3g10740 : 893.0) Encodes a bifunctional alpha-l-arabinofuranosidase/beta-d-xylosidase that belongs to family 51 of glycoside hydrolases. It may be involved in cell wall modification.; alpha-L-arabinofuranosidase 1 (ASD1); FUNCTIONS IN: hydrolase activity, acting on glycosyl bonds, xylan 1,4-beta-xylosidase activity, alpha-N-arabinofuranosidase activity; INVOLVED IN: xylan catabolic process; L…	cell wall	Arabinosidase ARA-1	Convencional Secreted (SignP)	Non-apoplastic	>tr|Q944F3|Q944F3_SOLLC Arabinosidase ARA-1 OS=Solanum lycopersicum PE=2 SV=1
6.78246	6.96066	6.66778	6.91662	5.5	6.83401	6.59326	6.71562							465	1	4	4	19.3	31.586	275	0	27.027	133980000	10306000	677320	2816000	607290	2715700	316130	1755800	1064300	353750	0.639753	0.791535	-0.421154	-0.320356	Q9FZ05	Q9FZ05	Q9FZ05	'10.6.2'	'cell wall.degradation.mannan-xylose-arabinose-fucose'	'(at5g57550 : 368.0) xyloglucan endotransglycosylase-related protein (XTR3); xyloglucan endotransglucosylase/hydrolase 25 (XTH25); FUNCTIONS IN: hydrolase activity, acting on glycosyl bonds, xyloglucan:xyloglucosyl transferase activity; INVOLVED IN: plant-type cell wall biogenesis; LOCATED IN: endomembrane system, cell wall, apoplast; EXPRESSED IN: 9 plant structures; EXPRESSED DURING: 8 growth s…	cell wall	Xyloglucan endotransglucosylase/hydrolase	Convencional Secreted (SignP)	Apoplastic	>tr|Q9FZ05|Q9FZ05_SOLLC Xyloglucan endotransglucosylase/hydrolase OS=Solanum lycopersicum GN=LeXET2 PE=2 SV=1
5.5	5.5	6.71052	6.82314	6.66168	6.80449	6.84133	6.99098							467	3	6	1	9.1	84.914	777	0	6.7583	92423000	2567300	196760	53033	115970	75638	423470	340520	289790	1072100	0.946911	1	0.691205	0.503568	Q9ZS44;K4AYH4;K4AYH0	Q9ZS44;K4AYH4;K4AYH0	Q9ZS44	'29.5.1'	'protein.degradation.subtilases'	(at5g67090 : 497.0) Subtilisin-like serine endopeptidase family protein; FUNCTIONS IN: identical protein binding, serine-type endopeptidase activity; INVOLVED IN: proteolysis, negative regulation of catalytic activity; LOCATED IN: endomembrane system; EXPRESSED IN: 9 plant structures; EXPRESSED DURING: 4 anthesis, petal differentiation and expansion stage, D bilateral stage; CONTAINS InterPro DOM…	protein	SBT4B	Convencional Secreted (SignP)	Non-apoplastic	>tr|Q9ZS44|Q9ZS44_SOLLC SBT4B protein OS=Solanum lycopersicum GN=sbt4b PE=4 SV=1;>tr|K4AYH4|K4AYH4_SOLLC Uncharacterized protein OS=Solanum lycopersicum PE=4 SV=1;>tr|K4AYH0|K4AYH0_SOLLC Uncharacterized protein OS=Solanum lycopersicum PE=4 SV=1

## Sheet: proteinGroups_filtered
id	Protein IDs	Majority protein IDs	Peptide counts all	Peptide counts razor unique	Peptide counts unique	Fasta headers	Number of proteins	Peptides	Razor unique peptides	Unique peptides	Peptides FR36_Mock_i2S1	Peptides FR37_Mock_i2S2	Peptides FR38_Mock_i2S3	Peptides FR39_Mock_i2S4	Peptides FR40_Fol007_i2S1	Peptides FR41_Fol007_i2S2	Peptides FR42_Fol007_i2S3	Peptides FR43_Fol007_i2S4	Razor unique peptides FR36_Mock_i2S1	Razor unique peptides FR37_Mock_i2S2	Razor unique peptides FR38_Mock_i2S3	Razor unique peptides FR39_Mock_i2S4	Razor unique peptides FR40_Fol007_i2S1	Razor unique peptides FR41_Fol007_i2S2	Razor unique peptides FR42_Fol007_i2S3	Razor unique peptides FR43_Fol007_i2S4	Unique peptides FR36_Mock_i2S1	Unique peptides FR37_Mock_i2S2	Unique peptides FR38_Mock_i2S3	Unique peptides FR39_Mock_i2S4	Unique peptides FR40_Fol007_i2S1	Unique peptides FR41_Fol007_i2S2	Unique peptides FR42_Fol007_i2S3	Unique peptides FR43_Fol007_i2S4	Sequence coverage	Unique razor sequence coverage	Unique sequence coverage	Mol weight kDa	Sequence length	Sequence lengths	Q value	Score	Identification type FR36_Mock_i2S1	Identification type FR37_Mock_i2S2	Identification type FR38_Mock_i2S3	Identification type FR39_Mock_i2S4	Identification type FR40_Fol007_i2S1	Identification type FR41_Fol007_i2S2	Identification type FR42_Fol007_i2S3
#!{Type}N	T	T				T	N	N		N																									N			N	N		N	N
0	A7X331	A7X331	9	9	9	>tr|A7X331|A7X331_SOLLC Expansin-like protein OS=Solanum lycopersicum GN=EXLA1 PE=2 SV=1	1	9	9	9	8	9	8	8	8	8	7	8	8	9	8	8	8	8	7	8	8	9	8	8	8	8	7	8	29.1	29.1	29.1	28.311	261	261	0	53.388	By MS/MS	By MS/MS	By MS/MS	By MS/MS	By MS/MS	By MS/MS	By MS/MS
1	B1Q3F1;K4C284;B1Q3F2;K4BQZ8;P54767;B1Q3F0	B1Q3F1	11;5;3;3;2;2	11;5;3;3;2;2	11;5;3;3;2;2	>tr|B1Q3F1|B1Q3F1_SOLLC Glutamate decarboxylase OS=Solanum lycopersicum GN=LeGAD2 PE=2 SV=1	6	11	11	11	8	11	8	10	9	9	8	7	8	11	8	10	9	9	8	7	8	11	8	10	9	9	8	7	24.9	24.9	24.9	56.957	503	503;497;484;493;502;502	0	107.59	By MS/MS	By MS/MS	By MS/MS	By MS/MS	By MS/MS	By MS/MS	By MS/MS
2	B2LW68;Q08697;K4B2M8	B2LW68;Q08697;K4B2M8	2;1;1	2;1;1	2;1;1	>tr|B2LW68|B2LW68_SOLLC PR1 protein OS=Solanum lycopersicum PE=2 SV=1;>sp|Q08697|PR1A_SOLLC Pathogenesis-related protein 1A1 OS=Solanum lycopersicum PE=2 SV=1;>tr|K4B2M8|K4B2M8_SOLLC Uncharacterized protein OS=Solanum lycopersicum PE=3 SV=1	3	2	2	2	1	2	2	2	2	2	2	1	1	2	2	2	2	2	2	1	1	2	2	2	2	2	2	1	12.8	12.8	12.8	20.123	179	179;175;176	0	20.119	By MS/MS	By MS/MS	By matching	By matching	By matching	By matching	By MS/MS
3	B5M9E5	B5M9E5	3	3	3	>tr|B5M9E5|B5M9E5_SOLLC Beta-glucosidase 08 OS=Solanum lycopersicum PE=2 SV=1	1	3	3	3	2	3	2	0	1	1	0	1	2	3	2	0	1	1	0	1	2	3	2	0	1	1	0	1	8.9	8.9	8.9	50.921	459	459	0	3.5651	By MS/MS	By MS/MS	By matching	By matching	By matching	By matching	By matching
4	C5IU71	C5IU71	6	6	6	>tr|C5IU71|C5IU71_SOLLC Chloroplast sedoheptulose-1,7-bisphosphatase OS=Solanum lycopersicum GN=SBPase PE=2 SV=1	1	6	6	6	3	3	2	6	4	6	5	3	3	3	2	6	4	6	5	3	3	3	2	6	4	6	5	3	15.2	15.2	15.2	42.587	394	394	0	7.964	By MS/MS	By matching	By MS/MS	By MS/MS	By matching	By matching	By MS/MS
5	CON__sp|P00760|TRY1_BOVIN	CON__sp|P00760|TRY1_BOVIN	8	8	8	>sp|P00760|TRY1_BOVIN Cationic trypsin OS=Bos taurus GN=Trp1 PE=1 SV=3	1	8	8	8	5	6	5	6	5	6	6	5	5	6	5	6	5	6	6	5	5	6	5	6	5	6	6	5	38.2	38.2	38.2	25.785	246	246	0	77.555	By MS/MS	By MS/MS	By MS/MS	By MS/MS	By MS/MS	By MS/MS	By MS/MS
6	CON__sp|P02533|K1C14_HUMAN	CON__sp|P02533|K1C14_HUMAN	8	4	2	>sp|P02533|K1C14_HUMAN Keratin, type I cytoskeletal 14 OS=Homo sapiens GN=KRT14 PE=1 SV=4	1	8	4	2	7	7	8	6	7	7	7	7	3	3	4	2	3	3	3	3	2	2	2	2	2	2	2	2	16.3	11	5.9	51.561	472	472	0	13.415	By MS/MS	By MS/MS	By MS/MS	By matching	By MS/MS	By MS/MS	By matching
7	CON__sp|P04259|K2C6B_HUMAN;CON__sp|P48668|K2C6C_HUMAN;CON__sp|P02538|K2C6A_HUMAN	CON__sp|P04259|K2C6B_HUMAN;CON__sp|P48668|K2C6C_HUMAN;CON__sp|P02538|K2C6A_HUMAN	8;7;7	4;4;4	2;2;2	>sp|P04259|K2C6B_HUMAN Keratin, type II cytoskeletal 6B OS=Homo sapiens GN=KRT6B PE=1 SV=5;>sp|P48668|K2C6C_HUMAN Keratin, type II cytoskeletal 6C OS=Homo sapiens GN=KRT6C PE=1 SV=3;>sp|P02538|K2C6A_HUMAN Keratin, type II cytoskeletal 6A OS=Homo sapiens GN	3	8	4	2	6	8	8	6	8	8	8	7	3	4	4	3	4	4	4	4	2	2	2	1	2	2	2	2	14.5	7.3	4.3	60.066	564	564;564;564	0	6.0914	By MS/MS	By matching	By MS/MS	By matching	By matching	By MS/MS	By MS/MS
8	CON__sp|P04264|K2C1_HUMAN	CON__sp|P04264|K2C1_HUMAN	33	33	28	>sp|P04264|K2C1_HUMAN Keratin, type II cytoskeletal 1 OS=Homo sapiens GN=KRT1 PE=1 SV=6	1	33	33	28	28	28	31	28	31	30	29	30	28	28	31	28	31	30	29	30	23	24	27	23	26	25	24	25	44.7	44.7	39.6	66.038	644	644	0	323.31	By MS/MS	By MS/MS	By MS/MS	By MS/MS	By MS/MS	By MS/MS	By MS/MS
9	CON__sp|P08779|K1C16_HUMAN	CON__sp|P08779|K1C16_HUMAN	7	1	1	>sp|P08779|K1C16_HUMAN Keratin, type I cytoskeletal 16 OS=Homo sapiens GN=KRT16 PE=1 SV=4	1	7	1	1	6	6	7	4	6	6	6	6	1	1	1	0	1	1	1	1	1	1	1	0	1	1	1	1	12.1	1.7	1.7	51.267	473	473	0.0023041	0.96818	By matching	By matching	By matching	By matching	By MS/MS	By matching	By matching
10	CON__sp|P13645|K1C10_HUMAN;CON__sp|Q14525|KT33B_HUMAN;CON__sp|Q15323|K1H1_HUMAN;CON__sp|Q14532|K1H2_HUMAN;CON__sp|Q92764|KRT35_HUMAN	CON__sp|P13645|K1C10_HUMAN	27;1;1;1;1	27;1;1;1;1	23;0;0;0;0	>sp|P13645|K1C10_HUMAN Keratin, type I cytoskeletal 10 OS=Homo sapiens GN=KRT10 PE=1 SV=6	5	27	27	23	22	23	24	24	24	22	22	22	22	23	24	24	24	22	22	22	18	19	20	20	20	18	18	18	55.8	55.8	51.5	58.826	584	584;404;416;448;455	0	253.36	By MS/MS	By MS/MS	By MS/MS	By MS/MS	By MS/MS	By MS/MS	By MS/MS
11	CON__sp|P13647|K2C5_HUMAN;CON__sp|O43790|KRT86_HUMAN;CON__sp|P78385|KRT83_HUMAN;CON__sp|Q14533|KRT81_HUMAN;CON__sp|P78386|KRT85_HUMAN;CON__sp|Q9NSB2|KRT84_HUMAN	CON__sp|P13647|K2C5_HUMAN	7;1;1;1;1;1	3;0;0;0;0;0	3;0;0;0;0;0	>sp|P13647|K2C5_HUMAN Keratin, type II cytoskeletal 5 OS=Homo sapiens GN=KRT5 PE=1 SV=3	6	7	3	3	5	6	7	4	5	6	6	5	2	2	3	1	1	2	2	1	2	2	3	1	1	2	2	1	11.5	4.9	4.9	62.378	590	590;486;493;505;507;600	0	9.7798	By matching	By matching	By MS/MS	By MS/MS	By MS/MS	By MS/MS	By MS/MS
12	CON__sp|P35527|K1C9_HUMAN	CON__sp|P35527|K1C9_HUMAN	22	21	21	>sp|P35527|K1C9_HUMAN Keratin, type I cytoskeletal 9 OS=Homo sapiens GN=KRT9 PE=1 SV=3	1	22	21	21	17	17	18	19	21	21	17	18	16	16	17	18	20	20	16	17	16	16	17	18	20	20	16	17	47.5	47.5	47.5	62.064	623	623	0	278.15	By MS/MS	By MS/MS	By MS/MS	By MS/MS	By MS/MS	By MS/MS	By MS/MS
13	CON__sp|P35908|K22E_HUMAN	CON__sp|P35908|K22E_HUMAN	18	16	14	>sp|P35908|K22E_HUMAN Keratin, type II cytoskeletal 2 epidermal OS=Homo sapiens GN=KRT2 PE=1 SV=2	1	18	16	14	15	14	14	11	15	15	15	13	13	12	12	9	13	13	13	11	12	10	10	8	11	11	11	10	35.4	32.2	29	65.432	639	639	0	98.658	By MS/MS	By MS/MS	By MS/MS	By MS/MS	By MS/MS	By MS/MS	By MS/MS
14	D3TI69	D3TI69	9	9	9	>tr|D3TI69|D3TI69_SOLLC Beta-hexosaminidase OS=Solanum lycopersicum PE=2 SV=1	1	9	9	9	8	9	8	6	8	9	8	8	8	9	8	6	8	9	8	8	8	9	8	6	8	9	8	8	18.1	18.1	18.1	64.023	575	575	0	57.242	By MS/MS	By MS/MS	By MS/MS	By MS/MS	By MS/MS	By MS/MS	By MS/MS
15	E0XN34;K4BAN8	E0XN34	24;1	24;1	24;1	>tr|E0XN34|E0XN34_SOLLC Alpha-mannosidase OS=Solanum lycopersicum PE=2 SV=1	2	24	24	24	10	23	21	22	23	22	22	8	10	23	21	22	23	22	22	8	10	23	21	22	23	22	22	8	27	27	27	116.48	1028	1028;1009	0	155.65	By MS/MS	By MS/MS	By MS/MS	By MS/MS	By MS/MS	By MS/MS	By MS/MS
16	E3UVW7;K4D6Q8;K4D6Q4;K4BVG3	E3UVW7	30;1;1;1	30;1;1;1	30;1;1;1	>tr|E3UVW7|E3UVW7_SOLLC Beta-galactosidase OS=Solanum lycopersicum PE=2 SV=3	4	30	30	30	25	28	27	28	29	29	28	27	25	28	27	28	29	29	28	27	25	28	27	28	29	29	28	27	41.8	41.8	41.8	93.212	852	852;33;695;735	0	240.9	By MS/MS	By MS/MS	By MS/MS	By MS/MS	By MS/MS	By MS/MS	By MS/MS
17	H1AC32;K4BTS4	H1AC32	11;1	11;1	11;1	>tr|H1AC32|H1AC32_SOLLC SlArf protein ( Xyl3protein ) OS=Solanum lycopersicum GN=SlArf PE=2 SV=1	2	11	11	11	2	9	11	8	8	7	9	6	2	9	11	8	8	7	9	6	2	9	11	8	8	7	9	6	14.8	14.8	14.8	85.487	777	777;772	0	16.362	By matching	By MS/MS	By MS/MS	By MS/MS	By MS/MS	By MS/MS	By MS/MS
18	H1ZXA9	H1ZXA9	12	2	2	>tr|H1ZXA9|H1ZXA9_SOLLC Heat shock protein 70 isoform 3 OS=Solanum lycopersicum GN=hsc70.3 PE=2 SV=1	1	12	2	2	8	10	9	8	8	9	10	6	1	1	1	1	1	1	1	1	1	1	1	1	1	1	1	1	22.3	3.7	3.7	71.389	651	651	0	7.4109	By MS/MS	By matching	By MS/MS	By matching	By matching	By matching	By MS/MS
20	K4ASJ5	K4ASJ5	11	11	10	>tr|K4ASJ5|K4ASJ5_SOLLC Peroxidase OS=Solanum lycopersicum PE=3 SV=1	1	11	11	10	9	11	10	10	11	11	11	8	9	11	10	10	11	11	11	8	8	10	9	9	10	10	10	7	44	44	44	35.818	327	327	0	89.911	By MS/MS	By MS/MS	By MS/MS	By MS/MS	By MS/MS	By MS/MS	By MS/MS
21	K4ASJ6	K4ASJ6	9	8	8	>tr|K4ASJ6|K4ASJ6_SOLLC Peroxidase OS=Solanum lycopersicum PE=3 SV=1	1	9	8	8	7	9	9	9	7	8	7	8	6	8	8	8	6	7	6	7	6	8	8	8	6	7	6	7	35.7	30.2	30.2	34.954	325	325	0	130.11	By MS/MS	By MS/MS	By MS/MS	By MS/MS	By MS/MS	By MS/MS	By MS/MS
23	K4ASX2	K4ASX2	3	2	2	>tr|K4ASX2|K4ASX2_SOLLC Uncharacterized protein OS=Solanum lycopersicum PE=4 SV=1	1	3	2	2	3	3	3	2	1	2	1	1	2	2	2	1	1	1	1	1	2	2	2	1	1	1	1	1	14.2	11.6	11.6	29.259	267	267	0	3.3676	By MS/MS	By matching	By matching	By matching	By matching	By matching	By matching
24	Q01412;K4AT60;K4AT59	Q01412;K4AT60	13;13;1	13;13;1	13;13;1	>sp|Q01412|E13A_SOLLC Glucan endo-1,3-beta-glucosidase A OS=Solanum lycopersicum PE=1 SV=1;>tr|K4AT60|K4AT60_SOLLC Uncharacterized protein OS=Solanum lycopersicum PE=3 SV=1	3	13	13	13	8	12	10	11	13	11	12	7	8	12	10	11	13	11	12	7	8	12	10	11	13	11	12	7	40.8	40.8	40.8	37.571	336	336;336;348	0	53.667	By MS/MS	By MS/MS	By MS/MS	By MS/MS	By MS/MS	By MS/MS	By MS/MS
25	K4ATB4	K4ATB4	17	3	3	>tr|K4ATB4|K4ATB4_SOLLC Uncharacterized protein OS=Solanum lycopersicum PE=3 SV=1	1	17	3	3	13	16	15	16	16	15	16	13	0	2	2	2	2	1	3	1	0	2	2	2	2	1	3	1	24	6.2	6.2	90.656	817	817	0.0023148	0.97085	By matching	By MS/MS	By matching	By MS/MS	By matching	By matching	By MS/MS
26	K4ATJ4	K4ATJ4	3	3	3	>tr|K4ATJ4|K4ATJ4_SOLLC Peptidyl-prolyl cis-trans isomerase OS=Solanum lycopersicum PE=3 SV=1	1	3	3	3	1	3	2	3	3	3	3	0	1	3	2	3	3	3	3	0	1	3	2	3	3	3	3	0	19	19	19	26.535	248	248	0	25.38	By matching	By MS/MS	By MS/MS	By MS/MS	By matching	By MS/MS	By MS/MS
27	K4ATR4;K4ATR5	K4ATR4	3;1	3;1	3;1	>tr|K4ATR4|K4ATR4_SOLLC Carboxypeptidase OS=Solanum lycopersicum PE=3 SV=1	2	3	3	3	2	3	0	2	2	3	1	2	2	3	0	2	2	3	1	2	2	3	0	2	2	3	1	2	8.6	8.6	8.6	54.98	490	490;420	0	2.8145	By MS/MS	By MS/MS	By matching	By matching	By matching	By MS/MS	By matching
29	K4AUE2;K4AW60	K4AUE2	15;1	15;1	14;0	>tr|K4AUE2|K4AUE2_SOLLC Peroxidase OS=Solanum lycopersicum PE=3 SV=1	2	15	15	14	10	12	13	13	12	12	13	13	10	12	13	13	12	12	13	13	9	11	12	12	11	11	12	12	41.2	41.2	41.2	35.838	330	330;332	0	236.73	By MS/MS	By MS/MS	By MS/MS	By MS/MS	By MS/MS	By MS/MS	By MS/MS
32	Q43779;P14830;K4AX22	Q43779;P14830;K4AX22	4;4;4	4;4;4	4;4;4	>sp|Q43779|SODC2_SOLLC Superoxide dismutase [Cu-Zn] 2 OS=Solanum lycopersicum GN=SODCC.5 PE=3 SV=3;>sp|P14830|SODC1_SOLLC Superoxide dismutase [Cu-Zn] 1 OS=Solanum lycopersicum GN=SODCC.1 PE=2 SV=2;>tr|K4AX22|K4AX22_SOLLC Superoxide dismutase [Cu-Zn] OS=So	3	4	4	4	3	3	3	4	3	3	3	3	3	3	3	4	3	3	3	3	3	3	3	4	3	3	3	3	28.3	28.3	28.3	15.241	152	152;152;152	0	22.586	By MS/MS	By MS/MS	By MS/MS	By MS/MS	By MS/MS	By MS/MS	By MS/MS
33	K4AX61	K4AX61	12	12	12	>tr|K4AX61|K4AX61_SOLLC Uncharacterized protein OS=Solanum lycopersicum PE=4 SV=1	1	12	12	12	12	12	12	11	10	12	10	12	12	12	12	11	10	12	10	12	12	12	12	11	10	12	10	12	27.6	27.6	27.6	54.041	485	485	0	106.54	By MS/MS	By MS/MS	By MS/MS	By MS/MS	By MS/MS	By MS/MS	By MS/MS
34	K4AX84	K4AX84	10	10	10	>tr|K4AX84|K4AX84_SOLLC Purple acid phosphatase OS=Solanum lycopersicum PE=3 SV=1	1	10	10	10	9	9	5	9	9	6	7	7	9	9	5	9	9	6	7	7	9	9	5	9	9	6	7	7	17.7	17.7	17.7	71.316	639	639	0	51.863	By MS/MS	By MS/MS	By matching	By MS/MS	By MS/MS	By MS/MS	By matching
35	K4AXB4	K4AXB4	2	2	2	>tr|K4AXB4|K4AXB4_SOLLC Uncharacterized protein OS=Solanum lycopersicum PE=4 SV=1	1	2	2	2	1	1	1	2	1	1	1	2	1	1	1	2	1	1	1	2	1	1	1	2	1	1	1	2	21.6	21.6	21.6	20.322	194	194	0	5.2269	By matching	By MS/MS	By matching	By MS/MS	By matching	By MS/MS	By MS/MS
36	K4AXG2	K4AXG2	10	10	10	>tr|K4AXG2|K4AXG2_SOLLC Uncharacterized protein OS=Solanum lycopersicum PE=4 SV=1	1	10	10	10	9	9	7	8	8	7	8	6	9	9	7	8	8	7	8	6	9	9	7	8	8	7	8	6	36.2	36.2	36.2	40.627	362	362	0	55.837	By MS/MS	By MS/MS	By MS/MS	By MS/MS	By MS/MS	By MS/MS	By MS/MS
38	K4AXP0;K4AXN7;K4AXN5;K4AXN6;K4AXN9;K4AXN8	K4AXP0	10;2;1;1;1;1	10;2;1;1;1;1	10;2;1;1;1;1	>tr|K4AXP0|K4AXP0_SOLLC Uncharacterized protein OS=Solanum lycopersicum PE=3 SV=1	6	10	10	10	9	9	10	10	9	9	10	10	9	9	10	10	9	9	10	10	9	9	10	10	9	9	10	10	26.2	26.2	26.2	47.301	428	428;576;201;292;430;433	0	34.688	By MS/MS	By MS/MS	By MS/MS	By MS/MS	By MS/MS	By MS/MS	By MS/MS
39	K4AXP3;K4AXP1	K4AXP3	3;1	3;1	3;1	>tr|K4AXP3|K4AXP3_SOLLC Uncharacterized protein OS=Solanum lycopersicum PE=3 SV=1	2	3	3	3	1	3	1	3	3	2	1	3	1	3	1	3	3	2	1	3	1	3	1	3	3	2	1	3	14.4	14.4	14.4	47	437	437;441	0	8.8564	By matching	By MS/MS	By matching	By MS/MS	By MS/MS	By MS/MS	By matching
40	K4AXP6	K4AXP6	2	2	2	>tr|K4AXP6|K4AXP6_SOLLC Uncharacterized protein OS=Solanum lycopersicum PE=3 SV=1	1	2	2	2	1	1	1	2	2	2	1	1	1	1	1	2	2	2	1	1	1	1	1	2	2	2	1	1	6.8	6.8	6.8	46.548	438	438	0	1.8396	By matching	By matching	By matching	By matching	By matching	By MS/MS	By MS/MS
42	K4AXX2;K4AXX3;K4B2W8	K4AXX2	3;1;1	3;1;1	3;1;1	>tr|K4AXX2|K4AXX2_SOLLC Uncharacterized protein OS=Solanum lycopersicum PE=4 SV=1	3	3	3	3	3	3	3	3	2	3	3	3	3	3	3	3	2	3	3	3	3	3	3	3	2	3	3	3	15	15	15	25.598	226	226;178;232	0	6.951	By MS/MS	By MS/MS	By MS/MS	By MS/MS	By MS/MS	By MS/MS	By MS/MS
43	K4AY49	K4AY49	4	4	4	>tr|K4AY49|K4AY49_SOLLC Uncharacterized protein OS=Solanum lycopersicum PE=4 SV=1	1	4	4	4	3	4	2	3	3	3	1	4	3	4	2	3	3	3	1	4	3	4	2	3	3	3	1	4	13.4	13.4	13.4	47.604	425	425	0	52.219	By MS/MS	By MS/MS	By matching	By MS/MS	By MS/MS	By matching	By matching
44	K4AYG4	K4AYG4	5	1	1	>tr|K4AYG4|K4AYG4_SOLLC Uncharacterized protein OS=Solanum lycopersicum PE=4 SV=1	1	5	1	1	5	3	4	3	4	4	4	5	1	1	1	1	1	1	1	1	1	1	1	1	1	1	1	1	5.7	1.4	1.4	83.64	769	769	0.0090909	0.89532	By matching	By MS/MS	By MS/MS	By matching	By MS/MS	By MS/MS	By MS/MS
45	K4AYP9	K4AYP9	3	3	3	>tr|K4AYP9|K4AYP9_SOLLC Uncharacterized protein OS=Solanum lycopersicum PE=4 SV=1	1	3	3	3	1	2	2	2	2	2	2	3	1	2	2	2	2	2	2	3	1	2	2	2	2	2	2	3	21	21	21	20.605	186	186	0	6.832	By MS/MS	By matching	By matching	By MS/MS	By MS/MS	By MS/MS	By matching
46	P47921;K4AYT8	P47921;K4AYT8	2;2	2;2	2;2	>sp|P47921|NDK_SOLLC Nucleoside diphosphate kinase (Fragment) OS=Solanum lycopersicum PE=2 SV=1;>tr|K4AYT8|K4AYT8_SOLLC Nucleoside diphosphate kinase OS=Solanum lycopersicum PE=3 SV=1	2	2	2	2	2	2	2	2	2	2	2	1	2	2	2	2	2	2	2	1	2	2	2	2	2	2	2	1	9.7	9.7	9.7	15.679	144	144;148	0	5.8631	By matching	By MS/MS	By matching	By matching	By matching	By MS/MS	By MS/MS
47	K4AYV3	K4AYV3	3	3	3	>tr|K4AYV3|K4AYV3_SOLLC Uncharacterized protein OS=Solanum lycopersicum PE=4 SV=1	1	3	3	3	3	3	3	3	3	3	3	3	3	3	3	3	3	3	3	3	3	3	3	3	3	3	3	3	22.2	22.2	22.2	19.383	189	189	0	48.639	By MS/MS	By MS/MS	By MS/MS	By MS/MS	By MS/MS	By MS/MS	By MS/MS
49	K4AZ93	K4AZ93	9	9	9	>tr|K4AZ93|K4AZ93_SOLLC Uncharacterized protein OS=Solanum lycopersicum PE=4 SV=1	1	9	9	9	7	8	7	7	7	7	7	7	7	8	7	7	7	7	7	7	7	8	7	7	7	7	7	7	30.7	30.7	30.7	43.073	414	414	0	80.236	By MS/MS	By MS/MS	By MS/MS	By MS/MS	By MS/MS	By MS/MS	By MS/MS
51	K4B033	K4B033	13	13	13	>tr|K4B033|K4B033_SOLLC Uncharacterized protein OS=Solanum lycopersicum PE=3 SV=1	1	13	13	13	10	12	12	11	12	12	12	12	10	12	12	11	12	12	12	12	10	12	12	11	12	12	12	12	31.2	31.2	31.2	47.719	443	443	0	76.737	By MS/MS	By MS/MS	By MS/MS	By MS/MS	By MS/MS	By MS/MS	By MS/MS
52	K4B088	K4B088	4	2	1	>tr|K4B088|K4B088_SOLLC Uncharacterized protein OS=Solanum lycopersicum PE=4 SV=1	1	4	2	1	3	4	4	3	3	3	3	4	2	2	2	2	2	2	2	2	1	1	1	1	1	1	1	1	6.3	2.6	1.5	72.641	662	662	0	4.2329	By matching	By MS/MS	By MS/MS	By MS/MS	By matching	By MS/MS	By MS/MS
53	K4B0D3	K4B0D3	5	5	5	>tr|K4B0D3|K4B0D3_SOLLC Uncharacterized protein OS=Solanum lycopersicum PE=3 SV=1	1	5	5	5	5	5	5	4	4	4	4	3	5	5	5	4	4	4	4	3	5	5	5	4	4	4	4	3	25.3	25.3	25.3	31.147	293	293	0	7.6877	By MS/MS	By MS/MS	By MS/MS	By MS/MS	By MS/MS	By MS/MS	By MS/MS
54	K4B0Q2;K4CAM0	K4B0Q2	16;1	16;1	15;0	>tr|K4B0Q2|K4B0Q2_SOLLC Uncharacterized protein OS=Solanum lycopersicum PE=4 SV=1	2	16	16	15	11	14	12	12	12	12	11	8	11	14	12	12	12	12	11	8	10	13	11	12	12	11	10	7	45.9	45.9	45.9	45.739	414	414;361	0	191.02	By MS/MS	By MS/MS	By MS/MS	By MS/MS	By MS/MS	By MS/MS	By MS/MS
56	K4B111;Q6DUX3;K4B112	K4B111;Q6DUX3;K4B112	4;3;3	4;3;3	4;3;3	>tr|K4B111|K4B111_SOLLC Uncharacterized protein OS=Solanum lycopersicum PE=3 SV=1;>sp|Q6DUX3|TCTP_SOLLC Translationally-controlled tumor protein homolog OS=Solanum lycopersicum GN=TCTP PE=2 SV=1;>tr|K4B112|K4B112_SOLLC Uncharacterized protein OS=Solanum ly	3	4	4	4	4	4	4	4	4	4	4	4	4	4	4	4	4	4	4	4	4	4	4	4	4	4	4	4	27.4	27.4	27.4	18.912	168	168;168;168	0	17.968	By MS/MS	By MS/MS	By MS/MS	By MS/MS	By MS/MS	By MS/MS	By MS/MS
57	K4B143	K4B143	6	6	6	>tr|K4B143|K4B143_SOLLC Uncharacterized protein OS=Solanum lycopersicum PE=4 SV=1	1	6	6	6	5	6	3	4	4	6	3	5	5	6	3	4	4	6	3	5	5	6	3	4	4	6	3	5	33	33	33	23.231	206	206	0	24.84	By MS/MS	By MS/MS	By matching	By MS/MS	By MS/MS	By MS/MS	By matching
58	K4B166	K4B166	2	2	2	>tr|K4B166|K4B166_SOLLC Uncharacterized protein OS=Solanum lycopersicum PE=3 SV=1	1	2	2	2	1	1	2	0	1	1	1	0	1	1	2	0	1	1	1	0	1	1	2	0	1	1	1	0	8.9	8.9	8.9	39.454	359	359	0	6.2174	By matching	By matching	By MS/MS	By matching	By matching	By matching	By MS/MS
59	K4B172	K4B172	8	8	8	>tr|K4B172|K4B172_SOLLC Uncharacterized protein OS=Solanum lycopersicum PE=3 SV=1	1	8	8	8	5	6	7	6	7	6	6	6	5	6	7	6	7	6	6	6	5	6	7	6	7	6	6	6	21.6	21.6	21.6	47.602	417	417	0	15.192	By MS/MS	By MS/MS	By MS/MS	By MS/MS	By MS/MS	By MS/MS	By MS/MS
61	K4B1G1	K4B1G1	3	3	3	>tr|K4B1G1|K4B1G1_SOLLC Uncharacterized protein OS=Solanum lycopersicum PE=4 SV=1	1	3	3	3	3	2	2	2	2	2	2	2	3	2	2	2	2	2	2	2	3	2	2	2	2	2	2	2	11.9	11.9	11.9	29.21	268	268	0	7.6552	By MS/MS	By MS/MS	By MS/MS	By MS/MS	By MS/MS	By MS/MS	By matching
62	K4B1G8;K4B1G7	K4B1G8;K4B1G7	4;4	4;4	4;4	>tr|K4B1G8|K4B1G8_SOLLC Uncharacterized protein OS=Solanum lycopersicum PE=3 SV=1;>tr|K4B1G7|K4B1G7_SOLLC Uncharacterized protein OS=Solanum lycopersicum PE=3 SV=1	2	4	4	4	3	4	3	4	2	3	2	3	3	4	3	4	2	3	2	3	3	4	3	4	2	3	2	3	18.6	18.6	18.6	23.329	220	220;220	0	5.1803	By MS/MS	By MS/MS	By matching	By MS/MS	By MS/MS	By matching	By MS/MS
64	K4B215	K4B215	3	3	3	>tr|K4B215|K4B215_SOLLC Uncharacterized protein OS=Solanum lycopersicum PE=4 SV=1	1	3	3	3	3	2	1	2	3	2	2	2	3	2	1	2	3	2	2	2	3	2	1	2	3	2	2	2	43	43	43	12.254	114	114	0	11.281	By MS/MS	By matching	By MS/MS	By MS/MS	By MS/MS	By MS/MS	By matching
65	K4B267;K4CZW8	K4B267	17;2	17;2	17;2	>tr|K4B267|K4B267_SOLLC Uncharacterized protein OS=Solanum lycopersicum PE=4 SV=1	2	17	17	17	11	17	16	14	15	14	14	10	11	17	16	14	15	14	14	10	11	17	16	14	15	14	14	10	27.5	27.5	27.5	85.206	778	778;770	0	133.43	By MS/MS	By MS/MS	By MS/MS	By MS/MS	By MS/MS	By MS/MS	By MS/MS
66	K4B273	K4B273	3	3	3	>tr|K4B273|K4B273_SOLLC Uncharacterized protein OS=Solanum lycopersicum PE=3 SV=1	1	3	3	3	2	2	3	2	2	3	2	2	2	2	3	2	2	3	2	2	2	2	3	2	2	3	2	2	14	14	14	18.669	186	186	0	32.544	By MS/MS	By MS/MS	By matching	By MS/MS	By matching	By MS/MS	By MS/MS
67	K4B277	K4B277	14	14	13	>tr|K4B277|K4B277_SOLLC Peroxidase OS=Solanum lycopersicum PE=3 SV=1	1	14	14	13	13	10	6	13	13	12	7	11	13	10	6	13	13	12	7	11	12	10	6	13	13	11	6	11	55.1	55.1	55.1	35.955	332	332	0	162.08	By MS/MS	By MS/MS	By MS/MS	By MS/MS	By MS/MS	By MS/MS	By MS/MS
68	K4B2J4;K4B2I9	K4B2J4;K4B2I9	2;2	2;2	1;1	>tr|K4B2J4|K4B2J4_SOLLC Uncharacterized protein OS=Solanum lycopersicum PE=3 SV=1;>tr|K4B2I9|K4B2I9_SOLLC Uncharacterized protein OS=Solanum lycopersicum PE=3 SV=1	2	2	2	1	1	2	2	2	1	1	1	2	1	2	2	2	1	1	1	2	1	1	1	1	0	1	1	1	3.9	3.9	2.2	71.876	670	670;681	0.0023641	0.99991	By matching	By MS/MS	By matching	By MS/MS	By matching	By matching	By matching
69	K4B2L1	K4B2L1	4	4	4	>tr|K4B2L1|K4B2L1_SOLLC Uncharacterized protein OS=Solanum lycopersicum PE=4 SV=1	1	4	4	4	4	4	3	4	4	4	4	3	4	4	3	4	4	4	4	3	4	4	3	4	4	4	4	3	16.6	16.6	16.6	32.382	290	290	0	6.4293	By MS/MS	By MS/MS	By MS/MS	By MS/MS	By MS/MS	By MS/MS	By MS/MS
70	K4B2Y3	K4B2Y3	8	8	8	>tr|K4B2Y3|K4B2Y3_SOLLC Uncharacterized protein OS=Solanum lycopersicum PE=4 SV=1	1	8	8	8	7	7	6	6	7	6	6	4	7	7	6	6	7	6	6	4	7	7	6	6	7	6	6	4	28.8	28.8	28.8	41.548	382	382	0	41.352	By MS/MS	By MS/MS	By matching	By MS/MS	By MS/MS	By MS/MS	By MS/MS
72	K4B375	K4B375	2	2	2	>tr|K4B375|K4B375_SOLLC Uncharacterized protein OS=Solanum lycopersicum PE=4 SV=1	1	2	2	2	0	1	2	2	1	1	2	0	0	1	2	2	1	1	2	0	0	1	2	2	1	1	2	0	2.1	2.1	2.1	120.59	1072	1072	0	3.1627	By matching	By matching	By MS/MS	By matching	By matching	By matching	By matching
73	K4B399	K4B399	2	2	2	>tr|K4B399|K4B399_SOLLC Uncharacterized protein OS=Solanum lycopersicum PE=3 SV=1	1	2	2	2	1	1	1	2	2	1	1	1	1	1	1	2	2	1	1	1	1	1	1	2	2	1	1	1	4.5	4.5	4.5	101.85	940	940	0	8.9946	By MS/MS	By MS/MS	By matching	By MS/MS	By MS/MS	By MS/MS	By MS/MS
74	K4B3H0	K4B3H0	12	11	11	>tr|K4B3H0|K4B3H0_SOLLC Uncharacterized protein OS=Solanum lycopersicum PE=3 SV=1	1	12	11	11	10	11	11	12	10	12	11	11	9	10	10	11	9	11	10	10	9	10	10	11	9	11	10	10	41.4	39.5	39.5	50.304	473	473	0	94.291	By MS/MS	By MS/MS	By MS/MS	By MS/MS	By MS/MS	By MS/MS	By MS/MS
75	K4B3X5;K4D180	K4B3X5;K4D180	4;2	4;2	3;1	>tr|K4B3X5|K4B3X5_SOLLC Uncharacterized protein OS=Solanum lycopersicum PE=3 SV=1;>tr|K4D180|K4D180_SOLLC Uncharacterized protein OS=Solanum lycopersicum PE=3 SV=1	2	4	4	3	3	3	2	4	3	3	2	2	3	3	2	4	3	3	2	2	2	2	1	3	2	2	1	1	18.4	18.4	16	34.665	326	326;312	0	38.011	By matching	By MS/MS	By MS/MS	By MS/MS	By MS/MS	By MS/MS	By MS/MS
76	K4B3Y3	K4B3Y3	5	5	5	>tr|K4B3Y3|K4B3Y3_SOLLC Uncharacterized protein OS=Solanum lycopersicum PE=4 SV=1	1	5	5	5	3	5	4	4	3	5	3	2	3	5	4	4	3	5	3	2	3	5	4	4	3	5	3	2	8.2	8.2	8.2	87.681	801	801	0	11.025	By MS/MS	By MS/MS	By MS/MS	By MS/MS	By MS/MS	By matching	By MS/MS
77	K4B469	K4B469	4	4	4	>tr|K4B469|K4B469_SOLLC Uncharacterized protein OS=Solanum lycopersicum PE=4 SV=1	1	4	4	4	3	3	3	2	2	2	3	4	3	3	3	2	2	2	3	4	3	3	3	2	2	2	3	4	13.3	13.3	13.3	37.241	345	345	0	3.4558	By matching	By MS/MS	By MS/MS	By MS/MS	By MS/MS	By matching	By MS/MS
78	K4B533	K4B533	8	8	8	>tr|K4B533|K4B533_SOLLC Uncharacterized protein OS=Solanum lycopersicum PE=4 SV=1	1	8	8	8	5	8	8	8	8	7	8	4	5	8	8	8	8	7	8	4	5	8	8	8	8	7	8	4	15.2	15.2	15.2	60.692	541	541	0	11.196	By MS/MS	By MS/MS	By MS/MS	By matching	By MS/MS	By MS/MS	By MS/MS
79	K4B553	K4B553	6	6	6	>tr|K4B553|K4B553_SOLLC Ferredoxin--NADP reductase OS=Solanum lycopersicum PE=3 SV=1	1	6	6	6	4	4	5	6	5	5	6	5	4	4	5	6	5	5	6	5	4	4	5	6	5	5	6	5	14.7	14.7	14.7	41.723	374	374	0	27.326	By matching	By MS/MS	By MS/MS	By MS/MS	By matching	By matching	By MS/MS
80	K4B667;Q05537	K4B667;Q05537	6;4	6;4	6;4	>tr|K4B667|K4B667_SOLLC Uncharacterized protein OS=Solanum lycopersicum PE=3 SV=1;>sp|Q05537|CHID_SOLLC Basic endochitinase (Fragment) OS=Solanum lycopersicum GN=CHI14 PE=2 SV=1	2	6	6	6	3	5	5	6	6	6	6	4	3	5	5	6	6	6	6	4	3	5	5	6	6	6	6	4	29.7	29.7	29.7	28.519	263	263;246	0	18.248	By MS/MS	By MS/MS	By MS/MS	By MS/MS	By MS/MS	By MS/MS	By MS/MS
81	K4B6T2;K4BA79;K4CFF4;K4CFF3;K4CFF2;K4D4Y3;K4D4Y2;K4C2K8	K4B6T2	13;1;1;1;1;1;1;1	12;1;1;1;1;1;1;1	12;1;1;1;1;1;1;1	>tr|K4B6T2|K4B6T2_SOLLC Peroxidase OS=Solanum lycopersicum PE=3 SV=1	8	13	12	12	10	12	6	12	12	11	10	8	9	12	6	12	12	10	9	8	9	12	6	12	12	10	9	8	55.8	53.1	53.1	35.449	326	326;324;329;329;329;332;332;334	0	141.83	By MS/MS	By MS/MS	By MS/MS	By MS/MS	By MS/MS	By MS/MS	By MS/MS
82	K4B6V2;K4BCI5	K4B6V2;K4BCI5	3;2	3;2	3;2	>tr|K4B6V2|K4B6V2_SOLLC Uncharacterized protein OS=Solanum lycopersicum PE=4 SV=1;>tr|K4BCI5|K4BCI5_SOLLC Uncharacterized protein OS=Solanum lycopersicum PE=4 SV=1	2	3	3	3	1	2	2	1	2	3	2	2	1	2	2	1	2	3	2	2	1	2	2	1	2	3	2	2	7.1	7.1	7.1	60.214	539	539;538	0	4.8133	By MS/MS	By MS/MS	By MS/MS	By matching	By MS/MS	By matching	By matching
83	K4B6X9	K4B6X9	7	7	7	>tr|K4B6X9|K4B6X9_SOLLC Uncharacterized protein OS=Solanum lycopersicum PE=4 SV=1	1	7	7	7	5	7	6	7	5	7	7	5	5	7	6	7	5	7	7	5	5	7	6	7	5	7	7	5	55	55	55	19.562	180	180	0	42.32	By MS/MS	By MS/MS	By MS/MS	By MS/MS	By MS/MS	By MS/MS	By MS/MS
84	K4BC24;K4B740;K4C8C8;K4BL40	K4BC24;K4B740;K4C8C8;K4BL40	2;2;1;1	2;2;1;1	2;2;1;1	>tr|K4BC24|K4BC24_SOLLC UDP-glucose 6-dehydrogenase OS=Solanum lycopersicum PE=3 SV=1;>tr|K4B740|K4B740_SOLLC UDP-glucose 6-dehydrogenase OS=Solanum lycopersicum PE=3 SV=1;>tr|K4C8C8|K4C8C8_SOLLC UDP-glucose 6-dehydrogenase OS=Solanum lycopersicum PE=3 SV=	4	2	2	2	2	1	2	1	1	0	0	1	2	1	2	1	1	0	0	1	2	1	2	1	1	0	0	1	5.7	5.7	5.7	34.342	316	316;509;480;480	0	4.751	By MS/MS	By MS/MS	By matching	By matching	By matching	By matching	By matching
85	K4B7P1	K4B7P1	2	2	2	>tr|K4B7P1|K4B7P1_SOLLC Uncharacterized protein OS=Solanum lycopersicum PE=3 SV=1	1	2	2	2	2	1	1	2	1	2	1	1	2	1	1	2	1	2	1	1	2	1	1	2	1	2	1	1	7.7	7.7	7.7	39.009	352	352	0	4.0015	By MS/MS	By matching	By matching	By MS/MS	By matching	By MS/MS	By matching
86	K4B7U5;K4B564	K4B7U5;K4B564	2;1	2;1	2;1	>tr|K4B7U5|K4B7U5_SOLLC Uncharacterized protein OS=Solanum lycopersicum PE=3 SV=1;>tr|K4B564|K4B564_SOLLC Uncharacterized protein OS=Solanum lycopersicum PE=3 SV=1	2	2	2	2	1	1	1	2	2	2	1	1	1	1	1	2	2	2	1	1	1	1	1	2	2	2	1	1	4.3	4.3	4.3	91.14	854	854;704	0	3.1188	By matching	By matching	By matching	By MS/MS	By MS/MS	By matching	By matching
87	K4B7U9	K4B7U9	10	10	9	>tr|K4B7U9|K4B7U9_SOLLC Uncharacterized protein OS=Solanum lycopersicum PE=3 SV=1	1	10	10	9	6	9	8	9	9	8	8	7	6	9	8	9	9	8	8	7	6	8	8	8	8	7	8	7	13.6	13.6	12.1	95.059	841	841	0	22.141	By MS/MS	By MS/MS	By MS/MS	By MS/MS	By MS/MS	By MS/MS	By MS/MS
91	K4B8E7	K4B8E7	2	2	2	>tr|K4B8E7|K4B8E7_SOLLC Uncharacterized protein OS=Solanum lycopersicum PE=4 SV=1	1	2	2	2	1	2	1	2	2	2	1	1	1	2	1	2	2	2	1	1	1	2	1	2	2	2	1	1	7.4	7.4	7.4	41.645	380	380	0	8.0654	By MS/MS	By MS/MS	By matching	By MS/MS	By MS/MS	By MS/MS	By matching
93	K4B8T1	K4B8T1	2	2	2	>tr|K4B8T1|K4B8T1_SOLLC Uncharacterized protein OS=Solanum lycopersicum PE=3 SV=1	1	2	2	2	1	2	2	2	2	2	2	2	1	2	2	2	2	2	2	2	1	2	2	2	2	2	2	2	10.7	10.7	10.7	38.251	345	345	0	35.455	By MS/MS	By MS/MS	By MS/MS	By MS/MS	By MS/MS	By MS/MS	By MS/MS
94	K4B989	K4B989	3	3	3	>tr|K4B989|K4B989_SOLLC Uncharacterized protein OS=Solanum lycopersicum PE=4 SV=1	1	3	3	3	2	2	3	2	2	1	2	1	2	2	3	2	2	1	2	1	2	2	3	2	2	1	2	1	5.1	5.1	5.1	70.635	628	628	0	5.3176	By matching	By matching	By MS/MS	By MS/MS	By matching	By matching	By MS/MS
96	K4B9P3;K4B9P2;K4B9P1;K4AZ46;K4BHN9;K4B129;K4BIG2;K4CHA0;Q96576;K4AWN9;Q96575;P09607;K4CVB0;K4B0T1;K4C3U9;K4C0Z2;K4BN62;K4C2B4	K4B9P3;K4B9P2;K4B9P1	12;9;6;1;1;1;1;1;1;1;1;1;1;1;1;1;1;1	12;9;6;1;1;1;1;1;1;1;1;1;1;1;1;1;1;1	11;8;5;0;1;1;1;1;1;0;0;0;1;0;0;0;0;0	>tr|K4B9P3|K4B9P3_SOLLC Pectinesterase OS=Solanum lycopersicum PE=4 SV=1;>tr|K4B9P2|K4B9P2_SOLLC Pectinesterase OS=Solanum lycopersicum PE=4 SV=1;>tr|K4B9P1|K4B9P1_SOLLC Pectinesterase OS=Solanum lycopersicum PE=4 SV=1	18	12	12	11	10	11	11	10	12	10	12	9	10	11	11	10	12	10	12	9	9	10	10	10	11	9	11	9	30.1	30.1	28.8	59.396	548	548;546;493;476;498;520;523;543;544;548;550;550;560;560;564;576;583;627	0	118.63	By MS/MS	By MS/MS	By MS/MS	By MS/MS	By MS/MS	By MS/MS	By MS/MS
98	K4B9T4	K4B9T4	8	8	8	>tr|K4B9T4|K4B9T4_SOLLC Lactoylglutathione lyase OS=Solanum lycopersicum PE=3 SV=1	1	8	8	8	6	7	8	7	7	8	8	5	6	7	8	7	7	8	8	5	6	7	8	7	7	8	8	5	24.9	24.9	24.9	38.542	341	341	0	16.674	By MS/MS	By MS/MS	By MS/MS	By MS/MS	By MS/MS	By MS/MS	By MS/MS
99	K4BA95;K4BFH1	K4BA95;K4BFH1	2;1	2;1	2;1	>tr|K4BA95|K4BA95_SOLLC Thioredoxin reductase OS=Solanum lycopersicum PE=3 SV=1;>tr|K4BFH1|K4BFH1_SOLLC Thioredoxin reductase OS=Solanum lycopersicum PE=3 SV=1	2	2	2	2	2	2	2	2	2	2	2	1	2	2	2	2	2	2	2	1	2	2	2	2	2	2	2	1	7.6	7.6	7.6	39.099	367	367;328	0	10.919	By matching	By matching	By MS/MS	By MS/MS	By MS/MS	By MS/MS	By MS/MS
100	K4BAL4	K4BAL4	6	6	6	>tr|K4BAL4|K4BAL4_SOLLC Uncharacterized protein OS=Solanum lycopersicum PE=3 SV=1	1	6	6	6	6	6	5	6	6	6	6	6	6	6	5	6	6	6	6	6	6	6	5	6	6	6	6	6	12.4	12.4	12.4	58.093	539	539	0	96.404	By MS/MS	By MS/MS	By MS/MS	By MS/MS	By MS/MS	By MS/MS	By MS/MS
102	K4BAP4	K4BAP4	4	4	4	>tr|K4BAP4|K4BAP4_SOLLC Uncharacterized protein OS=Solanum lycopersicum PE=4 SV=1	1	4	4	4	4	3	3	3	3	3	3	3	4	3	3	3	3	3	3	3	4	3	3	3	3	3	3	3	9.8	9.8	9.8	33.666	326	326	0	2.7756	By MS/MS	By MS/MS	By matching	By MS/MS	By matching	By matching	By matching
104	K4BAP9;K4B6A3	K4BAP9	6;2	6;2	6;2	>tr|K4BAP9|K4BAP9_SOLLC Ferredoxin--NADP reductase OS=Solanum lycopersicum PE=3 SV=1	2	6	6	6	4	4	5	6	4	6	4	5	4	4	5	6	4	6	4	5	4	4	5	6	4	6	4	5	19.7	19.7	19.7	41.603	370	370;362	0	13.145	By MS/MS	By MS/MS	By MS/MS	By MS/MS	By matching	By MS/MS	By MS/MS
105	K4BAW0;K4B6C3	K4BAW0	4;1	4;1	4;1	>tr|K4BAW0|K4BAW0_SOLLC Fructose-bisphosphate aldolase OS=Solanum lycopersicum PE=3 SV=1	2	4	4	4	3	3	3	4	3	3	3	3	3	3	3	4	3	3	3	3	3	3	3	4	3	3	3	3	16.6	16.6	16.6	42.397	392	392;395	0	10.126	By MS/MS	By MS/MS	By MS/MS	By MS/MS	By MS/MS	By MS/MS	By MS/MS
106	K4BAZ3;K4B6D9;K4DD95;K4BFP3	K4BAZ3	8;2;1;1	4;0;0;0	2;0;0;0	>tr|K4BAZ3|K4BAZ3_SOLLC Peroxidase OS=Solanum lycopersicum PE=3 SV=1	4	8	4	2	8	8	3	8	8	7	7	4	4	4	1	4	4	3	3	2	2	2	0	2	2	2	1	1	33.4	19	9.9	36.369	332	332;331;214;333	0	7.5224	By MS/MS	By matching	By matching	By MS/MS	By MS/MS	By matching	By matching
107	K4BAZ4;K4BFP1	K4BAZ4	8;2	8;2	3;0	>tr|K4BAZ4|K4BAZ4_SOLLC Peroxidase OS=Solanum lycopersicum PE=3 SV=1	2	8	8	3	8	5	3	8	7	8	8	5	8	5	3	8	7	8	8	5	3	1	1	3	2	3	3	2	38.3	38.3	18.7	36.509	332	332;330	0	49.412	By MS/MS	By MS/MS	By matching	By MS/MS	By MS/MS	By MS/MS	By MS/MS
108	K4BAZ5	K4BAZ5	7	1	1	>tr|K4BAZ5|K4BAZ5_SOLLC Peroxidase OS=Solanum lycopersicum PE=3 SV=1	1	7	1	1	7	5	3	6	6	5	6	3	1	0	0	0	0	0	0	0	1	0	0	0	0	0	0	0	35.5	4	4	29.834	273	273	0.002445	1.1547	By MS/MS	By matching	By matching	By matching	By matching	By matching	By matching
109	K4BB24	K4BB24	2	2	2	>tr|K4BB24|K4BB24_SOLLC Uncharacterized protein OS=Solanum lycopersicum PE=4 SV=1	1	2	2	2	1	2	2	2	2	2	2	1	1	2	2	2	2	2	2	1	1	2	2	2	2	2	2	1	12.9	12.9	12.9	33.317	302	302	0	4.5709	By matching	By matching	By MS/MS	By MS/MS	By MS/MS	By MS/MS	By MS/MS
111	K4BBH7	K4BBH7	14	14	14	>tr|K4BBH7|K4BBH7_SOLLC Uncharacterized protein OS=Solanum lycopersicum PE=3 SV=1	1	14	14	14	8	13	11	14	14	14	13	8	8	13	11	14	14	14	13	8	8	13	11	14	14	14	13	8	60	60	60	38.77	345	345	0	103.58	By MS/MS	By MS/MS	By MS/MS	By MS/MS	By MS/MS	By MS/MS	By MS/MS
112	K4BBM6	K4BBM6	3	3	3	>tr|K4BBM6|K4BBM6_SOLLC Peroxidase OS=Solanum lycopersicum PE=3 SV=1	1	3	3	3	2	3	0	2	3	3	2	1	2	3	0	2	3	3	2	1	2	3	0	2	3	3	2	1	13.7	13.7	13.7	36.361	328	328	0	9.918	By MS/MS	By matching	By matching	By matching	By MS/MS	By matching	By matching
114	K4BBQ9	K4BBQ9	2	2	2	>tr|K4BBQ9|K4BBQ9_SOLLC Uncharacterized protein OS=Solanum lycopersicum PE=4 SV=1	1	2	2	2	2	2	1	2	2	2	2	1	2	2	1	2	2	2	2	1	2	2	1	2	2	2	2	1	11.5	11.5	11.5	29.446	270	270	0	24.513	By MS/MS	By MS/MS	By matching	By matching	By matching	By matching	By MS/MS
115	K4BUD9;K4BBU4;K4CIH7;K4BCY5	K4BUD9;K4BBU4;K4CIH7;K4BCY5	2;2;2;1	2;2;2;1	2;2;2;1	>tr|K4BUD9|K4BUD9_SOLLC Tubulin alpha chain OS=Solanum lycopersicum PE=3 SV=1;>tr|K4BBU4|K4BBU4_SOLLC Tubulin alpha chain OS=Solanum lycopersicum PE=3 SV=1;>tr|K4CIH7|K4CIH7_SOLLC Tubulin alpha chain OS=Solanum lycopersicum PE=3 SV=1;>tr|K4BCY5|K4BCY5_SOLL	4	2	2	2	1	2	1	2	2	2	1	0	1	2	1	2	2	2	1	0	1	2	1	2	2	2	1	0	6.4	6.4	6.4	49.772	450	450;450;451;451	0	3.3924	By MS/MS	By MS/MS	By matching	By MS/MS	By MS/MS	By matching	By matching
116	K4BCJ4	K4BCJ4	16	16	7	>tr|K4BCJ4|K4BCJ4_SOLLC Peroxidase OS=Solanum lycopersicum PE=3 SV=1	1	16	16	7	14	16	13	14	16	15	14	15	14	16	13	14	16	15	14	15	6	7	5	6	7	6	6	7	50.9	50.9	26.6	36.754	334	334	0	177.34	By MS/MS	By MS/MS	By MS/MS	By MS/MS	By MS/MS	By MS/MS	By MS/MS
117	K4BCJ6	K4BCJ6	13	4	4	>tr|K4BCJ6|K4BCJ6_SOLLC Peroxidase OS=Solanum lycopersicum PE=3 SV=1	1	13	4	4	10	13	11	12	13	12	12	9	2	4	3	4	4	3	4	1	2	4	3	4	4	3	4	1	45.8	19.2	19.2	36.843	334	334	0	19.572	By matching	By MS/MS	By MS/MS	By MS/MS	By MS/MS	By MS/MS	By MS/MS
118	K4BCJ8	K4BCJ8	6	6	6	>tr|K4BCJ8|K4BCJ8_SOLLC Patatin OS=Solanum lycopersicum PE=3 SV=1	1	6	6	6	6	6	3	5	6	5	3	6	6	6	3	5	6	5	3	6	6	6	3	5	6	5	3	6	25.2	25.2	25.2	44.991	412	412	0	21.074	By MS/MS	By MS/MS	By matching	By MS/MS	By MS/MS	By MS/MS	By matching
119	K4BD54;K4CCK2	K4BD54	6;2	4;0	4;0	>tr|K4BD54|K4BD54_SOLLC Peroxidase OS=Solanum lycopersicum PE=3 SV=1	2	6	4	4	6	6	5	5	5	5	5	6	4	4	3	3	3	3	3	4	4	4	3	3	3	3	3	4	18.7	14.5	14.5	36.354	332	332;329	0	33.535	By MS/MS	By MS/MS	By matching	By MS/MS	By MS/MS	By MS/MS	By MS/MS
120	K4BD63;K4BD64;K4B402	K4BD63	29;2;1	29;2;1	25;1;0	>tr|K4BD63|K4BD63_SOLLC Uncharacterized protein OS=Solanum lycopersicum PE=4 SV=1	3	29	29	25	20	28	26	29	28	28	26	24	20	28	26	29	28	28	26	24	17	24	22	25	24	24	22	20	52.3	52.3	48.7	79.966	754	754;753;772	0	163.12	By MS/MS	By MS/MS	By MS/MS	By MS/MS	By MS/MS	By MS/MS	By MS/MS
121	K4BDB7	K4BDB7	5	5	5	>tr|K4BDB7|K4BDB7_SOLLC Uncharacterized protein OS=Solanum lycopersicum PE=4 SV=1	1	5	5	5	2	4	2	5	4	3	2	3	2	4	2	5	4	3	2	3	2	4	2	5	4	3	2	3	18.7	18.7	18.7	46.712	427	427	0	47.324	By MS/MS	By MS/MS	By MS/MS	By MS/MS	By MS/MS	By MS/MS	By MS/MS
122	K4BDC7;K4B315	K4BDC7	4;1	4;1	4;1	>tr|K4BDC7|K4BDC7_SOLLC Uncharacterized protein OS=Solanum lycopersicum PE=4 SV=1	2	4	4	4	4	4	4	4	4	4	4	4	4	4	4	4	4	4	4	4	4	4	4	4	4	4	4	4	7	7	7	45.449	412	412;409	0	44.328	By MS/MS	By MS/MS	By MS/MS	By MS/MS	By MS/MS	By MS/MS	By MS/MS
123	K4BDK1	K4BDK1	2	2	2	>tr|K4BDK1|K4BDK1_SOLLC Uncharacterized protein OS=Solanum lycopersicum PE=4 SV=1	1	2	2	2	2	1	2	2	2	2	2	2	2	1	2	2	2	2	2	2	2	1	2	2	2	2	2	2	15.9	15.9	15.9	18.184	170	170	0	33.396	By matching	By MS/MS	By matching	By MS/MS	By matching	By matching	By MS/MS
124	K4BDL3	K4BDL3	12	12	12	>tr|K4BDL3|K4BDL3_SOLLC Peroxidase OS=Solanum lycopersicum PE=3 SV=1	1	12	12	12	11	11	10	10	12	12	11	12	11	11	10	10	12	12	11	12	11	11	10	10	12	12	11	12	46.2	46.2	46.2	35.385	325	325	0	87.401	By MS/MS	By MS/MS	By MS/MS	By MS/MS	By MS/MS	By MS/MS	By MS/MS
125	K4BE44	K4BE44	2	2	2	>tr|K4BE44|K4BE44_SOLLC Uncharacterized protein OS=Solanum lycopersicum PE=3 SV=1	1	2	2	2	2	2	2	2	2	2	2	1	2	2	2	2	2	2	2	1	2	2	2	2	2	2	2	1	4.9	4.9	4.9	38.626	346	346	0	4.1958	By matching	By matching	By MS/MS	By matching	By matching	By matching	By MS/MS
126	K4BE45	K4BE45	8	8	8	>tr|K4BE45|K4BE45_SOLLC Uncharacterized protein OS=Solanum lycopersicum PE=4 SV=1	1	8	8	8	7	8	8	7	7	7	8	7	7	8	8	7	7	7	8	7	7	8	8	7	7	7	8	7	21.6	21.6	21.6	40.861	357	357	0	29.147	By MS/MS	By MS/MS	By MS/MS	By MS/MS	By MS/MS	By MS/MS	By MS/MS
127	K4BEV1	K4BEV1	17	17	17	>tr|K4BEV1|K4BEV1_SOLLC Alpha-galactosidase OS=Solanum lycopersicum PE=3 SV=1	1	17	17	17	14	17	14	15	16	16	16	13	14	17	14	15	16	16	16	13	14	17	14	15	16	16	16	13	46.2	46.2	46.2	44.955	409	409	0	150.88	By MS/MS	By MS/MS	By MS/MS	By MS/MS	By MS/MS	By MS/MS	By MS/MS
128	K4BEX5;K4BEX6	K4BEX5;K4BEX6	3;2	3;2	3;2	>tr|K4BEX5|K4BEX5_SOLLC Uncharacterized protein OS=Solanum lycopersicum PE=4 SV=1;>tr|K4BEX6|K4BEX6_SOLLC Uncharacterized protein OS=Solanum lycopersicum PE=4 SV=1	2	3	3	3	1	3	2	3	2	2	3	0	1	3	2	3	2	2	3	0	1	3	2	3	2	2	3	0	17.4	17.4	17.4	22.653	207	207;207	0	15.583	By matching	By MS/MS	By MS/MS	By MS/MS	By matching	By MS/MS	By MS/MS
129	K4BF11;K4CG58	K4BF11	6;1	6;1	6;1	>tr|K4BF11|K4BF11_SOLLC Peroxidase OS=Solanum lycopersicum PE=3 SV=1	2	6	6	6	5	5	4	3	4	3	4	2	5	5	4	3	4	3	4	2	5	5	4	3	4	3	4	2	27.5	27.5	27.5	34.377	320	320;319	0	27.878	By MS/MS	By MS/MS	By MS/MS	By matching	By MS/MS	By MS/MS	By MS/MS
130	K4BF33	K4BF33	2	2	2	>tr|K4BF33|K4BF33_SOLLC Uncharacterized protein OS=Solanum lycopersicum PE=4 SV=1	1	2	2	2	1	1	1	2	1	1	2	2	1	1	1	2	1	1	2	2	1	1	1	2	1	1	2	2	6.3	6.3	6.3	45.152	397	397	0	5.1902	By matching	By matching	By MS/MS	By MS/MS	By matching	By matching	By MS/MS
131	K4BFF2;K4CX68;K4B9N7	K4BFF2	5;2;1	5;2;1	5;2;1	>tr|K4BFF2|K4BFF2_SOLLC Xyloglucan endotransglucosylase/hydrolase OS=Solanum lycopersicum PE=3 SV=1	3	5	5	5	4	5	5	5	5	5	5	3	4	5	5	5	5	5	5	3	4	5	5	5	5	5	5	3	19	19	19	34.512	295	295;288;298	0	15.85	By MS/MS	By MS/MS	By MS/MS	By MS/MS	By MS/MS	By MS/MS	By MS/MS
132	K4BFN4	K4BFN4	8	8	8	>tr|K4BFN4|K4BFN4_SOLLC Uncharacterized protein OS=Solanum lycopersicum PE=4 SV=1	1	8	8	8	3	8	7	8	8	8	8	6	3	8	7	8	8	8	8	6	3	8	7	8	8	8	8	6	22.2	22.2	22.2	53.517	477	477	0	29.741	By matching	By MS/MS	By MS/MS	By MS/MS	By MS/MS	By MS/MS	By MS/MS
133	K4BG30	K4BG30	13	13	11	>tr|K4BG30|K4BG30_SOLLC Peroxidase OS=Solanum lycopersicum PE=3 SV=1	1	13	13	11	11	13	12	11	12	13	13	13	11	13	12	11	12	13	13	13	9	11	10	9	10	11	11	11	44.4	44.4	40.2	35.943	331	331	0	208.89	By MS/MS	By MS/MS	By MS/MS	By MS/MS	By MS/MS	By MS/MS	By MS/MS
134	K4BG34	K4BG34	17	13	13	>tr|K4BG34|K4BG34_SOLLC Uncharacterized protein OS=Solanum lycopersicum PE=4 SV=1	1	17	13	13	8	16	16	16	16	15	17	11	5	12	12	12	12	11	13	7	5	12	12	12	12	11	13	7	33.1	28	28	81.566	771	771	0	96.055	By matching	By MS/MS	By MS/MS	By MS/MS	By MS/MS	By MS/MS	By MS/MS
136	K4BHA1	K4BHA1	3	3	3	>tr|K4BHA1|K4BHA1_SOLLC Uncharacterized protein OS=Solanum lycopersicum PE=4 SV=1	1	3	3	3	2	3	2	3	2	3	3	1	2	3	2	3	2	3	3	1	2	3	2	3	2	3	3	1	2.7	2.7	2.7	177.09	1621	1621	0	9.1137	By matching	By MS/MS	By MS/MS	By MS/MS	By matching	By MS/MS	By matching
137	K4BHP0	K4BHP0	2	1	1	>tr|K4BHP0|K4BHP0_SOLLC Pectinesterase OS=Solanum lycopersicum PE=4 SV=1	1	2	1	1	2	2	2	2	2	2	1	1	1	1	1	1	1	1	1	1	1	1	1	1	1	1	1	1	4.5	3.1	3.1	60.501	553	553	0	6.0922	By matching	By MS/MS	By matching	By MS/MS	By MS/MS	By MS/MS	By MS/MS
139	K4C095;K4BHW5;K4CYX2	K4C095;K4BHW5;K4CYX2	3;3;2	3;3;2	3;3;2	>tr|K4C095|K4C095_SOLLC Uncharacterized protein OS=Solanum lycopersicum PE=4 SV=1;>tr|K4BHW5|K4BHW5_SOLLC Uncharacterized protein OS=Solanum lycopersicum PE=4 SV=1;>tr|K4CYX2|K4CYX2_SOLLC Uncharacterized protein OS=Solanum lycopersicum PE=4 SV=1	3	3	3	3	2	3	3	3	3	3	3	3	2	3	3	3	3	3	3	3	2	3	3	3	3	3	3	3	25.9	25.9	25.9	11.643	112	112;125;40	0	3.192	By matching	By matching	By MS/MS	By MS/MS	By matching	By matching	By matching
140	K4BI68	K4BI68	4	3	1	>tr|K4BI68|K4BI68_SOLLC Uncharacterized protein OS=Solanum lycopersicum PE=3 SV=1	1	4	3	1	4	4	4	4	4	4	3	3	3	3	3	3	3	3	2	2	1	1	1	1	1	1	1	0	7.5	4.9	1.9	73.456	667	667	0	4.5328	By MS/MS	By MS/MS	By MS/MS	By MS/MS	By MS/MS	By matching	By MS/MS
141	K4BIG5	K4BIG5	7	7	7	>tr|K4BIG5|K4BIG5_SOLLC Uncharacterized protein OS=Solanum lycopersicum PE=4 SV=1	1	7	7	7	6	7	7	7	7	7	7	7	6	7	7	7	7	7	7	7	6	7	7	7	7	7	7	7	15	15	15	65.977	592	592	0	24.148	By MS/MS	By MS/MS	By MS/MS	By MS/MS	By MS/MS	By MS/MS	By MS/MS
143	K4BII5;Q6RHY0;K4BII8;K4BII9;K4DHN4;K4CWS8;K4DCI9;Q43528;K4DD58	K4BII5;Q6RHY0;K4BII8;K4BII9	10;9;9;6;1;1;1;1;1	10;9;9;6;1;1;1;1;1	9;8;8;5;0;0;1;1;1	>tr|K4BII5|K4BII5_SOLLC Xyloglucan endotransglucosylase/hydrolase OS=Solanum lycopersicum PE=3 SV=1;>tr|Q6RHY0|Q6RHY0_SOLLC Xyloglucan endotransglucosylase/hydrolase OS=Solanum lycopersicum GN=XTH3 PE=2 SV=1;>tr|K4BII8|K4BII8_SOLLC Xyloglucan endotransgluc	9	10	10	9	8	9	10	9	10	9	10	9	8	9	10	9	10	9	10	9	7	8	9	8	9	8	9	8	31.8	31.8	26.9	32.067	286	286;287;287;286;261;276;277;287;289	0	60.143	By MS/MS	By MS/MS	By MS/MS	By MS/MS	By MS/MS	By MS/MS	By MS/MS
144	K4BIL3	K4BIL3	2	2	2	>tr|K4BIL3|K4BIL3_SOLLC Uncharacterized protein OS=Solanum lycopersicum PE=4 SV=1	1	2	2	2	2	2	1	2	2	2	2	2	2	2	1	2	2	2	2	2	2	2	1	2	2	2	2	2	11.2	11.2	11.2	19.632	179	179	0.0024331	1.1361	By MS/MS	By matching	By matching	By matching	By matching	By matching	By matching
146	K4BJU1	K4BJU1	2	2	2	>tr|K4BJU1|K4BJU1_SOLLC Uncharacterized protein OS=Solanum lycopersicum PE=4 SV=1	1	2	2	2	1	1	2	2	2	2	2	0	1	1	2	2	2	2	2	0	1	1	2	2	2	2	2	0	7.7	7.7	7.7	24.5	221	221	0	4.8738	By matching	By matching	By MS/MS	By MS/MS	By MS/MS	By MS/MS	By MS/MS
147	K4BJY1	K4BJY1	3	3	3	>tr|K4BJY1|K4BJY1_SOLLC Uncharacterized protein OS=Solanum lycopersicum PE=3 SV=1	1	3	3	3	2	3	3	2	2	2	3	2	2	3	3	2	2	2	3	2	2	3	3	2	2	2	3	2	8.3	8.3	8.3	52.813	482	482	0	33.733	By matching	By matching	By MS/MS	By MS/MS	By matching	By matching	By matching
148	K4BK30	K4BK30	2	2	2	>tr|K4BK30|K4BK30_SOLLC Uncharacterized protein OS=Solanum lycopersicum PE=4 SV=1	1	2	2	2	0	2	1	2	1	2	1	2	0	2	1	2	1	2	1	2	0	2	1	2	1	2	1	2	2.9	2.9	2.9	71.591	659	659	0	2.6615	By matching	By MS/MS	By matching	By MS/MS	By MS/MS	By MS/MS	By matching
150	K4BKF6	K4BKF6	4	4	4	>tr|K4BKF6|K4BKF6_SOLLC Aldose 1-epimerase OS=Solanum lycopersicum PE=3 SV=1	1	4	4	4	4	4	4	3	4	4	4	4	4	4	4	3	4	4	4	4	4	4	4	3	4	4	4	4	11	11	11	39.399	355	355	0	19.448	By MS/MS	By MS/MS	By MS/MS	By matching	By MS/MS	By MS/MS	By MS/MS
152	K4BL06	K4BL06	3	3	3	>tr|K4BL06|K4BL06_SOLLC Uncharacterized protein OS=Solanum lycopersicum PE=3 SV=1	1	3	3	3	0	1	1	3	3	3	3	1	0	1	1	3	3	3	3	1	0	1	1	3	3	3	3	1	11.7	11.7	11.7	48.976	454	454	0	14.68	By matching	By MS/MS	By matching	By MS/MS	By MS/MS	By MS/MS	By MS/MS
154	K4BMB8	K4BMB8	10	10	10	>tr|K4BMB8|K4BMB8_SOLLC Uncharacterized protein OS=Solanum lycopersicum PE=3 SV=1	1	10	10	10	9	10	8	9	10	8	7	9	9	10	8	9	10	8	7	9	9	10	8	9	10	8	7	9	22.5	22.5	22.5	57.649	534	534	0	65.21	By MS/MS	By MS/MS	By MS/MS	By MS/MS	By MS/MS	By MS/MS	By MS/MS
155	K4BMQ9	K4BMQ9	2	2	2	>tr|K4BMQ9|K4BMQ9_SOLLC Uncharacterized protein OS=Solanum lycopersicum PE=4 SV=1	1	2	2	2	1	0	0	1	1	0	0	0	1	0	0	1	1	0	0	0	1	0	0	1	1	0	0	0	13.7	13.7	13.7	29.002	255	255	0	10.374	By MS/MS	By matching	By matching	By matching	By MS/MS	By matching	By matching
156	K4BMW0	K4BMW0	2	2	2	>tr|K4BMW0|K4BMW0_SOLLC Uncharacterized protein OS=Solanum lycopersicum PE=4 SV=1	1	2	2	2	1	2	2	2	2	2	1	2	1	2	2	2	2	2	1	2	1	2	2	2	2	2	1	2	2.8	2.8	2.8	97.317	886	886	0	39.095	By MS/MS	By MS/MS	By MS/MS	By MS/MS	By MS/MS	By MS/MS	By MS/MS
158	K4C757;K4BN88	K4C757;K4BN88	2;2	2;2	2;2	>tr|K4C757|K4C757_SOLLC alpha-1,2-Mannosidase OS=Solanum lycopersicum PE=3 SV=1;>tr|K4BN88|K4BN88_SOLLC alpha-1,2-Mannosidase OS=Solanum lycopersicum PE=3 SV=1	2	2	2	2	2	2	2	2	2	2	2	2	2	2	2	2	2	2	2	2	2	2	2	2	2	2	2	2	4.4	4.4	4.4	64.52	565	565;579	0	2.4134	By matching	By matching	By matching	By matching	By matching	By matching	By MS/MS
159	K4BNA9	K4BNA9	3	3	3	>tr|K4BNA9|K4BNA9_SOLLC Uncharacterized protein OS=Solanum lycopersicum PE=4 SV=1	1	3	3	3	2	3	3	3	3	3	3	2	2	3	3	3	3	3	3	2	2	3	3	3	3	3	3	2	5	5	5	63.927	596	596	0.002331	0.97887	By MS/MS	By matching	By matching	By MS/MS	By matching	By matching	By MS/MS
160	K4DEV1;K4BNC2;K4BXJ9	K4DEV1;K4BNC2;K4BXJ9	2;2;1	2;2;1	2;2;1	>tr|K4DEV1|K4DEV1_SOLLC Uncharacterized protein OS=Solanum lycopersicum PE=4 SV=1;>tr|K4BNC2|K4BNC2_SOLLC 6-phosphogluconate dehydrogenase, decarboxylating OS=Solanum lycopersicum PE=3 SV=1;>tr|K4BXJ9|K4BXJ9_SOLLC Uncharacterized protein OS=Solanum lycoper	3	2	2	2	2	2	2	2	2	1	2	0	2	2	2	2	2	1	2	0	2	2	2	2	2	1	2	0	8.8	8.8	8.8	23.481	215	215;471;271	0.0088889	0.81156	By MS/MS	By MS/MS	By matching	By matching	By matching	By matching	By matching
164	K4BNM2	K4BNM2	11	11	6	>tr|K4BNM2|K4BNM2_SOLLC Uncharacterized protein OS=Solanum lycopersicum PE=3 SV=1	1	11	11	6	9	9	8	10	10	9	9	9	9	9	8	10	10	9	9	9	5	4	3	5	5	4	4	4	21.9	21.9	13.2	67.547	599	599	0	45.486	By MS/MS	By MS/MS	By MS/MS	By MS/MS	By MS/MS	By MS/MS	By MS/MS
165	K4BNM3	K4BNM3	5	3	3	>tr|K4BNM3|K4BNM3_SOLLC Uncharacterized protein OS=Solanum lycopersicum PE=3 SV=1	1	5	3	3	3	5	4	5	4	4	4	3	1	3	2	3	2	2	2	1	1	3	2	3	2	2	2	1	27.9	19.3	19.3	30.295	269	269	0	6.3062	By MS/MS	By MS/MS	By MS/MS	By MS/MS	By MS/MS	By MS/MS	By matching
167	K4BNU8	K4BNU8	2	2	2	>tr|K4BNU8|K4BNU8_SOLLC Uncharacterized protein OS=Solanum lycopersicum PE=3 SV=1	1	2	2	2	2	2	2	2	2	2	2	2	2	2	2	2	2	2	2	2	2	2	2	2	2	2	2	2	5.9	5.9	5.9	54.638	505	505	0	1.4325	By matching	By matching	By MS/MS	By matching	By matching	By MS/MS	By matching
168	K4BNY4	K4BNY4	2	2	2	>tr|K4BNY4|K4BNY4_SOLLC 4-hydroxy-4-methyl-2-oxoglutarate aldolase OS=Solanum lycopersicum PE=3 SV=1	1	2	2	2	2	2	1	2	2	2	1	1	2	2	1	2	2	2	1	1	2	2	1	2	2	2	1	1	8	8	8	27.781	251	251	0	1.6143	By MS/MS	By matching	By matching	By MS/MS	By MS/MS	By matching	By matching
169	K4BP29	K4BP29	9	9	7	>tr|K4BP29|K4BP29_SOLLC Alpha-galactosidase OS=Solanum lycopersicum PE=3 SV=1	1	9	9	7	8	9	8	6	7	7	8	6	8	9	8	6	7	7	8	6	6	7	6	4	5	5	6	4	25.8	25.8	21.3	46.965	418	418	0	42.396	By MS/MS	By MS/MS	By MS/MS	By MS/MS	By MS/MS	By MS/MS	By MS/MS
170	K4BPB8	K4BPB8	7	5	5	>tr|K4BPB8|K4BPB8_SOLLC Uncharacterized protein OS=Solanum lycopersicum PE=3 SV=1	1	7	5	5	5	6	5	5	5	6	5	6	4	4	4	3	3	4	4	5	4	4	4	3	3	4	4	5	9.9	6.9	6.9	72.781	649	649	0	10.466	By MS/MS	By MS/MS	By matching	By MS/MS	By MS/MS	By MS/MS	By MS/MS
171	K4BPJ4;K4D9M3;K4CQ71;K4AWS1;K4CV89;K4C2D7;K4DHW9;K4D426	K4BPJ4;K4D9M3;K4CQ71;K4AWS1;K4CV89;K4C2D7;K4DHW9;K4D426	2;2;1;1;1;1;1;1	2;2;1;1;1;1;1;1	2;2;1;1;1;1;1;1	>tr|K4BPJ4|K4BPJ4_SOLLC Uncharacterized protein OS=Solanum lycopersicum PE=4 SV=1;>tr|K4D9M3|K4D9M3_SOLLC Uncharacterized protein OS=Solanum lycopersicum PE=4 SV=1;>tr|K4CQ71|K4CQ71_SOLLC Uncharacterized protein OS=Solanum lycopersicum PE=4 SV=1;>tr|K4AWS1	8	2	2	2	2	1	2	1	1	1	2	0	2	1	2	1	1	1	2	0	2	1	2	1	1	1	2	0	6.4	6.4	6.4	38.564	343	343;346;113;163;224;343;394;416	0	2.1479	By MS/MS	By matching	By MS/MS	By matching	By matching	By matching	By MS/MS
172	K4BPK4	K4BPK4	4	4	2	>tr|K4BPK4|K4BPK4_SOLLC Uncharacterized protein OS=Solanum lycopersicum PE=3 SV=1	1	4	4	2	3	4	2	2	2	2	2	2	3	4	2	2	2	2	2	2	2	2	2	2	2	2	2	2	18.9	18.9	10.4	27.504	259	259	0	9.7767	By MS/MS	By MS/MS	By MS/MS	By MS/MS	By MS/MS	By MS/MS	By MS/MS
174	K4BQ22	K4BQ22	4	4	4	>tr|K4BQ22|K4BQ22_SOLLC Uncharacterized protein OS=Solanum lycopersicum PE=3 SV=1	1	4	4	4	2	3	3	2	3	4	3	3	2	3	3	2	3	4	3	3	2	3	3	2	3	4	3	3	12.2	12.2	12.2	53.911	493	493	0	3.2865	By MS/MS	By matching	By MS/MS	By matching	By MS/MS	By MS/MS	By MS/MS
175	K4BQ58	K4BQ58	10	10	8	>tr|K4BQ58|K4BQ58_SOLLC Uncharacterized protein OS=Solanum lycopersicum PE=4 SV=1	1	10	10	8	7	9	7	9	8	8	8	7	7	9	7	9	8	8	8	7	6	7	5	8	7	7	7	5	20.2	20.2	16.2	68.707	625	625	0	12.967	By MS/MS	By MS/MS	By MS/MS	By MS/MS	By MS/MS	By MS/MS	By matching
176	K4BQ85;K4D2I1;K4D2Q1	K4BQ85;K4D2I1	4;2;1	4;2;1	4;2;1	>tr|K4BQ85|K4BQ85_SOLLC Uncharacterized protein OS=Solanum lycopersicum PE=4 SV=1;>tr|K4D2I1|K4D2I1_SOLLC Uncharacterized protein OS=Solanum lycopersicum PE=4 SV=1	3	4	4	4	3	4	3	3	3	3	3	3	3	4	3	3	3	3	3	3	3	4	3	3	3	3	3	3	5	5	5	104.01	948	948;875;945	0	2.9617	By matching	By MS/MS	By MS/MS	By MS/MS	By MS/MS	By MS/MS	By MS/MS
177	K4BQE7	K4BQE7	6	5	5	>tr|K4BQE7|K4BQE7_SOLLC Uncharacterized protein OS=Solanum lycopersicum PE=3 SV=1	1	6	5	5	5	6	6	6	6	6	6	6	4	5	5	5	5	5	5	5	4	5	5	5	5	5	5	5	24.9	20.3	20.3	38.361	345	345	0	45.266	By MS/MS	By MS/MS	By MS/MS	By MS/MS	By MS/MS	By MS/MS	By MS/MS
178	K4BRG8	K4BRG8	3	3	3	>tr|K4BRG8|K4BRG8_SOLLC Uncharacterized protein OS=Solanum lycopersicum PE=3 SV=1	1	3	3	3	2	3	3	3	3	3	3	2	2	3	3	3	3	3	3	2	2	3	3	3	3	3	3	2	5.8	5.8	5.8	63.451	583	583	0	17.637	By MS/MS	By MS/MS	By MS/MS	By MS/MS	By MS/MS	By MS/MS	By MS/MS
182	K4BTH7;K4BTH6;REV__W9JWH8	K4BTH7	10;4;1	10;4;1	10;4;1	>tr|K4BTH7|K4BTH7_SOLLC Peroxidase OS=Solanum lycopersicum PE=3 SV=1	3	10	10	10	8	9	7	10	8	9	9	8	8	9	7	10	8	9	9	8	8	9	7	10	8	9	9	8	30.8	30.8	30.8	38.892	351	351;348;549	0	45.827	By MS/MS	By MS/MS	By MS/MS	By MS/MS	By MS/MS	By MS/MS	By MS/MS
183	K4BTI7	K4BTI7	5	5	5	>tr|K4BTI7|K4BTI7_SOLLC Uncharacterized protein OS=Solanum lycopersicum PE=3 SV=1	1	5	5	5	4	5	3	5	5	5	4	3	4	5	3	5	5	5	4	3	4	5	3	5	5	5	4	3	23.2	23.2	23.2	30.012	276	276	0	113.91	By MS/MS	By MS/MS	By MS/MS	By MS/MS	By MS/MS	By MS/MS	By MS/MS
187	K4BU57	K4BU57	3	3	3	>tr|K4BU57|K4BU57_SOLLC Uncharacterized protein OS=Solanum lycopersicum PE=3 SV=1	1	3	3	3	2	3	3	3	3	3	3	3	2	3	3	3	3	3	3	3	2	3	3	3	3	3	3	3	7.1	7.1	7.1	46.103	435	435	0	4.3872	By MS/MS	By MS/MS	By matching	By matching	By matching	By MS/MS	By MS/MS
188	K4BUA1	K4BUA1	4	4	4	>tr|K4BUA1|K4BUA1_SOLLC Uncharacterized protein OS=Solanum lycopersicum PE=4 SV=1	1	4	4	4	3	3	4	4	4	3	3	3	3	3	4	4	4	3	3	3	3	3	4	4	4	3	3	3	7.8	7.8	7.8	74.184	650	650	0	7.931	By MS/MS	By MS/MS	By matching	By MS/MS	By matching	By matching	By matching
190	K4BUA4;K4DGM6;K4BUA3	K4BUA4	4;1;1	4;1;1	4;1;1	>tr|K4BUA4|K4BUA4_SOLLC Uncharacterized protein OS=Solanum lycopersicum PE=4 SV=1	3	4	4	4	2	3	2	4	4	3	2	3	2	3	2	4	4	3	2	3	2	3	2	4	4	3	2	3	10.3	10.3	10.3	75.745	670	670;632;638	0	27.665	By MS/MS	By MS/MS	By MS/MS	By MS/MS	By MS/MS	By MS/MS	By matching
191	K4BUF6;K4DGP2	K4BUF6	16;2	16;2	16;2	>tr|K4BUF6|K4BUF6_SOLLC Uncharacterized protein OS=Solanum lycopersicum PE=4 SV=1	2	16	16	16	15	15	15	15	15	15	15	12	15	15	15	15	15	15	15	12	15	15	15	15	15	15	15	12	15	15	15	126.34	1144	1144;921	0	156.21	By MS/MS	By MS/MS	By MS/MS	By MS/MS	By MS/MS	By MS/MS	By MS/MS
192	K4BUK4	K4BUK4	2	2	2	>tr|K4BUK4|K4BUK4_SOLLC Uncharacterized protein OS=Solanum lycopersicum PE=3 SV=1	1	2	2	2	2	2	2	0	1	1	2	1	2	2	2	0	1	1	2	1	2	2	2	0	1	1	2	1	7	7	7	54.837	486	486	0	4.5314	By matching	By MS/MS	By MS/MS	By matching	By matching	By matching	By MS/MS
194	K4BUP8	K4BUP8	23	23	23	>tr|K4BUP8|K4BUP8_SOLLC Uncharacterized protein OS=Solanum lycopersicum PE=4 SV=1	1	23	23	23	20	22	20	21	20	21	21	20	20	22	20	21	20	21	21	20	20	22	20	21	20	21	21	20	44.9	44.9	44.9	81.353	766	766	0	224.33	By MS/MS	By MS/MS	By MS/MS	By MS/MS	By MS/MS	By MS/MS	By MS/MS
196	K4BUV9;K4D3Y8;K4D3Y7	K4BUV9	16;1;1	15;0;0	15;0;0	>tr|K4BUV9|K4BUV9_SOLLC Uncharacterized protein OS=Solanum lycopersicum PE=4 SV=1	3	16	15	15	14	16	14	14	16	15	15	15	13	15	13	14	15	15	14	15	13	15	13	14	15	15	14	15	31.6	30.6	30.6	81.101	751	751;721;729	0	175.76	By MS/MS	By MS/MS	By MS/MS	By MS/MS	By MS/MS	By MS/MS	By MS/MS
197	K4BV68	K4BV68	3	3	3	>tr|K4BV68|K4BV68_SOLLC Uncharacterized protein OS=Solanum lycopersicum PE=4 SV=1	1	3	3	3	3	3	3	3	3	3	3	2	3	3	3	3	3	3	3	2	3	3	3	3	3	3	3	2	17.8	17.8	17.8	25.388	247	247	0	27.081	By matching	By MS/MS	By MS/MS	By MS/MS	By MS/MS	By MS/MS	By MS/MS
198	K4BVA5	K4BVA5	18	18	17	>tr|K4BVA5|K4BVA5_SOLLC Uncharacterized protein OS=Solanum lycopersicum PE=3 SV=1	1	18	18	17	16	18	18	17	18	18	17	17	16	18	18	17	18	18	17	17	15	17	17	16	17	17	16	16	49.4	49.4	47.4	47.196	441	441	0	116.66	By MS/MS	By MS/MS	By MS/MS	By MS/MS	By MS/MS	By MS/MS	By MS/MS
200	K4BVG7	K4BVG7	3	3	3	>tr|K4BVG7|K4BVG7_SOLLC Uncharacterized protein OS=Solanum lycopersicum PE=3 SV=1	1	3	3	3	2	2	2	3	3	3	3	2	2	2	2	3	3	3	3	2	2	2	2	3	3	3	3	2	5.7	5.7	5.7	95.753	845	845	0	24.951	By MS/MS	By MS/MS	By matching	By MS/MS	By matching	By MS/MS	By MS/MS
201	K4BVN4	K4BVN4	6	6	6	>tr|K4BVN4|K4BVN4_SOLLC Uncharacterized protein OS=Solanum lycopersicum PE=4 SV=1	1	6	6	6	6	5	6	6	4	5	5	4	6	5	6	6	4	5	5	4	6	5	6	6	4	5	5	4	16.7	16.7	16.7	35.383	335	335	0	35.175	By MS/MS	By MS/MS	By MS/MS	By MS/MS	By MS/MS	By MS/MS	By MS/MS
202	K4BVR0	K4BVR0	32	32	32	>tr|K4BVR0|K4BVR0_SOLLC Uncharacterized protein OS=Solanum lycopersicum PE=3 SV=1	1	32	32	32	26	32	31	30	31	31	29	30	26	32	31	30	31	31	29	30	26	32	31	30	31	31	29	30	37.7	37.7	37.7	83.224	783	783	0	323.31	By MS/MS	By MS/MS	By MS/MS	By MS/MS	By MS/MS	By MS/MS	By MS/MS
203	K4BVU1;K4B459;K4CFC2;K4DH19	K4BVU1	17;1;1;1	17;1;1;1	16;1;1;1	>tr|K4BVU1|K4BVU1_SOLLC Uncharacterized protein OS=Solanum lycopersicum PE=4 SV=1	4	17	17	16	16	16	14	14	16	15	15	15	16	16	14	14	16	15	15	15	15	15	13	13	15	14	14	14	36.9	36.9	35	60.052	540	540;536;537;543	0	168.32	By MS/MS	By MS/MS	By MS/MS	By MS/MS	By MS/MS	By MS/MS	By MS/MS
204	K4BVZ8	K4BVZ8	6	6	6	>tr|K4BVZ8|K4BVZ8_SOLLC Uncharacterized protein OS=Solanum lycopersicum PE=3 SV=1	1	6	6	6	6	5	6	5	6	5	6	6	6	5	6	5	6	5	6	6	6	5	6	5	6	5	6	6	23	23	23	34.37	305	305	0	33.665	By MS/MS	By MS/MS	By MS/MS	By MS/MS	By MS/MS	By MS/MS	By MS/MS
205	K4BX34	K4BX34	5	5	5	>tr|K4BX34|K4BX34_SOLLC Fructose-bisphosphate aldolase OS=Solanum lycopersicum PE=3 SV=1	1	5	5	5	4	5	4	5	5	5	5	4	4	5	4	5	5	5	5	4	4	5	4	5	5	5	5	4	19	19	19	43.066	395	395	0	66.151	By MS/MS	By MS/MS	By MS/MS	By MS/MS	By MS/MS	By MS/MS	By MS/MS
207	K4BXC1	K4BXC1	8	4	2	>tr|K4BXC1|K4BXC1_SOLLC Uncharacterized protein OS=Solanum lycopersicum PE=3 SV=1	1	8	4	2	6	8	8	8	8	8	8	8	3	4	4	4	4	4	4	4	1	2	2	2	2	2	2	2	9.6	4.7	2.3	104.63	928	928	0	6.3078	By MS/MS	By MS/MS	By MS/MS	By MS/MS	By matching	By MS/MS	By MS/MS
208	K4BXU9	K4BXU9	7	7	7	>tr|K4BXU9|K4BXU9_SOLLC Purple acid phosphatase OS=Solanum lycopersicum PE=3 SV=1	1	7	7	7	5	7	5	4	7	7	6	5	5	7	5	4	7	7	6	5	5	7	5	4	7	7	6	5	16	16	16	68.23	606	606	0	20.939	By MS/MS	By MS/MS	By MS/MS	By MS/MS	By MS/MS	By MS/MS	By MS/MS
209	K4BY93	K4BY93	11	11	11	>tr|K4BY93|K4BY93_SOLLC Alpha-galactosidase OS=Solanum lycopersicum PE=3 SV=1	1	11	11	11	9	11	9	10	10	10	9	7	9	11	9	10	10	10	9	7	9	11	9	10	10	10	9	7	20.9	20.9	20.9	70.992	632	632	0	30.327	By MS/MS	By MS/MS	By MS/MS	By MS/MS	By MS/MS	By MS/MS	By MS/MS
210	K4BYG6;K4C8R4;K4BJW4;K4BWA9	K4BYG6;K4C8R4;K4BJW4	6;3;3;1	6;3;3;1	6;3;3;1	>tr|K4BYG6|K4BYG6_SOLLC Glyceraldehyde-3-phosphate dehydrogenase OS=Solanum lycopersicum PE=3 SV=1;>tr|K4C8R4|K4C8R4_SOLLC Glyceraldehyde-3-phosphate dehydrogenase OS=Solanum lycopersicum PE=3 SV=1;>tr|K4BJW4|K4BJW4_SOLLC Glyceraldehyde-3-phosphate dehydro	4	6	6	6	5	4	5	6	6	5	5	4	5	4	5	6	6	5	5	4	5	4	5	6	6	5	5	4	23.7	23.7	23.7	36.674	338	338;337;337;337	0	16.786	By matching	By MS/MS	By MS/MS	By MS/MS	By matching	By MS/MS	By MS/MS
211	K4BYN1	K4BYN1	3	3	3	>tr|K4BYN1|K4BYN1_SOLLC Uncharacterized protein OS=Solanum lycopersicum PE=3 SV=1	1	3	3	3	1	2	1	3	3	3	2	2	1	2	1	3	3	3	2	2	1	2	1	3	3	3	2	2	6.3	6.3	6.3	77.579	717	717	0	8.249	By matching	By MS/MS	By matching	By MS/MS	By MS/MS	By MS/MS	By MS/MS
213	K4BZT8;K4CCI7	K4BZT8	10;1	10;1	9;0	>tr|K4BZT8|K4BZT8_SOLLC Uncharacterized protein OS=Solanum lycopersicum PE=3 SV=1	2	10	10	9	4	7	6	8	9	9	7	8	4	7	6	8	9	9	7	8	4	7	6	8	8	9	6	7	24.9	24.9	23	52.712	482	482;509	0	21.647	By MS/MS	By MS/MS	By MS/MS	By MS/MS	By MS/MS	By MS/MS	By MS/MS
214	K4C0T5;K4C0T6	K4C0T5;K4C0T6	3;2	2;1	2;1	>tr|K4C0T5|K4C0T5_SOLLC Peroxidase OS=Solanum lycopersicum PE=3 SV=1;>tr|K4C0T6|K4C0T6_SOLLC Peroxidase OS=Solanum lycopersicum PE=3 SV=1	2	3	2	2	1	3	2	3	3	3	3	2	1	2	1	2	2	2	2	2	1	2	1	2	2	2	2	2	11.9	9.2	9.2	35.833	327	327;327	0	6.2593	By matching	By matching	By matching	By matching	By matching	By matching	By matching
215	K4C0W2	K4C0W2	2	2	2	>tr|K4C0W2|K4C0W2_SOLLC Xyloglucan endotransglucosylase/hydrolase OS=Solanum lycopersicum PE=3 SV=1	1	2	2	2	0	2	1	1	2	1	2	2	0	2	1	1	2	1	2	2	0	2	1	1	2	1	2	2	11.5	11.5	11.5	32.917	288	288	0.0023095	0.96829	By matching	By MS/MS	By matching	By matching	By matching	By matching	By matching
216	K4C131;K4AZN7	K4C131	13;3	13;3	13;3	>tr|K4C131|K4C131_SOLLC Uncharacterized protein OS=Solanum lycopersicum PE=3 SV=1	2	13	13	13	11	12	12	12	12	12	10	10	11	12	12	12	12	12	10	10	11	12	12	12	12	12	10	10	44.9	44.9	44.9	53.395	486	486;407	0	278.27	By MS/MS	By MS/MS	By MS/MS	By MS/MS	By MS/MS	By MS/MS	By MS/MS
217	K4C145;K4AZR5;K4AZR4;K4AZS0	K4C145	10;1;1;1	10;1;1;1	10;1;1;1	>tr|K4C145|K4C145_SOLLC Uncharacterized protein OS=Solanum lycopersicum PE=3 SV=1	4	10	10	10	10	10	10	10	10	10	10	10	10	10	10	10	10	10	10	10	10	10	10	10	10	10	10	10	36.3	36.3	36.3	31.258	292	292;298;298;302	0	172.75	By MS/MS	By MS/MS	By MS/MS	By MS/MS	By MS/MS	By MS/MS	By MS/MS
219	K4C1C0	K4C1C0	11	11	7	>tr|K4C1C0|K4C1C0_SOLLC Peroxidase OS=Solanum lycopersicum PE=3 SV=1	1	11	11	7	11	11	10	10	9	11	11	11	11	11	10	10	9	11	11	11	7	7	6	7	6	7	7	7	50.2	50.2	34.1	33.736	317	317	0	108.67	By MS/MS	By MS/MS	By MS/MS	By MS/MS	By MS/MS	By MS/MS	By MS/MS
220	K4C1C1	K4C1C1	2	1	1	>tr|K4C1C1|K4C1C1_SOLLC Peroxidase OS=Solanum lycopersicum PE=3 SV=1	1	2	1	1	1	2	1	1	2	2	1	1	0	1	1	0	1	1	1	0	0	1	1	0	1	1	1	0	33.8	12	12	14.428	133	133	0	12.92	By matching	By MS/MS	By MS/MS	By matching	By MS/MS	By MS/MS	By MS/MS
221	K4C1Q9	K4C1Q9	15	14	11	>tr|K4C1Q9|K4C1Q9_SOLLC Peroxidase OS=Solanum lycopersicum PE=3 SV=1	1	15	14	11	15	15	15	14	14	15	15	14	14	14	14	13	13	14	14	13	11	11	11	10	10	11	11	10	49.1	46.3	36.6	34.907	322	322	0	81.502	By MS/MS	By MS/MS	By MS/MS	By MS/MS	By MS/MS	By MS/MS	By MS/MS
222	K4C1S1	K4C1S1	2	2	2	>tr|K4C1S1|K4C1S1_SOLLC Laccase OS=Solanum lycopersicum PE=3 SV=1	1	2	2	2	1	2	1	1	1	1	2	2	1	2	1	1	1	1	2	2	1	2	1	1	1	1	2	2	4.9	4.9	4.9	63.371	574	574	0	4.8719	By MS/MS	By MS/MS	By matching	By matching	By MS/MS	By MS/MS	By MS/MS
223	K4C2E8	K4C2E8	5	5	5	>tr|K4C2E8|K4C2E8_SOLLC Beta-hexosaminidase OS=Solanum lycopersicum PE=3 SV=1	1	5	5	5	4	3	4	5	5	5	4	5	4	3	4	5	5	5	4	5	4	3	4	5	5	5	4	5	10.7	10.7	10.7	62.633	552	552	0	13.922	By MS/MS	By MS/MS	By MS/MS	By MS/MS	By MS/MS	By MS/MS	By MS/MS
224	K4C2F3;K4D7W9;K4CTB3;K4C9R7;K4BYB6;K4BT38	K4C2F3	8;1;1;1;1;1	8;1;1;1;1;1	8;1;1;1;1;1	>tr|K4C2F3|K4C2F3_SOLLC Uncharacterized protein OS=Solanum lycopersicum PE=4 SV=1	6	8	8	8	3	8	8	6	5	6	8	3	3	8	8	6	5	6	8	3	3	8	8	6	5	6	8	3	41	41	41	23.554	210	210;95;103;110;141;167	0	27.526	By matching	By MS/MS	By MS/MS	By MS/MS	By MS/MS	By MS/MS	By MS/MS
226	K4C3A0	K4C3A0	10	10	10	>tr|K4C3A0|K4C3A0_SOLLC Uncharacterized protein OS=Solanum lycopersicum PE=4 SV=1	1	10	10	10	9	9	9	8	10	9	10	6	9	9	9	8	10	9	10	6	9	9	9	8	10	9	10	6	28.5	28.5	28.5	48.924	428	428	0	29.463	By MS/MS	By MS/MS	By MS/MS	By matching	By MS/MS	By MS/MS	By MS/MS
227	K4C3T2;K4C3T4	K4C3T2;K4C3T4	4;2	4;2	4;2	>tr|K4C3T2|K4C3T2_SOLLC Uncharacterized protein OS=Solanum lycopersicum PE=3 SV=1;>tr|K4C3T4|K4C3T4_SOLLC Uncharacterized protein OS=Solanum lycopersicum PE=3 SV=1	2	4	4	4	3	4	4	3	3	3	4	1	3	4	4	3	3	3	4	1	3	4	4	3	3	3	4	1	20.7	20.7	20.7	23.723	213	213;212	0	9.9207	By matching	By MS/MS	By MS/MS	By matching	By matching	By MS/MS	By MS/MS
228	K4C3U1	K4C3U1	5	5	5	>tr|K4C3U1|K4C3U1_SOLLC Uncharacterized protein OS=Solanum lycopersicum PE=3 SV=1	1	5	5	5	2	3	2	3	5	5	3	3	2	3	2	3	5	5	3	3	2	3	2	3	5	5	3	3	17.4	17.4	17.4	46.021	420	420	0	9.9756	By MS/MS	By MS/MS	By MS/MS	By matching	By MS/MS	By MS/MS	By MS/MS
229	K4C455;K4D7F1	K4C455	3;1	3;1	3;1	>tr|K4C455|K4C455_SOLLC Uncharacterized protein OS=Solanum lycopersicum PE=4 SV=1	2	3	3	3	1	2	3	2	2	2	3	0	1	2	3	2	2	2	3	0	1	2	3	2	2	2	3	0	11.4	11.4	11.4	47.052	413	413;414	0	24.823	By MS/MS	By MS/MS	By MS/MS	By matching	By matching	By matching	By MS/MS
231	K4C5E1	K4C5E1	2	2	2	>tr|K4C5E1|K4C5E1_SOLLC Uncharacterized protein OS=Solanum lycopersicum PE=4 SV=1	1	2	2	2	0	1	1	2	2	2	2	1	0	1	1	2	2	2	2	1	0	1	1	2	2	2	2	1	3.6	3.6	3.6	96.808	894	894	0	4.3207	By matching	By matching	By matching	By MS/MS	By MS/MS	By MS/MS	By matching
232	K4C5G0	K4C5G0	3	1	1	>tr|K4C5G0|K4C5G0_SOLLC Alpha-galactosidase OS=Solanum lycopersicum PE=3 SV=1	1	3	1	1	3	2	2	2	2	2	2	2	1	0	0	0	0	0	0	0	1	0	0	0	0	0	0	0	8	3.5	3.5	47.171	425	425	0	28.664	By MS/MS	By matching	By matching	By matching	By matching	By matching	By matching
233	K4C5I8	K4C5I8	14	10	10	>tr|K4C5I8|K4C5I8_SOLLC Peroxidase OS=Solanum lycopersicum PE=3 SV=1	1	14	10	10	11	13	13	10	13	12	12	9	7	9	9	6	9	8	8	5	7	9	9	6	9	8	8	5	49.5	37	37	34.566	319	319	0	124.55	By MS/MS	By MS/MS	By MS/MS	By MS/MS	By MS/MS	By MS/MS	By MS/MS
234	K4C6L0	K4C6L0	2	2	2	>tr|K4C6L0|K4C6L0_SOLLC Protein disulfide-isomerase OS=Solanum lycopersicum PE=3 SV=1	1	2	2	2	1	2	2	2	2	2	2	2	1	2	2	2	2	2	2	2	1	2	2	2	2	2	2	2	5.5	5.5	5.5	49.243	438	438	0	2.4321	By matching	By matching	By MS/MS	By MS/MS	By matching	By matching	By MS/MS
235	K4C6V9	K4C6V9	2	2	2	>tr|K4C6V9|K4C6V9_SOLLC Uncharacterized protein OS=Solanum lycopersicum PE=4 SV=1	1	2	2	2	2	2	2	1	2	2	2	1	2	2	2	1	2	2	2	1	2	2	2	1	2	2	2	1	11.6	11.6	11.6	25.318	224	224	0	6.4997	By MS/MS	By MS/MS	By matching	By matching	By MS/MS	By MS/MS	By MS/MS
236	K4C6W9	K4C6W9	4	4	4	>tr|K4C6W9|K4C6W9_SOLLC Uncharacterized protein OS=Solanum lycopersicum PE=4 SV=1	1	4	4	4	4	4	1	3	4	0	3	1	4	4	1	3	4	0	3	1	4	4	1	3	4	0	3	1	19.9	19.9	19.9	29.704	266	266	0	58.475	By MS/MS	By MS/MS	By matching	By matching	By MS/MS	By matching	By matching
237	K4C726	K4C726	4	4	4	>tr|K4C726|K4C726_SOLLC Uncharacterized protein OS=Solanum lycopersicum PE=4 SV=1	1	4	4	4	2	4	2	3	3	3	3	3	2	4	2	3	3	3	3	3	2	4	2	3	3	3	3	3	8.1	8.1	8.1	82.73	776	776	0	24.293	By matching	By MS/MS	By MS/MS	By MS/MS	By MS/MS	By MS/MS	By MS/MS
241	K4C8C0	K4C8C0	3	3	3	>tr|K4C8C0|K4C8C0_SOLLC Uncharacterized protein OS=Solanum lycopersicum PE=4 SV=1	1	3	3	3	2	2	3	1	2	2	3	3	2	2	3	1	2	2	3	3	2	2	3	1	2	2	3	3	10.2	10.2	10.2	45.334	391	391	0	1.9075	By matching	By MS/MS	By MS/MS	By MS/MS	By MS/MS	By MS/MS	By matching
242	K4C8H3	K4C8H3	9	9	9	>tr|K4C8H3|K4C8H3_SOLLC Uncharacterized protein OS=Solanum lycopersicum PE=4 SV=1	1	9	9	9	5	8	8	8	8	7	8	4	5	8	8	8	8	7	8	4	5	8	8	8	8	7	8	4	24	24	24	61.513	554	554	0	21.518	By MS/MS	By matching	By MS/MS	By MS/MS	By MS/MS	By matching	By MS/MS
243	K4C8U3	K4C8U3	8	8	7	>tr|K4C8U3|K4C8U3_SOLLC Uncharacterized protein OS=Solanum lycopersicum PE=4 SV=1	1	8	8	7	7	7	8	7	8	7	8	8	7	7	8	7	8	7	8	8	6	6	7	6	7	6	7	7	46	46	42.2	23.333	211	211	0	27.611	By MS/MS	By MS/MS	By MS/MS	By MS/MS	By MS/MS	By MS/MS	By MS/MS
244	K4C8U4	K4C8U4	6	5	5	>tr|K4C8U4|K4C8U4_SOLLC Uncharacterized protein OS=Solanum lycopersicum PE=4 SV=1	1	6	5	5	5	6	5	5	6	4	5	4	4	5	4	4	5	3	4	3	4	5	4	4	5	3	4	3	33.5	29.5	29.5	22.26	200	200	0	7.1743	By MS/MS	By MS/MS	By MS/MS	By MS/MS	By MS/MS	By MS/MS	By MS/MS
245	K4C947	K4C947	10	10	10	>tr|K4C947|K4C947_SOLLC Uncharacterized protein OS=Solanum lycopersicum PE=3 SV=1	1	10	10	10	8	10	9	8	9	10	9	8	8	10	9	8	9	10	9	8	8	10	9	8	9	10	9	8	30.4	30.4	30.4	50.268	461	461	0	27.531	By MS/MS	By MS/MS	By MS/MS	By MS/MS	By MS/MS	By MS/MS	By MS/MS
246	K4C994;K4C992;K4DAM1;K4ATC0	K4C994	6;2;2;2	6;2;2;2	4;0;0;0	>tr|K4C994|K4C994_SOLLC Uncharacterized protein OS=Solanum lycopersicum PE=4 SV=1	4	6	6	4	3	6	4	6	6	6	6	5	3	6	4	6	6	6	6	5	1	4	2	4	4	4	4	3	12.7	12.7	9.7	68.819	628	628;624;629;634	0	13.888	By matching	By MS/MS	By MS/MS	By MS/MS	By MS/MS	By MS/MS	By MS/MS
247	K4C9K1	K4C9K1	13	13	12	>tr|K4C9K1|K4C9K1_SOLLC Carboxypeptidase OS=Solanum lycopersicum PE=3 SV=1	1	13	13	12	12	12	10	10	10	11	10	11	12	12	10	10	10	11	10	11	11	11	9	9	9	10	9	10	30	30	28.1	56.034	494	494	0	60.123	By MS/MS	By MS/MS	By MS/MS	By MS/MS	By MS/MS	By MS/MS	By matching
249	K4CA23	K4CA23	9	9	9	>tr|K4CA23|K4CA23_SOLLC Peroxidase OS=Solanum lycopersicum PE=3 SV=1	1	9	9	9	8	9	7	7	8	8	8	6	8	9	7	7	8	8	8	6	8	9	7	7	8	8	8	6	36.9	36.9	36.9	35.182	317	317	0	192.74	By MS/MS	By MS/MS	By MS/MS	By MS/MS	By MS/MS	By MS/MS	By MS/MS
250	K4CA83;K4CA85	K4CA83	3;1	3;1	3;1	>tr|K4CA83|K4CA83_SOLLC Laccase OS=Solanum lycopersicum PE=3 SV=1	2	3	3	3	2	2	1	2	2	0	1	2	2	2	1	2	2	0	1	2	2	2	1	2	2	0	1	2	6.8	6.8	6.8	62.505	562	562;224	0	2.9899	By MS/MS	By matching	By matching	By matching	By MS/MS	By matching	By matching
251	K4CAA1	K4CAA1	14	14	14	>tr|K4CAA1|K4CAA1_SOLLC Peroxidase OS=Solanum lycopersicum PE=3 SV=1	1	14	14	14	9	10	8	13	12	10	12	10	9	10	8	13	12	10	12	10	9	10	8	13	12	10	12	10	60.9	60.9	60.9	33.535	312	312	0	188.99	By MS/MS	By MS/MS	By MS/MS	By MS/MS	By MS/MS	By MS/MS	By MS/MS
252	K4CAF9;K4CAG0;K4CAF7;K4CAF8	K4CAF9;K4CAG0;K4CAF7	3;2;2;1	3;2;2;1	3;2;2;1	>tr|K4CAF9|K4CAF9_SOLLC Carboxypeptidase OS=Solanum lycopersicum PE=3 SV=1;>tr|K4CAG0|K4CAG0_SOLLC Carboxypeptidase OS=Solanum lycopersicum PE=3 SV=1;>tr|K4CAF7|K4CAF7_SOLLC Carboxypeptidase OS=Solanum lycopersicum PE=3 SV=1	4	3	3	3	3	3	3	3	2	3	2	1	3	3	3	3	2	3	2	1	3	3	3	3	2	3	2	1	7.6	7.6	7.6	55.66	498	498;498;498;499	0	19.552	By matching	By MS/MS	By MS/MS	By MS/MS	By MS/MS	By matching	By matching
254	K4CAY1	K4CAY1	8	8	8	>tr|K4CAY1|K4CAY1_SOLLC Uncharacterized protein OS=Solanum lycopersicum PE=3 SV=1	1	8	8	8	8	5	6	6	7	7	7	6	8	5	6	6	7	7	7	6	8	5	6	6	7	7	7	6	29.9	29.9	29.9	41.514	371	371	0	63.759	By MS/MS	By MS/MS	By MS/MS	By MS/MS	By MS/MS	By MS/MS	By MS/MS
255	K4CAY2	K4CAY2	6	6	6	>tr|K4CAY2|K4CAY2_SOLLC Uncharacterized protein OS=Solanum lycopersicum PE=4 SV=1	1	6	6	6	5	4	5	6	4	4	5	3	5	4	5	6	4	4	5	3	5	4	5	6	4	4	5	3	16.5	16.5	16.5	41.85	376	376	0	64.024	By MS/MS	By MS/MS	By MS/MS	By MS/MS	By MS/MS	By MS/MS	By MS/MS
257	K4CB67	K4CB67	3	3	3	>tr|K4CB67|K4CB67_SOLLC Carboxypeptidase OS=Solanum lycopersicum PE=3 SV=1	1	3	3	3	2	2	0	0	1	2	2	1	2	2	0	0	1	2	2	1	2	2	0	0	1	2	2	1	6.5	6.5	6.5	52.2	465	465	0	3.8759	By MS/MS	By matching	By matching	By matching	By matching	By matching	By MS/MS
258	K4CBC7	K4CBC7	2	2	2	>tr|K4CBC7|K4CBC7_SOLLC Uncharacterized protein OS=Solanum lycopersicum PE=3 SV=1	1	2	2	2	2	2	2	2	2	2	2	2	2	2	2	2	2	2	2	2	2	2	2	2	2	2	2	2	11.4	11.4	11.4	17.015	149	149	0	3.4696	By matching	By matching	By matching	By MS/MS	By matching	By MS/MS	By MS/MS
259	K4CBC8	K4CBC8	4	4	4	>tr|K4CBC8|K4CBC8_SOLLC Uncharacterized protein OS=Solanum lycopersicum PE=3 SV=1	1	4	4	4	4	4	4	3	3	4	4	3	4	4	4	3	3	4	4	3	4	4	4	3	3	4	4	3	16.5	16.5	16.5	27.109	243	243	0	10.014	By MS/MS	By MS/MS	By MS/MS	By MS/MS	By matching	By MS/MS	By MS/MS
263	K4CBM5	K4CBM5	7	7	6	>tr|K4CBM5|K4CBM5_SOLLC Uncharacterized protein OS=Solanum lycopersicum PE=4 SV=1	1	7	7	6	6	6	7	6	7	6	7	7	6	6	7	6	7	6	7	7	6	6	6	5	6	6	6	6	19.6	19.6	18.1	59.539	536	536	0	20.968	By MS/MS	By MS/MS	By MS/MS	By MS/MS	By MS/MS	By MS/MS	By MS/MS
264	K4CBN7	K4CBN7	6	5	5	>tr|K4CBN7|K4CBN7_SOLLC Purple acid phosphatase OS=Solanum lycopersicum PE=3 SV=1	1	6	5	5	5	6	5	6	6	6	6	5	4	5	4	5	5	5	5	4	4	5	4	5	5	5	5	4	18.9	17	17	54.843	477	477	0	14.646	By MS/MS	By MS/MS	By MS/MS	By MS/MS	By MS/MS	By MS/MS	By MS/MS
267	K4CCH4	K4CCH4	2	2	2	>tr|K4CCH4|K4CCH4_SOLLC Pectinesterase OS=Solanum lycopersicum PE=4 SV=1	1	2	2	2	2	2	2	2	2	2	2	2	2	2	2	2	2	2	2	2	2	2	2	2	2	2	2	2	3.5	3.5	3.5	59.97	539	539	0.009009	0.85627	By MS/MS	By matching	By matching	By matching	By matching	By matching	By matching
268	K4CCK4	K4CCK4	2	2	2	>tr|K4CCK4|K4CCK4_SOLLC Uncharacterized protein OS=Solanum lycopersicum PE=4 SV=1	1	2	2	2	2	2	2	2	2	2	2	2	2	2	2	2	2	2	2	2	2	2	2	2	2	2	2	2	8.6	8.6	8.6	35.409	314	314	0	12.786	By MS/MS	By MS/MS	By MS/MS	By MS/MS	By MS/MS	By MS/MS	By MS/MS
269	K4CDN1;K4CDN0	K4CDN1;K4CDN0	4;3	4;3	4;3	>tr|K4CDN1|K4CDN1_SOLLC Uncharacterized protein OS=Solanum lycopersicum PE=4 SV=1;>tr|K4CDN0|K4CDN0_SOLLC Uncharacterized protein OS=Solanum lycopersicum PE=4 SV=1	2	4	4	4	3	4	4	4	3	4	4	2	3	4	4	4	3	4	4	2	3	4	4	4	3	4	4	2	10.3	10.3	10.3	54.105	485	485;484	0	9.4048	By matching	By MS/MS	By MS/MS	By MS/MS	By matching	By MS/MS	By MS/MS
271	K4CEI4	K4CEI4	2	2	2	>tr|K4CEI4|K4CEI4_SOLLC Pectinesterase OS=Solanum lycopersicum PE=4 SV=1	1	2	2	2	2	2	2	2	2	2	2	2	2	2	2	2	2	2	2	2	2	2	2	2	2	2	2	2	8	8	8	42.812	389	389	0	34.054	By MS/MS	By MS/MS	By MS/MS	By MS/MS	By MS/MS	By MS/MS	By MS/MS
272	K4CEP2	K4CEP2	7	7	7	>tr|K4CEP2|K4CEP2_SOLLC Uncharacterized protein OS=Solanum lycopersicum PE=4 SV=1	1	7	7	7	3	5	6	5	4	5	7	1	3	5	6	5	4	5	7	1	3	5	6	5	4	5	7	1	14.8	14.8	14.8	61.142	559	559	0	23.409	By matching	By MS/MS	By MS/MS	By MS/MS	By matching	By MS/MS	By MS/MS
273	P29795;K4CEP4	P29795;K4CEP4	3;3	3;3	3;3	>sp|P29795|PSBP_SOLLC Oxygen-evolving enhancer protein 2, chloroplastic OS=Solanum lycopersicum GN=PSBP PE=2 SV=1;>tr|K4CEP4|K4CEP4_SOLLC Uncharacterized protein OS=Solanum lycopersicum PE=4 SV=1	2	3	3	3	3	3	3	3	3	3	2	1	3	3	3	3	3	3	2	1	3	3	3	3	3	3	2	1	21.7	21.7	21.7	27.792	258	258;258	0	12.439	By MS/MS	By matching	By matching	By MS/MS	By matching	By matching	By matching
274	K4CEV0	K4CEV0	16	16	16	>tr|K4CEV0|K4CEV0_SOLLC Uncharacterized protein OS=Solanum lycopersicum PE=4 SV=1	1	16	16	16	11	13	13	15	15	13	15	14	11	13	13	15	15	13	15	14	11	13	13	15	15	13	15	14	33.7	33.7	33.7	44.082	409	409	0	276.34	By MS/MS	By MS/MS	By MS/MS	By MS/MS	By MS/MS	By MS/MS	By MS/MS
278	K4CF40	K4CF40	2	2	2	>tr|K4CF40|K4CF40_SOLLC Uncharacterized protein OS=Solanum lycopersicum PE=3 SV=1	1	2	2	2	2	2	2	2	2	2	2	1	2	2	2	2	2	2	2	1	2	2	2	2	2	2	2	1	7.5	7.5	7.5	51.321	468	468	0	36.867	By MS/MS	By MS/MS	By matching	By MS/MS	By MS/MS	By matching	By matching
279	K4CFC3	K4CFC3	4	4	4	>tr|K4CFC3|K4CFC3_SOLLC Uncharacterized protein OS=Solanum lycopersicum PE=4 SV=1	1	4	4	4	3	4	4	3	4	4	4	4	3	4	4	3	4	4	4	4	3	4	4	3	4	4	4	4	10.7	10.7	10.7	60.508	543	543	0	11.479	By MS/MS	By MS/MS	By MS/MS	By MS/MS	By MS/MS	By MS/MS	By MS/MS
280	K4CFD4	K4CFD4	9	2	2	>tr|K4CFD4|K4CFD4_SOLLC Aconitate hydratase OS=Solanum lycopersicum PE=3 SV=1	1	9	2	2	4	9	8	9	7	8	8	6	0	2	2	2	1	2	2	2	0	2	2	2	1	2	2	2	12.4	3.2	3.2	108.2	995	995	0	6.1638	By matching	By MS/MS	By MS/MS	By MS/MS	By MS/MS	By matching	By MS/MS
281	K4CFF0;K4BVR5;K4DH08;K4DH07;K4B1D5;K4CMV0;K4C0T3;K4CUU6;K4DBB7;K4AX33;K4BHZ1;K4C0T4;K4CF27;K4CEY0	K4CFF0	16;1;1;1;1;1;1;1;1;1;1;1;1;1	16;1;1;1;1;1;1;1;1;1;1;1;1;1	15;0;0;0;0;0;0;0;0;0;0;0;0;0	>tr|K4CFF0|K4CFF0_SOLLC Peroxidase OS=Solanum lycopersicum PE=3 SV=1	14	16	16	15	12	13	14	12	12	13	14	13	12	13	14	12	12	13	14	13	12	12	13	11	11	12	13	13	46	46	43.3	35.937	328	328;314;318;318;321;322;322;323;324;324;325;327;331;331	0	95.707	By MS/MS	By MS/MS	By MS/MS	By MS/MS	By MS/MS	By MS/MS	By MS/MS
283	K4CG46;K4CXQ8	K4CG46;K4CXQ8	2;1	2;1	2;1	>tr|K4CG46|K4CG46_SOLLC Uncharacterized protein OS=Solanum lycopersicum PE=3 SV=1;>tr|K4CXQ8|K4CXQ8_SOLLC Uncharacterized protein OS=Solanum lycopersicum PE=3 SV=1	2	2	2	2	2	1	1	1	1	0	1	1	2	1	1	1	1	0	1	1	2	1	1	1	1	0	1	1	1.8	1.8	1.8	109.95	964	964;964	0	1.2271	By MS/MS	By matching	By matching	By matching	By matching	By matching	By matching
284	K4CGA2	K4CGA2	4	4	4	>tr|K4CGA2|K4CGA2_SOLLC Uncharacterized protein OS=Solanum lycopersicum PE=4 SV=1	1	4	4	4	2	3	2	3	4	3	1	2	2	3	2	3	4	3	1	2	2	3	2	3	4	3	1	2	11.8	11.8	11.8	49.002	448	448	0	33.933	By MS/MS	By matching	By matching	By MS/MS	By MS/MS	By MS/MS	By matching
285	Q42882;K4CGE7;K4DCJ8	Q42882;K4CGE7;K4DCJ8	2;2;1	2;2;1	2;2;1	>sp|Q42882|GLGS_SOLLC Glucose-1-phosphate adenylyltransferase small subunit, chloroplastic OS=Solanum lycopersicum PE=2 SV=1;>tr|K4CGE7|K4CGE7_SOLLC Glucose-1-phosphate adenylyltransferase OS=Solanum lycopersicum PE=3 SV=1;>tr|K4DCJ8|K4DCJ8_SOLLC Glucose-1	3	2	2	2	2	2	2	1	1	2	1	1	2	2	2	1	1	2	1	1	2	2	2	1	1	2	1	1	4.4	4.4	4.4	57.37	521	521;521;442	0	4.1849	By MS/MS	By MS/MS	By MS/MS	By matching	By matching	By matching	By matching
286	K4CGQ4	K4CGQ4	3	3	3	>tr|K4CGQ4|K4CGQ4_SOLLC Uncharacterized protein OS=Solanum lycopersicum PE=4 SV=1	1	3	3	3	2	3	2	3	3	3	2	1	2	3	2	3	3	3	2	1	2	3	2	3	3	3	2	1	8.7	8.7	8.7	45.106	393	393	0	15.906	By matching	By MS/MS	By matching	By MS/MS	By MS/MS	By MS/MS	By matching
287	K4CGU8	K4CGU8	15	15	12	>tr|K4CGU8|K4CGU8_SOLLC Malate dehydrogenase OS=Solanum lycopersicum PE=3 SV=1	1	15	15	12	9	13	11	12	12	13	12	9	9	13	11	12	12	13	12	9	6	10	8	9	10	11	10	7	54.3	54.3	48.6	36.081	346	346	0	73.915	By MS/MS	By MS/MS	By MS/MS	By MS/MS	By MS/MS	By MS/MS	By MS/MS
288	K4CH57	K4CH57	5	5	5	>tr|K4CH57|K4CH57_SOLLC Uncharacterized protein OS=Solanum lycopersicum PE=4 SV=1	1	5	5	5	1	4	3	5	5	5	4	4	1	4	3	5	5	5	4	4	1	4	3	5	5	5	4	4	29.6	29.6	29.6	28.516	267	267	0	27.083	By matching	By MS/MS	By MS/MS	By MS/MS	By MS/MS	By MS/MS	By MS/MS
290	K4CHA5	K4CHA5	4	4	4	>tr|K4CHA5|K4CHA5_SOLLC Uncharacterized protein OS=Solanum lycopersicum PE=4 SV=1	1	4	4	4	2	4	2	4	4	4	3	4	2	4	2	4	4	4	3	4	2	4	2	4	4	4	3	4	25.7	25.7	25.7	23.284	218	218	0	53.401	By MS/MS	By MS/MS	By MS/MS	By MS/MS	By MS/MS	By MS/MS	By MS/MS
291	K4CHJ1;K4DCZ2	K4CHJ1	10;1	10;1	10;1	>tr|K4CHJ1|K4CHJ1_SOLLC Uncharacterized protein OS=Solanum lycopersicum PE=4 SV=1	2	10	10	10	5	10	10	10	10	10	9	10	5	10	10	10	10	10	9	10	5	10	10	10	10	10	9	10	16.6	16.6	16.6	82.143	753	753;751	0	77.246	By MS/MS	By MS/MS	By MS/MS	By MS/MS	By MS/MS	By MS/MS	By MS/MS
293	K4CHZ2	K4CHZ2	4	4	4	>tr|K4CHZ2|K4CHZ2_SOLLC Uncharacterized protein OS=Solanum lycopersicum PE=3 SV=1	1	4	4	4	2	3	2	4	4	4	3	2	2	3	2	4	4	4	3	2	2	3	2	4	4	4	3	2	13.2	13.2	13.2	46.682	438	438	0	8.9003	By MS/MS	By MS/MS	By MS/MS	By MS/MS	By MS/MS	By MS/MS	By MS/MS
294	K4CI69	K4CI69	11	11	11	>tr|K4CI69|K4CI69_SOLLC Uncharacterized protein OS=Solanum lycopersicum PE=4 SV=1	1	11	11	11	9	9	6	8	10	10	11	9	9	9	6	8	10	10	11	9	9	9	6	8	10	10	11	9	48	48	48	33.324	300	300	0	103.95	By MS/MS	By MS/MS	By MS/MS	By MS/MS	By MS/MS	By MS/MS	By MS/MS
295	K4CIG7	K4CIG7	4	4	4	>tr|K4CIG7|K4CIG7_SOLLC Uncharacterized protein OS=Solanum lycopersicum PE=4 SV=1	1	4	4	4	4	4	4	4	4	4	4	3	4	4	4	4	4	4	4	3	4	4	4	4	4	4	4	3	14.4	14.4	14.4	19.067	174	174	0	9.4488	By MS/MS	By MS/MS	By MS/MS	By MS/MS	By MS/MS	By MS/MS	By MS/MS
297	K4CIQ4;K4CIP7	K4CIQ4	10;4	8;3	8;3	>tr|K4CIQ4|K4CIQ4_SOLLC Uncharacterized protein OS=Solanum lycopersicum PE=4 SV=1	2	10	8	8	4	9	10	9	10	10	9	9	3	7	8	7	8	8	7	7	3	7	8	7	8	8	7	7	21.4	17.1	17.1	79.678	744	744;743	0	41.188	By matching	By MS/MS	By MS/MS	By MS/MS	By MS/MS	By MS/MS	By MS/MS
299	K4CK47;tr|A0A0D2Y2T1|A0A0D2Y2T1_FUSO4 Uncharacterized protein OS=Fusarium oxysporum f. sp. lycopersici (strain 4287 / CBS 123668 / FGSC 9935 / NRRL 34936) GN=FOXG_10580 PE=4 SV=1;W9K250;tr|A0A0J9VGH4|A0A0J9VGH4_FUSO4 Uncharacterized protein OS=Fusarium oxysporum f. sp. lycopersici (strain 4287 / CBS 123668 / FGSC 9935 / NRRL 34936) GN=FOXG_10580 PE=4 SV=1	K4CK47	8;1;1;1	8;1;1;1	8;1;1;1	>tr|K4CK47|K4CK47_SOLLC Aspartate aminotransferase OS=Solanum lycopersicum PE=4 SV=1	4	8	8	8	5	7	8	6	6	7	6	0	5	7	8	6	6	7	6	0	5	7	8	6	6	7	6	0	14.9	14.9	14.9	50.845	462	462;717;775;775	0	20.634	By matching	By MS/MS	By MS/MS	By matching	By matching	By MS/MS	By MS/MS
300	K4CKP9	K4CKP9	2	2	2	>tr|K4CKP9|K4CKP9_SOLLC Uncharacterized protein OS=Solanum lycopersicum PE=4 SV=1	1	2	2	2	1	1	1	2	2	1	1	0	1	1	1	2	2	1	1	0	1	1	1	2	2	1	1	0	24	24	24	14.049	129	129	0	2.7471	By matching	By matching	By MS/MS	By MS/MS	By matching	By matching	By matching
302	K4CL50	K4CL50	5	5	5	>tr|K4CL50|K4CL50_SOLLC Uncharacterized protein OS=Solanum lycopersicum PE=4 SV=1	1	5	5	5	3	4	3	5	4	5	5	2	3	4	3	5	4	5	5	2	3	4	3	5	4	5	5	2	7.3	7.3	7.3	99.118	875	875	0	13.067	By MS/MS	By matching	By MS/MS	By MS/MS	By MS/MS	By matching	By matching
303	K4CL74;K4CL75	K4CL74;K4CL75	3;3	3;3	3;3	>tr|K4CL74|K4CL74_SOLLC Uncharacterized protein OS=Solanum lycopersicum PE=4 SV=1;>tr|K4CL75|K4CL75_SOLLC Uncharacterized protein OS=Solanum lycopersicum PE=4 SV=1	2	3	3	3	3	2	2	3	2	3	1	0	3	2	2	3	2	3	1	0	3	2	2	3	2	3	1	0	4.8	4.8	4.8	85.997	770	770;828	0	2.979	By MS/MS	By MS/MS	By matching	By matching	By matching	By matching	By matching
305	K4CLE1	K4CLE1	3	3	3	>tr|K4CLE1|K4CLE1_SOLLC Uncharacterized protein OS=Solanum lycopersicum PE=4 SV=1	1	3	3	3	2	3	2	3	3	2	2	1	2	3	2	3	3	2	2	1	2	3	2	3	3	2	2	1	11.4	11.4	11.4	53.22	482	482	0	15.749	By MS/MS	By MS/MS	By MS/MS	By MS/MS	By matching	By MS/MS	By matching
306	K4CLE4	K4CLE4	2	2	2	>tr|K4CLE4|K4CLE4_SOLLC Uncharacterized protein OS=Solanum lycopersicum PE=4 SV=1	1	2	2	2	2	2	1	2	2	2	2	2	2	2	1	2	2	2	2	2	2	2	1	2	2	2	2	2	13.7	13.7	13.7	22.575	204	204	0	3.2972	By MS/MS	By matching	By matching	By MS/MS	By MS/MS	By matching	By MS/MS
307	K4CLQ0	K4CLQ0	4	4	4	>tr|K4CLQ0|K4CLQ0_SOLLC Uncharacterized protein OS=Solanum lycopersicum PE=4 SV=1	1	4	4	4	3	4	4	4	4	4	4	3	3	4	4	4	4	4	4	3	3	4	4	4	4	4	4	3	25	25	25	22.134	200	200	0	23.938	By MS/MS	By MS/MS	By MS/MS	By MS/MS	By MS/MS	By MS/MS	By MS/MS
308	K4CLQ7	K4CLQ7	7	7	7	>tr|K4CLQ7|K4CLQ7_SOLLC Uncharacterized protein OS=Solanum lycopersicum PE=3 SV=1	1	7	7	7	6	6	5	7	7	7	7	7	6	6	5	7	7	7	7	7	6	6	5	7	7	7	7	7	14.4	14.4	14.4	62.857	561	561	0	21.624	By MS/MS	By MS/MS	By matching	By MS/MS	By MS/MS	By MS/MS	By matching
309	K4CLT6	K4CLT6	21	21	21	>tr|K4CLT6|K4CLT6_SOLLC Uncharacterized protein OS=Solanum lycopersicum PE=3 SV=1	1	21	21	21	17	19	18	19	18	17	18	18	17	19	18	19	18	17	18	18	17	19	18	19	18	17	18	18	39.7	39.7	39.7	53.776	501	501	0	169.74	By MS/MS	By MS/MS	By MS/MS	By MS/MS	By MS/MS	By MS/MS	By MS/MS
310	K4CM66	K4CM66	7	7	7	>tr|K4CM66|K4CM66_SOLLC Uncharacterized protein OS=Solanum lycopersicum PE=4 SV=1	1	7	7	7	4	3	3	6	7	5	2	3	4	3	3	6	7	5	2	3	4	3	3	6	7	5	2	3	15	15	15	65.299	585	585	0	17.248	By MS/MS	By MS/MS	By matching	By MS/MS	By MS/MS	By matching	By matching
311	K4CMF9	K4CMF9	6	5	5	>tr|K4CMF9|K4CMF9_SOLLC Uncharacterized protein OS=Solanum lycopersicum PE=3 SV=1	1	6	5	5	4	5	4	5	6	4	5	5	4	5	4	5	5	4	4	4	4	5	4	5	5	4	4	4	18.4	16.6	16.6	52.95	489	489	0	65.71	By MS/MS	By MS/MS	By MS/MS	By MS/MS	By MS/MS	By MS/MS	By MS/MS
312	Q08307;K4CMI0;K4CMI1;Q08296;K4CMI3;K4CMI2	Q08307;K4CMI0;K4CMI1;Q08296	14;14;11;9;1;1	14;14;11;9;1;1	13;13;10;8;0;0	>sp|Q08307|PPOE_SOLLC Polyphenol oxidase E, chloroplastic OS=Solanum lycopersicum PE=3 SV=1;>tr|K4CMI0|K4CMI0_SOLLC Uncharacterized protein OS=Solanum lycopersicum PE=4 SV=1;>tr|K4CMI1|K4CMI1_SOLLC Uncharacterized protein OS=Solanum lycopersicum PE=4 SV=1;	6	14	14	13	10	14	13	12	11	10	13	5	10	14	13	12	11	10	13	5	10	13	12	11	10	9	12	5	30.7	30.7	29.5	66.236	587	587;587;587;585;503;599	0	142.74	By MS/MS	By MS/MS	By MS/MS	By MS/MS	By MS/MS	By MS/MS	By MS/MS
313	K4CMI6;Q08304;Q08306	K4CMI6;Q08304	10;9;1	9;8;1	9;8;1	>tr|K4CMI6|K4CMI6_SOLLC Uncharacterized protein OS=Solanum lycopersicum PE=4 SV=1;>sp|Q08304|PPOB_SOLLC Polyphenol oxidase B, chloroplastic OS=Solanum lycopersicum PE=3 SV=1	3	10	9	9	8	9	10	8	9	10	10	6	8	8	9	7	8	9	9	6	8	8	9	7	8	9	9	6	5.7	5.3	5.3	203.33	1806	1806;596;591	0	16.11	By matching	By MS/MS	By MS/MS	By MS/MS	By MS/MS	By MS/MS	By MS/MS
315	K4CMQ6	K4CMQ6	4	4	4	>tr|K4CMQ6|K4CMQ6_SOLLC Uncharacterized protein OS=Solanum lycopersicum PE=4 SV=1	1	4	4	4	4	4	4	3	3	4	4	2	4	4	4	3	3	4	4	2	4	4	4	3	3	4	4	2	5.1	5.1	5.1	88.541	783	783	0	11.574	By MS/MS	By matching	By MS/MS	By matching	By MS/MS	By MS/MS	By MS/MS
316	K4CNR8	K4CNR8	3	3	3	>tr|K4CNR8|K4CNR8_SOLLC Uncharacterized protein OS=Solanum lycopersicum PE=4 SV=1	1	3	3	3	3	3	3	3	3	3	3	3	3	3	3	3	3	3	3	3	3	3	3	3	3	3	3	3	5.8	5.8	5.8	66.157	589	589	0	13.755	By MS/MS	By MS/MS	By MS/MS	By MS/MS	By MS/MS	By MS/MS	By MS/MS
317	K4CNY6;K4CNZ1	K4CNY6	13;4	9;2	5;0	>tr|K4CNY6|K4CNY6_SOLLC Uncharacterized protein OS=Solanum lycopersicum PE=4 SV=1	2	13	9	5	4	13	12	13	13	13	13	10	1	9	8	9	9	9	9	6	0	5	4	5	5	5	5	3	29.8	23.9	15.7	79.172	745	745;745	0	106.46	By matching	By MS/MS	By MS/MS	By MS/MS	By MS/MS	By MS/MS	By MS/MS
318	K4CNZ0;K4CIQ6;K4CIQ7;K4CIQ5;O65836	K4CNZ0	22;1;1;1;1	14;0;0;0;1	10;0;0;0;0	>tr|K4CNZ0|K4CNZ0_SOLLC Uncharacterized protein OS=Solanum lycopersicum PE=4 SV=1	5	22	14	10	4	18	17	21	21	22	17	17	1	11	10	13	13	14	11	10	1	9	8	10	10	10	9	8	42.4	32.9	22.1	79.473	748	748;738;743;745;747	0	126.63	By matching	By MS/MS	By MS/MS	By MS/MS	By MS/MS	By MS/MS	By MS/MS
319	K4CP59	K4CP59	6	6	6	>tr|K4CP59|K4CP59_SOLLC Uncharacterized protein OS=Solanum lycopersicum PE=4 SV=1	1	6	6	6	6	5	6	6	4	5	6	6	6	5	6	6	4	5	6	6	6	5	6	6	4	5	6	6	37.6	37.6	37.6	17.506	157	157	0	39.422	By matching	By matching	By MS/MS	By MS/MS	By matching	By MS/MS	By MS/MS
320	K4CP63;Q01591;K4CP65;K4CP64	K4CP63;Q01591	7;6;2;1	7;6;2;1	4;3;2;1	>tr|K4CP63|K4CP63_SOLLC Uncharacterized protein OS=Solanum lycopersicum PE=4 SV=1;>sp|Q01591|TPM1_SOLLC Osmotin-like protein TPM-1 (Fragment) OS=Solanum lycopersicum GN=TPM-1 PE=2 SV=1	4	7	7	4	4	5	5	6	5	6	6	4	4	5	5	6	5	6	6	4	2	3	3	4	3	4	3	2	48.4	48.4	35.8	26.704	246	246;238;250;250	0	109.9	By MS/MS	By MS/MS	By MS/MS	By MS/MS	By MS/MS	By MS/MS	By MS/MS
321	K4CPC2	K4CPC2	3	3	3	>tr|K4CPC2|K4CPC2_SOLLC Uncharacterized protein OS=Solanum lycopersicum PE=4 SV=1	1	3	3	3	1	1	1	1	1	2	2	1	1	1	1	1	1	2	2	1	1	1	1	1	1	2	2	1	4.6	4.6	4.6	113.16	999	999	0	7.5166	By MS/MS	By matching	By MS/MS	By MS/MS	By matching	By matching	By MS/MS
322	K4CPC9	K4CPC9	2	2	2	>tr|K4CPC9|K4CPC9_SOLLC Beta-adaptin-like protein OS=Solanum lycopersicum PE=3 SV=1	1	2	2	2	0	1	0	2	1	2	1	0	0	1	0	2	1	2	1	0	0	1	0	2	1	2	1	0	2.2	2.2	2.2	99.655	896	896	0	24.624	By matching	By MS/MS	By matching	By MS/MS	By matching	By MS/MS	By MS/MS
323	K4CPE5	K4CPE5	11	11	11	>tr|K4CPE5|K4CPE5_SOLLC Uncharacterized protein OS=Solanum lycopersicum PE=3 SV=1	1	11	11	11	10	11	11	11	11	11	11	11	10	11	11	11	11	11	11	11	10	11	11	11	11	11	11	11	34.6	34.6	34.6	52.895	483	483	0	140.68	By MS/MS	By MS/MS	By MS/MS	By MS/MS	By MS/MS	By MS/MS	By MS/MS
324	K4CPT2	K4CPT2	3	3	3	>tr|K4CPT2|K4CPT2_SOLLC Trehalase OS=Solanum lycopersicum PE=3 SV=1	1	3	3	3	2	1	3	3	3	3	3	1	2	1	3	3	3	3	3	1	2	1	3	3	3	3	3	1	5.9	5.9	5.9	65.455	581	581	0	2.612	By matching	By MS/MS	By MS/MS	By MS/MS	By MS/MS	By MS/MS	By MS/MS
327	K4CQ91	K4CQ91	2	2	2	>tr|K4CQ91|K4CQ91_SOLLC Uncharacterized protein OS=Solanum lycopersicum PE=3 SV=1	1	2	2	2	2	2	2	2	2	2	2	2	2	2	2	2	2	2	2	2	2	2	2	2	2	2	2	2	28.3	28.3	28.3	13.477	120	120	0	14.768	By MS/MS	By MS/MS	By MS/MS	By MS/MS	By MS/MS	By MS/MS	By MS/MS
329	K4CQE1	K4CQE1	18	18	15	>tr|K4CQE1|K4CQE1_SOLLC Peroxidase OS=Solanum lycopersicum PE=3 SV=1	1	18	18	15	13	18	16	16	16	15	16	8	13	18	16	16	16	15	16	8	11	15	13	13	13	12	13	6	67	67	58.3	36.726	324	324	0	128.39	By MS/MS	By MS/MS	By MS/MS	By MS/MS	By MS/MS	By MS/MS	By MS/MS
330	K4CQF5;K4CQF4	K4CQF5;K4CQF4	2;1	2;1	2;1	>tr|K4CQF5|K4CQF5_SOLLC Uncharacterized protein OS=Solanum lycopersicum PE=4 SV=1;>tr|K4CQF4|K4CQF4_SOLLC Uncharacterized protein OS=Solanum lycopersicum PE=4 SV=1	2	2	2	2	2	2	2	2	2	2	2	2	2	2	2	2	2	2	2	2	2	2	2	2	2	2	2	2	8.8	8.8	8.8	26.135	239	239;247	0	66.002	By MS/MS	By MS/MS	By MS/MS	By MS/MS	By MS/MS	By MS/MS	By MS/MS
332	K4D3E4;K4CQV5;K4CHR6	K4D3E4;K4CQV5	4;4;1	4;4;1	4;4;1	>tr|K4D3E4|K4D3E4_SOLLC Fructose-bisphosphate aldolase OS=Solanum lycopersicum PE=3 SV=1;>tr|K4CQV5|K4CQV5_SOLLC Fructose-bisphosphate aldolase OS=Solanum lycopersicum PE=3 SV=1	3	4	4	4	3	4	3	3	3	3	2	3	3	4	3	3	3	3	2	3	3	4	3	3	3	3	2	3	15.6	15.6	15.6	38.453	358	358;358;357	0	82.841	By MS/MS	By MS/MS	By MS/MS	By MS/MS	By matching	By MS/MS	By MS/MS
333	Q43497;K4CQW8	Q43497;K4CQW8	12;12	12;12	12;12	>sp|Q43497|MDAR_SOLLC Monodehydroascorbate reductase OS=Solanum lycopersicum GN=AFRR PE=1 SV=1;>tr|K4CQW8|K4CQW8_SOLLC Uncharacterized protein OS=Solanum lycopersicum PE=4 SV=1	2	12	12	12	10	12	9	9	11	12	12	5	10	12	9	9	11	12	12	5	10	12	9	9	11	12	12	5	36	36	36	47.035	433	433;433	0	35.435	By MS/MS	By MS/MS	By MS/MS	By MS/MS	By MS/MS	By MS/MS	By MS/MS
335	K4CRB9	K4CRB9	5	5	5	>tr|K4CRB9|K4CRB9_SOLLC Uncharacterized protein OS=Solanum lycopersicum PE=4 SV=1	1	5	5	5	3	5	4	5	5	5	5	3	3	5	4	5	5	5	5	3	3	5	4	5	5	5	5	3	32.5	32.5	32.5	27.564	255	255	0	16.036	By matching	By MS/MS	By MS/MS	By MS/MS	By MS/MS	By MS/MS	By MS/MS
336	K4CRS5	K4CRS5	3	3	3	>tr|K4CRS5|K4CRS5_SOLLC Uncharacterized protein OS=Solanum lycopersicum PE=4 SV=1	1	3	3	3	2	2	2	2	2	2	2	1	2	2	2	2	2	2	2	1	2	2	2	2	2	2	2	1	12.2	12.2	12.2	37.92	335	335	0	3.4611	By MS/MS	By MS/MS	By matching	By MS/MS	By matching	By matching	By matching
338	K4CSC1	K4CSC1	3	1	1	>tr|K4CSC1|K4CSC1_SOLLC Peroxidase OS=Solanum lycopersicum PE=3 SV=1	1	3	1	1	3	2	2	1	1	2	2	2	1	0	0	0	0	0	0	0	1	0	0	0	0	0	0	0	17.2	8.8	8.8	26.259	250	250	0	5.5371	By MS/MS	By matching	By matching	By matching	By matching	By matching	By matching
342	K4CUL6	K4CUL6	2	2	2	>tr|K4CUL6|K4CUL6_SOLLC Uncharacterized protein OS=Solanum lycopersicum PE=3 SV=1	1	2	2	2	2	2	2	2	2	1	2	2	2	2	2	2	2	1	2	2	2	2	2	2	2	1	2	2	4.7	4.7	4.7	60.088	557	557	0	3.8207	By matching	By matching	By MS/MS	By matching	By matching	By matching	By MS/MS
343	K4CUU2;K4B7V1	K4CUU2	20;2	20;2	18;1	>tr|K4CUU2|K4CUU2_SOLLC Uncharacterized protein OS=Solanum lycopersicum PE=4 SV=1	2	20	20	18	16	18	19	18	17	16	18	17	16	18	19	18	17	16	18	17	14	17	17	16	15	16	16	15	35.2	35.2	31.7	61.8	549	549;547	0	136.96	By MS/MS	By MS/MS	By MS/MS	By MS/MS	By MS/MS	By MS/MS	By MS/MS
344	K4CVC3	K4CVC3	7	7	7	>tr|K4CVC3|K4CVC3_SOLLC Uncharacterized protein OS=Solanum lycopersicum PE=3 SV=1	1	7	7	7	5	6	7	5	6	7	7	7	5	6	7	5	6	7	7	7	5	6	7	5	6	7	7	7	13.8	13.8	13.8	52.038	480	480	0	38.707	By MS/MS	By MS/MS	By MS/MS	By MS/MS	By MS/MS	By MS/MS	By MS/MS
345	K4CVF8	K4CVF8	3	3	3	>tr|K4CVF8|K4CVF8_SOLLC Uncharacterized protein OS=Solanum lycopersicum PE=4 SV=1	1	3	3	3	2	3	3	3	3	3	3	3	2	3	3	3	3	3	3	3	2	3	3	3	3	3	3	3	15.8	15.8	15.8	19.636	183	183	0	18.488	By MS/MS	By MS/MS	By MS/MS	By MS/MS	By MS/MS	By MS/MS	By MS/MS
348	K4CW40;Q645N0	K4CW40	7;1	7;1	7;1	>tr|K4CW40|K4CW40_SOLLC Malate dehydrogenase OS=Solanum lycopersicum PE=3 SV=1	2	7	7	7	5	7	6	6	4	6	4	4	5	7	6	6	4	6	4	4	5	7	6	6	4	6	4	4	35.8	35.8	35.8	35.383	332	332;334	0	29.146	By MS/MS	By MS/MS	By MS/MS	By MS/MS	By MS/MS	By MS/MS	By MS/MS
350	K4CWL0	K4CWL0	8	8	8	>tr|K4CWL0|K4CWL0_SOLLC Uncharacterized protein OS=Solanum lycopersicum PE=3 SV=1	1	8	8	8	8	7	7	8	8	7	7	6	8	7	7	8	8	7	7	6	8	7	7	8	8	7	7	6	20.7	20.7	20.7	49.381	454	454	0	5.477	By MS/MS	By matching	By MS/MS	By MS/MS	By MS/MS	By MS/MS	By matching
351	K4CWP2	K4CWP2	4	4	4	>tr|K4CWP2|K4CWP2_SOLLC Beta-galactosidase OS=Solanum lycopersicum PE=3 SV=1	1	4	4	4	3	4	4	3	3	3	3	3	3	4	4	3	3	3	3	3	3	4	4	3	3	3	3	3	6.5	6.5	6.5	99.8	892	892	0	3.6631	By matching	By MS/MS	By MS/MS	By MS/MS	By MS/MS	By matching	By MS/MS
352	K4CX04	K4CX04	4	4	4	>tr|K4CX04|K4CX04_SOLLC Uncharacterized protein OS=Solanum lycopersicum PE=3 SV=1	1	4	4	4	3	4	1	3	4	4	2	4	3	4	1	3	4	4	2	4	3	4	1	3	4	4	2	4	11.6	11.6	11.6	52.624	483	483	0	12.366	By MS/MS	By matching	By matching	By matching	By MS/MS	By MS/MS	By MS/MS
353	K4CX24	K4CX24	2	2	2	>tr|K4CX24|K4CX24_SOLLC Uncharacterized protein OS=Solanum lycopersicum PE=3 SV=1	1	2	2	2	1	2	1	2	2	2	1	1	1	2	1	2	2	2	1	1	1	2	1	2	2	2	1	1	9.1	9.1	9.1	35.562	319	319	0	12.982	By matching	By MS/MS	By matching	By MS/MS	By MS/MS	By matching	By matching
354	K4CXC8;K4DBE8	K4CXC8	12;1	12;1	12;1	>tr|K4CXC8|K4CXC8_SOLLC Uncharacterized protein OS=Solanum lycopersicum PE=4 SV=1	2	12	12	12	10	11	10	11	12	11	10	12	10	11	10	11	12	11	10	12	10	11	10	11	12	11	10	12	36.6	36.6	36.6	44.208	415	415;387	0	213.16	By MS/MS	By MS/MS	By MS/MS	By MS/MS	By MS/MS	By MS/MS	By MS/MS
355	K4CXN7	K4CXN7	8	8	8	>tr|K4CXN7|K4CXN7_SOLLC Uncharacterized protein OS=Solanum lycopersicum PE=4 SV=1	1	8	8	8	7	8	6	8	8	8	8	7	7	8	6	8	8	8	8	7	7	8	6	8	8	8	8	7	18.6	18.6	18.6	28.376	274	274	0	72.048	By MS/MS	By MS/MS	By MS/MS	By MS/MS	By MS/MS	By MS/MS	By MS/MS
356	K4CYB7;K4AZZ3	K4CYB7	5;1	5;1	5;1	>tr|K4CYB7|K4CYB7_SOLLC Uncharacterized protein OS=Solanum lycopersicum PE=3 SV=1	2	5	5	5	5	5	4	5	5	4	4	4	5	5	4	5	5	4	4	4	5	5	4	5	5	4	4	4	13.8	13.8	13.8	49.47	458	458;481	0	7.3337	By MS/MS	By MS/MS	By matching	By matching	By MS/MS	By matching	By matching
358	K4CZD6	K4CZD6	15	15	15	>tr|K4CZD6|K4CZD6_SOLLC Uncharacterized protein OS=Solanum lycopersicum PE=4 SV=1	1	15	15	15	10	13	11	13	14	14	11	10	10	13	11	13	14	14	11	10	10	13	11	13	14	14	11	10	51.4	51.4	51.4	45.828	416	416	0	71.312	By MS/MS	By MS/MS	By MS/MS	By MS/MS	By MS/MS	By MS/MS	By MS/MS
359	K4D0Y5	K4D0Y5	25	25	25	>tr|K4D0Y5|K4D0Y5_SOLLC Uncharacterized protein OS=Solanum lycopersicum PE=4 SV=1	1	25	25	25	23	25	21	24	24	25	24	21	23	25	21	24	24	25	24	21	23	25	21	24	24	25	24	21	51.7	51.7	51.7	52.566	478	478	0	274.82	By MS/MS	By MS/MS	By MS/MS	By MS/MS	By MS/MS	By MS/MS	By MS/MS
361	K4D1H0	K4D1H0	12	12	6	>tr|K4D1H0|K4D1H0_SOLLC Uncharacterized protein OS=Solanum lycopersicum PE=3 SV=1	1	12	12	6	11	11	11	12	10	11	11	10	11	11	11	12	10	11	11	10	6	5	5	6	4	5	5	4	45.9	45.9	27.4	35.405	329	329	0	177.5	By MS/MS	By MS/MS	By MS/MS	By MS/MS	By MS/MS	By MS/MS	By MS/MS
362	K4D1H1	K4D1H1	6	1	1	>tr|K4D1H1|K4D1H1_SOLLC Uncharacterized protein OS=Solanum lycopersicum PE=3 SV=1	1	6	1	1	5	6	6	6	6	6	6	5	1	1	1	1	1	1	1	0	1	1	1	1	1	1	1	0	25.8	6.8	6.8	34.893	322	322	0	9.436	By matching	By matching	By MS/MS	By MS/MS	By MS/MS	By MS/MS	By MS/MS
363	K4D1N6;K4D1N8;K4D1N1;K4D1M5;K4D1N2	K4D1N6	10;3;3;2;1	8;2;2;2;1	7;2;2;2;1	>tr|K4D1N6|K4D1N6_SOLLC Uncharacterized protein OS=Solanum lycopersicum PE=3 SV=1	5	10	8	7	8	10	10	7	9	9	10	7	6	8	8	5	7	7	8	5	5	7	7	4	6	6	7	4	49.1	38.2	31.4	34.491	322	322;194;216;86;173	0	49.991	By MS/MS	By MS/MS	By MS/MS	By MS/MS	By MS/MS	By MS/MS	By MS/MS
364	K4D1S4	K4D1S4	2	2	2	>tr|K4D1S4|K4D1S4_SOLLC Uncharacterized protein OS=Solanum lycopersicum PE=4 SV=1	1	2	2	2	1	2	2	2	2	1	2	2	1	2	2	2	2	1	2	2	1	2	2	2	2	1	2	2	8.2	8.2	8.2	34.656	316	316	0	1.6006	By MS/MS	By matching	By MS/MS	By matching	By matching	By matching	By MS/MS
365	K4D1T4	K4D1T4	10	10	10	>tr|K4D1T4|K4D1T4_SOLLC Uncharacterized protein OS=Solanum lycopersicum PE=3 SV=1	1	10	10	10	9	9	8	7	8	8	9	2	9	9	8	7	8	8	9	2	9	9	8	7	8	8	9	2	23.8	23.8	23.8	50.493	449	449	0	68.044	By MS/MS	By MS/MS	By MS/MS	By MS/MS	By MS/MS	By MS/MS	By MS/MS
367	K4D1W4;K4D1W3;K4CSC2;K4D1V3;K4D1W6	K4D1W4;K4D1W3	4;4;1;1;1	4;4;1;1;1	3;3;1;1;1	>tr|K4D1W4|K4D1W4_SOLLC Peroxidase OS=Solanum lycopersicum PE=3 SV=1;>tr|K4D1W3|K4D1W3_SOLLC Peroxidase OS=Solanum lycopersicum PE=3 SV=1	5	4	4	3	3	3	2	3	3	3	2	3	3	3	2	3	3	3	2	3	2	2	1	2	2	2	1	2	19.4	19.4	16.9	35.075	319	319;319;178;219;317	0	21.37	By matching	By MS/MS	By MS/MS	By MS/MS	By MS/MS	By MS/MS	By matching
369	K4D2M7	K4D2M7	13	13	12	>tr|K4D2M7|K4D2M7_SOLLC Uncharacterized protein OS=Solanum lycopersicum PE=3 SV=1	1	13	13	12	11	12	13	12	13	13	13	10	11	12	13	12	13	13	13	10	10	11	12	11	12	12	12	9	51.7	51.7	47.1	37.801	344	344	0	137.96	By MS/MS	By MS/MS	By MS/MS	By MS/MS	By MS/MS	By MS/MS	By MS/MS
370	K4D338	K4D338	50	50	36	>tr|K4D338|K4D338_SOLLC Uncharacterized protein OS=Solanum lycopersicum PE=3 SV=1	1	50	50	36	42	47	44	46	44	42	40	38	42	47	44	46	44	42	40	38	29	33	31	32	30	28	27	26	61.6	61.6	46.7	84.724	765	765	0	323.31	By MS/MS	By MS/MS	By MS/MS	By MS/MS	By MS/MS	By MS/MS	By MS/MS
371	K4D358	K4D358	6	6	6	>tr|K4D358|K4D358_SOLLC Uncharacterized protein OS=Solanum lycopersicum PE=4 SV=1	1	6	6	6	3	5	6	5	4	6	6	5	3	5	6	5	4	6	6	5	3	5	6	5	4	6	6	5	17.6	17.6	17.6	49.434	449	449	0	37.404	By MS/MS	By MS/MS	By MS/MS	By MS/MS	By MS/MS	By MS/MS	By MS/MS
372	K4D389	K4D389	3	3	2	>tr|K4D389|K4D389_SOLLC Uncharacterized protein OS=Solanum lycopersicum PE=4 SV=1	1	3	3	2	1	2	2	3	1	3	2	0	1	2	2	3	1	3	2	0	0	1	1	2	1	2	2	0	17.2	17.2	14.6	29.461	267	267	0	9.3747	By MS/MS	By matching	By MS/MS	By MS/MS	By matching	By MS/MS	By matching
374	P43282;K4D3I3;P43281;P43280	P43282;K4D3I3;P43281;P43280	2;2;1;1	2;2;1;1	2;2;1;1	>sp|P43282|METK3_SOLLC S-adenosylmethionine synthase 3 OS=Solanum lycopersicum GN=SAM3 PE=2 SV=1;>tr|K4D3I3|K4D3I3_SOLLC S-adenosylmethionine synthase OS=Solanum lycopersicum PE=3 SV=1;>sp|P43281|METK2_SOLLC S-adenosylmethionine synthase 2 OS=Solanum lycop	4	2	2	2	2	2	2	1	1	1	2	0	2	2	2	1	1	1	2	0	2	2	2	1	1	1	2	0	5.9	5.9	5.9	42.652	390	390;390;393;393	0	4.0197	By matching	By MS/MS	By MS/MS	By matching	By matching	By MS/MS	By matching
375	K4D3L0	K4D3L0	9	6	6	>tr|K4D3L0|K4D3L0_SOLLC Peroxidase OS=Solanum lycopersicum PE=3 SV=1	1	9	6	6	6	9	7	8	9	8	8	6	4	6	4	5	6	5	5	4	4	6	4	5	6	5	5	4	36.8	28.3	28.3	37.287	329	329	0	46.145	By MS/MS	By MS/MS	By MS/MS	By MS/MS	By matching	By matching	By MS/MS
376	K4D3L8;K4D3P2	K4D3L8;K4D3P2	8;6	8;6	6;4	>tr|K4D3L8|K4D3L8_SOLLC Uncharacterized protein OS=Solanum lycopersicum PE=4 SV=1;>tr|K4D3P2|K4D3P2_SOLLC Uncharacterized protein OS=Solanum lycopersicum PE=4 SV=1	2	8	8	6	6	8	6	6	8	6	8	7	6	8	6	6	8	6	8	7	4	6	4	4	6	4	6	5	10.6	10.6	9.3	83.112	771	771;597	0	13.005	By MS/MS	By MS/MS	By matching	By MS/MS	By MS/MS	By MS/MS	By MS/MS
377	K4D3V6	K4D3V6	4	3	3	>tr|K4D3V6|K4D3V6_SOLLC Uncharacterized protein OS=Solanum lycopersicum PE=3 SV=1	1	4	3	3	3	3	4	3	4	3	4	3	3	3	3	2	3	3	3	2	3	3	3	2	3	3	3	2	4.5	3.5	3.5	93.557	848	848	0	2.3426	By matching	By matching	By MS/MS	By MS/MS	By MS/MS	By matching	By MS/MS
379	K4D4G1	K4D4G1	3	3	3	>tr|K4D4G1|K4D4G1_SOLLC Uncharacterized protein OS=Solanum lycopersicum PE=4 SV=1	1	3	3	3	0	2	3	3	0	3	3	0	0	2	3	3	0	3	3	0	0	2	3	3	0	3	3	0	15.8	15.8	15.8	24.863	215	215	0	40.095	By matching	By matching	By MS/MS	By MS/MS	By matching	By MS/MS	By MS/MS
380	K4D4J0;K4D4I8	K4D4J0	18;1	18;1	17;1	>tr|K4D4J0|K4D4J0_SOLLC Pectinesterase OS=Solanum lycopersicum PE=4 SV=1	2	18	18	17	12	17	15	17	17	18	17	17	12	17	15	17	17	18	17	17	11	16	14	16	16	17	17	17	37	37	35.6	61.039	559	559;544	0	174.94	By MS/MS	By MS/MS	By MS/MS	By MS/MS	By MS/MS	By MS/MS	By MS/MS
383	K4D5H3	K4D5H3	4	4	4	>tr|K4D5H3|K4D5H3_SOLLC Peroxidase OS=Solanum lycopersicum PE=3 SV=1	1	4	4	4	4	3	3	4	4	4	4	2	4	3	3	4	4	4	4	2	4	3	3	4	4	4	4	2	14.5	14.5	14.5	37.695	337	337	0	11.43	By MS/MS	By MS/MS	By matching	By matching	By MS/MS	By matching	By MS/MS
385	K4D601;K4C285	K4D601;K4C285	3;2	3;2	3;2	>tr|K4D601|K4D601_SOLLC Uncharacterized protein OS=Solanum lycopersicum PE=4 SV=1;>tr|K4C285|K4C285_SOLLC Uncharacterized protein OS=Solanum lycopersicum PE=4 SV=1	2	3	3	3	0	3	2	3	2	3	2	0	0	3	2	3	2	3	2	0	0	3	2	3	2	3	2	0	9.4	9.4	9.4	51.818	477	477;477	0	6.7662	By matching	By MS/MS	By matching	By MS/MS	By MS/MS	By MS/MS	By matching
386	K4D691	K4D691	4	4	4	>tr|K4D691|K4D691_SOLLC Uncharacterized protein OS=Solanum lycopersicum PE=4 SV=1	1	4	4	4	4	4	3	3	3	3	3	4	4	4	3	3	3	3	3	4	4	4	3	3	3	3	3	4	16.5	16.5	16.5	43.128	413	413	0	89.38	By MS/MS	By MS/MS	By MS/MS	By MS/MS	By MS/MS	By MS/MS	By MS/MS
387	K4D738	K4D738	2	2	2	>tr|K4D738|K4D738_SOLLC Uncharacterized protein OS=Solanum lycopersicum PE=4 SV=1	1	2	2	2	1	2	1	2	2	2	2	2	1	2	1	2	2	2	2	2	1	2	1	2	2	2	2	2	6.4	6.4	6.4	42.633	375	375	0	3.7046	By MS/MS	By MS/MS	By MS/MS	By MS/MS	By MS/MS	By MS/MS	By matching
389	K4D804;K4CDZ1	K4D804	7;1	7;1	7;1	>tr|K4D804|K4D804_SOLLC Uncharacterized protein OS=Solanum lycopersicum PE=4 SV=1	2	7	7	7	6	7	4	6	7	6	6	1	6	7	4	6	7	6	6	1	6	7	4	6	7	6	6	1	15.7	15.7	15.7	62.436	549	549;81	0	7.7948	By MS/MS	By MS/MS	By matching	By MS/MS	By matching	By matching	By matching
391	K4D8S6	K4D8S6	2	2	2	>tr|K4D8S6|K4D8S6_SOLLC Uncharacterized protein OS=Solanum lycopersicum PE=4 SV=1	1	2	2	2	1	0	1	2	2	1	1	1	1	0	1	2	2	1	1	1	1	0	1	2	2	1	1	1	5.8	5.8	5.8	65.694	589	589	0	6.3893	By MS/MS	By matching	By MS/MS	By MS/MS	By MS/MS	By matching	By matching
392	K4D9L5;P27322;K4D473;K4C9W3;K4D9L9;P24629;K4BLR5;K4CB53;W9LEB9;tr|A0A0D2XA80|A0A0D2XA80_FUSO4 Hsp70-like protein OS=Fusarium oxysporum f. sp. lycopersici (strain 4287 / CBS 123668 / FGSC 9935 / NRRL 34936) GN=FOXG_00795 PE=3 SV=1	K4D9L5;P27322;K4D473;K4C9W3;K4D9L9	15;13;13;10;8;7;6;4;1;1	15;13;13;10;8;7;6;4;1;1	2;0;0;0;0;0;0;0;0;0	>tr|K4D9L5|K4D9L5_SOLLC Uncharacterized protein OS=Solanum lycopersicum PE=3 SV=1;>sp|P27322|HSP72_SOLLC Heat shock cognate 70 kDa protein 2 OS=Solanum lycopersicum GN=HSC-2 PE=2 SV=1;>tr|K4D473|K4D473_SOLLC Uncharacterized protein OS=Solanum lycopersicum	10	15	15	2	11	12	11	11	11	12	12	8	11	12	11	11	11	12	12	8	2	1	1	1	1	1	1	1	26.4	26.4	3.2	77.141	698	698;644;644;648;654;650;654;654;652;652	0	64.725	By MS/MS	By MS/MS	By MS/MS	By MS/MS	By MS/MS	By MS/MS	By MS/MS
393	K4D9N3;K4C4B4	K4D9N3	7;3	7;3	6;2	>tr|K4D9N3|K4D9N3_SOLLC Carboxypeptidase OS=Solanum lycopersicum PE=3 SV=1	2	7	7	6	5	6	6	7	7	7	7	6	5	6	6	7	7	7	7	6	4	5	5	6	6	6	6	5	19.6	19.6	16.8	56.373	499	499;504	0	13.408	By MS/MS	By MS/MS	By matching	By MS/MS	By MS/MS	By MS/MS	By MS/MS
394	K4D9N5	K4D9N5	3	3	3	>tr|K4D9N5|K4D9N5_SOLLC Xyloglucan endotransglucosylase/hydrolase OS=Solanum lycopersicum PE=3 SV=1	1	3	3	3	3	3	1	3	3	3	3	2	3	3	1	3	3	3	3	2	3	3	1	3	3	3	3	2	8.8	8.8	8.8	33.983	296	296	0	9.6471	By MS/MS	By MS/MS	By matching	By MS/MS	By MS/MS	By matching	By matching
395	K4D9N7	K4D9N7	5	5	5	>tr|K4D9N7|K4D9N7_SOLLC Uncharacterized protein OS=Solanum lycopersicum PE=4 SV=1	1	5	5	5	2	4	5	5	5	5	5	4	2	4	5	5	5	5	5	4	2	4	5	5	5	5	5	4	18.2	18.2	18.2	43.085	390	390	0	29.533	By MS/MS	By MS/MS	By MS/MS	By MS/MS	By MS/MS	By MS/MS	By MS/MS
396	K4D9Q9	K4D9Q9	2	2	2	>tr|K4D9Q9|K4D9Q9_SOLLC Carboxypeptidase OS=Solanum lycopersicum PE=3 SV=1	1	2	2	2	2	1	2	1	2	2	2	2	2	1	2	1	2	2	2	2	2	1	2	1	2	2	2	2	3.9	3.9	3.9	51.047	460	460	0	1.9427	By MS/MS	By matching	By MS/MS	By MS/MS	By MS/MS	By MS/MS	By MS/MS
397	K4D9R9	K4D9R9	2	2	2	>tr|K4D9R9|K4D9R9_SOLLC Uncharacterized protein OS=Solanum lycopersicum PE=3 SV=1	1	2	2	2	1	2	0	2	2	2	1	2	1	2	0	2	2	2	1	2	1	2	0	2	2	2	1	2	6	6	6	53.092	499	499	0	7.9242	By matching	By MS/MS	By matching	By MS/MS	By MS/MS	By MS/MS	By matching
398	K4DA02	K4DA02	3	3	3	>tr|K4DA02|K4DA02_SOLLC Uncharacterized protein OS=Solanum lycopersicum PE=3 SV=1	1	3	3	3	0	3	2	3	3	3	3	1	0	3	2	3	3	3	3	1	0	3	2	3	3	3	3	1	16.3	16.3	16.3	42.559	380	380	0	31.253	By matching	By MS/MS	By matching	By MS/MS	By MS/MS	By MS/MS	By MS/MS
402	K4DBB0	K4DBB0	20	20	20	>tr|K4DBB0|K4DBB0_SOLLC Uncharacterized protein OS=Solanum lycopersicum PE=4 SV=1	1	20	20	20	17	18	18	18	19	17	18	18	17	18	18	18	19	17	18	18	17	18	18	18	19	17	18	18	67.1	67.1	67.1	27.008	240	240	0	323.31	By MS/MS	By MS/MS	By MS/MS	By MS/MS	By MS/MS	By MS/MS	By MS/MS
403	K4DBC4	K4DBC4	13	13	6	>tr|K4DBC4|K4DBC4_SOLLC Aconitate hydratase OS=Solanum lycopersicum PE=3 SV=1	1	13	13	6	7	11	11	13	11	11	11	8	7	11	11	13	11	11	11	8	3	4	5	6	5	5	5	4	15.7	15.7	6.4	107.15	981	981	0	41.284	By matching	By MS/MS	By MS/MS	By MS/MS	By MS/MS	By MS/MS	By MS/MS
405	K4DBU6	K4DBU6	7	7	7	>tr|K4DBU6|K4DBU6_SOLLC Uncharacterized protein OS=Solanum lycopersicum PE=3 SV=1	1	7	7	7	7	5	5	6	5	5	6	6	7	5	5	6	5	5	6	6	7	5	5	6	5	5	6	6	16.7	16.7	16.7	53.952	496	496	0	39.121	By MS/MS	By MS/MS	By MS/MS	By MS/MS	By MS/MS	By MS/MS	By MS/MS
406	K4DBV2	K4DBV2	4	4	4	>tr|K4DBV2|K4DBV2_SOLLC Uncharacterized protein OS=Solanum lycopersicum PE=4 SV=1	1	4	4	4	4	4	3	4	4	4	4	4	4	4	3	4	4	4	4	4	4	4	3	4	4	4	4	4	6.7	6.7	6.7	68.167	630	630	0	4.9093	By MS/MS	By MS/MS	By MS/MS	By MS/MS	By MS/MS	By MS/MS	By MS/MS
408	K4DC68	K4DC68	7	7	6	>tr|K4DC68|K4DC68_SOLLC Purple acid phosphatase OS=Solanum lycopersicum PE=3 SV=1	1	7	7	6	7	7	7	7	7	7	7	7	7	7	7	7	7	7	7	7	6	6	6	6	6	6	6	6	18.7	18.7	16.8	55.293	477	477	0	35.795	By MS/MS	By MS/MS	By MS/MS	By MS/MS	By MS/MS	By MS/MS	By matching
409	K4DC90;Q10712	K4DC90;Q10712	2;2	1;1	1;1	>tr|K4DC90|K4DC90_SOLLC Uncharacterized protein OS=Solanum lycopersicum PE=4 SV=1;>sp|Q10712|AMPL1_SOLLC Leucine aminopeptidase 1, chloroplastic OS=Solanum lycopersicum GN=LAPA1 PE=1 SV=1	2	2	1	1	1	1	1	2	2	2	2	1	0	0	0	1	1	1	1	0	0	0	0	1	1	1	1	0	5.3	3.1	3.1	57.707	550	550;571	0	5.7049	By matching	By matching	By matching	By MS/MS	By matching	By matching	By matching
410	K4DCS5	K4DCS5	10	10	10	>tr|K4DCS5|K4DCS5_SOLLC Uncharacterized protein OS=Solanum lycopersicum PE=4 SV=1	1	10	10	10	9	10	10	8	8	10	9	9	9	10	10	8	8	10	9	9	9	10	10	8	8	10	9	9	26.3	26.3	26.3	34.98	354	354	0	125.11	By MS/MS	By MS/MS	By MS/MS	By MS/MS	By MS/MS	By MS/MS	By MS/MS
411	K4DCV3	K4DCV3	5	2	2	>tr|K4DCV3|K4DCV3_SOLLC Malate dehydrogenase OS=Solanum lycopersicum PE=3 SV=1	1	5	2	2	4	5	5	4	4	3	4	4	1	2	2	1	2	1	2	2	1	2	2	1	2	1	2	2	17.3	11.1	11.1	35.654	342	342	0	1.507	By matching	By matching	By MS/MS	By matching	By matching	By matching	By matching
414	K4DCX7	K4DCX7	18	18	18	>tr|K4DCX7|K4DCX7_SOLLC Uncharacterized protein OS=Solanum lycopersicum PE=3 SV=1	1	18	18	18	15	17	16	18	18	17	17	17	15	17	16	18	18	17	17	17	15	17	16	18	18	17	17	17	47.5	47.5	47.5	51.456	480	480	0	273.3	By MS/MS	By MS/MS	By MS/MS	By MS/MS	By MS/MS	By MS/MS	By MS/MS
415	K4DCX9	K4DCX9	3	3	3	>tr|K4DCX9|K4DCX9_SOLLC Uncharacterized protein OS=Solanum lycopersicum PE=4 SV=1	1	3	3	3	3	2	3	2	2	2	3	2	3	2	3	2	2	2	3	2	3	2	3	2	2	2	3	2	10	10	10	35.687	320	320	0	3.658	By MS/MS	By MS/MS	By MS/MS	By matching	By matching	By MS/MS	By matching
416	K4DD05	K4DD05	3	3	3	>tr|K4DD05|K4DD05_SOLLC Uncharacterized protein OS=Solanum lycopersicum PE=4 SV=1	1	3	3	3	2	2	2	2	3	2	2	3	2	2	2	2	3	2	2	3	2	2	2	2	3	2	2	3	19.9	19.9	19.9	28.076	267	267	0	17.851	By matching	By MS/MS	By matching	By MS/MS	By matching	By MS/MS	By matching
417	K4DD79	K4DD79	12	12	12	>tr|K4DD79|K4DD79_SOLLC Uncharacterized protein OS=Solanum lycopersicum PE=4 SV=1	1	12	12	12	11	12	9	9	11	11	9	11	11	12	9	9	11	11	9	11	11	12	9	9	11	11	9	11	35.2	35.2	35.2	40.857	369	369	0	141.68	By MS/MS	By MS/MS	By MS/MS	By MS/MS	By MS/MS	By MS/MS	By MS/MS
418	K4DDL2	K4DDL2	4	4	4	>tr|K4DDL2|K4DDL2_SOLLC Uncharacterized protein OS=Solanum lycopersicum PE=3 SV=1	1	4	4	4	3	4	4	3	4	4	4	4	3	4	4	3	4	4	4	4	3	4	4	3	4	4	4	4	14.7	14.7	14.7	52.351	475	475	0	18.274	By MS/MS	By MS/MS	By MS/MS	By MS/MS	By MS/MS	By MS/MS	By MS/MS
420	K4DFE6;P37222;K4DBT1	K4DFE6;P37222;K4DBT1	2;1;1	2;1;1	1;0;0	>tr|K4DFE6|K4DFE6_SOLLC Malic enzyme OS=Solanum lycopersicum PE=3 SV=1;>sp|P37222|MAOC_SOLLC NADP-dependent malic enzyme, chloroplastic (Fragment) OS=Solanum lycopersicum PE=2 SV=1;>tr|K4DBT1|K4DBT1_SOLLC Malic enzyme OS=Solanum lycopersicum PE=3 SV=1	3	2	2	1	1	1	0	2	2	0	0	0	1	1	0	2	2	0	0	0	1	1	0	1	1	0	0	0	5.5	5.5	1.7	70.228	640	640;573;589	0	4.2565	By MS/MS	By matching	By matching	By MS/MS	By matching	By matching	By matching
423	K4DFX0	K4DFX0	2	2	2	>tr|K4DFX0|K4DFX0_SOLLC Uncharacterized protein OS=Solanum lycopersicum PE=4 SV=1	1	2	2	2	0	2	2	2	2	2	1	1	0	2	2	2	2	2	1	1	0	2	2	2	2	2	1	1	10.1	10.1	10.1	24.987	227	227	0.0089286	0.82583	By matching	By MS/MS	By MS/MS	By matching	By matching	By matching	By matching
424	K4DG27	K4DG27	29	29	29	>tr|K4DG27|K4DG27_SOLLC Uncharacterized protein OS=Solanum lycopersicum PE=3 SV=1	1	29	29	29	25	28	24	29	29	27	27	27	25	28	24	29	29	27	27	27	25	28	24	29	29	27	27	27	57.9	57.9	57.9	58.302	516	516	0	323.31	By MS/MS	By MS/MS	By MS/MS	By MS/MS	By MS/MS	By MS/MS	By MS/MS
425	K4DGU7;K4DGU9	K4DGU7	23;1	23;1	22;1	>tr|K4DGU7|K4DGU7_SOLLC Uncharacterized protein OS=Solanum lycopersicum PE=4 SV=1	2	23	23	22	17	21	20	18	21	21	20	17	17	21	20	18	21	21	20	17	16	20	19	18	20	21	19	17	37	37	36	80.991	749	749;69	0	267.64	By MS/MS	By MS/MS	By MS/MS	By MS/MS	By MS/MS	By MS/MS	By MS/MS
426	K4DH18	K4DH18	2	1	1	>tr|K4DH18|K4DH18_SOLLC Uncharacterized protein OS=Solanum lycopersicum PE=4 SV=1	1	2	1	1	2	2	2	2	2	2	2	2	1	1	1	1	1	1	1	1	1	1	1	1	1	1	1	1	4.8	2.9	2.9	61.028	544	544	0	3.6565	By MS/MS	By matching	By matching	By matching	By matching	By matching	By matching
427	P30264;K4DH34	P30264;K4DH34	2;2	2;2	2;2	>sp|P30264|CATA1_SOLLC Catalase isozyme 1 OS=Solanum lycopersicum GN=CAT1 PE=2 SV=1;>tr|K4DH34|K4DH34_SOLLC Catalase OS=Solanum lycopersicum PE=3 SV=1	2	2	2	2	2	2	1	2	2	2	2	2	2	2	1	2	2	2	2	2	2	2	1	2	2	2	2	2	6.1	6.1	6.1	56.505	492	492;492	0	10.277	By MS/MS	By MS/MS	By MS/MS	By matching	By matching	By matching	By matching
428	K4DH42	K4DH42	3	3	3	>tr|K4DH42|K4DH42_SOLLC Uncharacterized protein OS=Solanum lycopersicum PE=3 SV=1	1	3	3	3	3	2	3	2	2	3	3	3	3	2	3	2	2	3	3	3	3	2	3	2	2	3	3	3	14.8	14.8	14.8	37.186	331	331	0	11.502	By MS/MS	By matching	By MS/MS	By MS/MS	By MS/MS	By MS/MS	By MS/MS
429	K4DHE9	K4DHE9	3	3	3	>tr|K4DHE9|K4DHE9_SOLLC Uncharacterized protein OS=Solanum lycopersicum PE=4 SV=1	1	3	3	3	3	3	3	3	3	3	3	3	3	3	3	3	3	3	3	3	3	3	3	3	3	3	3	3	14	14	14	38.038	343	343	0	33.1	By MS/MS	By MS/MS	By MS/MS	By MS/MS	By MS/MS	By MS/MS	By MS/MS
430	K4DHT7	K4DHT7	4	4	4	>tr|K4DHT7|K4DHT7_SOLLC Carboxypeptidase OS=Solanum lycopersicum PE=3 SV=1	1	4	4	4	3	2	3	3	2	4	4	4	3	2	3	3	2	4	4	4	3	2	3	3	2	4	4	4	10.9	10.9	10.9	54.524	479	479	0	28.151	By MS/MS	By MS/MS	By MS/MS	By MS/MS	By MS/MS	By MS/MS	By MS/MS
432	K4DI33;K4D8Y2	K4DI33	16;2	16;2	16;2	>tr|K4DI33|K4DI33_SOLLC Uncharacterized protein OS=Solanum lycopersicum PE=4 SV=1	2	16	16	16	7	15	15	13	14	14	16	8	7	15	15	13	14	14	16	8	7	15	15	13	14	14	16	8	25.3	25.3	25.3	96.225	865	865;863	0	135.87	By MS/MS	By MS/MS	By MS/MS	By MS/MS	By MS/MS	By MS/MS	By MS/MS
433	O04678	O04678	25	25	11	>tr|O04678|O04678_SOLLC P69B protein OS=Solanum lycopersicum GN=P69B PE=2 SV=1	1	25	25	11	12	22	19	23	25	24	22	21	12	22	19	23	25	24	22	21	4	9	6	9	11	10	10	8	47.8	47.8	23.4	78.93	745	745	0	270.35	By MS/MS	By MS/MS	By MS/MS	By MS/MS	By MS/MS	By MS/MS	By MS/MS
434	O49877;P20721	O49877;P20721	7;6	7;6	7;6	>tr|O49877|O49877_SOLLC CYP1 OS=Solanum lycopersicum GN=C14 PE=2 SV=1;>sp|P20721|CYSPL_SOLLC Low-temperature-induced cysteine proteinase (Fragment) OS=Solanum lycopersicum PE=2 SV=1	2	7	7	7	7	7	7	7	7	7	7	7	7	7	7	7	7	7	7	7	7	7	7	7	7	7	7	7	16.3	16.3	16.3	51.141	466	466;346	0	86.501	By MS/MS	By MS/MS	By MS/MS	By MS/MS	By MS/MS	By MS/MS	By MS/MS
437	P04284;Q04108	P04284;Q04108	4;3	4;3	4;3	>sp|P04284|PR06_SOLLC Pathogenesis-related leaf protein 6 OS=Solanum lycopersicum GN=PR1B1 PE=1 SV=2;>sp|Q04108|PR04_SOLLC Pathogenesis-related leaf protein 4 OS=Solanum lycopersicum PE=2 SV=1	2	4	4	4	4	3	3	3	3	3	3	3	4	3	3	3	3	3	3	3	4	3	3	3	3	3	3	3	36.5	36.5	36.5	17.52	159	159;159	0	52.423	By MS/MS	By MS/MS	By MS/MS	By MS/MS	By MS/MS	By MS/MS	By MS/MS
438	P12670	P12670	5	3	3	>sp|P12670|NP24_SOLLC Protein NP24 OS=Solanum lycopersicum PE=1 SV=2	1	5	3	3	4	4	4	5	4	4	3	3	2	2	2	3	2	2	1	1	2	2	2	3	2	2	1	1	23.1	15.8	15.8	26.646	247	247	0	30.95	By matching	By matching	By MS/MS	By MS/MS	By MS/MS	By MS/MS	By MS/MS
439	Q7XAV2;P14831	Q7XAV2;P14831	2;2	2;2	2;2	>tr|Q7XAV2|Q7XAV2_SOLLC Superoxide dismutase [Cu-Zn] OS=Solanum lycopersicum PE=2 SV=1;>sp|P14831|SODCP_SOLLC Superoxide dismutase [Cu-Zn], chloroplastic OS=Solanum lycopersicum GN=SODCP.2 PE=1 SV=1	2	2	2	2	2	2	2	2	2	2	2	2	2	2	2	2	2	2	2	2	2	2	2	2	2	2	2	2	11.1	11.1	11.1	22.282	217	217;217	0	3.2639	By matching	By MS/MS	By MS/MS	By MS/MS	By matching	By matching	By MS/MS
440	P15003	P15003	5	5	4	>sp|P15003|PER1_SOLLC Suberization-associated anionic peroxidase 1 OS=Solanum lycopersicum GN=TAP1 PE=3 SV=1	1	5	5	4	5	4	5	5	5	5	5	5	5	4	5	5	5	5	5	5	4	3	4	4	4	4	4	4	17.3	17.3	13.2	38.749	364	364	0	82.638	By MS/MS	By MS/MS	By MS/MS	By MS/MS	By MS/MS	By MS/MS	By MS/MS
441	P15004	P15004	4	3	3	>sp|P15004|PER2_SOLLC Suberization-associated anionic peroxidase 2 OS=Solanum lycopersicum GN=TAP2 PE=3 SV=1	1	4	3	3	3	4	3	4	4	4	4	4	2	3	2	3	3	3	3	3	2	3	2	3	3	3	3	3	14	9.9	9.9	38.547	363	363	0	5.779	By MS/MS	By MS/MS	By MS/MS	By MS/MS	By MS/MS	By MS/MS	By matching
442	P25306	P25306	6	6	6	>sp|P25306|THD1_SOLLC Threonine dehydratase biosynthetic, chloroplastic OS=Solanum lycopersicum GN=TD PE=1 SV=1	1	6	6	6	2	6	5	6	4	5	4	4	2	6	5	6	4	5	4	4	2	6	5	6	4	5	4	4	16.8	16.8	16.8	64.937	595	595	0	17.334	By matching	By matching	By MS/MS	By MS/MS	By matching	By MS/MS	By MS/MS
443	P26300	P26300	16	16	7	>sp|P26300|ENO_SOLLC Enolase OS=Solanum lycopersicum GN=PGH1 PE=2 SV=1	1	16	16	7	14	16	11	13	14	13	15	10	14	16	11	13	14	13	15	10	7	7	4	5	5	4	6	4	45.9	45.9	22.1	47.798	444	444	0	316.59	By MS/MS	By MS/MS	By MS/MS	By MS/MS	By MS/MS	By MS/MS	By MS/MS
444	P27065;K4D005	P27065	7;1	7;1	7;1	>sp|P27065|RBL_SOLLC Ribulose bisphosphate carboxylase large chain OS=Solanum lycopersicum GN=rbcL PE=1 SV=4	2	7	7	7	3	5	4	5	3	4	4	2	3	5	4	5	3	4	4	2	3	5	4	5	3	4	4	2	15.5	15.5	15.5	52.954	477	477;73	0	6.6712	By MS/MS	By MS/MS	By MS/MS	By MS/MS	By MS/MS	By MS/MS	By MS/MS
445	P32045	P32045	3	3	3	>sp|P32045|PRP2_SOLLC Pathogenesis-related protein P2 OS=Solanum lycopersicum PE=2 SV=1	1	3	3	3	2	3	3	3	3	3	3	2	2	3	3	3	3	3	3	2	2	3	3	3	3	3	3	2	30.1	30.1	30.1	16.026	143	143	0	62.111	By MS/MS	By MS/MS	By MS/MS	By MS/MS	By matching	By MS/MS	By MS/MS
446	Q01413	Q01413	6	6	6	>sp|Q01413|E13B_SOLLC Glucan endo-1,3-beta-glucosidase B OS=Solanum lycopersicum PE=2 SV=1	1	6	6	6	4	5	4	6	5	6	6	4	4	5	4	6	5	6	6	4	4	5	4	6	5	6	6	4	17.8	17.8	17.8	39.719	360	360	0	12.734	By MS/MS	By MS/MS	By MS/MS	By MS/MS	By MS/MS	By MS/MS	By MS/MS
447	Q05538;K4D1G8;K4D1M8	Q05538	10;2;1	4;0;0	4;0;0	>sp|Q05538|CHIC_SOLLC Basic 30 kDa endochitinase OS=Solanum lycopersicum GN=CHI9 PE=1 SV=1	3	10	4	4	9	10	9	9	10	9	9	9	4	4	3	3	4	3	3	3	4	4	3	3	4	3	3	3	43.2	17.4	17.4	34.345	322	322;170;154	0	25.496	By MS/MS	By MS/MS	By MS/MS	By MS/MS	By MS/MS	By MS/MS	By MS/MS
448	Q05539	Q05539	8	8	8	>sp|Q05539|CHIA_SOLLC Acidic 26 kDa endochitinase OS=Solanum lycopersicum GN=CHI3 PE=1 SV=1	1	8	8	8	7	7	6	8	7	8	7	6	7	7	6	8	7	8	7	6	7	7	6	8	7	8	7	6	59.3	59.3	59.3	27.632	253	253	0	172.11	By MS/MS	By MS/MS	By MS/MS	By MS/MS	By MS/MS	By MS/MS	By MS/MS
449	Q05540	Q05540	6	6	6	>sp|Q05540|CHIB_SOLLC Acidic 27 kDa endochitinase OS=Solanum lycopersicum GN=CHI17 PE=1 SV=1	1	6	6	6	4	6	5	4	5	6	6	6	4	6	5	4	5	6	6	6	4	6	5	4	5	6	6	6	24.3	24.3	24.3	26.583	247	247	0	42.572	By MS/MS	By MS/MS	By MS/MS	By MS/MS	By MS/MS	By MS/MS	By MS/MS
451	Q15I66	Q15I66	2	2	2	>tr|Q15I66|Q15I66_SOLLC Glucose-1-phosphate adenylyltransferase OS=Solanum lycopersicum GN=AgpL1 PE=3 SV=1	1	2	2	2	2	2	1	2	2	1	1	1	2	2	1	2	2	1	1	1	2	2	1	2	2	1	1	1	3.2	3.2	3.2	58.151	524	524	0.0023529	0.9961	By matching	By MS/MS	By matching	By MS/MS	By matching	By matching	By matching
452	Q1PCD2	Q1PCD2	2	2	2	>tr|Q1PCD2|Q1PCD2_SOLLC Glucose-6-phosphate isomerase OS=Solanum lycopersicum GN=GPI PE=2 SV=1	1	2	2	2	2	2	2	2	2	2	2	2	2	2	2	2	2	2	2	2	2	2	2	2	2	2	2	2	4.6	4.6	4.6	62.778	568	568	0	29.258	By matching	By MS/MS	By MS/MS	By MS/MS	By MS/MS	By MS/MS	By MS/MS
453	Q40143	Q40143	7	7	7	>sp|Q40143|CYSP3_SOLLC Cysteine proteinase 3 OS=Solanum lycopersicum GN=CYP-3 PE=2 SV=1	1	7	7	7	6	7	6	6	6	6	7	7	6	7	6	6	6	6	7	7	6	7	6	6	6	6	7	7	19.4	19.4	19.4	38.944	356	356	0	27.867	By MS/MS	By MS/MS	By MS/MS	By MS/MS	By MS/MS	By MS/MS	By MS/MS
454	Q40144	Q40144	2	2	1	>sp|Q40144|XTH1_SOLLC Probable xyloglucan endotransglucosylase/hydrolase 1 OS=Solanum lycopersicum GN=XTH1 PE=2 SV=1	1	2	2	1	2	1	2	2	1	2	1	2	2	1	2	2	1	2	1	2	1	1	1	1	1	1	1	1	10.1	10.1	4.7	34.01	296	296	0	1.6361	By MS/MS	By matching	By MS/MS	By matching	By matching	By matching	By matching
455	Q42871	Q42871	3	3	3	>tr|Q42871|Q42871_SOLLC Endoglucanase OS=Solanum lycopersicum GN=Cel1 PE=2 SV=1	1	3	3	3	2	2	2	2	2	1	2	3	2	2	2	2	2	1	2	3	2	2	2	2	2	1	2	3	7.6	7.6	7.6	55.277	501	501	0.0023474	0.99265	By matching	By matching	By matching	By MS/MS	By matching	By matching	By MS/MS
456	Q42896;K4BCU7	Q42896	9;1	9;1	9;1	>sp|Q42896|SCRK2_SOLLC Fructokinase-2 OS=Solanum lycopersicum GN=FRK2 PE=2 SV=2	2	9	9	9	8	8	9	8	9	7	8	8	8	8	9	8	9	7	8	8	8	8	9	8	9	7	8	8	36	36	36	34.763	328	328;389	0	82.094	By MS/MS	By MS/MS	By MS/MS	By MS/MS	By MS/MS	By MS/MS	By MS/MS
457	Q49B52	Q49B52	2	2	2	>tr|Q49B52|Q49B52_SOLLC Monodehydroascorbate reductase OS=Solanum lycopersicum GN=MDHAR PE=2 SV=2	1	2	2	2	0	2	2	2	2	2	2	0	0	2	2	2	2	2	2	0	0	2	2	2	2	2	2	0	7.3	7.3	7.3	52.546	482	482	0	4.1506	By matching	By MS/MS	By matching	By matching	By matching	By matching	By MS/MS
459	Q7YK44;K4C589	Q7YK44	6;2	6;2	6;2	>tr|Q7YK44|Q7YK44_SOLLC Superoxide dismutase OS=Solanum lycopersicum GN=sodb PE=2 SV=1	2	6	6	6	1	6	4	4	5	6	5	1	1	6	4	4	5	6	5	1	1	6	4	4	5	6	5	1	24.9	24.9	24.9	27.91	249	249;160	0	38.96	By matching	By MS/MS	By MS/MS	By MS/MS	By matching	By MS/MS	By MS/MS
460	Q8GT30;K4DHT1	Q8GT30;K4DHT1	4;2	4;2	4;2	>tr|Q8GT30|Q8GT30_SOLLC Dihydrolipoyl dehydrogenase OS=Solanum lycopersicum PE=2 SV=1;>tr|K4DHT1|K4DHT1_SOLLC Dihydrolipoyl dehydrogenase OS=Solanum lycopersicum PE=4 SV=1	2	4	4	4	3	4	3	3	4	3	4	3	3	4	3	3	4	3	4	3	3	4	3	3	4	3	4	3	8.2	8.2	8.2	52.81	500	500;504	0	3.6712	By matching	By MS/MS	By MS/MS	By MS/MS	By MS/MS	By MS/MS	By matching
461	Q8GZD8;Q42876	Q8GZD8;Q42876	21;20	21;20	20;19	>tr|Q8GZD8|Q8GZD8_SOLLC Neutral leucine aminopeptidase preprotein OS=Solanum lycopersicum GN=LapN PE=2 SV=1;>sp|Q42876|AMPL2_SOLLC Leucine aminopeptidase 2, chloroplastic OS=Solanum lycopersicum GN=LAPA2 PE=2 SV=1	2	21	21	20	15	19	18	19	20	20	19	17	15	19	18	19	20	20	19	17	14	18	17	18	19	19	18	16	46.8	46.8	44.7	60.28	577	577;569	0	140.84	By MS/MS	By MS/MS	By MS/MS	By MS/MS	By MS/MS	By MS/MS	By MS/MS
462	Q8LPU1	Q8LPU1	6	3	3	>tr|Q8LPU1|Q8LPU1_SOLLC PR-5x OS=Solanum lycopersicum GN=PR-5 PE=2 SV=1	1	6	3	3	5	3	3	4	5	5	6	5	3	1	1	2	3	3	3	3	3	1	1	2	3	3	3	3	38.9	25.2	25.2	24.59	226	226	0	78.591	By MS/MS	By MS/MS	By MS/MS	By MS/MS	By MS/MS	By MS/MS	By MS/MS
463	Q8S333	Q8S333	4	4	4	>tr|Q8S333|Q8S333_SOLLC Cysteine protease OS=Solanum lycopersicum GN=Rcr3 PE=3 SV=1	1	4	4	4	4	4	3	4	4	4	4	4	4	4	3	4	4	4	4	4	4	4	3	4	4	4	4	4	12.8	12.8	12.8	38.518	345	345	0	21.022	By MS/MS	By MS/MS	By MS/MS	By MS/MS	By MS/MS	By MS/MS	By MS/MS
464	Q944F3;K4D250;REV__K4CRS1;REV__K4B979	Q944F3	34;2;1;1	34;2;1;1	34;2;1;1	>tr|Q944F3|Q944F3_SOLLC Arabinosidase ARA-1 OS=Solanum lycopersicum PE=2 SV=1	4	34	34	34	28	32	28	31	31	31	32	28	28	32	28	31	31	31	32	28	28	32	28	31	31	31	32	28	45.4	45.4	45.4	74.231	674	674;670;808;954	0	245.41	By MS/MS	By MS/MS	By MS/MS	By MS/MS	By MS/MS	By MS/MS	By MS/MS
465	Q9FZ05	Q9FZ05	4	4	4	>tr|Q9FZ05|Q9FZ05_SOLLC Xyloglucan endotransglucosylase/hydrolase OS=Solanum lycopersicum GN=LeXET2 PE=2 SV=1	1	4	4	4	2	4	3	4	3	3	4	2	2	4	3	4	3	3	4	2	2	4	3	4	3	3	4	2	19.3	19.3	19.3	31.586	275	275	0	27.027	By MS/MS	By MS/MS	By matching	By MS/MS	By MS/MS	By MS/MS	By MS/MS
467	Q9ZS44;K4AYH4;K4AYH0	Q9ZS44;K4AYH4;K4AYH0	6;5;4	4;3;2	1;0;0	>tr|Q9ZS44|Q9ZS44_SOLLC SBT4B protein OS=Solanum lycopersicum GN=sbt4b PE=4 SV=1;>tr|K4AYH4|K4AYH4_SOLLC Uncharacterized protein OS=Solanum lycopersicum PE=4 SV=1;>tr|K4AYH0|K4AYH0_SOLLC Uncharacterized protein OS=Solanum lycopersicum PE=4 SV=1	3	6	4	1	5	4	4	4	5	4	4	6	3	2	2	2	3	2	2	4	1	1	1	1	1	1	1	1	9.1	7.9	2.4	84.914	777	777;763;779	0	6.7583	By matching	By matching	By MS/MS	By MS/MS	By MS/MS	By MS/MS	By MS/MS
[truncated: 58 more columns]

## Sheet: proteinGroups
Protein IDs	Majority protein IDs	Peptide counts (all)	Peptide counts (razor+unique)	Peptide counts (unique)	Fasta headers	Number of proteins	Peptides	Razor + unique peptides	Unique peptides	Peptides FR36_Mock_i2S1	Peptides FR37_Mock_i2S2	Peptides FR38_Mock_i2S3	Peptides FR39_Mock_i2S4	Peptides FR40_Fol007_i2S1	Peptides FR41_Fol007_i2S2	Peptides FR42_Fol007_i2S3	Peptides FR43_Fol007_i2S4	Razor + unique peptides FR36_Mock_i2S1	Razor + unique peptides FR37_Mock_i2S2	Razor + unique peptides FR38_Mock_i2S3	Razor + unique peptides FR39_Mock_i2S4	Razor + unique peptides FR40_Fol007_i2S1	Razor + unique peptides FR41_Fol007_i2S2	Razor + unique peptides FR42_Fol007_i2S3	Razor + unique peptides FR43_Fol007_i2S4	Unique peptides FR36_Mock_i2S1	Unique peptides FR37_Mock_i2S2	Unique peptides FR38_Mock_i2S3	Unique peptides FR39_Mock_i2S4	Unique peptides FR40_Fol007_i2S1	Unique peptides FR41_Fol007_i2S2	Unique peptides FR42_Fol007_i2S3	Unique peptides FR43_Fol007_i2S4	Sequence coverage [%]	Unique + razor sequence coverage [%]	Unique sequence coverage [%]	Mol. weight [kDa]	Sequence length	Sequence lengths	Q-value	Score	Identification type FR36_Mock_i2S1	Identification type FR37_Mock_i2S2	Identification type FR38_Mock_i2S3	Identification type FR39_Mock_i2S4	Identification type FR40_Fol007_i2S1	Identification type FR41_Fol007_i2S2	Identification type FR42_Fol007_i2S3	Identification type FR43_Fol007_i2S4
A7X331	A7X331	9	9	9	>tr|A7X331|A7X331_SOLLC Expansin-like protein OS=Solanum lycopersicum GN=EXLA1 PE=2 SV=1	1	9	9	9	8	9	8	8	8	8	7	8	8	9	8	8	8	8	7	8	8	9	8	8	8	8	7	8	29.1	29.1	29.1	28.311	261	261	0	53.388	By MS/MS	By MS/MS	By MS/MS	By MS/MS	By MS/MS	By MS/MS	By MS/MS	By MS/MS
B1Q3F1;K4C284;B1Q3F2;K4BQZ8;P54767;B1Q3F0	B1Q3F1	11;5;3;3;2;2	11;5;3;3;2;2	11;5;3;3;2;2	>tr|B1Q3F1|B1Q3F1_SOLLC Glutamate decarboxylase OS=Solanum lycopersicum GN=LeGAD2 PE=2 SV=1	6	11	11	11	8	11	8	10	9	9	8	7	8	11	8	10	9	9	8	7	8	11	8	10	9	9	8	7	24.9	24.9	24.9	56.957	503	503;497;484;493;502;502	0	107.59	By MS/MS	By MS/MS	By MS/MS	By MS/MS	By MS/MS	By MS/MS	By MS/MS	By MS/MS
B2LW68;Q08697;K4B2M8	B2LW68;Q08697;K4B2M8	2;1;1	2;1;1	2;1;1	>tr|B2LW68|B2LW68_SOLLC PR1 protein OS=Solanum lycopersicum PE=2 SV=1;>sp|Q08697|PR1A_SOLLC Pathogenesis-related protein 1A1 OS=Solanum lycopersicum PE=2 SV=1;>tr|K4B2M8|K4B2M8_SOLLC Uncharacterized protein OS=Solanum lycopersicum PE=3 SV=1	3	2	2	2	1	2	2	2	2	2	2	1	1	2	2	2	2	2	2	1	1	2	2	2	2	2	2	1	12.8	12.8	12.8	20.123	179	179;175;176	0	20.119	By MS/MS	By MS/MS	By matching	By matching	By matching	By matching	By MS/MS	By matching
B5M9E5	B5M9E5	3	3	3	>tr|B5M9E5|B5M9E5_SOLLC Beta-glucosidase 08 OS=Solanum lycopersicum PE=2 SV=1	1	3	3	3	2	3	2	0	1	1	0	1	2	3	2	0	1	1	0	1	2	3	2	0	1	1	0	1	8.9	8.9	8.9	50.921	459	459	0	3.5651	By MS/MS	By MS/MS	By matching	By matching	By matching	By matching	By matching	By matching
C5IU71	C5IU71	6	6	6	>tr|C5IU71|C5IU71_SOLLC Chloroplast sedoheptulose-1,7-bisphosphatase OS=Solanum lycopersicum GN=SBPase PE=2 SV=1	1	6	6	6	3	3	2	6	4	6	5	3	3	3	2	6	4	6	5	3	3	3	2	6	4	6	5	3	15.2	15.2	15.2	42.587	394	394	0	7.964	By MS/MS	By matching	By MS/MS	By MS/MS	By matching	By matching	By MS/MS	By MS/MS
CON__sp|P00760|TRY1_BOVIN	CON__sp|P00760|TRY1_BOVIN	8	8	8	>sp|P00760|TRY1_BOVIN Cationic trypsin OS=Bos taurus GN=Trp1 PE=1 SV=3	1	8	8	8	5	6	5	6	5	6	6	5	5	6	5	6	5	6	6	5	5	6	5	6	5	6	6	5	38.2	38.2	38.2	25.785	246	246	0	77.555	By MS/MS	By MS/MS	By MS/MS	By MS/MS	By MS/MS	By MS/MS	By MS/MS	By MS/MS
CON__sp|P02533|K1C14_HUMAN	CON__sp|P02533|K1C14_HUMAN	8	4	2	>sp|P02533|K1C14_HUMAN Keratin, type I cytoskeletal 14 OS=Homo sapiens GN=KRT14 PE=1 SV=4	1	8	4	2	7	7	8	6	7	7	7	7	3	3	4	2	3	3	3	3	2	2	2	2	2	2	2	2	16.3	11	5.9	51.561	472	472	0	13.415	By MS/MS	By MS/MS	By MS/MS	By matching	By MS/MS	By MS/MS	By matching	By MS/MS
CON__sp|P04259|K2C6B_HUMAN;CON__sp|P48668|K2C6C_HUMAN;CON__sp|P02538|K2C6A_HUMAN	CON__sp|P04259|K2C6B_HUMAN;CON__sp|P48668|K2C6C_HUMAN;CON__sp|P02538|K2C6A_HUMAN	8;7;7	4;4;4	2;2;2	>sp|P04259|K2C6B_HUMAN Keratin, type II cytoskeletal 6B OS=Homo sapiens GN=KRT6B PE=1 SV=5;>sp|P48668|K2C6C_HUMAN Keratin, type II cytoskeletal 6C OS=Homo sapiens GN=KRT6C PE=1 SV=3;>sp|P02538|K2C6A_HUMAN Keratin, type II cytoskeletal 6A OS=Homo sapiens GN	3	8	4	2	6	8	8	6	8	8	8	7	3	4	4	3	4	4	4	4	2	2	2	1	2	2	2	2	14.5	7.3	4.3	60.066	564	564;564;564	0	6.0914	By MS/MS	By matching	By MS/MS	By matching	By matching	By MS/MS	By MS/MS	By matching
CON__sp|P04264|K2C1_HUMAN	CON__sp|P04264|K2C1_HUMAN	33	33	28	>sp|P04264|K2C1_HUMAN Keratin, type II cytoskeletal 1 OS=Homo sapiens GN=KRT1 PE=1 SV=6	1	33	33	28	28	28	31	28	31	30	29	30	28	28	31	28	31	30	29	30	23	24	27	23	26	25	24	25	44.7	44.7	39.6	66.038	644	644	0	323.31	By MS/MS	By MS/MS	By MS/MS	By MS/MS	By MS/MS	By MS/MS	By MS/MS	By MS/MS
CON__sp|P08779|K1C16_HUMAN	CON__sp|P08779|K1C16_HUMAN	7	1	1	>sp|P08779|K1C16_HUMAN Keratin, type I cytoskeletal 16 OS=Homo sapiens GN=KRT16 PE=1 SV=4	1	7	1	1	6	6	7	4	6	6	6	6	1	1	1	0	1	1	1	1	1	1	1	0	1	1	1	1	12.1	1.7	1.7	51.267	473	473	0.0023041	0.96818	By matching	By matching	By matching	By matching	By MS/MS	By matching	By matching	By matching
CON__sp|P13645|K1C10_HUMAN;CON__sp|Q14525|KT33B_HUMAN;CON__sp|Q15323|K1H1_HUMAN;CON__sp|Q14532|K1H2_HUMAN;CON__sp|Q92764|KRT35_HUMAN	CON__sp|P13645|K1C10_HUMAN	27;1;1;1;1	27;1;1;1;1	23;0;0;0;0	>sp|P13645|K1C10_HUMAN Keratin, type I cytoskeletal 10 OS=Homo sapiens GN=KRT10 PE=1 SV=6	5	27	27	23	22	23	24	24	24	22	22	22	22	23	24	24	24	22	22	22	18	19	20	20	20	18	18	18	55.8	55.8	51.5	58.826	584	584;404;416;448;455	0	253.36	By MS/MS	By MS/MS	By MS/MS	By MS/MS	By MS/MS	By MS/MS	By MS/MS	By MS/MS
CON__sp|P13647|K2C5_HUMAN;CON__sp|O43790|KRT86_HUMAN;CON__sp|P78385|KRT83_HUMAN;CON__sp|Q14533|KRT81_HUMAN;CON__sp|P78386|KRT85_HUMAN;CON__sp|Q9NSB2|KRT84_HUMAN	CON__sp|P13647|K2C5_HUMAN	7;1;1;1;1;1	3;0;0;0;0;0	3;0;0;0;0;0	>sp|P13647|K2C5_HUMAN Keratin, type II cytoskeletal 5 OS=Homo sapiens GN=KRT5 PE=1 SV=3	6	7	3	3	5	6	7	4	5	6	6	5	2	2	3	1	1	2	2	1	2	2	3	1	1	2	2	1	11.5	4.9	4.9	62.378	590	590;486;493;505;507;600	0	9.7798	By matching	By matching	By MS/MS	By MS/MS	By MS/MS	By MS/MS	By MS/MS	By matching
CON__sp|P35527|K1C9_HUMAN	CON__sp|P35527|K1C9_HUMAN	22	21	21	>sp|P35527|K1C9_HUMAN Keratin, type I cytoskeletal 9 OS=Homo sapiens GN=KRT9 PE=1 SV=3	1	22	21	21	17	17	18	19	21	21	17	18	16	16	17	18	20	20	16	17	16	16	17	18	20	20	16	17	47.5	47.5	47.5	62.064	623	623	0	278.15	By MS/MS	By MS/MS	By MS/MS	By MS/MS	By MS/MS	By MS/MS	By MS/MS	By MS/MS
CON__sp|P35908|K22E_HUMAN	CON__sp|P35908|K22E_HUMAN	18	16	14	>sp|P35908|K22E_HUMAN Keratin, type II cytoskeletal 2 epidermal OS=Homo sapiens GN=KRT2 PE=1 SV=2	1	18	16	14	15	14	14	11	15	15	15	13	13	12	12	9	13	13	13	11	12	10	10	8	11	11	11	10	35.4	32.2	29	65.432	639	639	0	98.658	By MS/MS	By MS/MS	By MS/MS	By MS/MS	By MS/MS	By MS/MS	By MS/MS	By MS/MS
D3TI69	D3TI69	9	9	9	>tr|D3TI69|D3TI69_SOLLC Beta-hexosaminidase OS=Solanum lycopersicum PE=2 SV=1	1	9	9	9	8	9	8	6	8	9	8	8	8	9	8	6	8	9	8	8	8	9	8	6	8	9	8	8	18.1	18.1	18.1	64.023	575	575	0	57.242	By MS/MS	By MS/MS	By MS/MS	By MS/MS	By MS/MS	By MS/MS	By MS/MS	By MS/MS
E0XN34;K4BAN8	E0XN34	24;1	24;1	24;1	>tr|E0XN34|E0XN34_SOLLC Alpha-mannosidase OS=Solanum lycopersicum PE=2 SV=1	2	24	24	24	10	23	21	22	23	22	22	8	10	23	21	22	23	22	22	8	10	23	21	22	23	22	22	8	27	27	27	116.48	1028	1028;1009	0	155.65	By MS/MS	By MS/MS	By MS/MS	By MS/MS	By MS/MS	By MS/MS	By MS/MS	By MS/MS
E3UVW7;K4D6Q8;K4D6Q4;K4BVG3	E3UVW7	30;1;1;1	30;1;1;1	30;1;1;1	>tr|E3UVW7|E3UVW7_SOLLC Beta-galactosidase OS=Solanum lycopersicum PE=2 SV=3	4	30	30	30	25	28	27	28	29	29	28	27	25	28	27	28	29	29	28	27	25	28	27	28	29	29	28	27	41.8	41.8	41.8	93.212	852	852;33;695;735	0	240.9	By MS/MS	By MS/MS	By MS/MS	By MS/MS	By MS/MS	By MS/MS	By MS/MS	By MS/MS
H1AC32;K4BTS4	H1AC32	11;1	11;1	11;1	>tr|H1AC32|H1AC32_SOLLC SlArf protein ( Xyl3protein ) OS=Solanum lycopersicum GN=SlArf PE=2 SV=1	2	11	11	11	2	9	11	8	8	7	9	6	2	9	11	8	8	7	9	6	2	9	11	8	8	7	9	6	14.8	14.8	14.8	85.487	777	777;772	0	16.362	By matching	By MS/MS	By MS/MS	By MS/MS	By MS/MS	By MS/MS	By MS/MS	By matching
H1ZXA9	H1ZXA9	12	2	2	>tr|H1ZXA9|H1ZXA9_SOLLC Heat shock protein 70 isoform 3 OS=Solanum lycopersicum GN=hsc70.3 PE=2 SV=1	1	12	2	2	8	10	9	8	8	9	10	6	1	1	1	1	1	1	1	1	1	1	1	1	1	1	1	1	22.3	3.7	3.7	71.389	651	651	0	7.4109	By MS/MS	By matching	By MS/MS	By matching	By matching	By matching	By MS/MS	By matching
K4ASC1	K4ASC1	1	1	1	>tr|K4ASC1|K4ASC1_SOLLC Uncharacterized protein OS=Solanum lycopersicum PE=4 SV=1	1	1	1	1	1	1	0	1	1	1	1	1	1	1	0	1	1	1	1	1	1	1	0	1	1	1	1	1	2.8	2.8	2.8	48.051	426	426	0	2.2459	By MS/MS	By matching	By matching	By matching	By matching	By matching	By matching	By matching
K4ASJ5	K4ASJ5	11	11	10	>tr|K4ASJ5|K4ASJ5_SOLLC Peroxidase OS=Solanum lycopersicum PE=3 SV=1	1	11	11	10	9	11	10	10	11	11	11	8	9	11	10	10	11	11	11	8	8	10	9	9	10	10	10	7	44	44	44	35.818	327	327	0	89.911	By MS/MS	By MS/MS	By MS/MS	By MS/MS	By MS/MS	By MS/MS	By MS/MS	By MS/MS
K4ASJ6	K4ASJ6	9	8	8	>tr|K4ASJ6|K4ASJ6_SOLLC Peroxidase OS=Solanum lycopersicum PE=3 SV=1	1	9	8	8	7	9	9	9	7	8	7	8	6	8	8	8	6	7	6	7	6	8	8	8	6	7	6	7	35.7	30.2	30.2	34.954	325	325	0	130.11	By MS/MS	By MS/MS	By MS/MS	By MS/MS	By MS/MS	By MS/MS	By MS/MS	By MS/MS
K4ASK1	K4ASK1	1	1	1	>tr|K4ASK1|K4ASK1_SOLLC Uncharacterized protein OS=Solanum lycopersicum PE=4 SV=1	1	1	1	1	1	0	1	1	1	1	1	0	1	0	1	1	1	1	1	0	1	0	1	1	1	1	1	0	1.5	1.5	1.5	128.36	1123	1123	0.0023923	1.0384	By matching	By matching	By MS/MS	By matching	By matching	By matching	By MS/MS	By matching
K4ASX2	K4ASX2	3	2	2	>tr|K4ASX2|K4ASX2_SOLLC Uncharacterized protein OS=Solanum lycopersicum PE=4 SV=1	1	3	2	2	3	3	3	2	1	2	1	1	2	2	2	1	1	1	1	1	2	2	2	1	1	1	1	1	14.2	11.6	11.6	29.259	267	267	0	3.3676	By MS/MS	By matching	By matching	By matching	By matching	By matching	By matching	By matching
Q01412;K4AT60;K4AT59	Q01412;K4AT60	13;13;1	13;13;1	13;13;1	>sp|Q01412|E13A_SOLLC Glucan endo-1,3-beta-glucosidase A OS=Solanum lycopersicum PE=1 SV=1;>tr|K4AT60|K4AT60_SOLLC Uncharacterized protein OS=Solanum lycopersicum PE=3 SV=1	3	13	13	13	8	12	10	11	13	11	12	7	8	12	10	11	13	11	12	7	8	12	10	11	13	11	12	7	40.8	40.8	40.8	37.571	336	336;336;348	0	53.667	By MS/MS	By MS/MS	By MS/MS	By MS/MS	By MS/MS	By MS/MS	By MS/MS	By MS/MS
K4ATB4	K4ATB4	17	3	3	>tr|K4ATB4|K4ATB4_SOLLC Uncharacterized protein OS=Solanum lycopersicum PE=3 SV=1	1	17	3	3	13	16	15	16	16	15	16	13	0	2	2	2	2	1	3	1	0	2	2	2	2	1	3	1	24	6.2	6.2	90.656	817	817	0.0023148	0.97085	By matching	By MS/MS	By matching	By MS/MS	By matching	By matching	By MS/MS	By matching
K4ATJ4	K4ATJ4	3	3	3	>tr|K4ATJ4|K4ATJ4_SOLLC Peptidyl-prolyl cis-trans isomerase OS=Solanum lycopersicum PE=3 SV=1	1	3	3	3	1	3	2	3	3	3	3	0	1	3	2	3	3	3	3	0	1	3	2	3	3	3	3	0	19	19	19	26.535	248	248	0	25.38	By matching	By MS/MS	By MS/MS	By MS/MS	By matching	By MS/MS	By MS/MS	By matching
K4ATR4;K4ATR5	K4ATR4	3;1	3;1	3;1	>tr|K4ATR4|K4ATR4_SOLLC Carboxypeptidase OS=Solanum lycopersicum PE=3 SV=1	2	3	3	3	2	3	0	2	2	3	1	2	2	3	0	2	2	3	1	2	2	3	0	2	2	3	1	2	8.6	8.6	8.6	54.98	490	490;420	0	2.8145	By MS/MS	By MS/MS	By matching	By matching	By matching	By MS/MS	By matching	By MS/MS
K4ATR8	K4ATR8	1	1	1	>tr|K4ATR8|K4ATR8_SOLLC Uncharacterized protein OS=Solanum lycopersicum PE=4 SV=1	1	1	1	1	1	1	0	1	1	1	1	0	1	1	0	1	1	1	1	0	1	1	0	1	1	1	1	0	4.6	4.6	4.6	37.591	327	327	0	1.773	By matching	By matching	By matching	By matching	By matching	By matching	By MS/MS	By matching
K4AUE2;K4AW60	K4AUE2	15;1	15;1	14;0	>tr|K4AUE2|K4AUE2_SOLLC Peroxidase OS=Solanum lycopersicum PE=3 SV=1	2	15	15	14	10	12	13	13	12	12	13	13	10	12	13	13	12	12	13	13	9	11	12	12	11	11	12	12	41.2	41.2	41.2	35.838	330	330;332	0	236.73	By MS/MS	By MS/MS	By MS/MS	By MS/MS	By MS/MS	By MS/MS	By MS/MS	By MS/MS
K4AV63	K4AV63	1	1	1	>tr|K4AV63|K4AV63_SOLLC Uncharacterized protein OS=Solanum lycopersicum PE=3 SV=1	1	1	1	1	0	1	0	1	1	1	1	0	0	1	0	1	1	1	1	0	0	1	0	1	1	1	1	0	1.8	1.8	1.8	62.991	599	599	0	1.3914	By matching	By matching	By matching	By matching	By MS/MS	By matching	By MS/MS	By matching
tr|A0A0D2XJQ5|A0A0D2XJQ5_FUSO4 Ubiquitin-60S ribosomal protein L40 OS=Fusarium oxysporum f. sp. lycopersici (strain 4287 / CBS 123668 / FGSC 9935 / NRRL 34936) GN=FOXG_04169 PE=4 SV=1;K4B017;W9JPZ8;tr|A0A0D2Y9B4|A0A0D2Y9B4_FUSO4 Ubiquitin-40S ribosomal protein S27a OS=Fusarium oxysporum f. sp. lycopersici (strain 4287 / CBS 123668 / FGSC 9935 / NRRL 34936) GN=FOXG_12884 PE=4 SV=1;K4CX88;P62980;K4…	tr|A0A0D2XJQ5|A0A0D2XJQ5_FUSO4 Ubiquitin-60S ribosomal protein L40 OS=Fusarium oxysporum f. sp. lycopersici (strain 4287 / CBS 123668 / FGSC 9935 / NRRL 34936) GN=FOXG_04169 PE=4 SV=1;K4B017;W9JPZ8;tr|A0A0D2Y9B4|A0A0D2Y9B4_FUSO4 Ubiquitin-40S ribosomal protein S27a OS=Fusarium oxysporum f. sp. lycopersici (strain 4287 / CBS 123668 / FGSC 9935 / NRRL 34936) GN=FOXG_12884 PE=4 SV=1;K4CX88;P62980;K4…	1;1;1;1;1;1;1;1;1;1;1;1;1;1;1	1;1;1;1;1;1;1;1;1;1;1;1;1;1;1	1;1;1;1;1;1;1;1;1;1;1;1;1;1;1	>tr|A0A0D2XJQ5|A0A0D2XJQ5_FUSO4 Ubiquitin-60S ribosomal protein L40 OS=Fusarium oxysporum f. sp. lycopersici (strain 4287 / CBS 123668 / FGSC 9935 / NRRL 34936) GN=FOXG_04169 PE=4 SV=1;>tr|K4B017|K4B017_SOLLC Uncharacterized protein OS=Solanum lycopersicum	15	1	1	1	1	1	1	1	1	1	1	0	1	1	1	1	1	1	1	0	1	1	1	1	1	1	1	0	7	7	7	14.596	128	128;128;154;154;154;156;156;156;190;222;229;229;457;457;534	0	2.4416	By matching	By matching	By MS/MS	By MS/MS	By MS/MS	By matching	By matching	By matching
Q43779;P14830;K4AX22	Q43779;P14830;K4AX22	4;4;4	4;4;4	4;4;4	>sp|Q43779|SODC2_SOLLC Superoxide dismutase [Cu-Zn] 2 OS=Solanum lycopersicum GN=SODCC.5 PE=3 SV=3;>sp|P14830|SODC1_SOLLC Superoxide dismutase [Cu-Zn] 1 OS=Solanum lycopersicum GN=SODCC.1 PE=2 SV=2;>tr|K4AX22|K4AX22_SOLLC Superoxide dismutase [Cu-Zn] OS=So	3	4	4	4	3	3	3	4	3	3	3	3	3	3	3	4	3	3	3	3	3	3	3	4	3	3	3	3	28.3	28.3	28.3	15.241	152	152;152;152	0	22.586	By MS/MS	By MS/MS	By MS/MS	By MS/MS	By MS/MS	By MS/MS	By MS/MS	By MS/MS
K4AX61	K4AX61	12	12	12	>tr|K4AX61|K4AX61_SOLLC Uncharacterized protein OS=Solanum lycopersicum PE=4 SV=1	1	12	12	12	12	12	12	11	10	12	10	12	12	12	12	11	10	12	10	12	12	12	12	11	10	12	10	12	27.6	27.6	27.6	54.041	485	485	0	106.54	By MS/MS	By MS/MS	By MS/MS	By MS/MS	By MS/MS	By MS/MS	By MS/MS	By MS/MS
K4AX84	K4AX84	10	10	10	>tr|K4AX84|K4AX84_SOLLC Purple acid phosphatase OS=Solanum lycopersicum PE=3 SV=1	1	10	10	10	9	9	5	9	9	6	7	7	9	9	5	9	9	6	7	7	9	9	5	9	9	6	7	7	17.7	17.7	17.7	71.316	639	639	0	51.863	By MS/MS	By MS/MS	By matching	By MS/MS	By MS/MS	By MS/MS	By matching	By MS/MS
K4AXB4	K4AXB4	2	2	2	>tr|K4AXB4|K4AXB4_SOLLC Uncharacterized protein OS=Solanum lycopersicum PE=4 SV=1	1	2	2	2	1	1	1	2	1	1	1	2	1	1	1	2	1	1	1	2	1	1	1	2	1	1	1	2	21.6	21.6	21.6	20.322	194	194	0	5.2269	By matching	By MS/MS	By matching	By MS/MS	By matching	By MS/MS	By MS/MS	By MS/MS
K4AXG2	K4AXG2	10	10	10	>tr|K4AXG2|K4AXG2_SOLLC Uncharacterized protein OS=Solanum lycopersicum PE=4 SV=1	1	10	10	10	9	9	7	8	8	7	8	6	9	9	7	8	8	7	8	6	9	9	7	8	8	7	8	6	36.2	36.2	36.2	40.627	362	362	0	55.837	By MS/MS	By MS/MS	By MS/MS	By MS/MS	By MS/MS	By MS/MS	By MS/MS	By MS/MS
K4AXM7	K4AXM7	1	1	1	>tr|K4AXM7|K4AXM7_SOLLC Uncharacterized protein OS=Solanum lycopersicum PE=4 SV=1	1	1	1	1	1	1	1	1	1	1	0	1	1	1	1	1	1	1	0	1	1	1	1	1	1	1	0	1	3.7	3.7	3.7	20.572	190	190	0	1.7652	By matching	By matching	By MS/MS	By matching	By matching	By matching	By matching	By matching
K4AXP0;K4AXN7;K4AXN5;K4AXN6;K4AXN9;K4AXN8	K4AXP0	10;2;1;1;1;1	10;2;1;1;1;1	10;2;1;1;1;1	>tr|K4AXP0|K4AXP0_SOLLC Uncharacterized protein OS=Solanum lycopersicum PE=3 SV=1	6	10	10	10	9	9	10	10	9	9	10	10	9	9	10	10	9	9	10	10	9	9	10	10	9	9	10	10	26.2	26.2	26.2	47.301	428	428;576;201;292;430;433	0	34.688	By MS/MS	By MS/MS	By MS/MS	By MS/MS	By MS/MS	By MS/MS	By MS/MS	By MS/MS
K4AXP3;K4AXP1	K4AXP3	3;1	3;1	3;1	>tr|K4AXP3|K4AXP3_SOLLC Uncharacterized protein OS=Solanum lycopersicum PE=3 SV=1	2	3	3	3	1	3	1	3	3	2	1	3	1	3	1	3	3	2	1	3	1	3	1	3	3	2	1	3	14.4	14.4	14.4	47	437	437;441	0	8.8564	By matching	By MS/MS	By matching	By MS/MS	By MS/MS	By MS/MS	By matching	By MS/MS
K4AXP6	K4AXP6	2	2	2	>tr|K4AXP6|K4AXP6_SOLLC Uncharacterized protein OS=Solanum lycopersicum PE=3 SV=1	1	2	2	2	1	1	1	2	2	2	1	1	1	1	1	2	2	2	1	1	1	1	1	2	2	2	1	1	6.8	6.8	6.8	46.548	438	438	0	1.8396	By matching	By matching	By matching	By matching	By matching	By MS/MS	By MS/MS	By matching
K4AXQ9	K4AXQ9	1	1	1	>tr|K4AXQ9|K4AXQ9_SOLLC Uncharacterized protein OS=Solanum lycopersicum PE=4 SV=1	1	1	1	1	0	0	0	1	1	1	1	0	0	0	0	1	1	1	1	0	0	0	0	1	1	1	1	0	6.1	6.1	6.1	37.213	342	342	0	1.5395	By matching	By matching	By matching	By matching	By matching	By matching	By MS/MS	By matching
K4AXX2;K4AXX3;K4B2W8	K4AXX2	3;1;1	3;1;1	3;1;1	>tr|K4AXX2|K4AXX2_SOLLC Uncharacterized protein OS=Solanum lycopersicum PE=4 SV=1	3	3	3	3	3	3	3	3	2	3	3	3	3	3	3	3	2	3	3	3	3	3	3	3	2	3	3	3	15	15	15	25.598	226	226;178;232	0	6.951	By MS/MS	By MS/MS	By MS/MS	By MS/MS	By MS/MS	By MS/MS	By MS/MS	By MS/MS
K4AY49	K4AY49	4	4	4	>tr|K4AY49|K4AY49_SOLLC Uncharacterized protein OS=Solanum lycopersicum PE=4 SV=1	1	4	4	4	3	4	2	3	3	3	1	4	3	4	2	3	3	3	1	4	3	4	2	3	3	3	1	4	13.4	13.4	13.4	47.604	425	425	0	52.219	By MS/MS	By MS/MS	By matching	By MS/MS	By MS/MS	By matching	By matching	By matching
K4AYG4	K4AYG4	5	1	1	>tr|K4AYG4|K4AYG4_SOLLC Uncharacterized protein OS=Solanum lycopersicum PE=4 SV=1	1	5	1	1	5	3	4	3	4	4	4	5	1	1	1	1	1	1	1	1	1	1	1	1	1	1	1	1	5.7	1.4	1.4	83.64	769	769	0.0090909	0.89532	By matching	By MS/MS	By MS/MS	By matching	By MS/MS	By MS/MS	By MS/MS	By matching
K4AYP9	K4AYP9	3	3	3	>tr|K4AYP9|K4AYP9_SOLLC Uncharacterized protein OS=Solanum lycopersicum PE=4 SV=1	1	3	3	3	1	2	2	2	2	2	2	3	1	2	2	2	2	2	2	3	1	2	2	2	2	2	2	3	21	21	21	20.605	186	186	0	6.832	By MS/MS	By matching	By matching	By MS/MS	By MS/MS	By MS/MS	By matching	By MS/MS
P47921;K4AYT8	P47921;K4AYT8	2;2	2;2	2;2	>sp|P47921|NDK_SOLLC Nucleoside diphosphate kinase (Fragment) OS=Solanum lycopersicum PE=2 SV=1;>tr|K4AYT8|K4AYT8_SOLLC Nucleoside diphosphate kinase OS=Solanum lycopersicum PE=3 SV=1	2	2	2	2	2	2	2	2	2	2	2	1	2	2	2	2	2	2	2	1	2	2	2	2	2	2	2	1	9.7	9.7	9.7	15.679	144	144;148	0	5.8631	By matching	By MS/MS	By matching	By matching	By matching	By MS/MS	By MS/MS	By matching
K4AYV3	K4AYV3	3	3	3	>tr|K4AYV3|K4AYV3_SOLLC Uncharacterized protein OS=Solanum lycopersicum PE=4 SV=1	1	3	3	3	3	3	3	3	3	3	3	3	3	3	3	3	3	3	3	3	3	3	3	3	3	3	3	3	22.2	22.2	22.2	19.383	189	189	0	48.639	By MS/MS	By MS/MS	By MS/MS	By MS/MS	By MS/MS	By MS/MS	By MS/MS	By MS/MS
K4AZ58	K4AZ58	1	1	1	>tr|K4AZ58|K4AZ58_SOLLC Uncharacterized protein OS=Solanum lycopersicum PE=4 SV=1	1	1	1	1	0	0	0	0	1	0	1	1	0	0	0	0	1	0	1	1	0	0	0	0	1	0	1	1	1.6	1.6	1.6	66.988	607	607	0.0089087	0.81339	By matching	By matching	By matching	By matching	By matching	By matching	By MS/MS	By matching
K4AZ93	K4AZ93	9	9	9	>tr|K4AZ93|K4AZ93_SOLLC Uncharacterized protein OS=Solanum lycopersicum PE=4 SV=1	1	9	9	9	7	8	7	7	7	7	7	7	7	8	7	7	7	7	7	7	7	8	7	7	7	7	7	7	30.7	30.7	30.7	43.073	414	414	0	80.236	By MS/MS	By MS/MS	By MS/MS	By MS/MS	By MS/MS	By MS/MS	By MS/MS	By MS/MS
K4B031	K4B031	1	1	1	>tr|K4B031|K4B031_SOLLC Uncharacterized protein OS=Solanum lycopersicum PE=4 SV=1	1	1	1	1	1	1	1	1	1	1	1	1	1	1	1	1	1	1	1	1	1	1	1	1	1	1	1	1	6.7	6.7	6.7	21.332	194	194	0	2.8149	By MS/MS	By matching	By MS/MS	By matching	By matching	By matching	By MS/MS	By matching
K4B033	K4B033	13	13	13	>tr|K4B033|K4B033_SOLLC Uncharacterized protein OS=Solanum lycopersicum PE=3 SV=1	1	13	13	13	10	12	12	11	12	12	12	12	10	12	12	11	12	12	12	12	10	12	12	11	12	12	12	12	31.2	31.2	31.2	47.719	443	443	0	76.737	By MS/MS	By MS/MS	By MS/MS	By MS/MS	By MS/MS	By MS/MS	By MS/MS	By MS/MS
K4B088	K4B088	4	2	1	>tr|K4B088|K4B088_SOLLC Uncharacterized protein OS=Solanum lycopersicum PE=4 SV=1	1	4	2	1	3	4	4	3	3	3	3	4	2	2	2	2	2	2	2	2	1	1	1	1	1	1	1	1	6.3	2.6	1.5	72.641	662	662	0	4.2329	By matching	By MS/MS	By MS/MS	By MS/MS	By matching	By MS/MS	By MS/MS	By MS/MS
K4B0D3	K4B0D3	5	5	5	>tr|K4B0D3|K4B0D3_SOLLC Uncharacterized protein OS=Solanum lycopersicum PE=3 SV=1	1	5	5	5	5	5	5	4	4	4	4	3	5	5	5	4	4	4	4	3	5	5	5	4	4	4	4	3	25.3	25.3	25.3	31.147	293	293	0	7.6877	By MS/MS	By MS/MS	By MS/MS	By MS/MS	By MS/MS	By MS/MS	By MS/MS	By MS/MS
K4B0Q2;K4CAM0	K4B0Q2	16;1	16;1	15;0	>tr|K4B0Q2|K4B0Q2_SOLLC Uncharacterized protein OS=Solanum lycopersicum PE=4 SV=1	2	16	16	15	11	14	12	12	12	12	11	8	11	14	12	12	12	12	11	8	10	13	11	12	12	11	10	7	45.9	45.9	45.9	45.739	414	414;361	0	191.02	By MS/MS	By MS/MS	By MS/MS	By MS/MS	By MS/MS	By MS/MS	By MS/MS	By MS/MS
K4B0T9	K4B0T9	1	1	1	>tr|K4B0T9|K4B0T9_SOLLC Uncharacterized protein OS=Solanum lycopersicum PE=4 SV=1	1	1	1	1	1	1	1	1	1	1	1	1	1	1	1	1	1	1	1	1	1	1	1	1	1	1	1	1	4.2	4.2	4.2	42.629	380	380	0	13.873	By matching	By MS/MS	By matching	By matching	By matching	By matching	By matching	By matching
K4B111;Q6DUX3;K4B112	K4B111;Q6DUX3;K4B112	4;3;3	4;3;3	4;3;3	>tr|K4B111|K4B111_SOLLC Uncharacterized protein OS=Solanum lycopersicum PE=3 SV=1;>sp|Q6DUX3|TCTP_SOLLC Translationally-controlled tumor protein homolog OS=Solanum lycopersicum GN=TCTP PE=2 SV=1;>tr|K4B112|K4B112_SOLLC Uncharacterized protein OS=Solanum ly	3	4	4	4	4	4	4	4	4	4	4	4	4	4	4	4	4	4	4	4	4	4	4	4	4	4	4	4	27.4	27.4	27.4	18.912	168	168;168;168	0	17.968	By MS/MS	By MS/MS	By MS/MS	By MS/MS	By MS/MS	By MS/MS	By MS/MS	By matching
K4B143	K4B143	6	6	6	>tr|K4B143|K4B143_SOLLC Uncharacterized protein OS=Solanum lycopersicum PE=4 SV=1	1	6	6	6	5	6	3	4	4	6	3	5	5	6	3	4	4	6	3	5	5	6	3	4	4	6	3	5	33	33	33	23.231	206	206	0	24.84	By MS/MS	By MS/MS	By matching	By MS/MS	By MS/MS	By MS/MS	By matching	By MS/MS
K4B166	K4B166	2	2	2	>tr|K4B166|K4B166_SOLLC Uncharacterized protein OS=Solanum lycopersicum PE=3 SV=1	1	2	2	2	1	1	2	0	1	1	1	0	1	1	2	0	1	1	1	0	1	1	2	0	1	1	1	0	8.9	8.9	8.9	39.454	359	359	0	6.2174	By matching	By matching	By MS/MS	By matching	By matching	By matching	By MS/MS	By matching
K4B172	K4B172	8	8	8	>tr|K4B172|K4B172_SOLLC Uncharacterized protein OS=Solanum lycopersicum PE=3 SV=1	1	8	8	8	5	6	7	6	7	6	6	6	5	6	7	6	7	6	6	6	5	6	7	6	7	6	6	6	21.6	21.6	21.6	47.602	417	417	0	15.192	By MS/MS	By MS/MS	By MS/MS	By MS/MS	By MS/MS	By MS/MS	By MS/MS	By matching
K4B1C4	K4B1C4	1	1	1	>tr|K4B1C4|K4B1C4_SOLLC Uncharacterized protein OS=Solanum lycopersicum PE=4 SV=1	1	1	1	1	1	1	0	0	0	0	0	0	1	1	0	0	0	0	0	0	1	1	0	0	0	0	0	0	3.2	3.2	3.2	41.105	371	371	0	2.8742	By MS/MS	By matching	By matching	By matching	By matching	By matching	By matching	By matching
K4B1G1	K4B1G1	3	3	3	>tr|K4B1G1|K4B1G1_SOLLC Uncharacterized protein OS=Solanum lycopersicum PE=4 SV=1	1	3	3	3	3	2	2	2	2	2	2	2	3	2	2	2	2	2	2	2	3	2	2	2	2	2	2	2	11.9	11.9	11.9	29.21	268	268	0	7.6552	By MS/MS	By MS/MS	By MS/MS	By MS/MS	By MS/MS	By MS/MS	By matching	By matching
K4B1G8;K4B1G7	K4B1G8;K4B1G7	4;4	4;4	4;4	>tr|K4B1G8|K4B1G8_SOLLC Uncharacterized protein OS=Solanum lycopersicum PE=3 SV=1;>tr|K4B1G7|K4B1G7_SOLLC Uncharacterized protein OS=Solanum lycopersicum PE=3 SV=1	2	4	4	4	3	4	3	4	2	3	2	3	3	4	3	4	2	3	2	3	3	4	3	4	2	3	2	3	18.6	18.6	18.6	23.329	220	220;220	0	5.1803	By MS/MS	By MS/MS	By matching	By MS/MS	By MS/MS	By matching	By MS/MS	By matching
K4B1X7	K4B1X7	1	1	1	>tr|K4B1X7|K4B1X7_SOLLC Uncharacterized protein OS=Solanum lycopersicum PE=4 SV=1	1	1	1	1	1	1	1	1	1	1	1	1	1	1	1	1	1	1	1	1	1	1	1	1	1	1	1	1	7.6	7.6	7.6	17.83	158	158	0	1.8906	By matching	By matching	By matching	By matching	By matching	By matching	By matching	By MS/MS
K4B215	K4B215	3	3	3	>tr|K4B215|K4B215_SOLLC Uncharacterized protein OS=Solanum lycopersicum PE=4 SV=1	1	3	3	3	3	2	1	2	3	2	2	2	3	2	1	2	3	2	2	2	3	2	1	2	3	2	2	2	43	43	43	12.254	114	114	0	11.281	By MS/MS	By matching	By MS/MS	By MS/MS	By MS/MS	By MS/MS	By matching	By MS/MS
K4B267;K4CZW8	K4B267	17;2	17;2	17;2	>tr|K4B267|K4B267_SOLLC Uncharacterized protein OS=Solanum lycopersicum PE=4 SV=1	2	17	17	17	11	17	16	14	15	14	14	10	11	17	16	14	15	14	14	10	11	17	16	14	15	14	14	10	27.5	27.5	27.5	85.206	778	778;770	0	133.43	By MS/MS	By MS/MS	By MS/MS	By MS/MS	By MS/MS	By MS/MS	By MS/MS	By MS/MS
K4B273	K4B273	3	3	3	>tr|K4B273|K4B273_SOLLC Uncharacterized protein OS=Solanum lycopersicum PE=3 SV=1	1	3	3	3	2	2	3	2	2	3	2	2	2	2	3	2	2	3	2	2	2	2	3	2	2	3	2	2	14	14	14	18.669	186	186	0	32.544	By MS/MS	By MS/MS	By matching	By MS/MS	By matching	By MS/MS	By MS/MS	By MS/MS
K4B277	K4B277	14	14	13	>tr|K4B277|K4B277_SOLLC Peroxidase OS=Solanum lycopersicum PE=3 SV=1	1	14	14	13	13	10	6	13	13	12	7	11	13	10	6	13	13	12	7	11	12	10	6	13	13	11	6	11	55.1	55.1	55.1	35.955	332	332	0	162.08	By MS/MS	By MS/MS	By MS/MS	By MS/MS	By MS/MS	By MS/MS	By MS/MS	By MS/MS
K4B2J4;K4B2I9	K4B2J4;K4B2I9	2;2	2;2	1;1	>tr|K4B2J4|K4B2J4_SOLLC Uncharacterized protein OS=Solanum lycopersicum PE=3 SV=1;>tr|K4B2I9|K4B2I9_SOLLC Uncharacterized protein OS=Solanum lycopersicum PE=3 SV=1	2	2	2	1	1	2	2	2	1	1	1	2	1	2	2	2	1	1	1	2	1	1	1	1	0	1	1	1	3.9	3.9	2.2	71.876	670	670;681	0.0023641	0.99991	By matching	By MS/MS	By matching	By MS/MS	By matching	By matching	By matching	By matching
[truncated: 428 more rows]
[truncated: 57 more columns]

## Sheet: parameters
Parameter	Value
Version	1.5.2.8
User name	LCMS
Machine name	BICMAXQUANT2
Date of writing	05/30/2018 13:34:51
Fixed modifications	Carbamidomethyl (C)
[truncated: 59 more rows]

[truncated: 1 more sheets: summary]
