# Supplementary material for: Xylem Sap Proteomics Reveals Distinct Differences Between R Gene- and Endophyte-Mediated Resistance Against Fusarium Wilt Disease in Tomato
Source: Front Microbiol. 2018 Dec 4;9:2977. doi: 10.3389/fmicb.2018.02977 (PMC6288350; doi:10.3389/fmicb.2018.02977)
Supplement: TABLE S6 — Overview of the peptides matching NP24 and PR-5x proteins. [file Table_6.XLSX]

## Sheet: peptides
Sequence	N-term cleavage window	C-term cleavage window	Length	Missed cleavages	Mass	Proteins	Leading razor protein	Start position	End position	Unique (Groups)	Unique (Proteins)	Charges	PEP	Score	Intensity FR13_Mock_XS2	Intensity FR14_Mock_XS3	Intensity FR15_Mock_XS4	Intensity FR16_Fo47_XS1	Intensity FR17_Fo47_XS2	Intensity FR18_Fo47_XS3	Intensity FR19_Fo47_XS4	Intensity FR20_Coinoc_XS1	Intensity FR21_Coinoc_XS2	Intensity FR22_Coinoc_XS3	Intensity FR23_Coinoc_XS4	Intensity FR24_Fol007_XS1	Intensity FR25_Fol007_XS2	Intensity FR26_Fol007_XS3	Intensity FR27_Fol007_XS4	Intensity FR36_Mock_i2S1	Intensity FR37_Mock_i2S2	Intensity FR38_Mock_i2S3	Intensity FR39_Mock_i2S4	Intensity FR40_Fol007_i2S1	Intensity FR41_Fol007_i2S2	Intensity FR42_Fol007_i2S3	Intensity FR43_Fol007_i2S4	Reverse	Potential contaminant	id	Protein group IDs	Mod. peptide IDs	Evidence IDs	MS/MS IDs	Best MS/MS	Deamidation (NQ) site IDs	Oxidation (M) site IDs	MS/MS Count
CHAIHCTANINGECPR	PTKPSGGKCHAIHCTA	NINGECPRAIKVPGGC	16	0	1908.81	P12670	P12670	141	156	yes	yes	3	1.8587e-11	191.01	0	0	0	0	0	0	0	0	0	0	0	0	0	0	0	0	0	1662700	5229200	4481400	2339800	4931700	644370			398	626	442	7125;7126;7127;7128;7129;7130	3579;3580;3581	3580			3
INRGQTWVINAPR	TPIGGGRRINRGQTWV	TWVINAPRGTKMARIW	13	1	1523.83	P12670	P12670	47	59	yes	yes	2	3.6228e-08	187.11	0	0	0	2363800	4052200	1851600	2213600	2811700	4778900	8120100	12016000	0	0	0	0	805700	4663800	0	10898000	72433000	0	0	0			1832	626	2101	33110;33111;33112;33113;33114;33115;33116;33117;33118;33119;33120;33121	16300;16301;16302;16303;16304	16303	188		5
TGCNFNAAGR	KMARIWGRTGCNFNAA	CNFNAAGRGTCQTGDC	10	0	1066.46	P12670	P12670	70	79	yes	yes	2	8.3081e-09	260.76	2177400	1285900	4630400	6036200	6807800	1599600	5409000	6697300	5506900	5819400	3469100	1897400	933710	1693500	2411400	12301000	24501000	5586400	31943000	0	19545000	0	0			3332	626	3911	62380;62381;62382;62383;62384;62385;62386;62387;62388;62389;62390;62391;62392;62393;62394;62395;62396;62397;62398;62399	30843;30844;30845;30846;30847;30848;30849;30850;30851;30852;30853;30854;30855;30856;30857;30858;30859	30858			17
CHAIHCTANINGECPSPIR	PTNPSGGKCHAIHCTA	GECPSPIRVPGGCNNP	19	0	2205.98	Q8LPU1	Q8LPU1	141	159	yes	yes	2;3	3.4857e-27	245.04	0	0	0	15833000	17947000	8875900	13510000	31063000	52613000	132940000	144890000	0	0	0	0	1669700	0	0	1706800	226880000	391330000	121950000	16067000			399	658	443;444	7131;7132;7133;7134;7135;7136;7137;7138;7139;7140;7141;7142;7143;7144;7145;7146;7147;7148;7149;7150;7151;7152;7153;7154;7155;7156;7157;7158;7159;7160;7161	3582;3583;3584;3585;3586;3587;3588;3589;3590;3591;3592;3593;3594;3595;3596;3597;3598;3599;3600;3601	3592	194		20
CPNAYSYPQDDPTSIFTCPSGSTNYR	FSRFFKQRCPNAYSYP	PSGSTNYRVVFCP___	26	0	2997.25	Q8LPU1	Q8LPU1	196	221	yes	yes	3	0.00049617	75.483	0	0	0	15921000	25730000	16597000	4708600	49824000	91334000	100500000	145050000	0	0	0	0	1447700	0	0	0	113040000	192770000	106620000	32021000			418	658	466	7442;7443;7444;7445;7446;7447;7448;7449;7450;7451;7452;7453;7454	3717;3718;3719;3720;3721;3722	3717			6
GQTWVINAPR	GGGRRIDRGQTWVINA	TWVINAPRGTKMARIW	10	0	1140.6	K4CP63;Q01591;P12670;Q8LPU1	Q8LPU1	50	59	no	no	2	2.0112e-23	213.8	0	31641000	0	246010000	357070000	285540000	372490000	0	871080000	1152900000	1305500000	38417000	0	168750000	122170000	230620000	189150000	300320000	480850000	1341300000	1927800000	941490000	417930000			1303	459;658;626	1496	23220;23221;23222;23223;23224;23225;23226;23227;23228;23229;23230;23231;23232;23233;23234;23235;23236;23237;23238;23239	11502;11503;11504;11505;11506;11507;11508;11509;11510;11511;11512;11513;11514;11515;11516;11517	11510			13
IDRGQTWVINAPR	TPIGGGRRIDRGQTWV	TWVINAPRGTKMARIW	13	1	1524.82	K4CP63;Q01591;Q8LPU1	Q8LPU1	47	59	no	no	2	0.0016547	138.31	0	0	0	0	0	0	0	0	0	0	0	0	0	0	0	0	0	0	0	0	0	37083000	0			1537	459;658	1759	27262	13501	13501			1
NNCPYTVWAASTPIGGGR	YAATFEVRNNCPYTVW	STPIGGGRRIDRGQTW	18	0	1919.89	K4CP63;Q01591;P12670;Q8LPU1	Q8LPU1	28	45	no	no	2;3	2.1302e-41	284.23	1563000	21158000	33863000	113710000	164390000	102110000	35871000	281310000	384810000	509870000	702280000	1920000	904570	21137000	1928800	4797100	28079000	98029000	199860000	956460000	974430000	607090000	230030000			2479	459;658;626	2906;2907	45838;45839;45840;45841;45842;45843;45844;45845;45846;45847;45848;45849;45850;45851;45852;45853;45854;45855;45856;45857;45858;45859;45860;45861;45862;45863;45864;45865;45866;45867;45868;45869;45870;45871;45872;45873;45874;45875;45876;45877;45878;45879;45880;45881;45882;45883;45884;45885;45886;45887;45888;45889;45890;45891;45892	22263;22264;22265;22266;22267;22268;22269;22270;22271;22272;22273;22274;22275;22276;22277;22278;22279;22280;22281;22282;22283;22284;22285;22286;22287;22288;22289;22290;22291;22292;22293;22294;22295;22296;22297	22271	123;124		34
TNCNFNGAGR	KMARIWGRTNCNFNGA	CNFNGAGRGSCQTGDC	10	0	1109.47	Q8LPU1	Q8LPU1	70	79	yes	yes	2	2.2122e-32	304.63	376880	0	0	5104500	2286000	2103100	17788000	6893900	53939000	21541000	12039000	12002000	33643000	21628000	32737000	88998000	233020000	6081300	15131000	2497800000	224380000	709070000	1871400			3402	658	3985;3986	63667;63668;63669;63670;63671;63672;63673;63674;63675;63676;63677;63678;63679;63680;63681;63682;63683;63684;63685;63686;63687;63688;63689;63690;63691;63692;63693;63694;63695;63696;63697;63698;63699;63700;63701;63702;63703;63704;63705;63706	31467;31468;31469;31470;31471;31472;31473;31474;31475;31476;31477;31478;31479;31480;31481;31482;31483;31484;31485;31486;31487;31488;31489;31490;31491;31492	31482	195;196;197		26
VPGGCNNPCTTFGGQQYCCTQGPCGPTK	GECPSPIRVPGGCNNP	QGPCGPTKFSRFFKQR	28	0	3102.25	Q8LPU1	Q8LPU1	160	187	yes	yes	3	2.0506e-32	190.59	0	0	0	7895300	9914600	6742200	10221000	19950000	30580000	41800000	65111000	821500	0	3436600	6151000	1476100	0	0	0	81346000	165640000	58714000	22017000			3725	658	4354	70209;70210;70211;70212;70213;70214;70215;70216;70217;70218;70219;70220;70221;70222;70223;70224	34873;34874;34875;34876;34877;34878;34879;34880;34881;34882;34883	34876			11
